# Supplementary material for: Synergetic iridium and amine catalysis enables asymmetric [4+2] cycloadditions of vinyl aminoalcohols with carbonyls
Source: PubMed Central journal article supplement (PMC6586609; doi:10.1038/s41467-019-10674-3), 2019-06-20
Supplement: 41467_2019_10674_MOESM1_ESM.pdf [file 41467_2019_10674_MOESM1_ESM.pdf]

**Supplementary Information**

**Synergetic iridium and amine catalysis enables asymmetric [4+2]  
cycloadditions of vinyl aminoalcohols with carbonyls**

Zhang et al

## Supplementary Figures

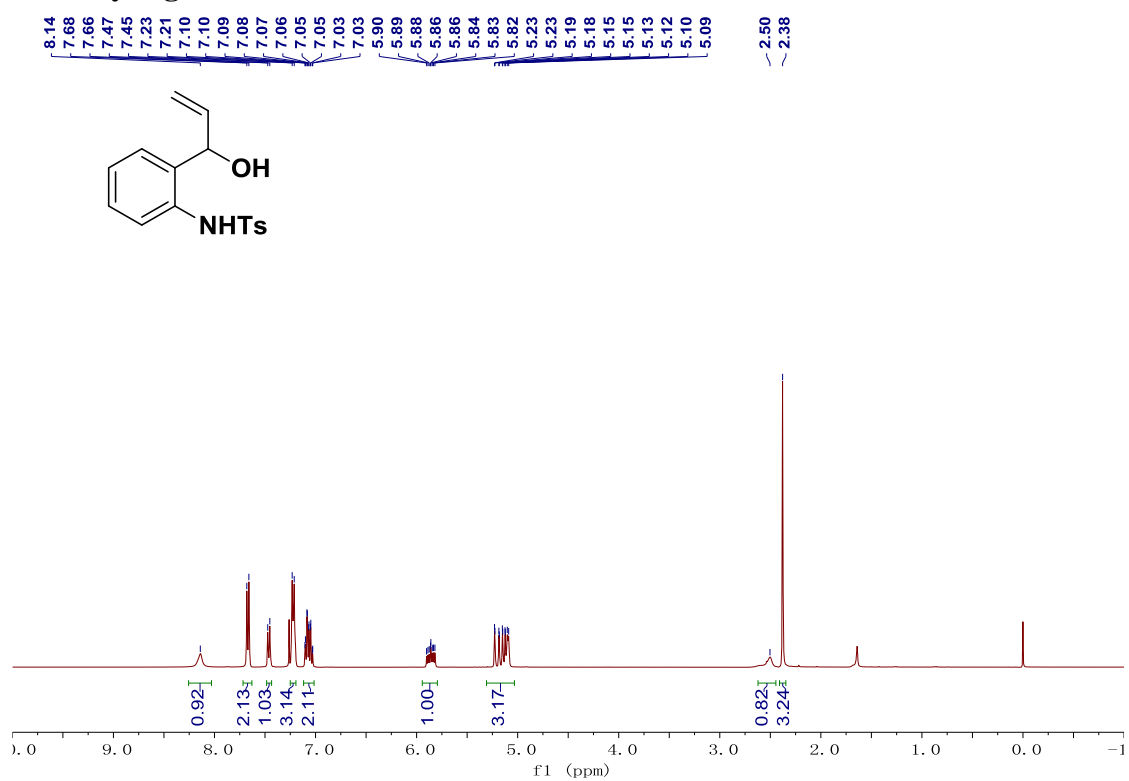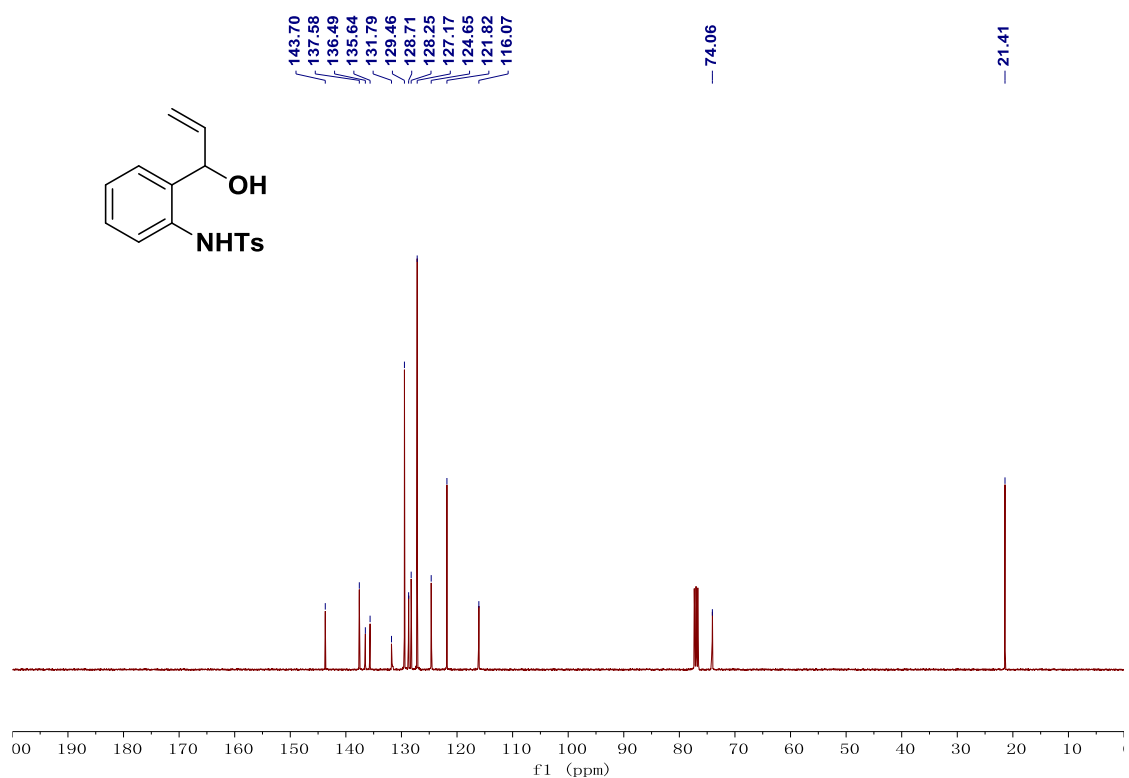

Supplementary Figure 1. <sup>1</sup>H and <sup>13</sup>C NMR of compound 1a.

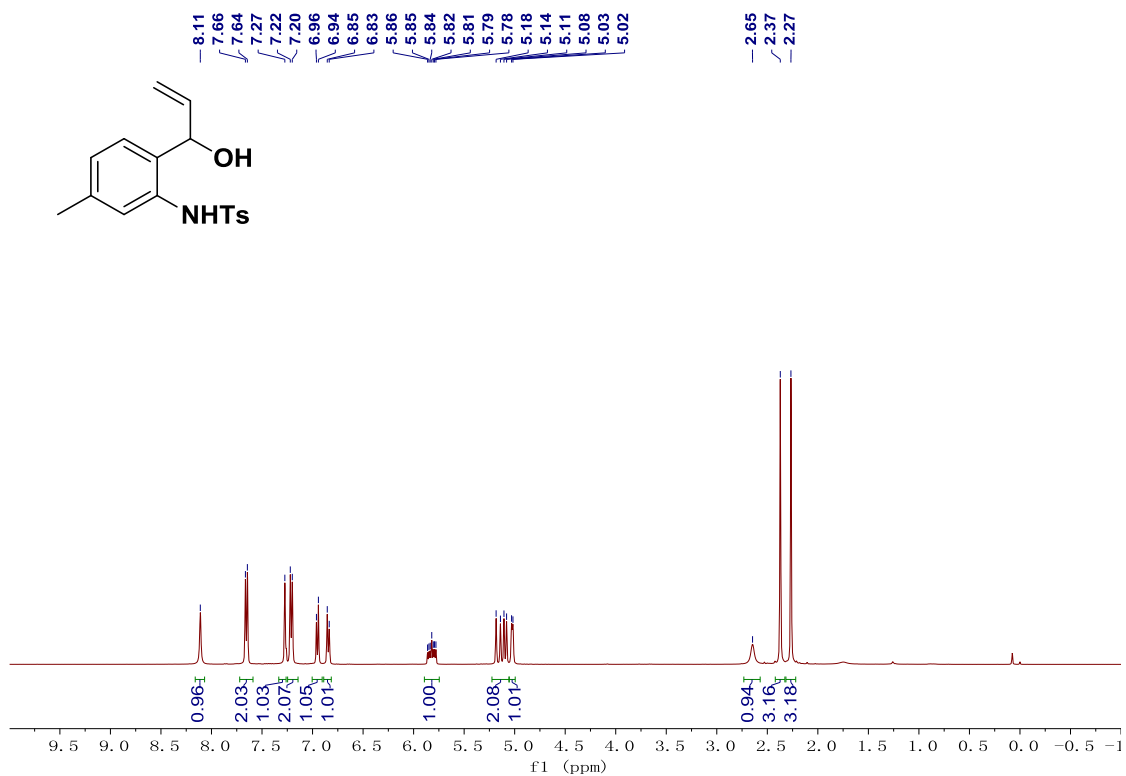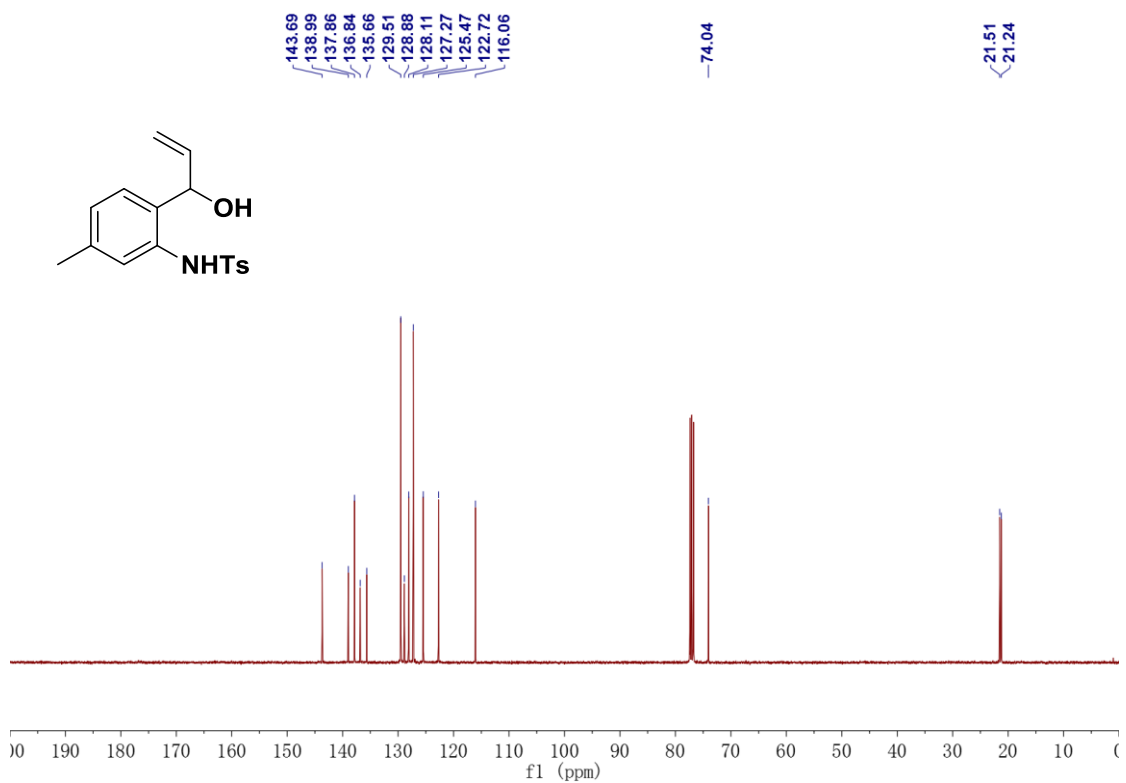

Supplementary Figure 2. <sup>1</sup>H and <sup>13</sup>C NMR of compound **1b**.

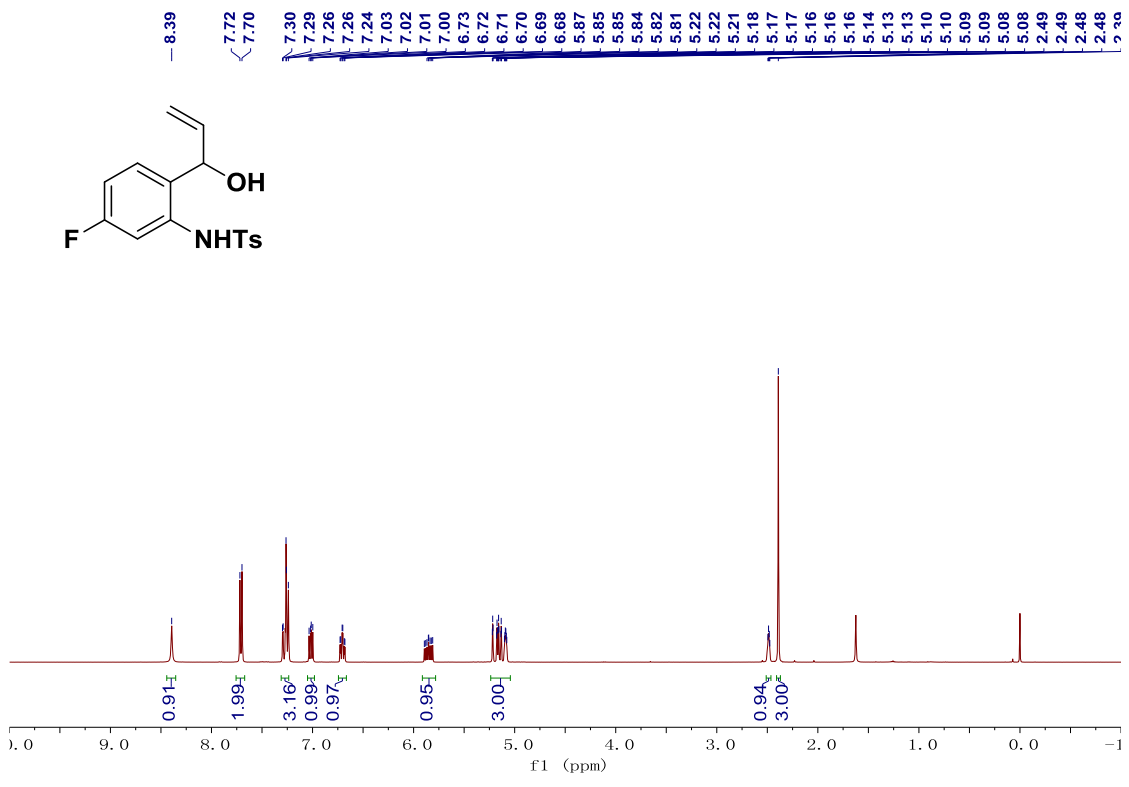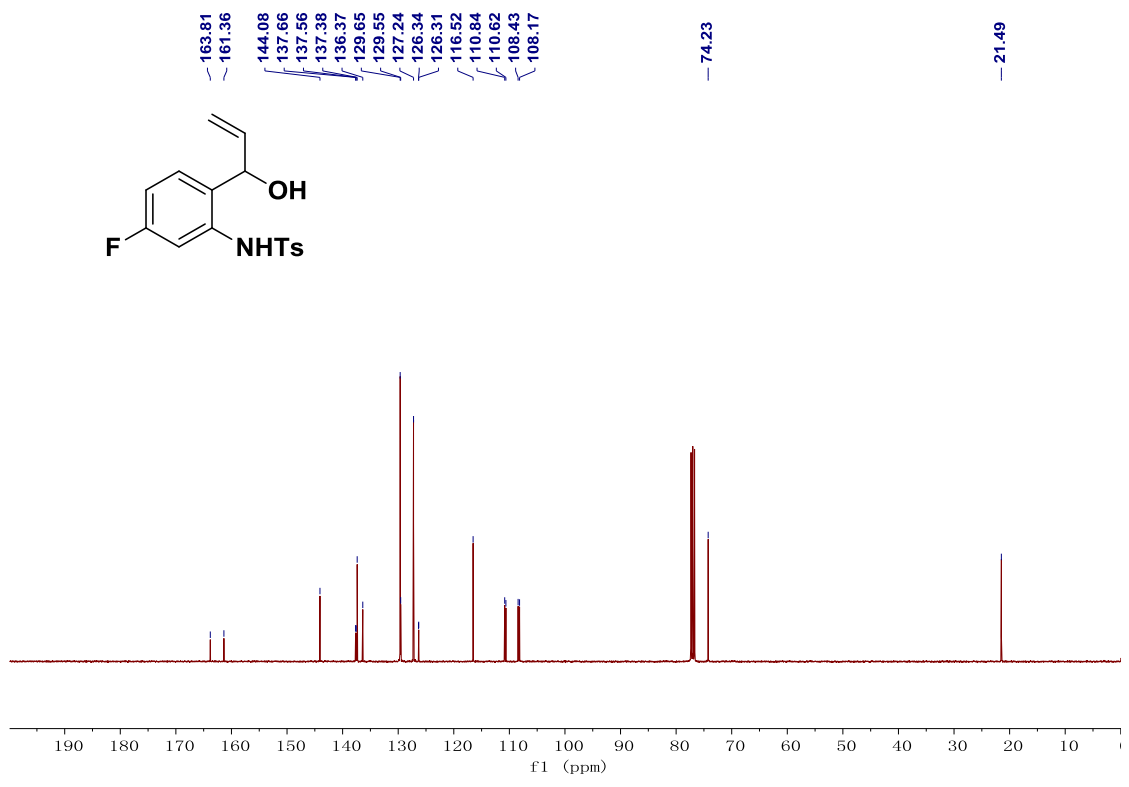

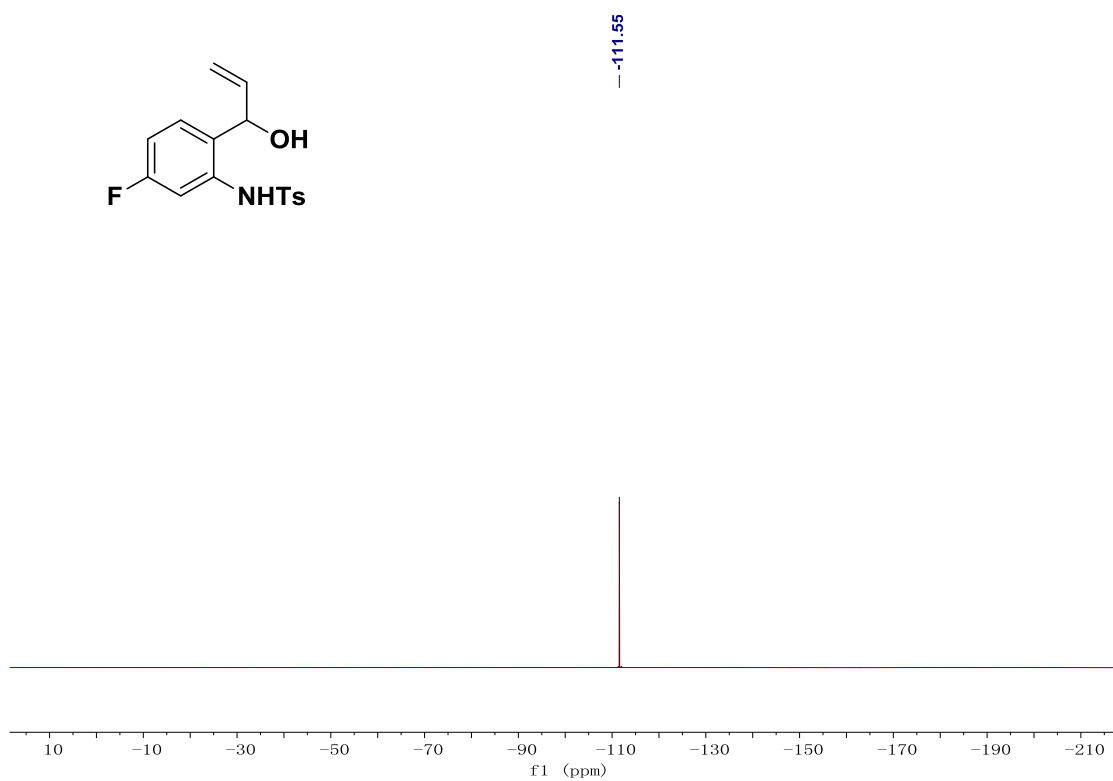

Supplementary Figure 3.  $^1\text{H}$  and  $^{13}\text{C}$  NMR  $^{19}\text{F}$  NMR of compound 1c.

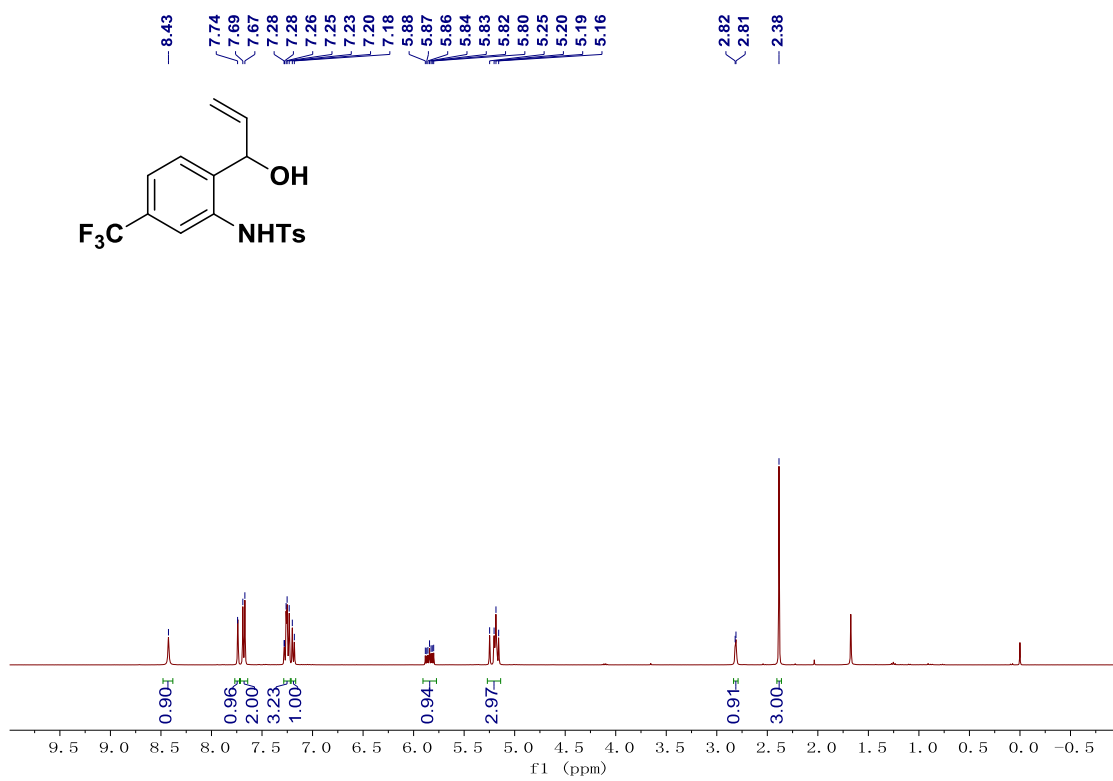

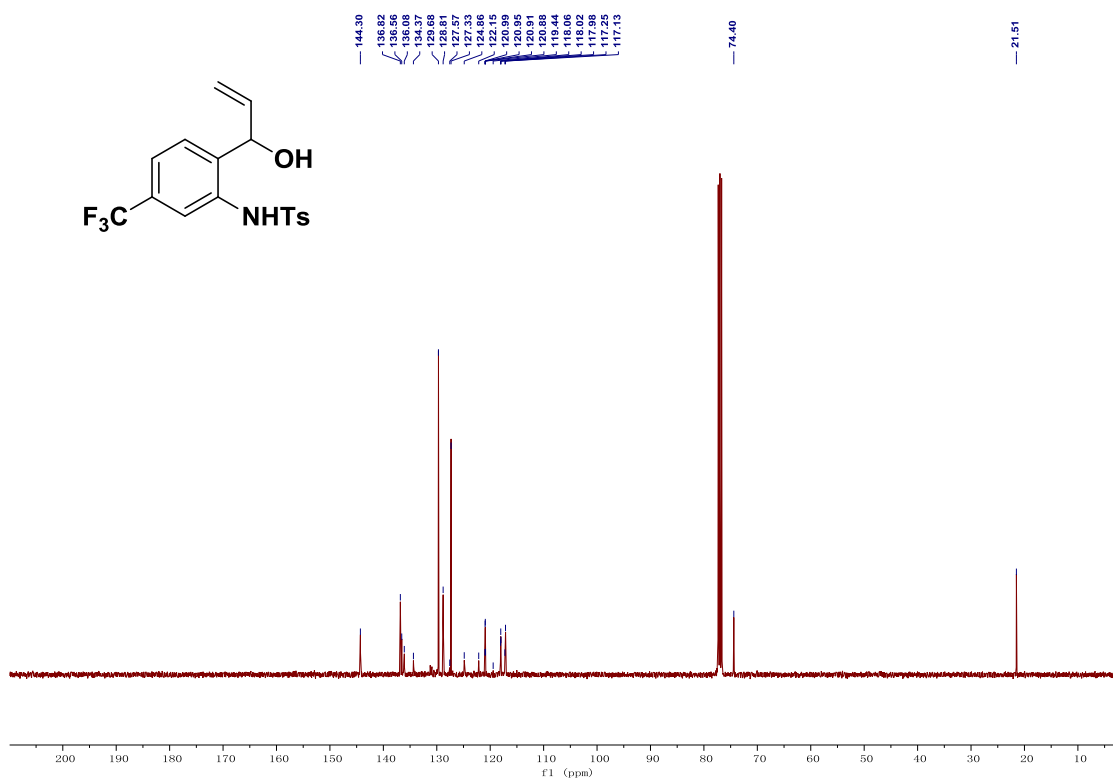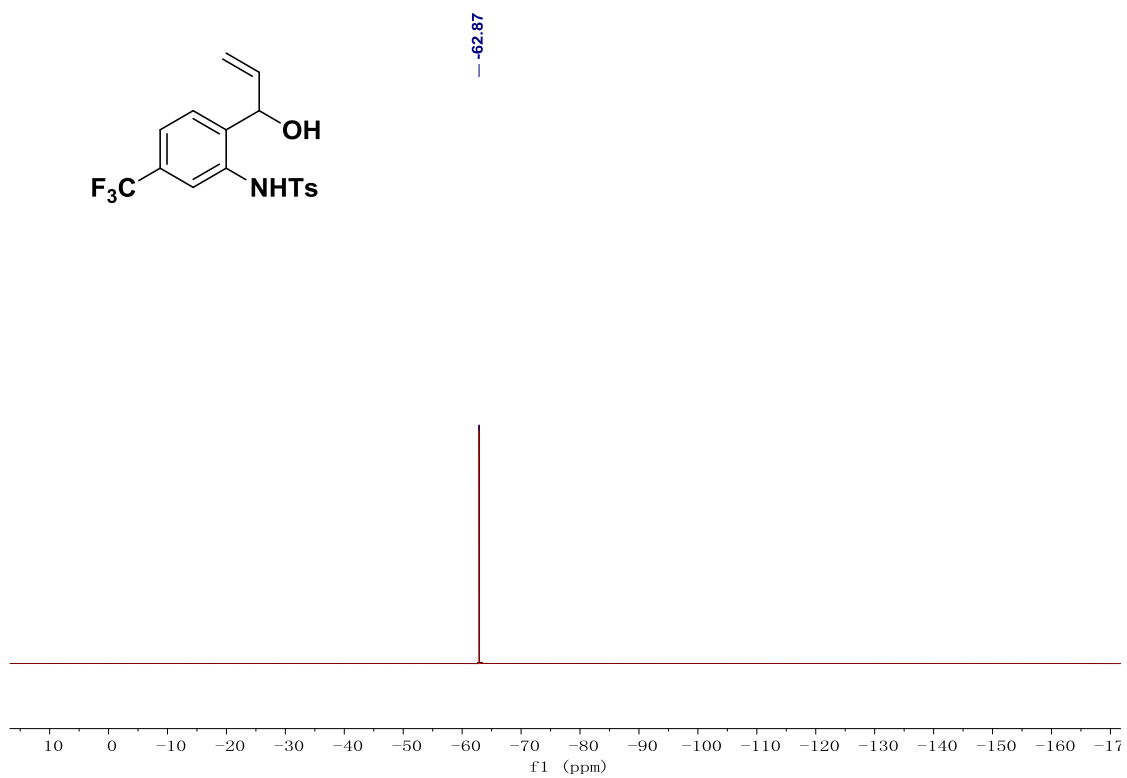

Supplementary Figure 4. <sup>1</sup>H and <sup>13</sup>C NMR <sup>19</sup>F NMR of compound 1d.

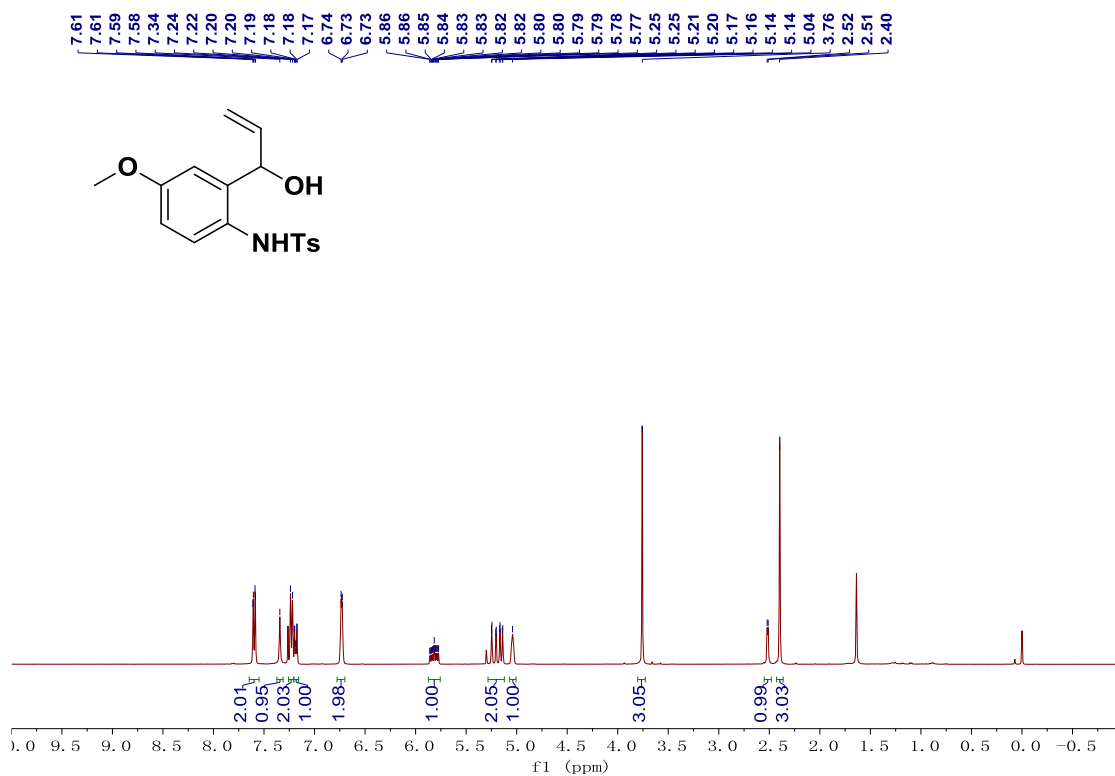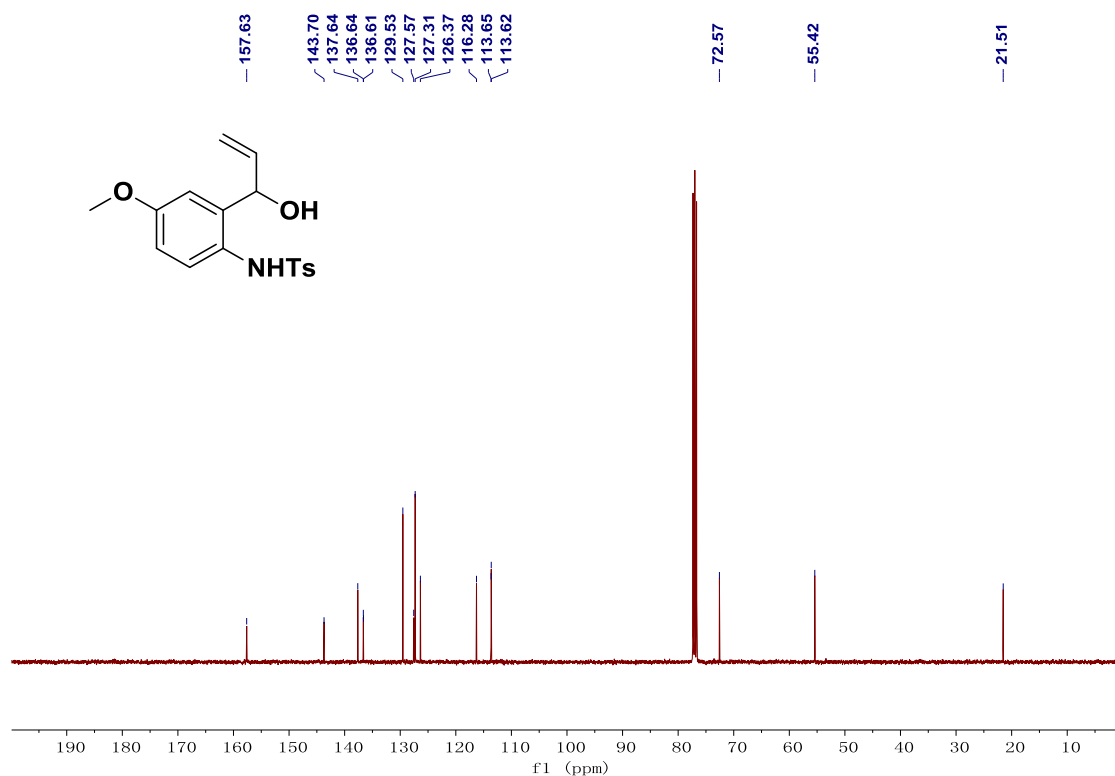

Supplementary Figure 5. <sup>1</sup>H and <sup>13</sup>C NMR of compound 1e.

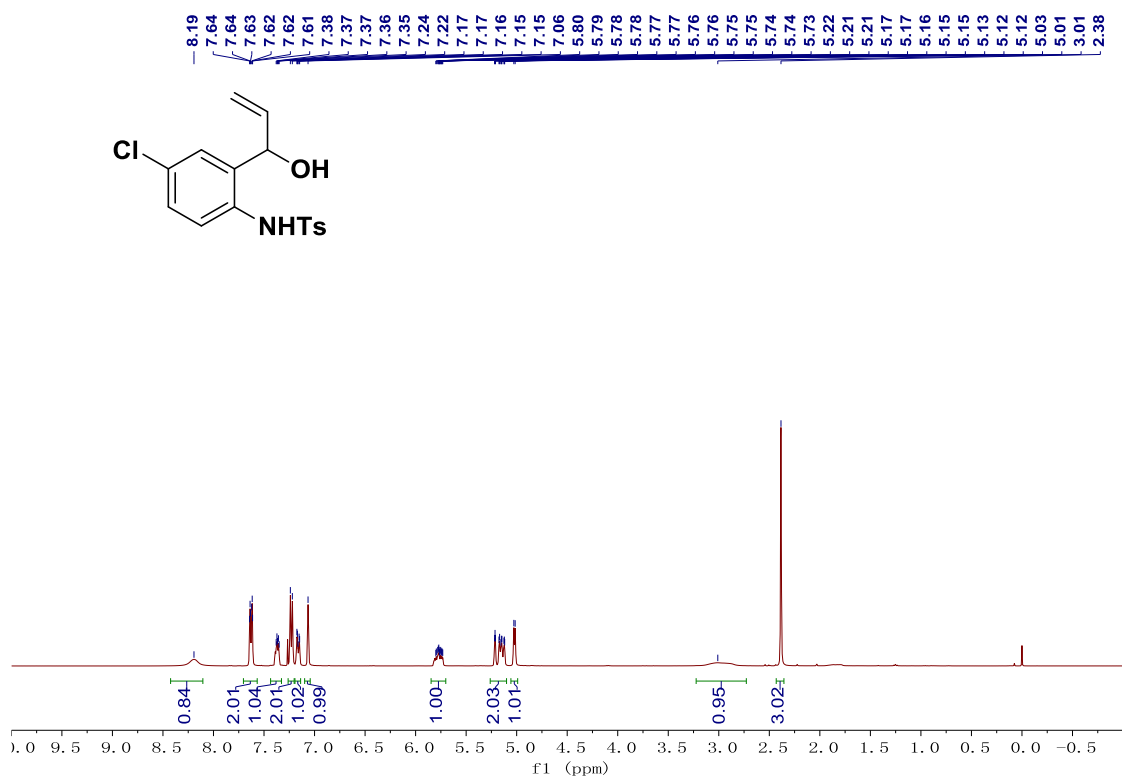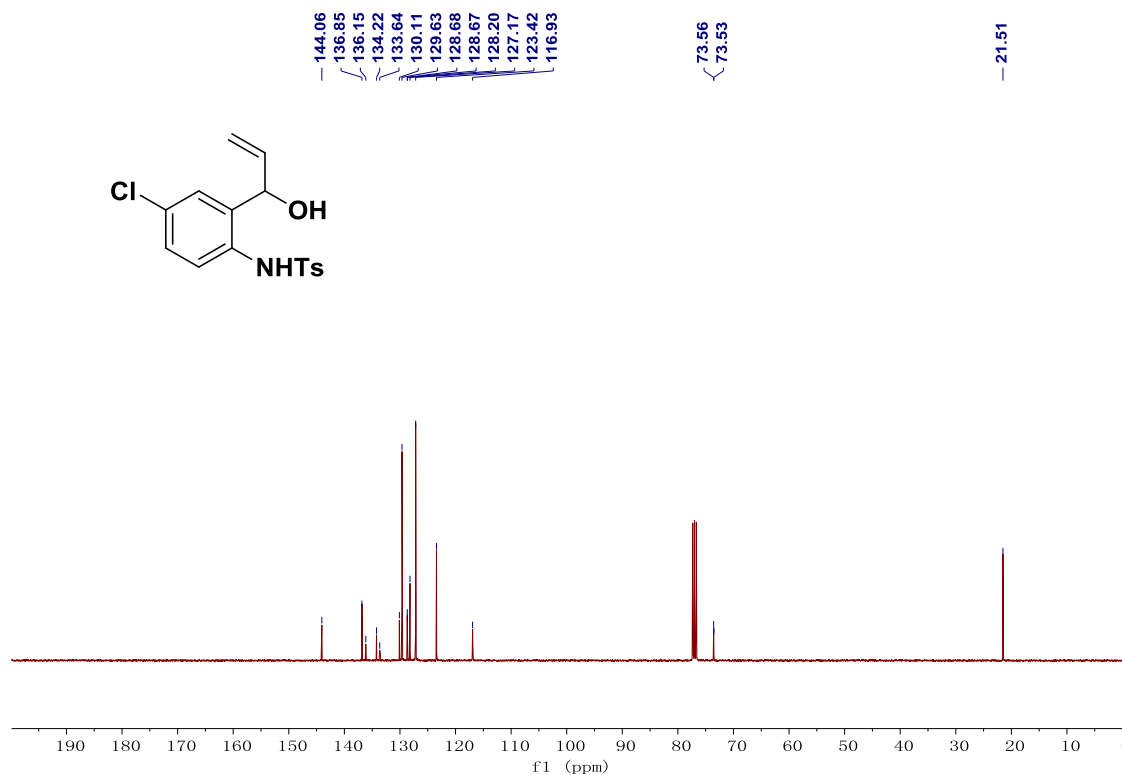

Supplementary Figure6.  $^1\text{H}$  and  $^{13}\text{C}$  NMR of compound **1f**.



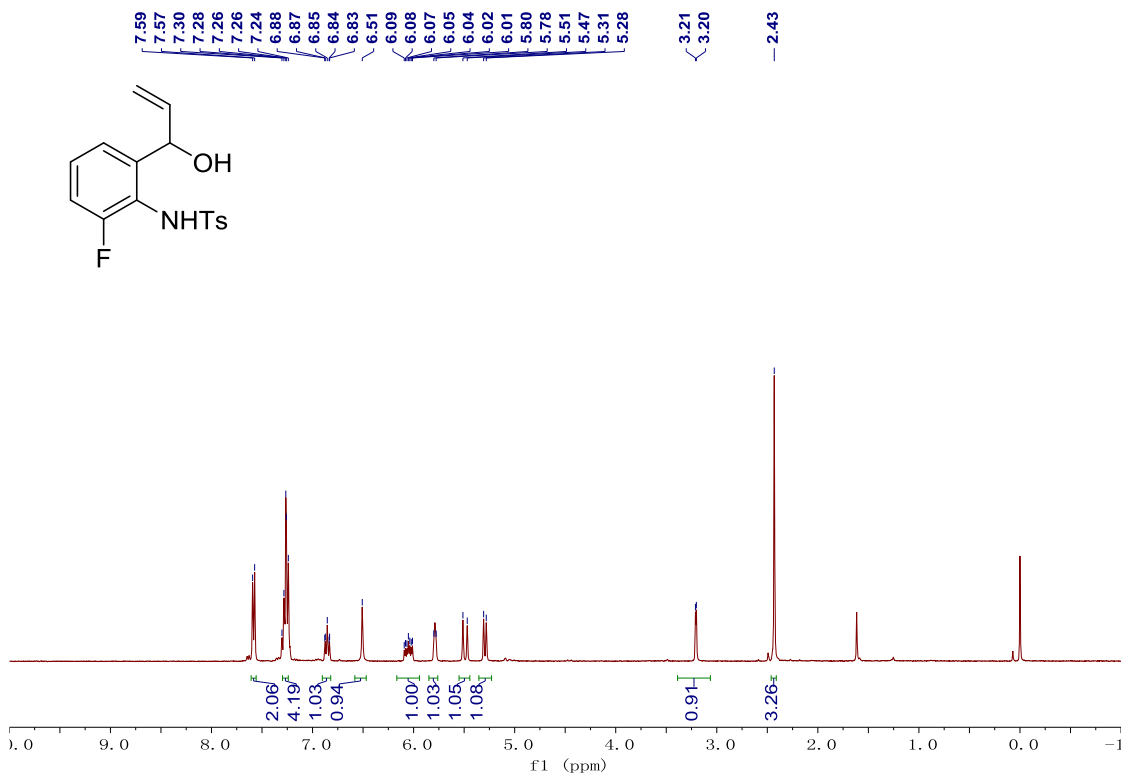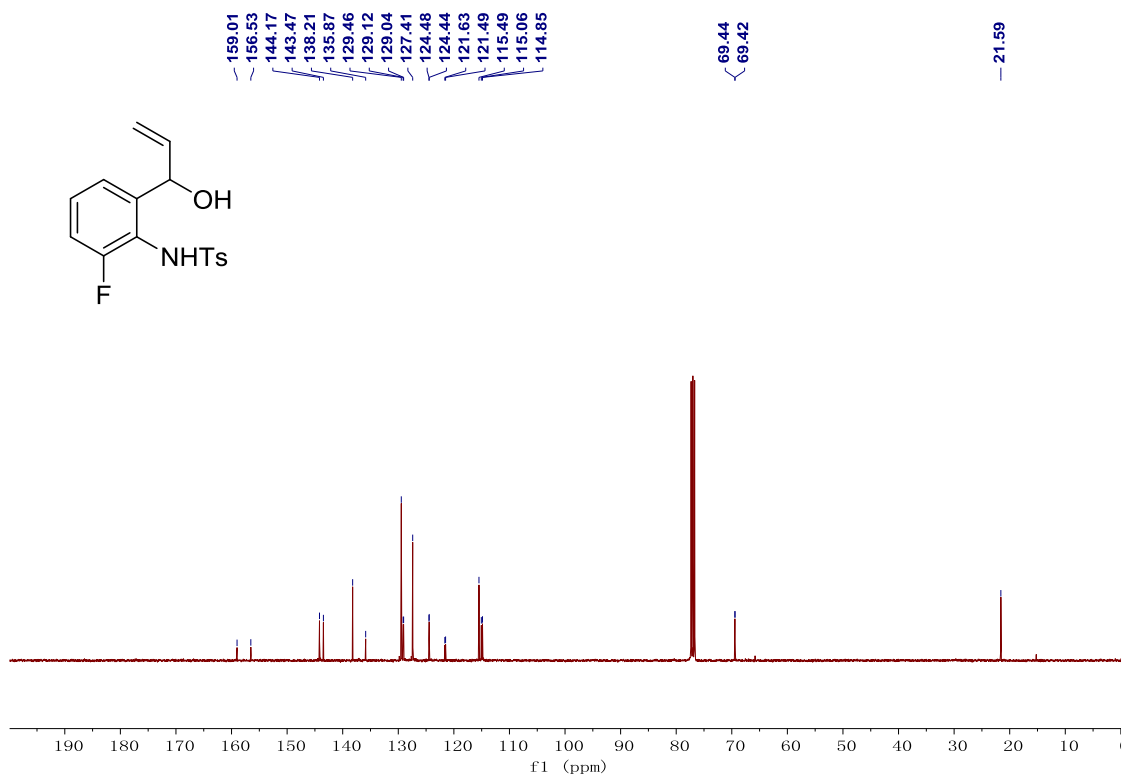

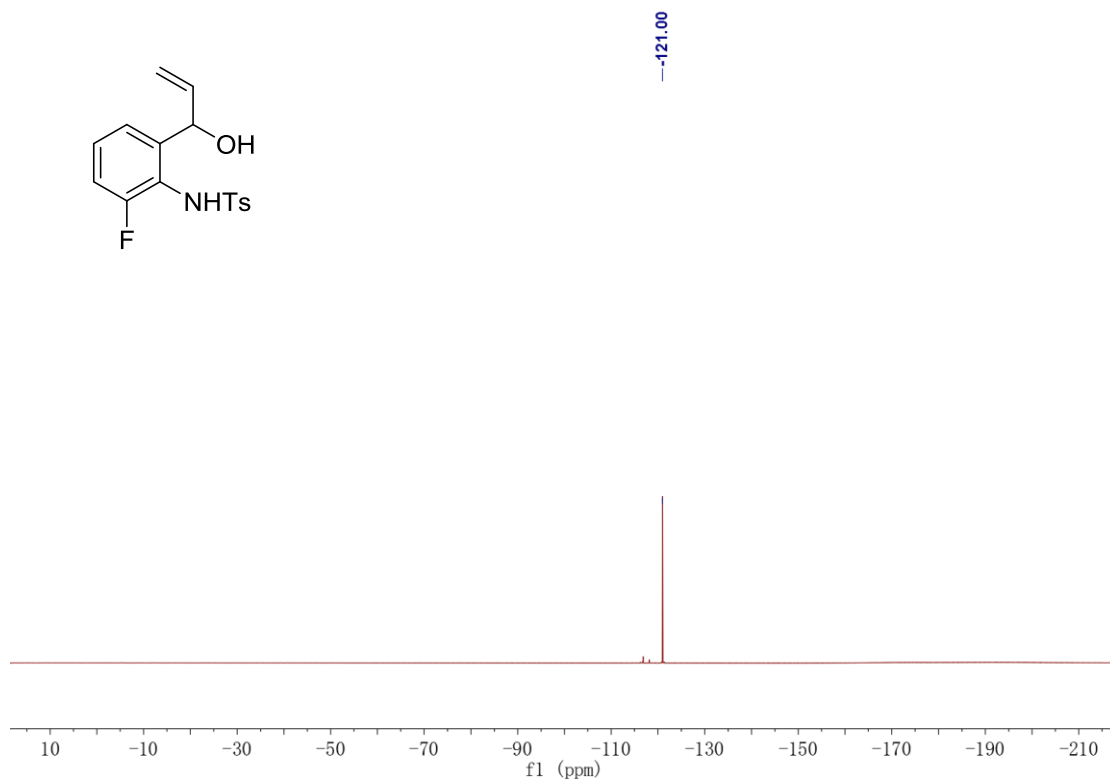

Supplementary Figure 7.  $^1\text{H}$  and  $^{13}\text{C}$  NMR  $^{19}\text{F}$  NMR of compound **1g**.

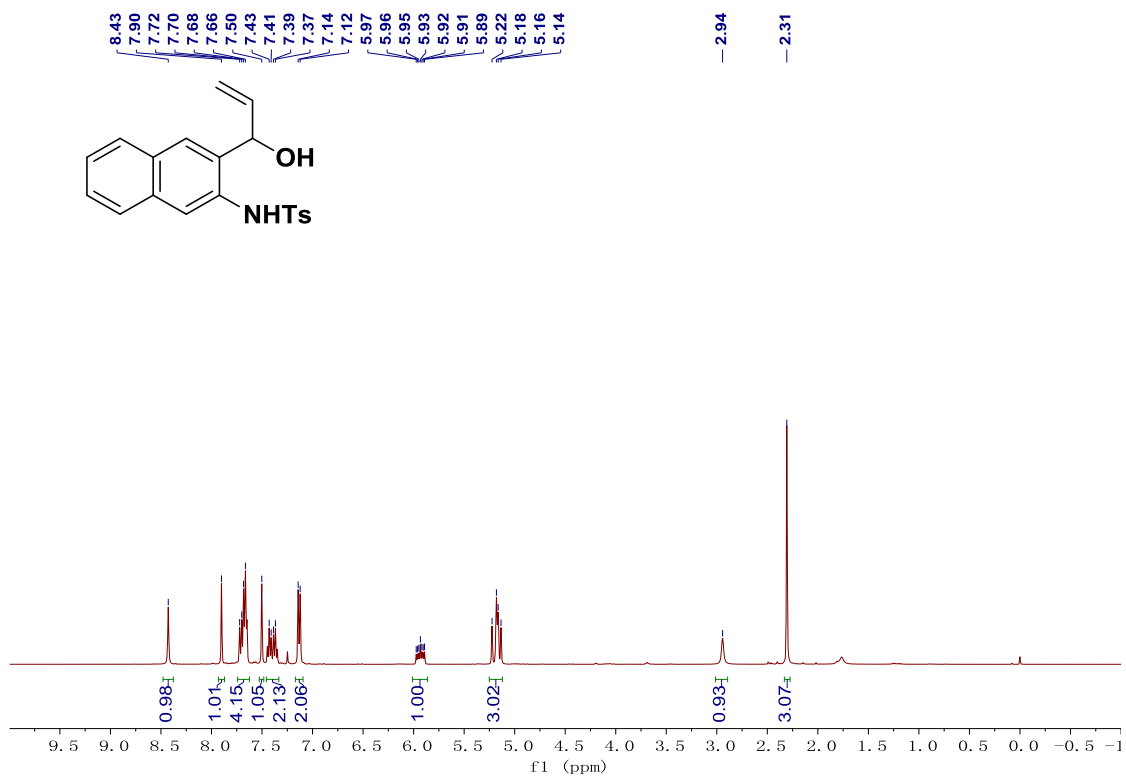

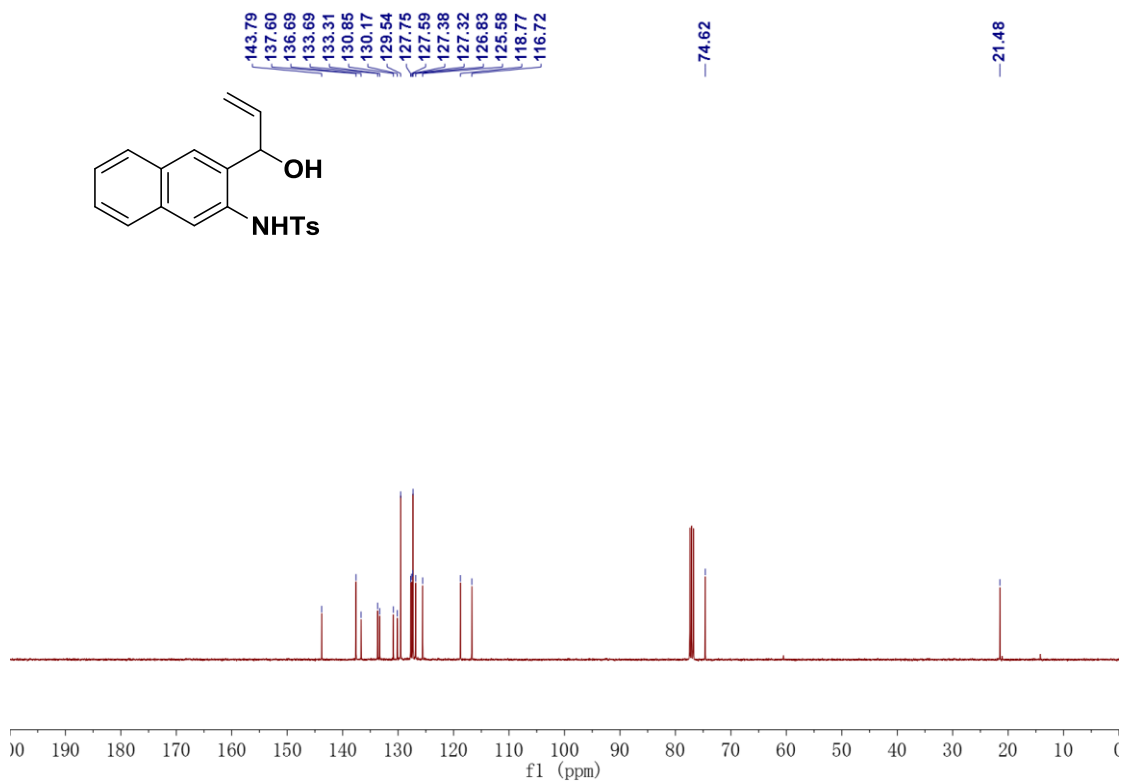

Supplementary Figure 8. <sup>1</sup>H and <sup>13</sup>C NMR of compound 1h.

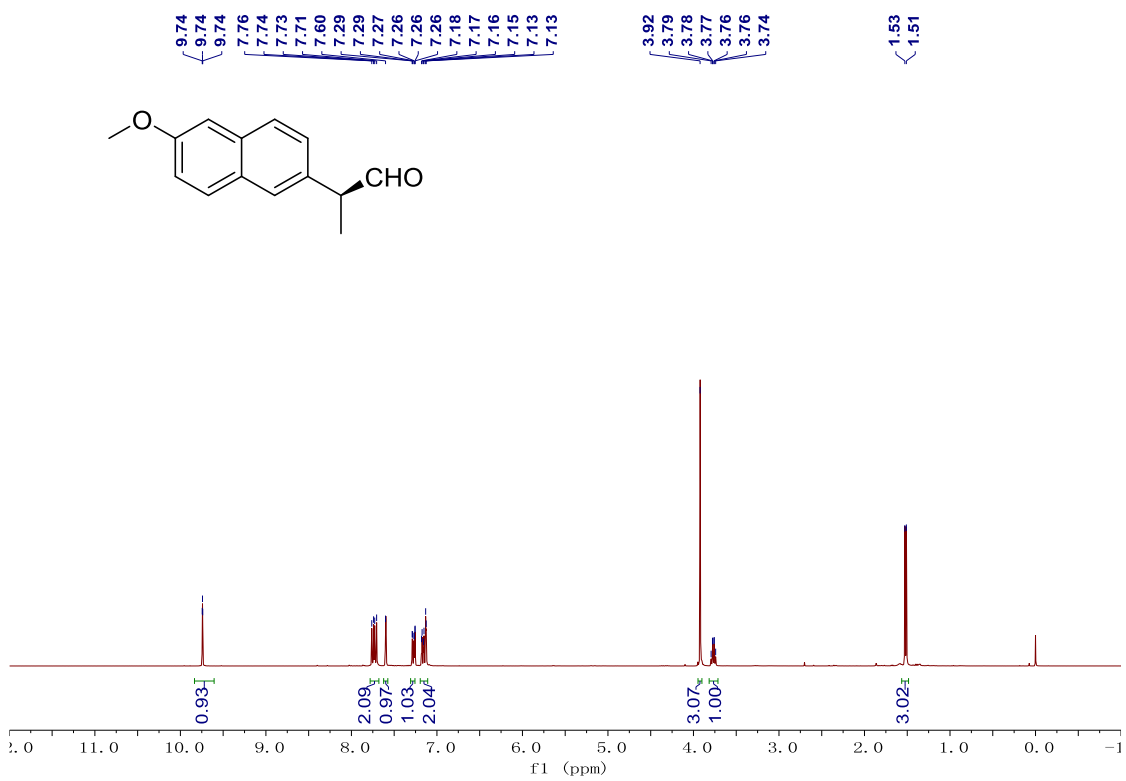

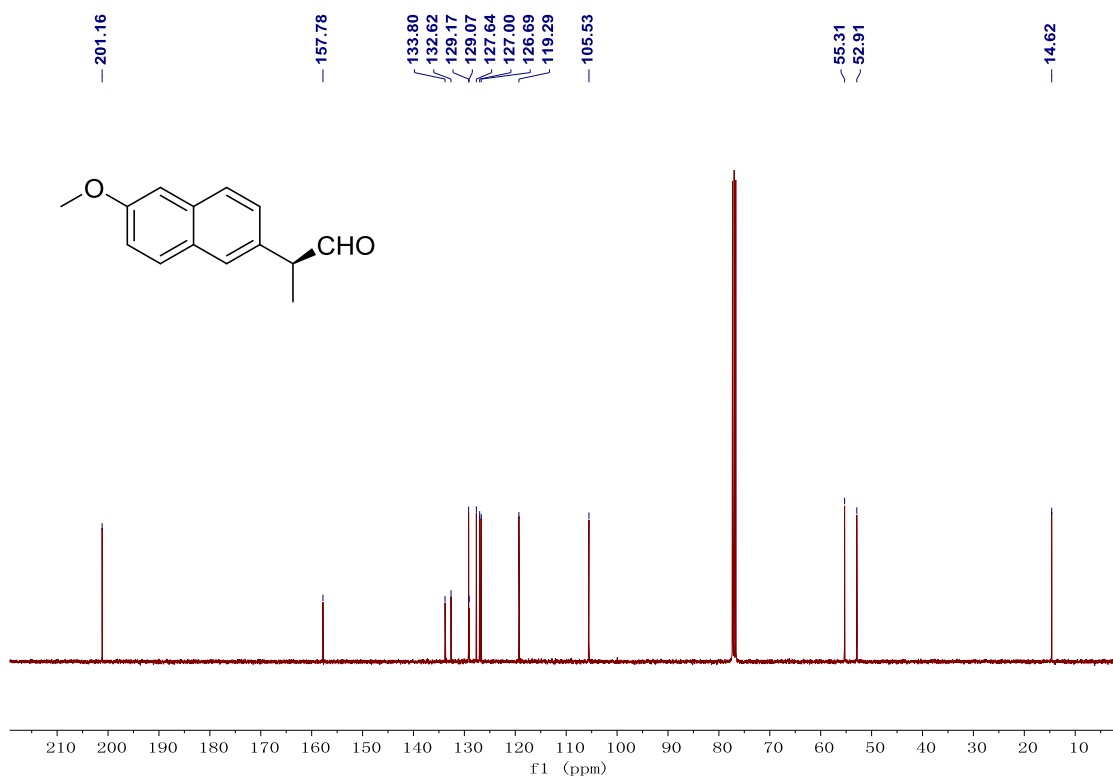

Supplementary Figure 9.  $^1\text{H}$  and  $^{13}\text{C}$  NMR of compound 2k.

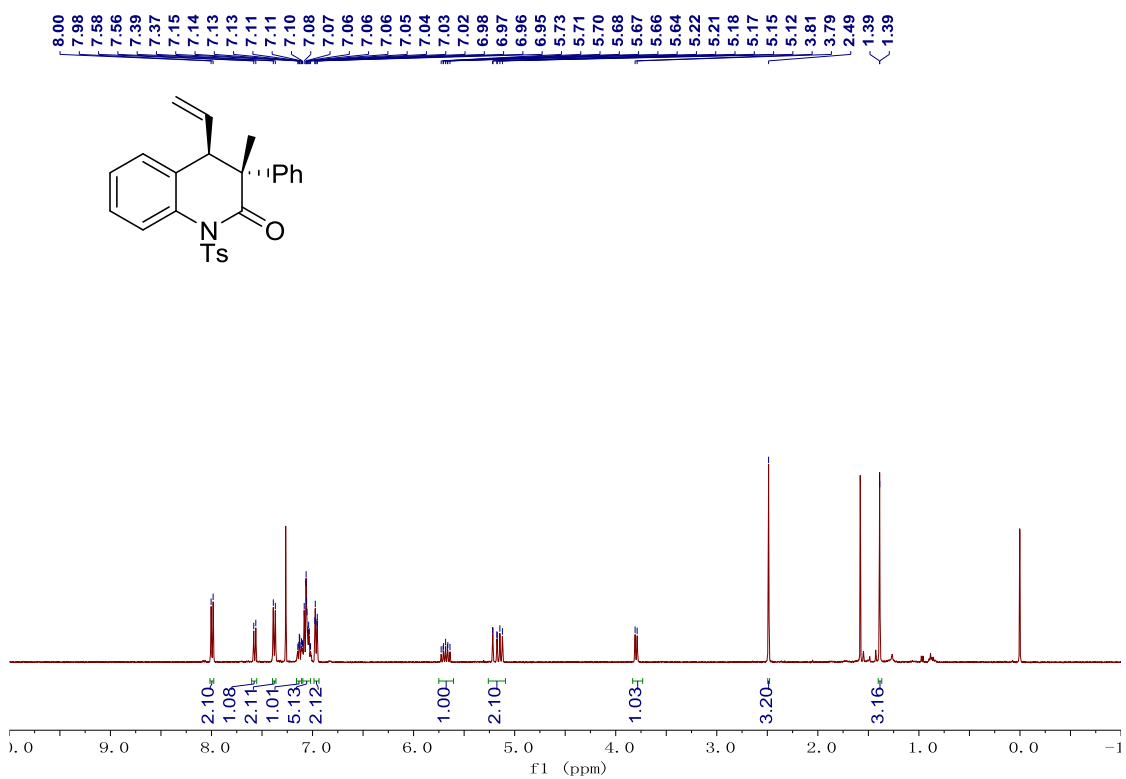

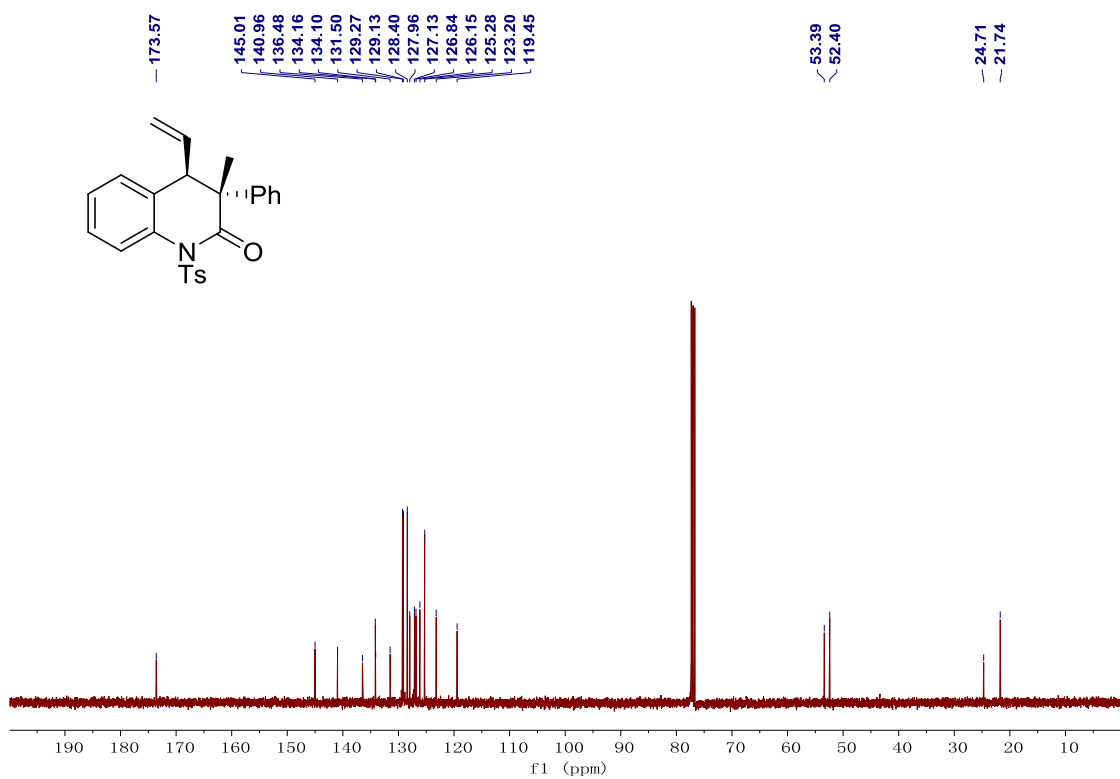

Supplementary Figure 10. <sup>1</sup>H and <sup>13</sup>C NMR of compound 3aa

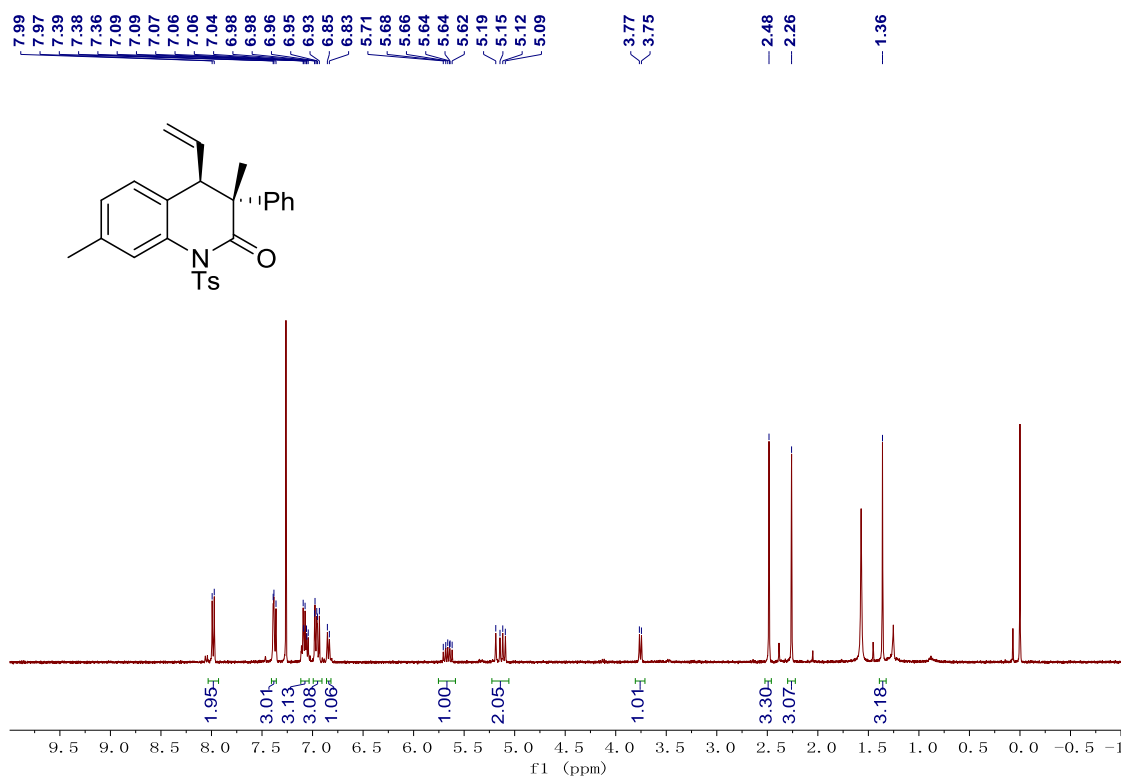

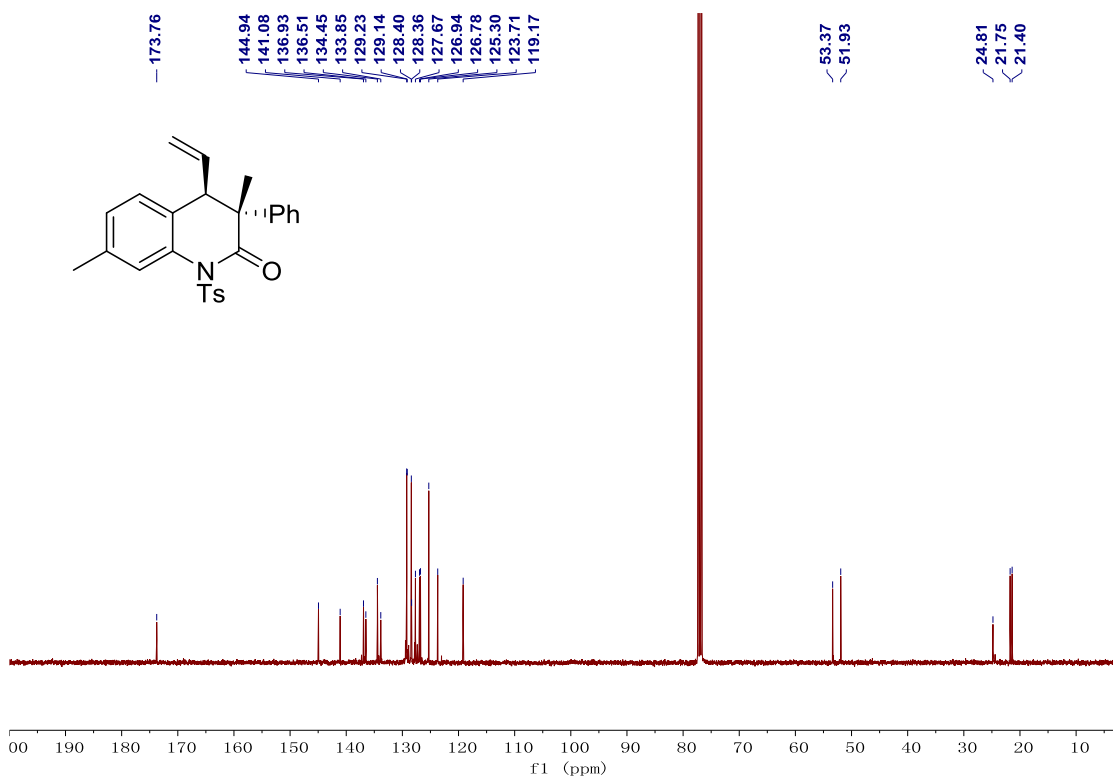

Supplementary Figure 11. <sup>1</sup>H and <sup>13</sup>C NMR of compound 3a

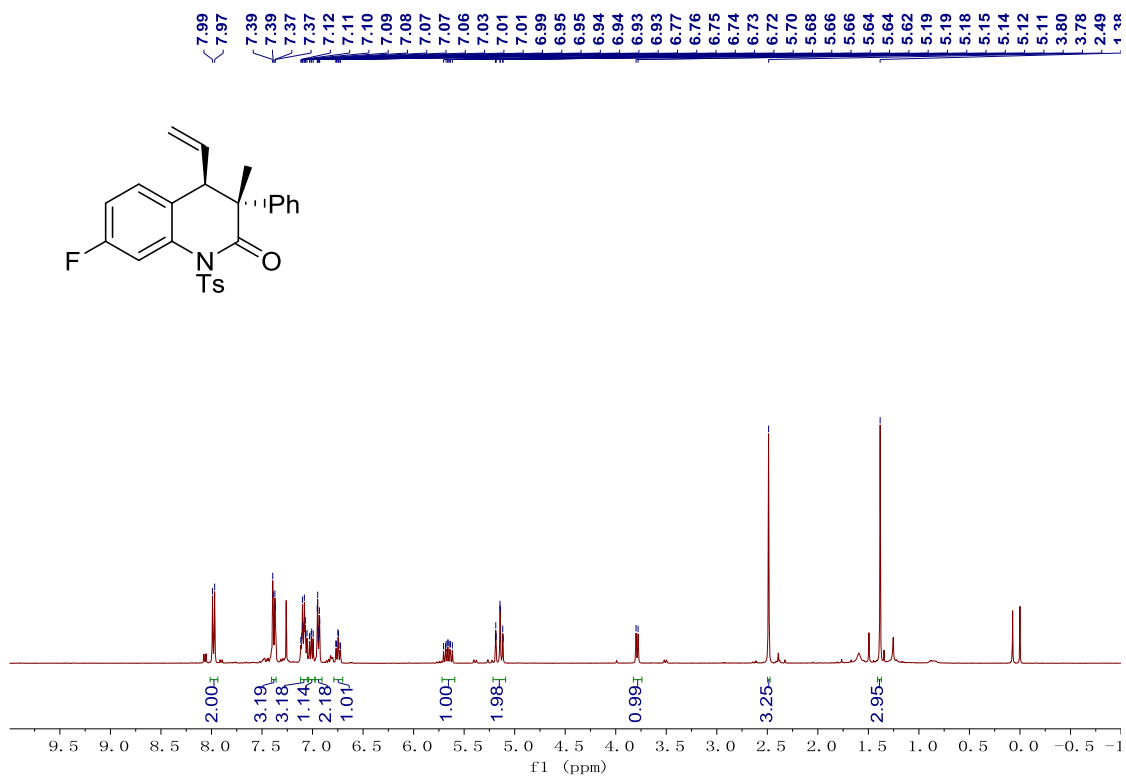

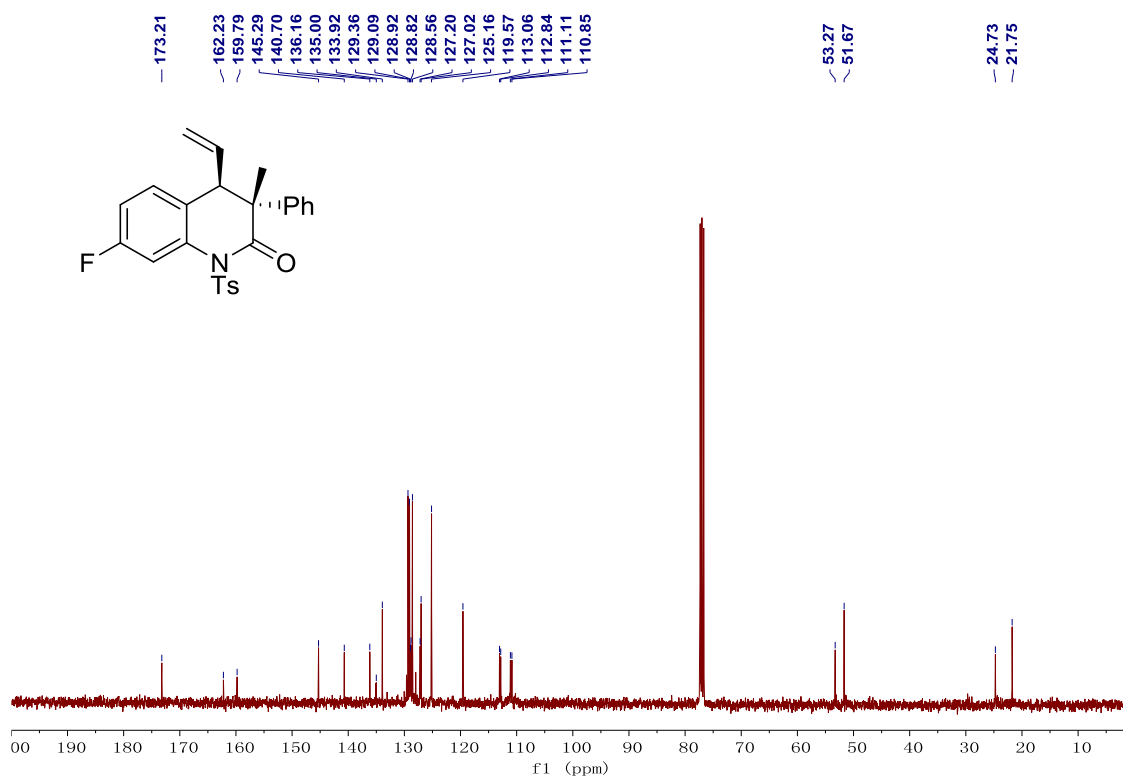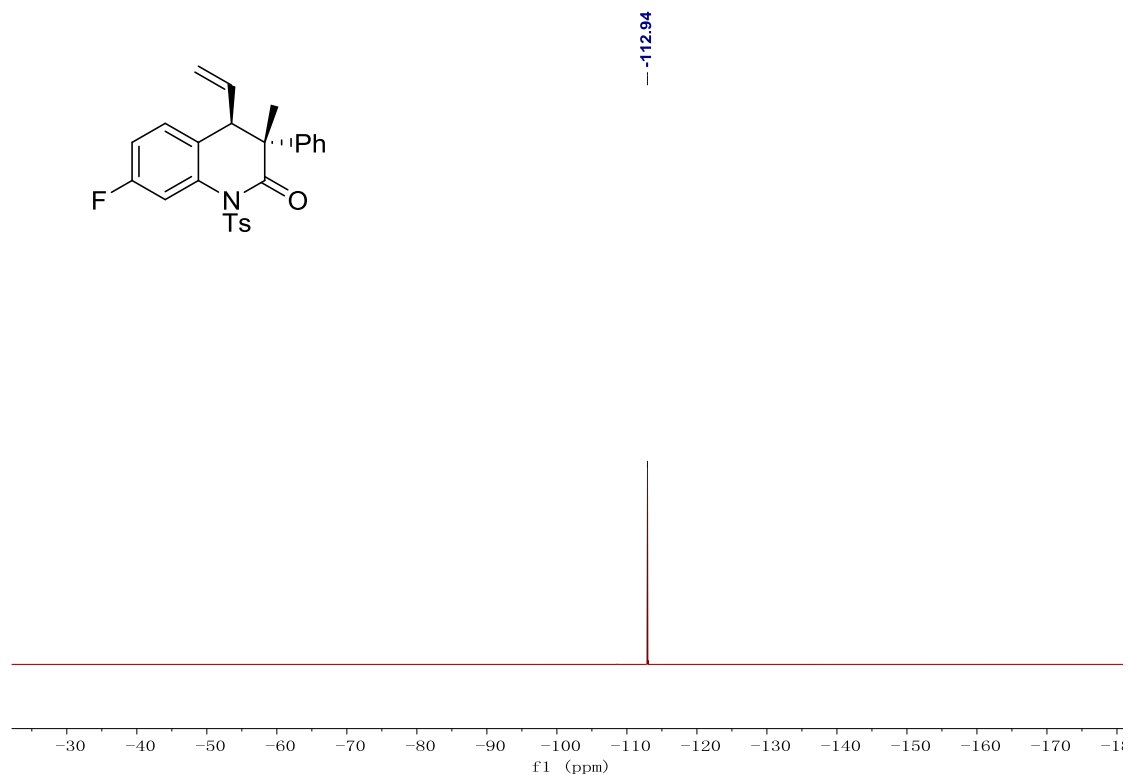

Supplementary Figure 12. <sup>1</sup>H and <sup>13</sup>C NMR <sup>19</sup>F NMR of compound 3ca

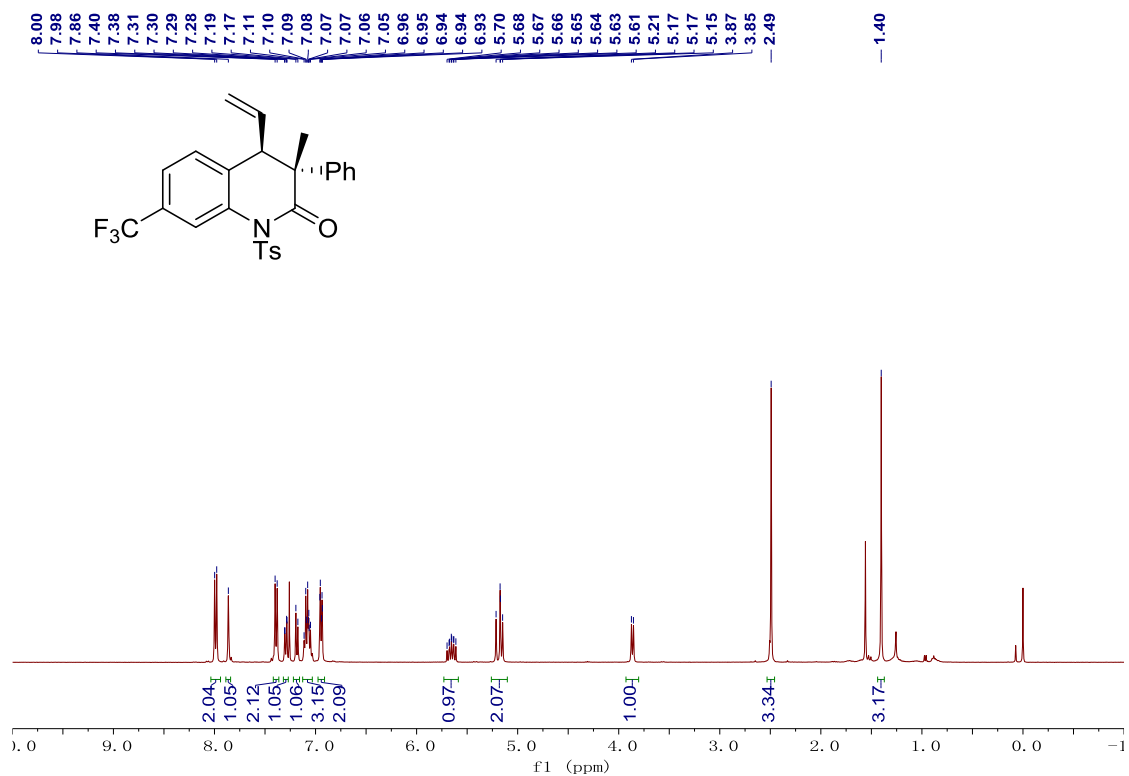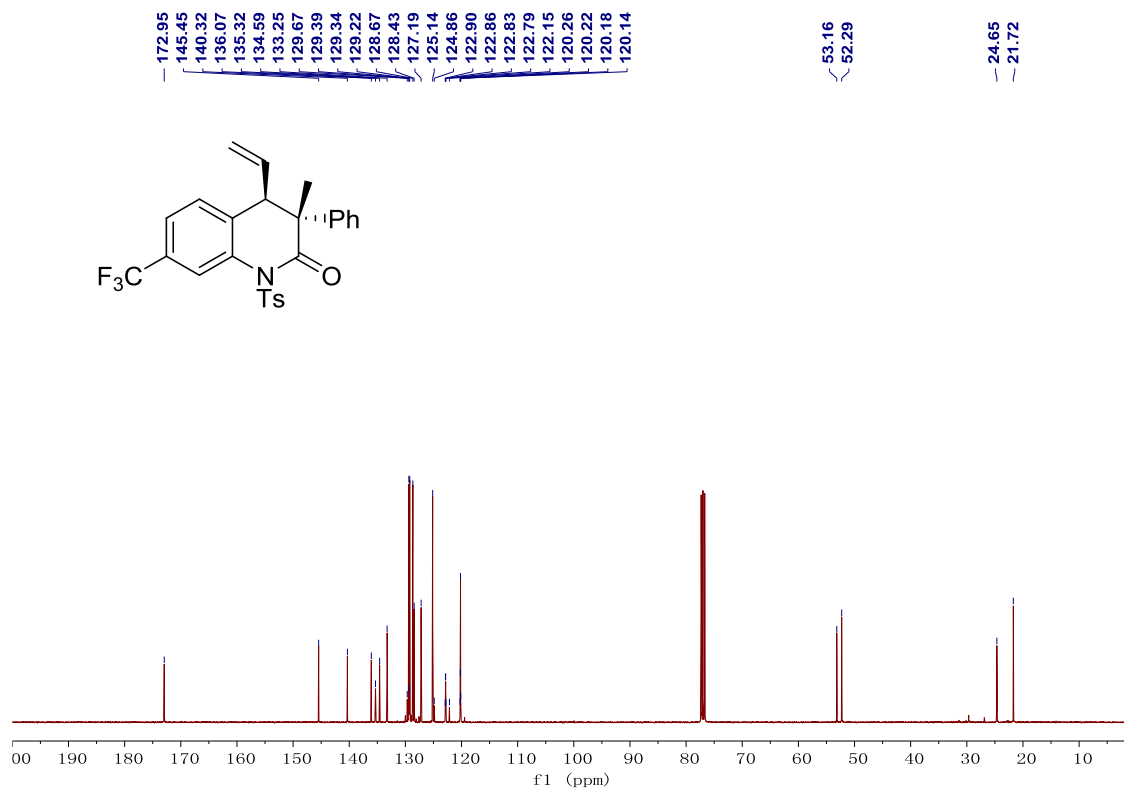



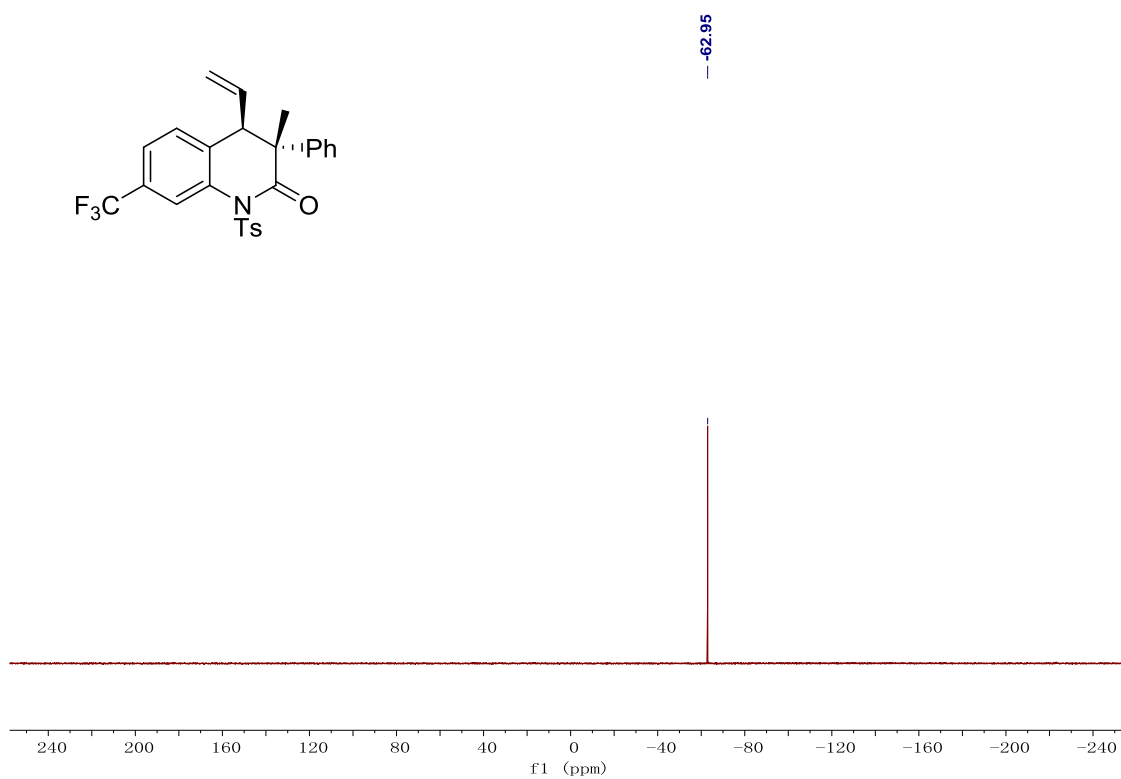

Supplementary Figure 13.  $^1\text{H}$  and  $^{13}\text{C}$  NMR  $^{19}\text{F}$  NMR of compound 3da

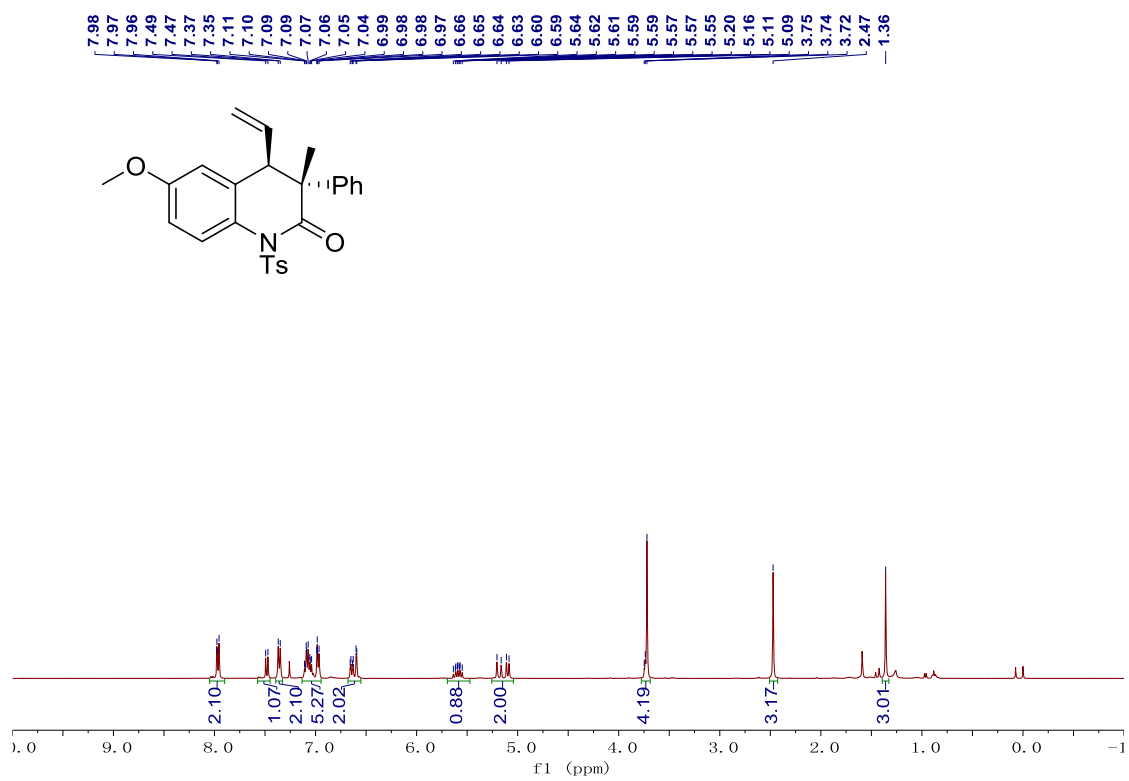

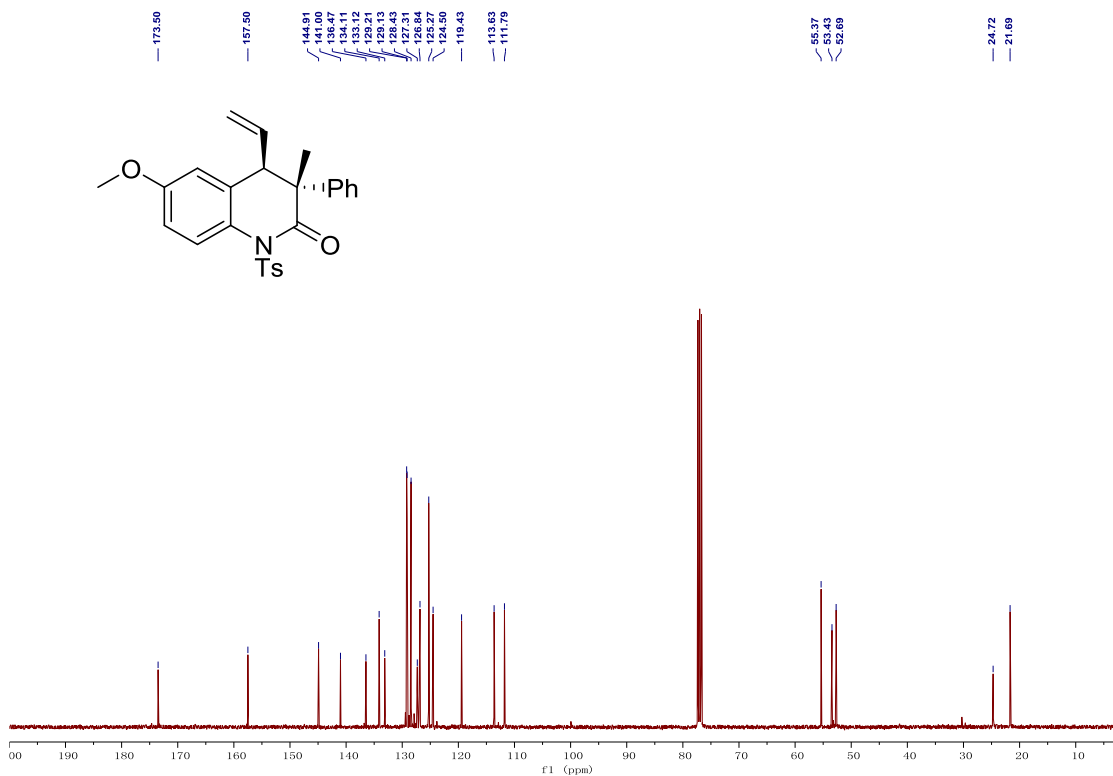

Supplementary Figure 14.  $^1\text{H}$  and  $^{13}\text{C}$  NMR of compound 3ea

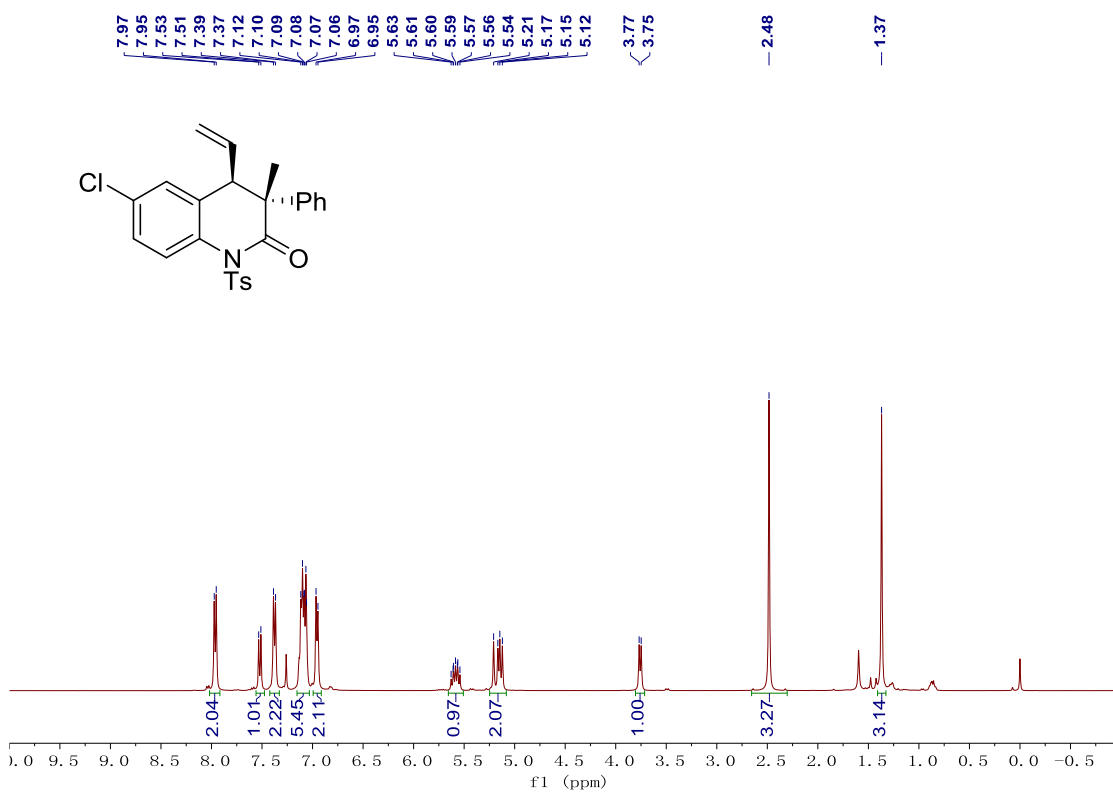

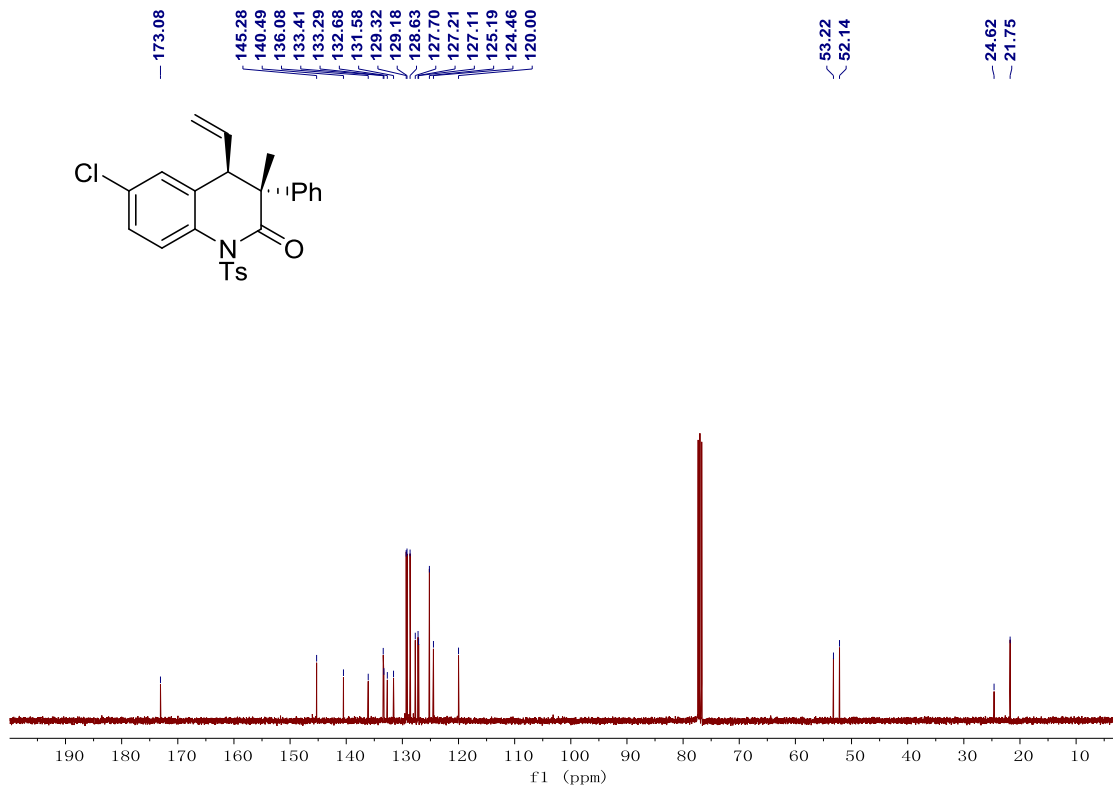

Supplementary Figure 15. <sup>1</sup>H and <sup>13</sup>C NMR of compound 3fa

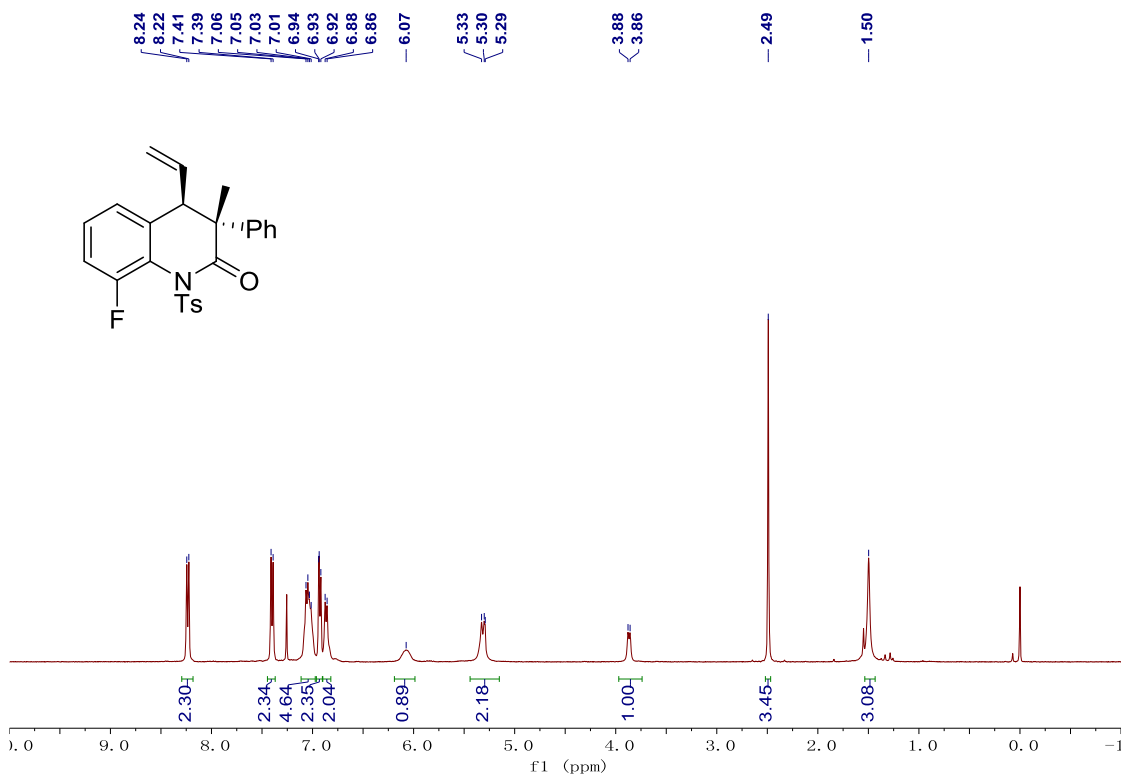

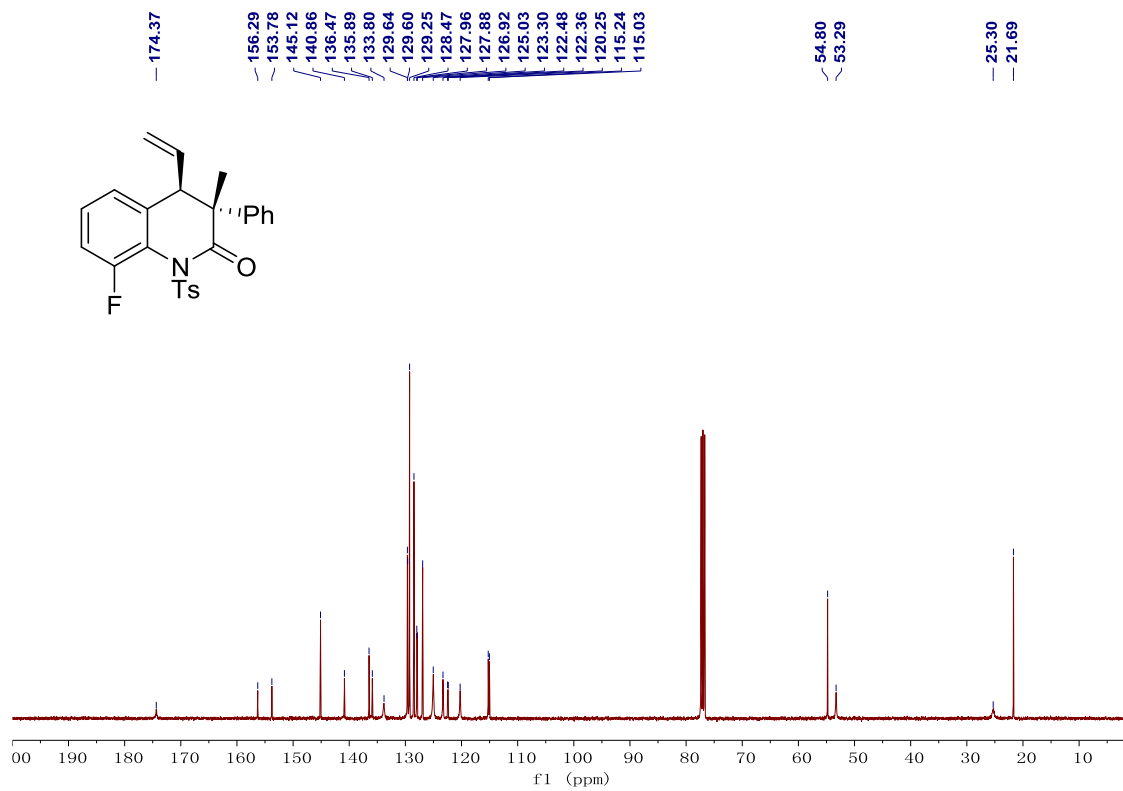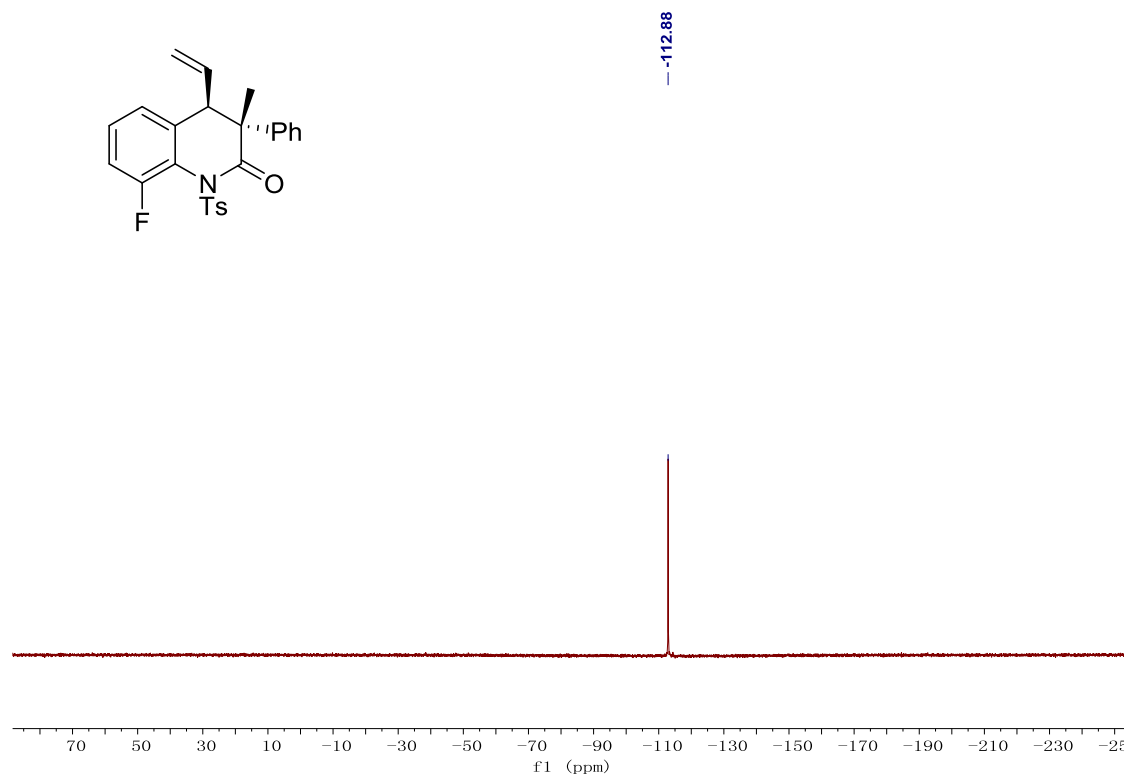

Supplementary Figure 16.  $^1\text{H}$  and  $^{13}\text{C}$  NMR  $^{19}\text{F}$  NMR of compound 3ga

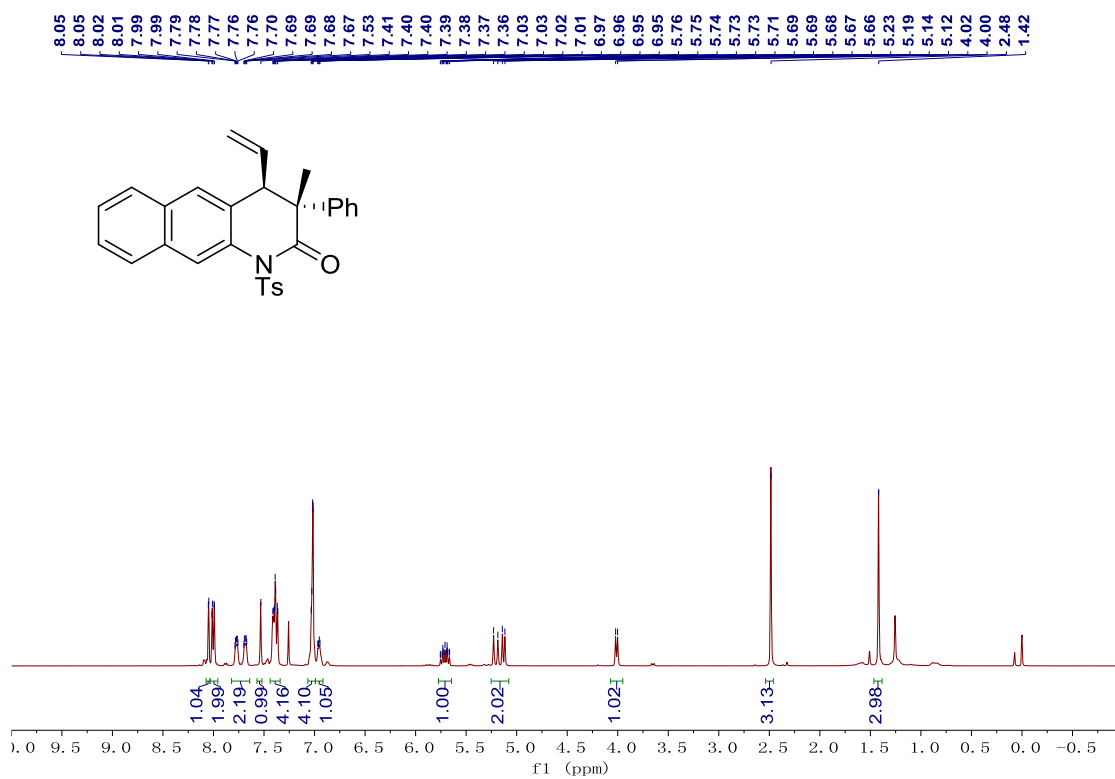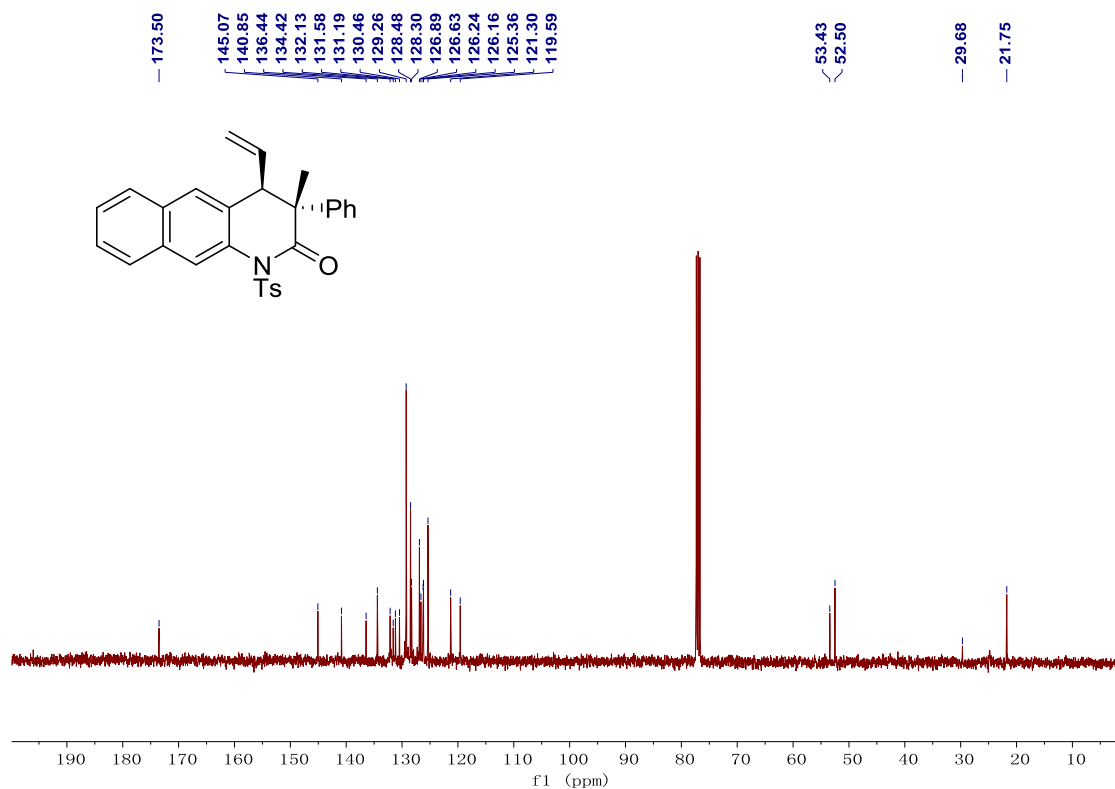

Supplementary Figure 17.  $^1\text{H}$  and  $^{13}\text{C}$  NMR of compound 3ha

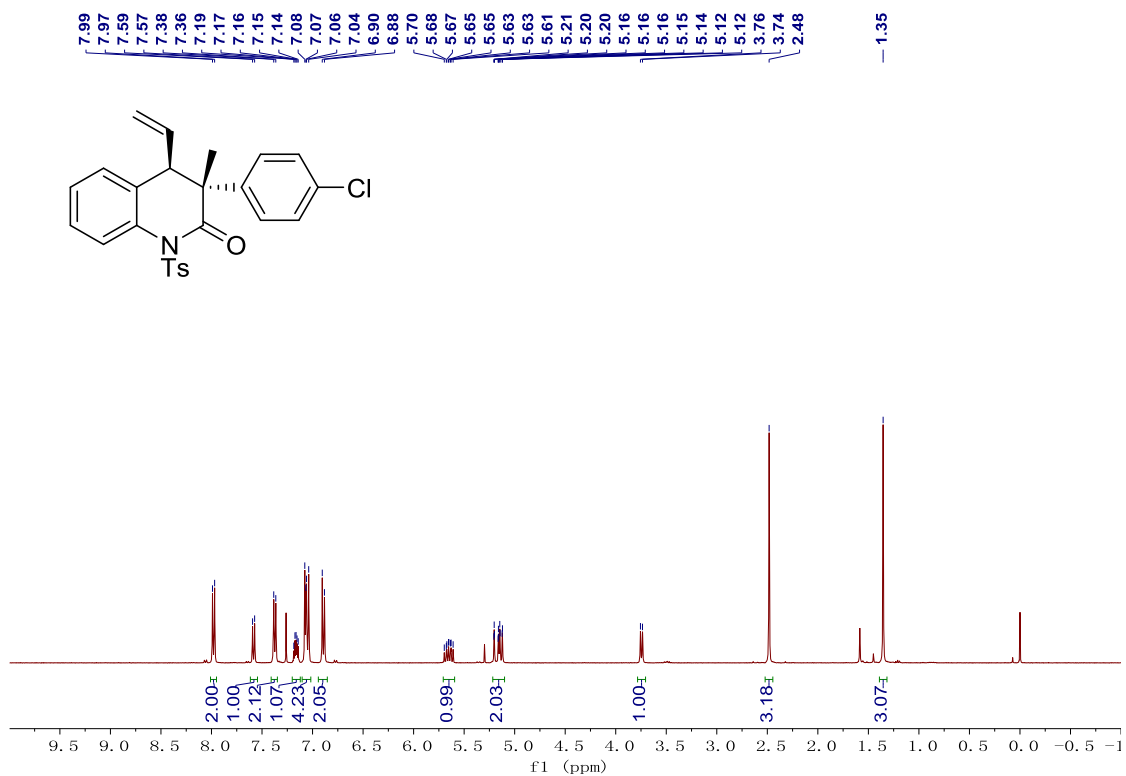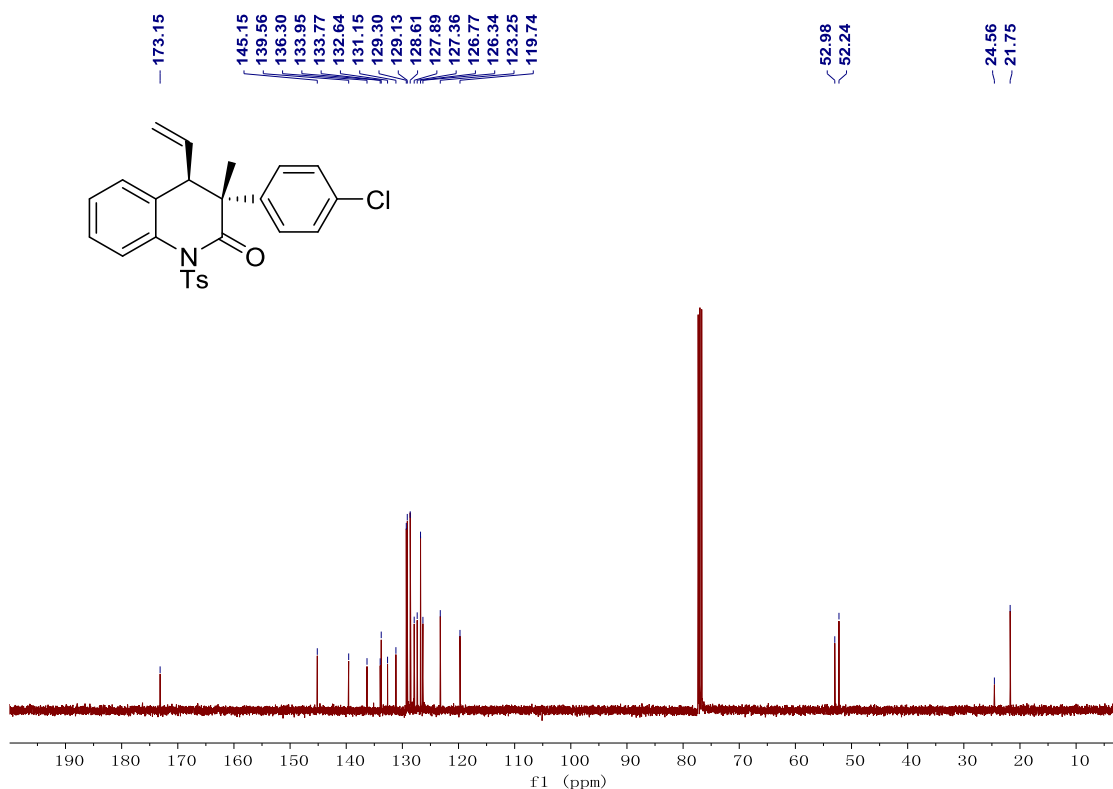

Supplementary Figure 18. <sup>1</sup>H and <sup>13</sup>C NMR of compound 3ab

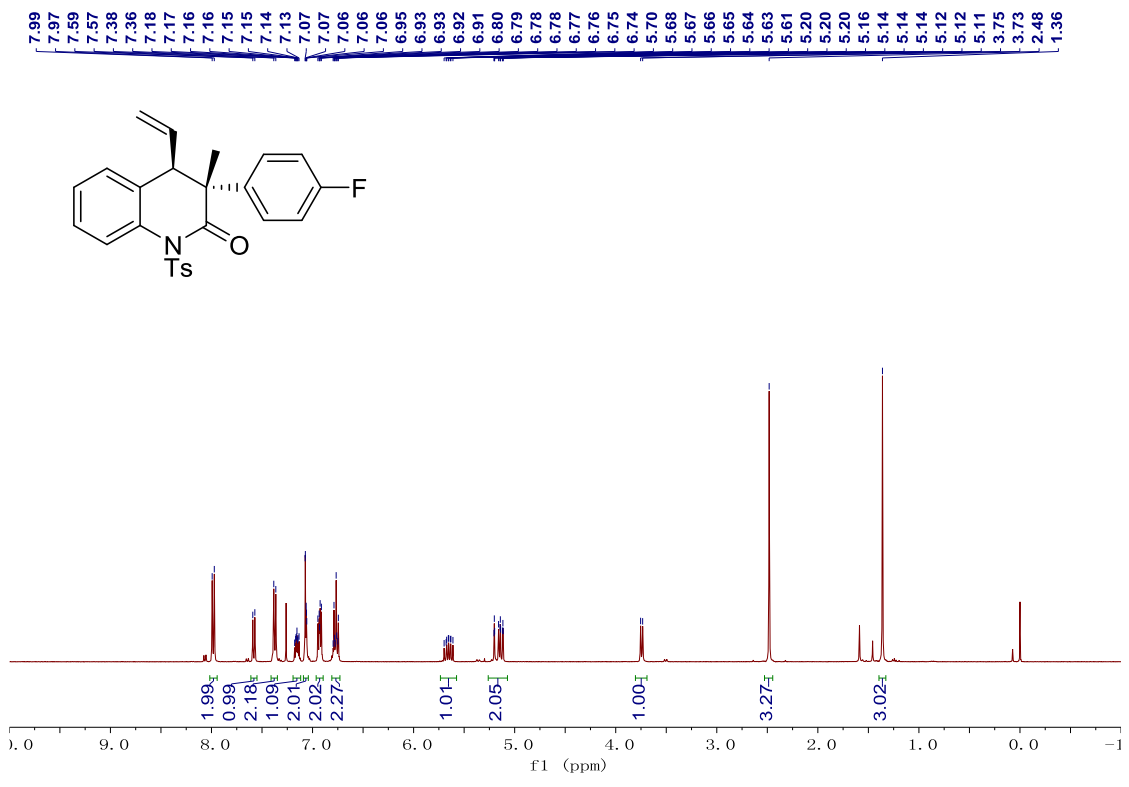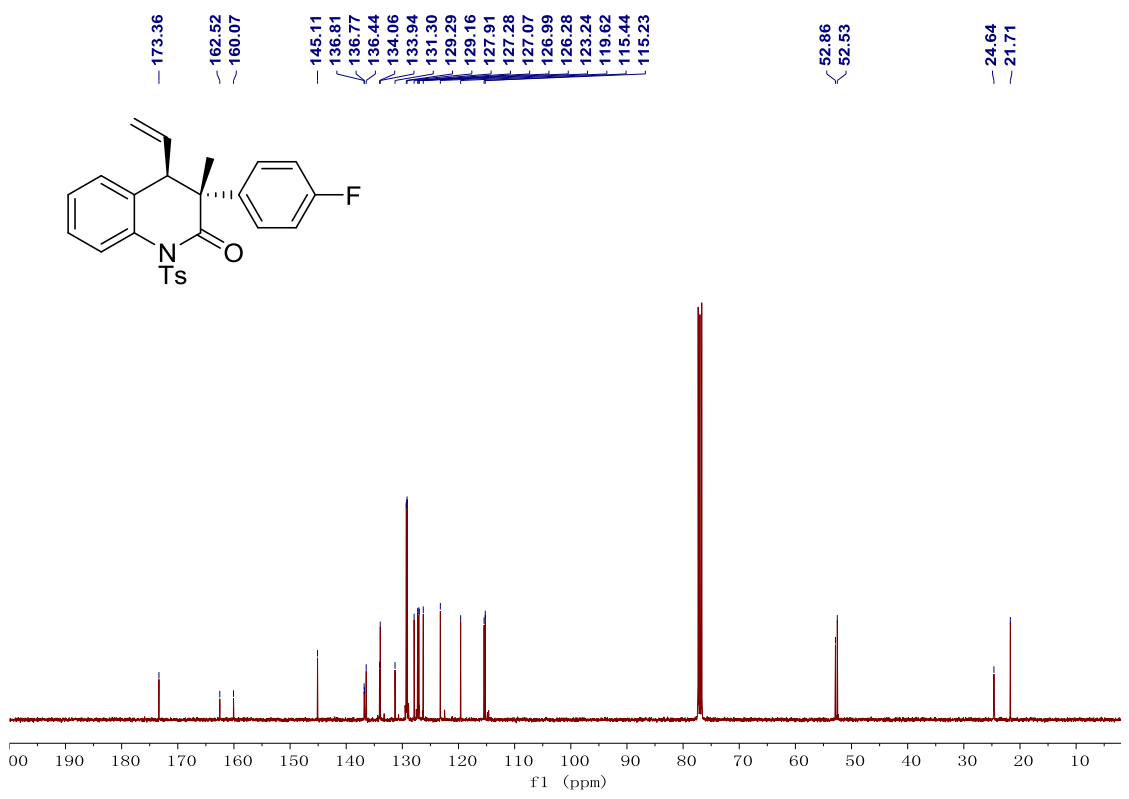

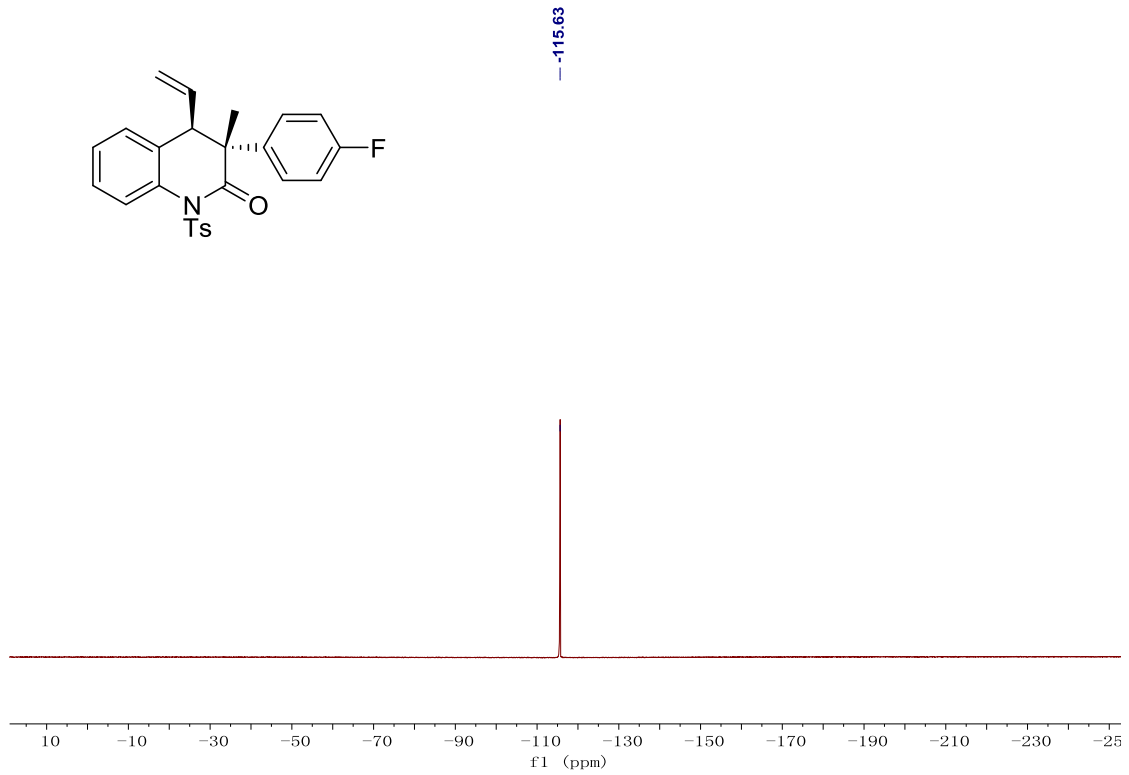

Supplementary Figure 19.  $^1\text{H}$  and  $^{13}\text{C}$  NMR  $^{19}\text{F}$  NMR of compound 3ac

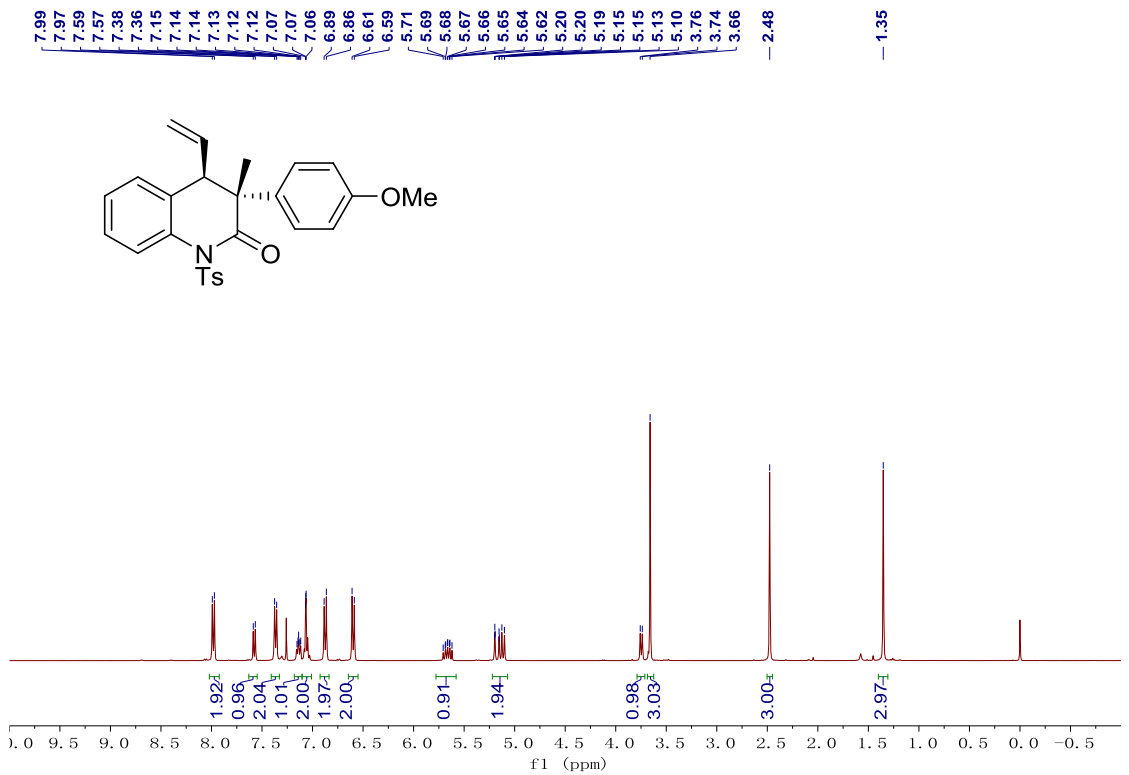



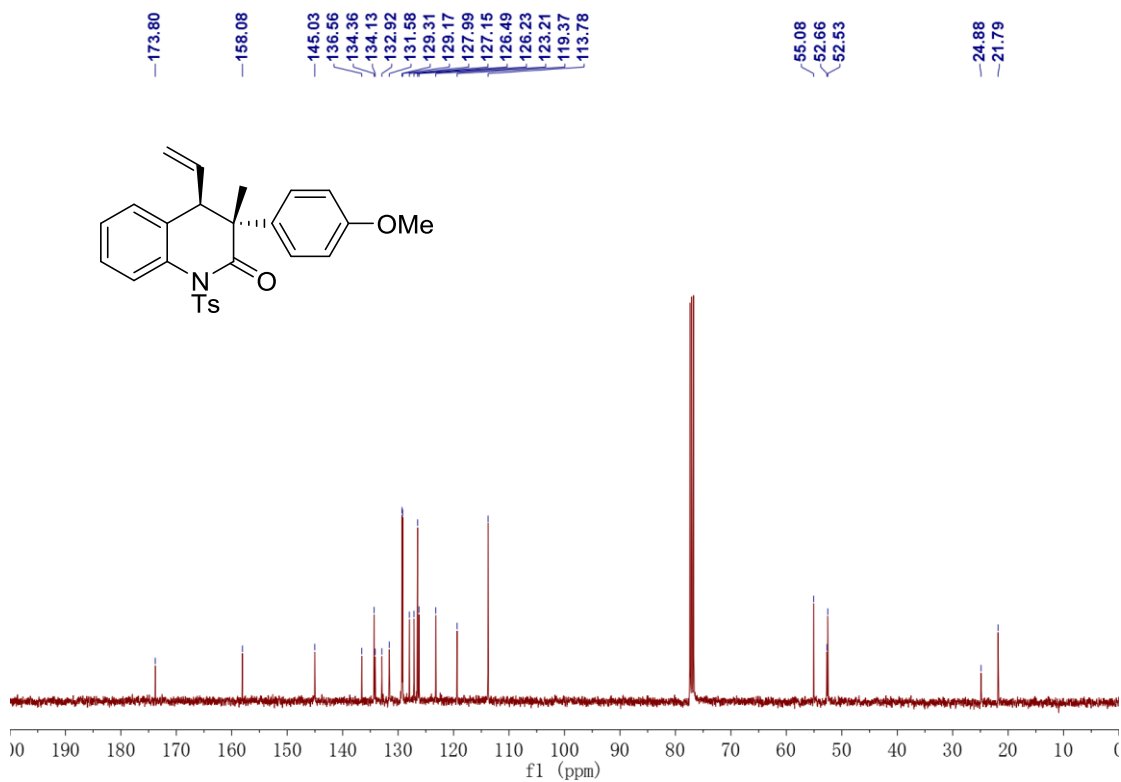

Supplementary Figure 20.  $^1\text{H}$  and  $^{13}\text{C}$  NMR of compound 3ad

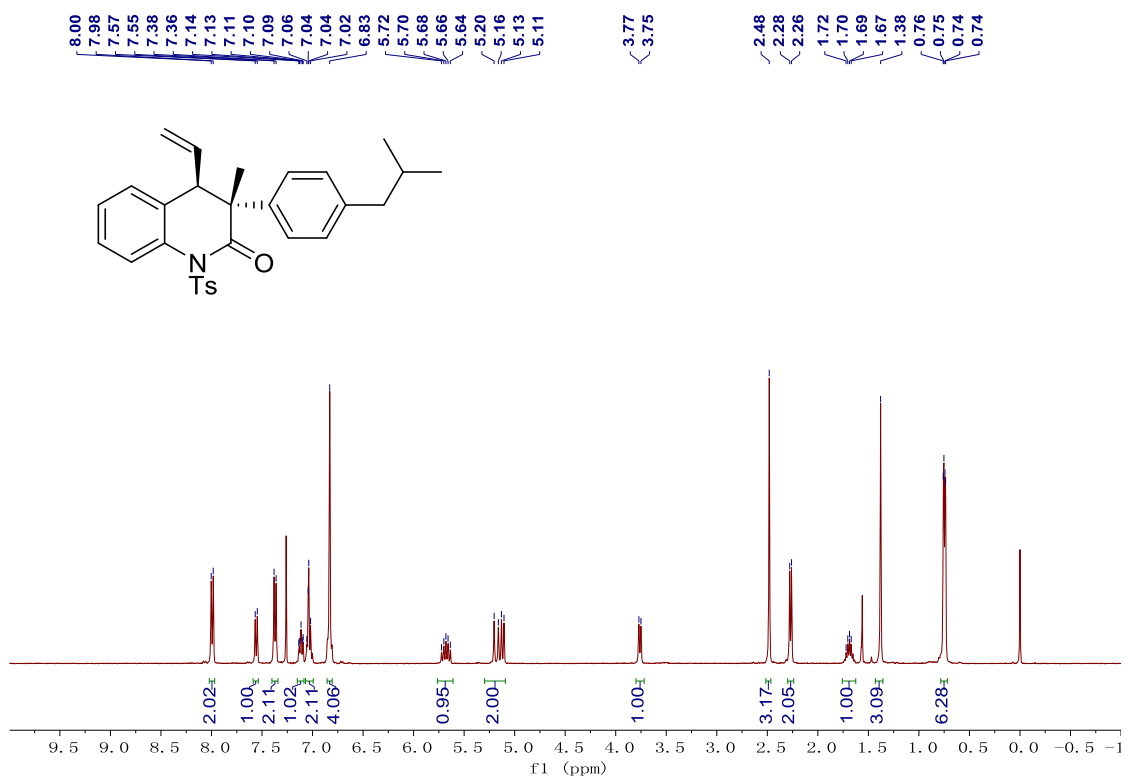

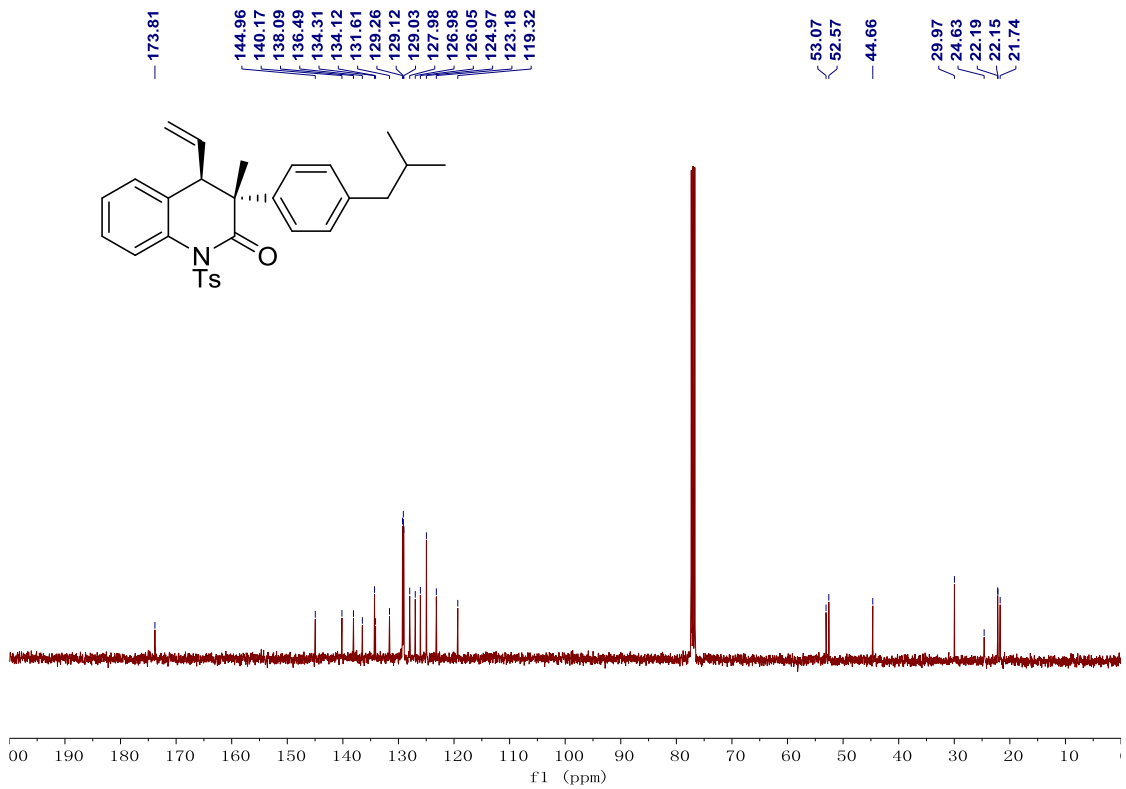

Supplementary Figure 21. <sup>1</sup>H and <sup>13</sup>C NMR of compound 3ae

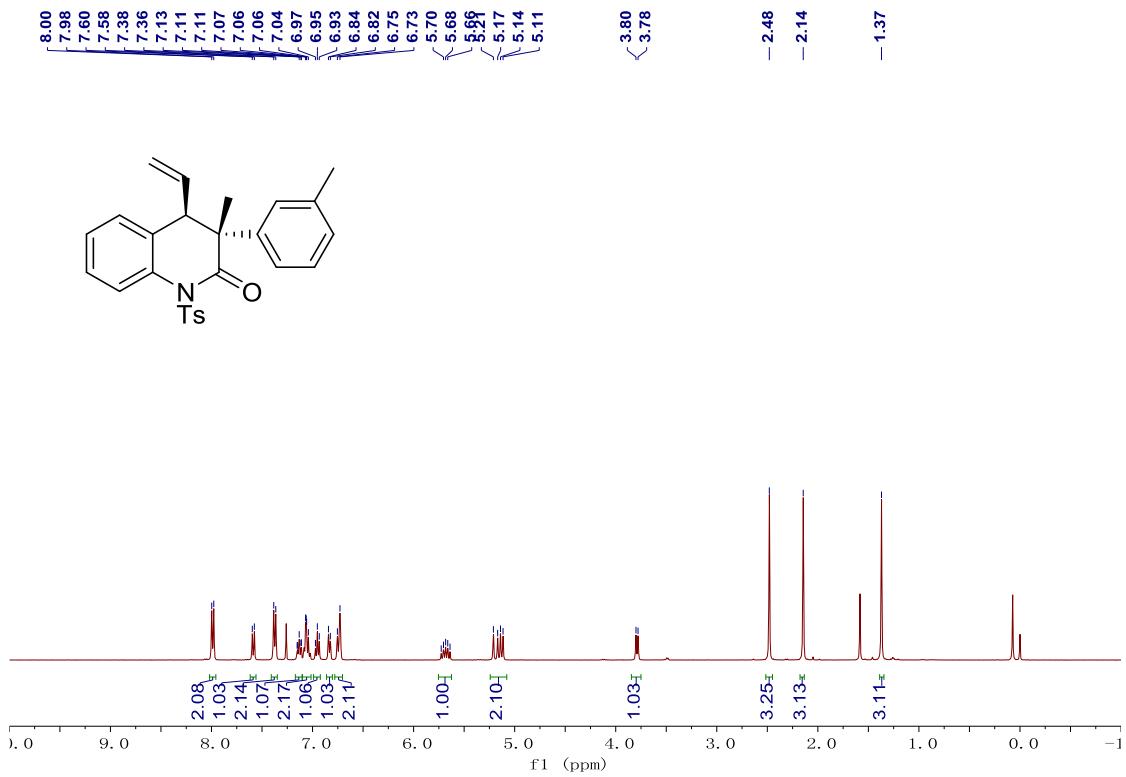

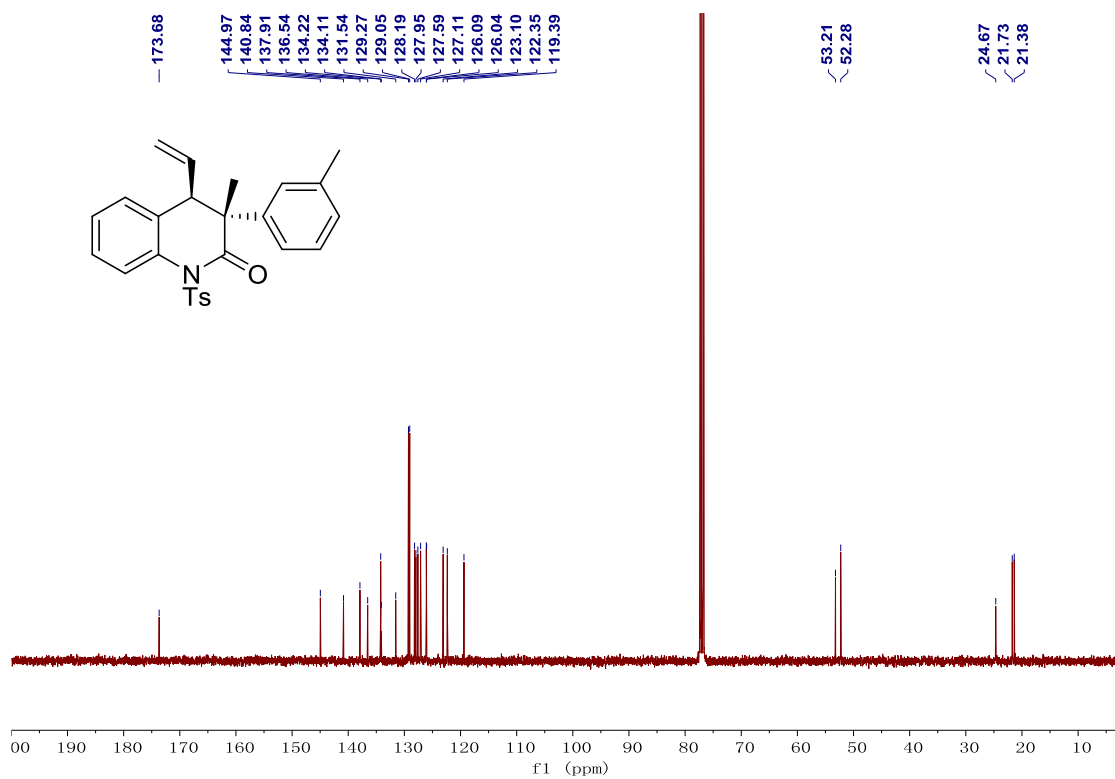

Supplementary Figure 22.  $^1\text{H}$  and  $^{13}\text{C}$  NMR of compound 3af

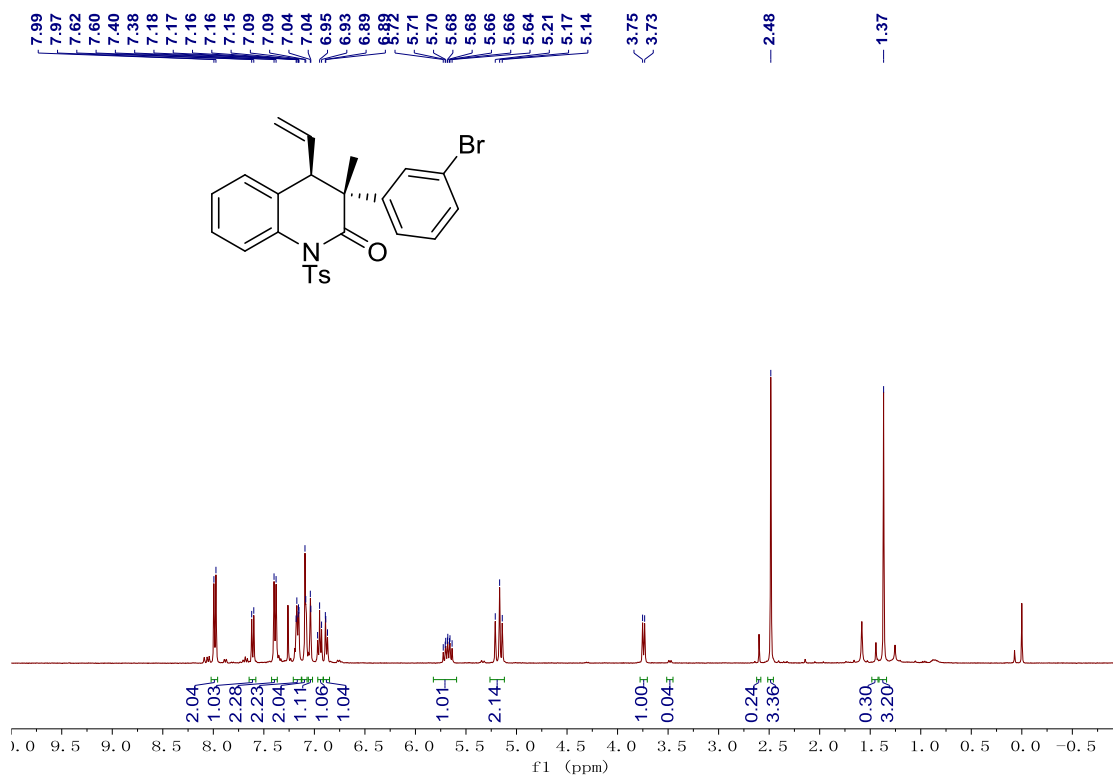

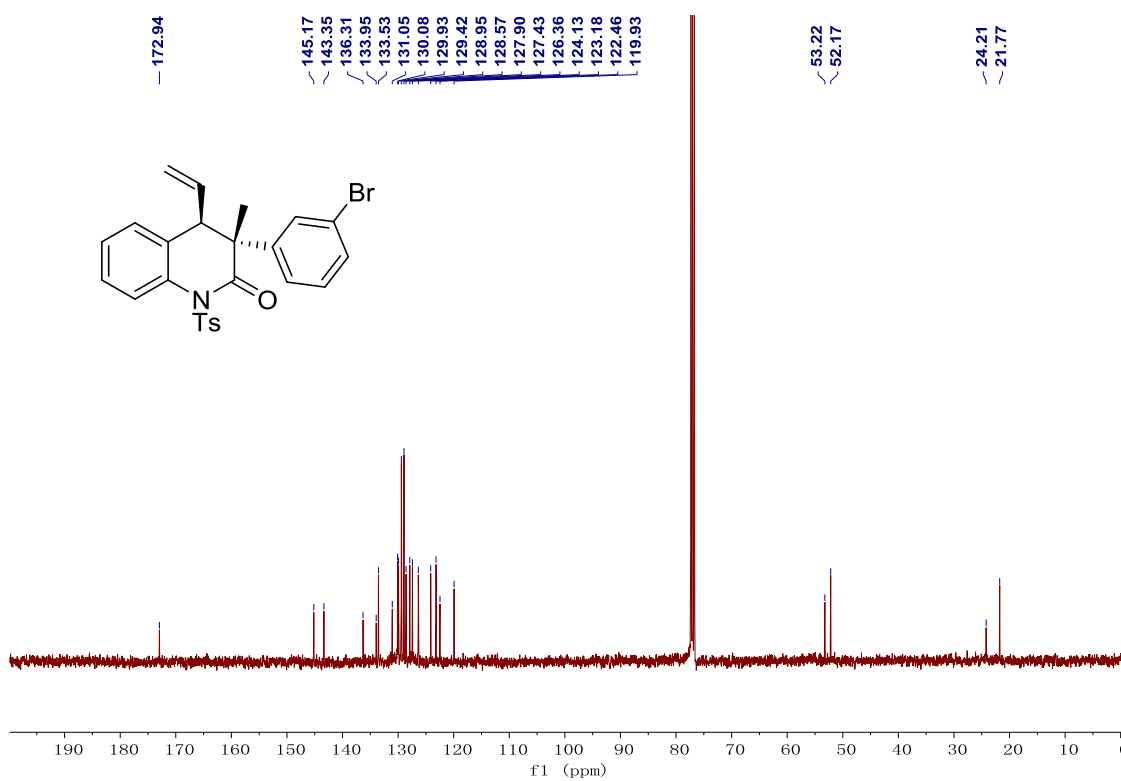

Supplementary Figure 23. <sup>1</sup>H and <sup>13</sup>C NMR of compound 3ag

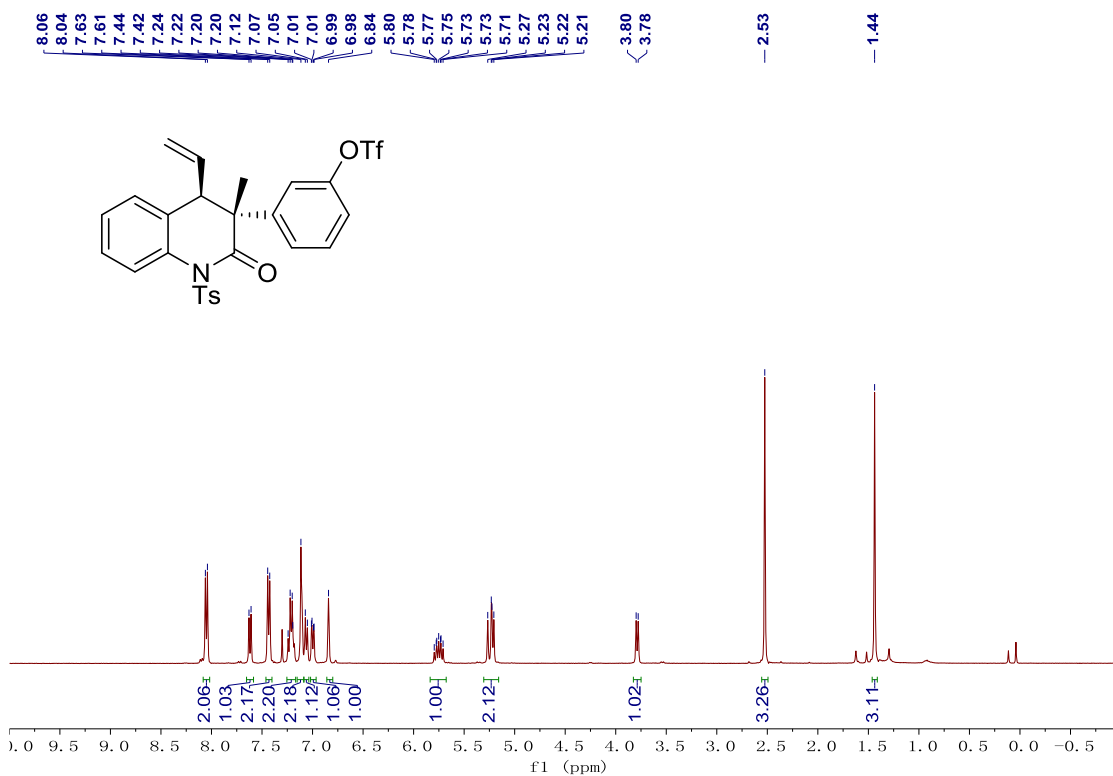

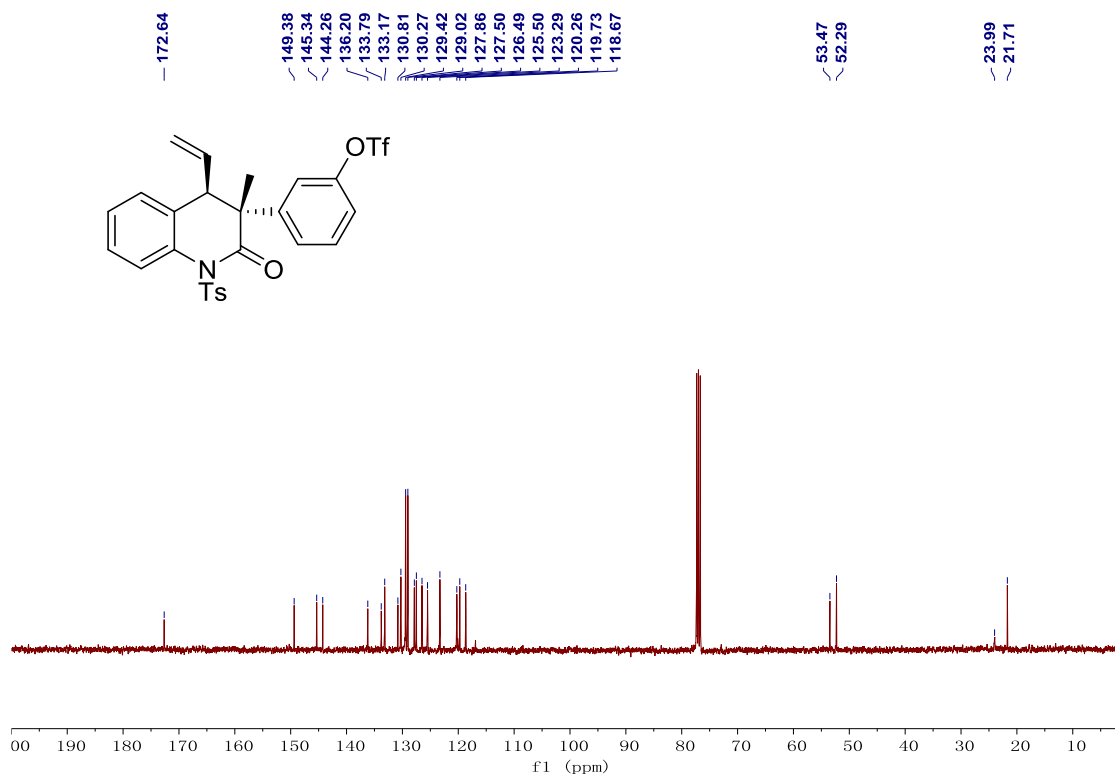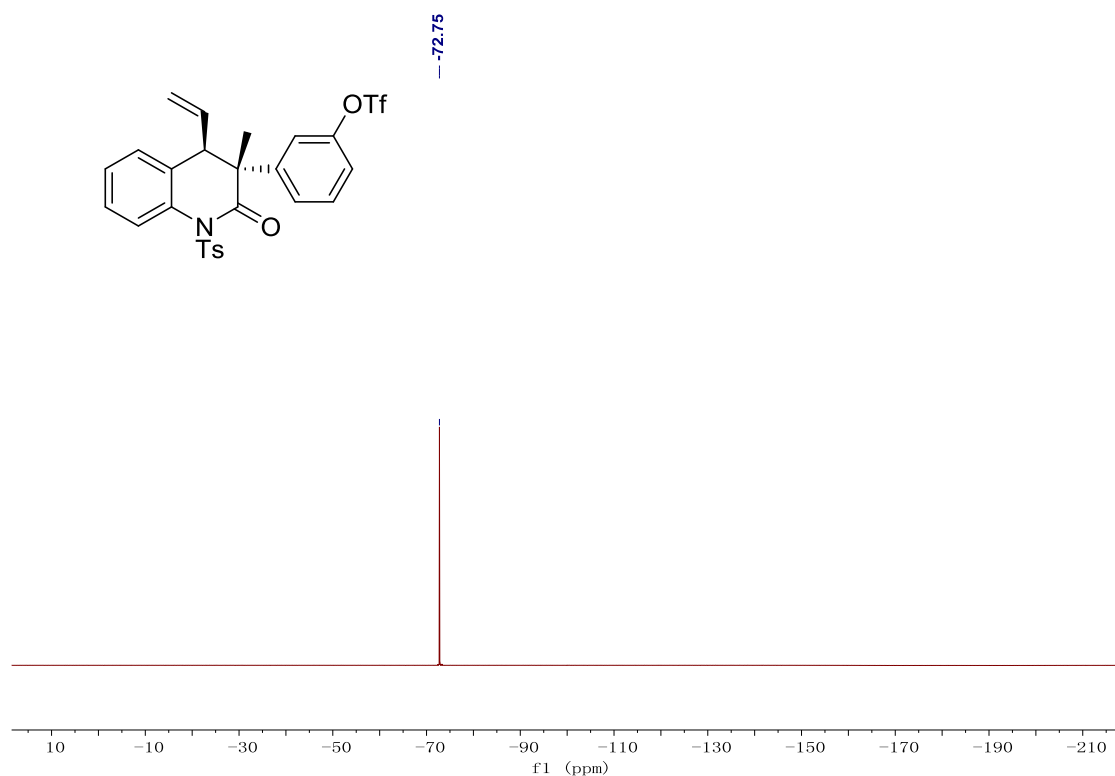

Supplementary Figure 24.  $^1\text{H}$  and  $^{13}\text{C}$  NMR  $^{19}\text{F}$  NMR of compound **3ah**

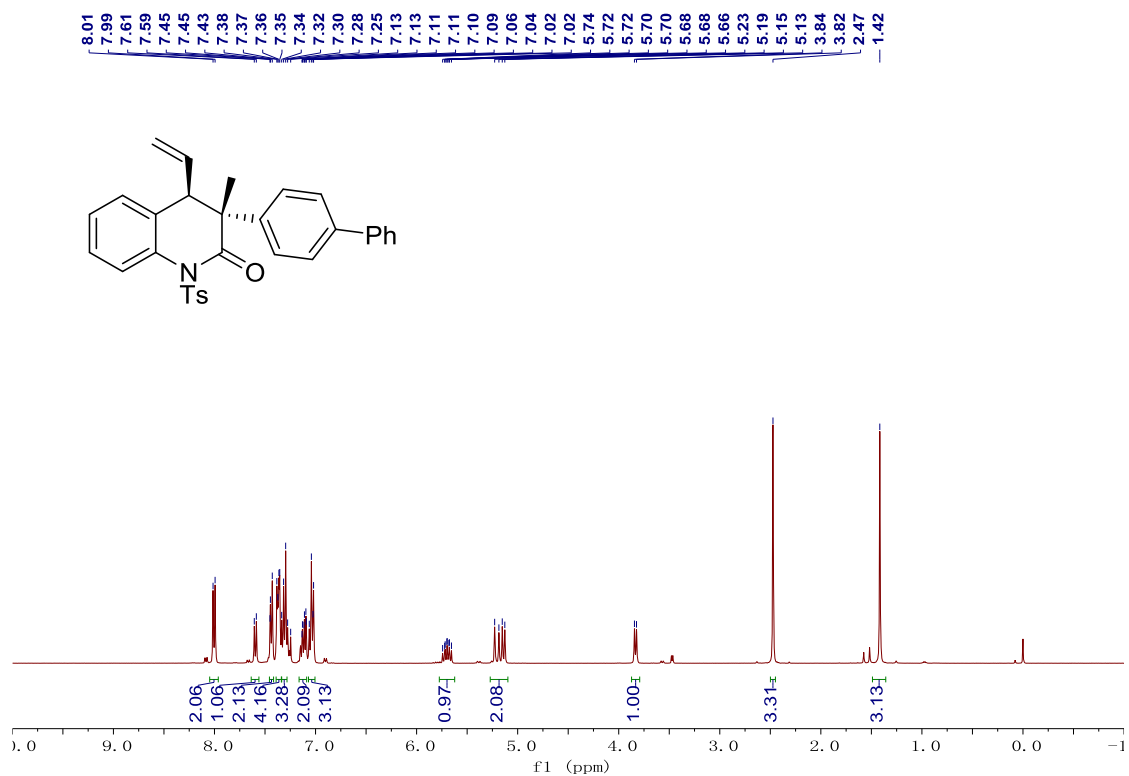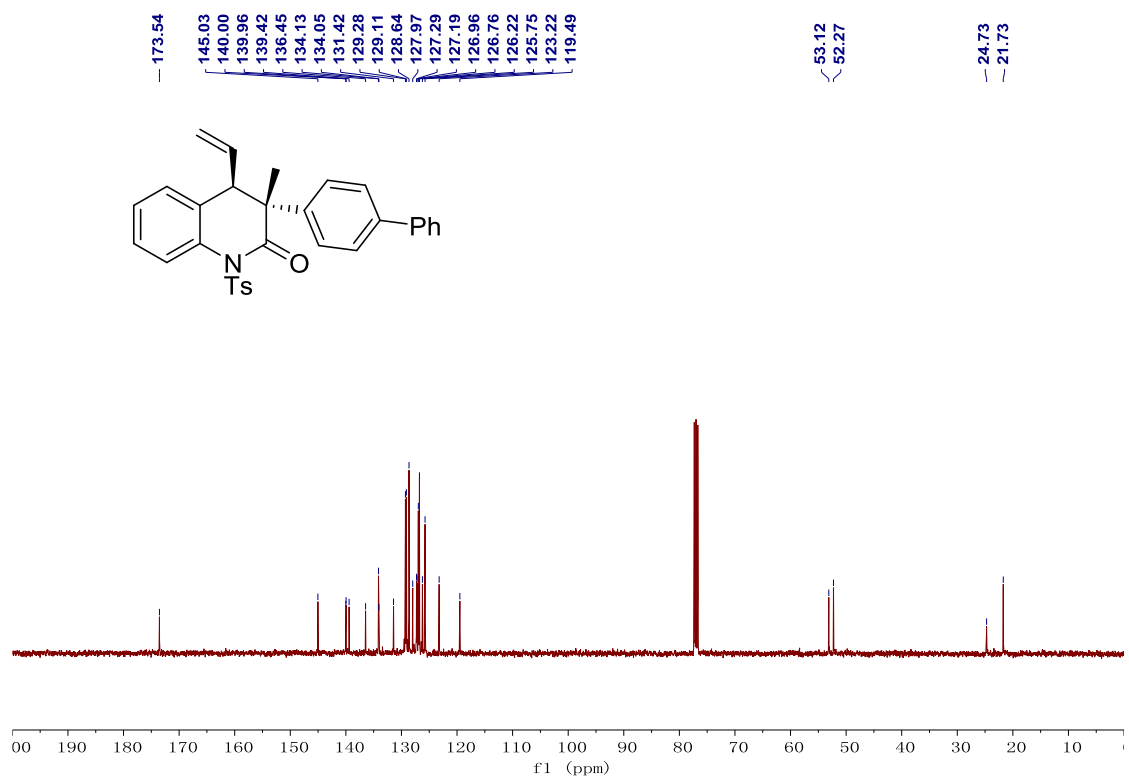

Supplementary Figure 25. <sup>1</sup>H and <sup>13</sup>C NMR of compound 3ai

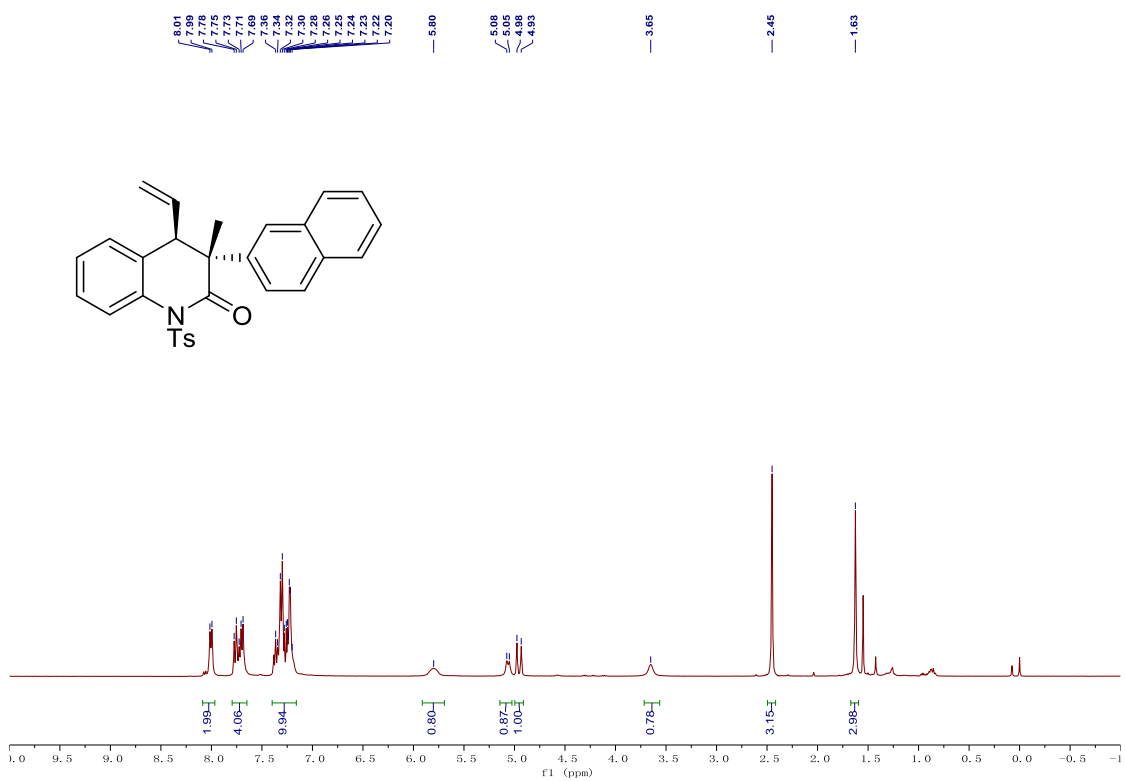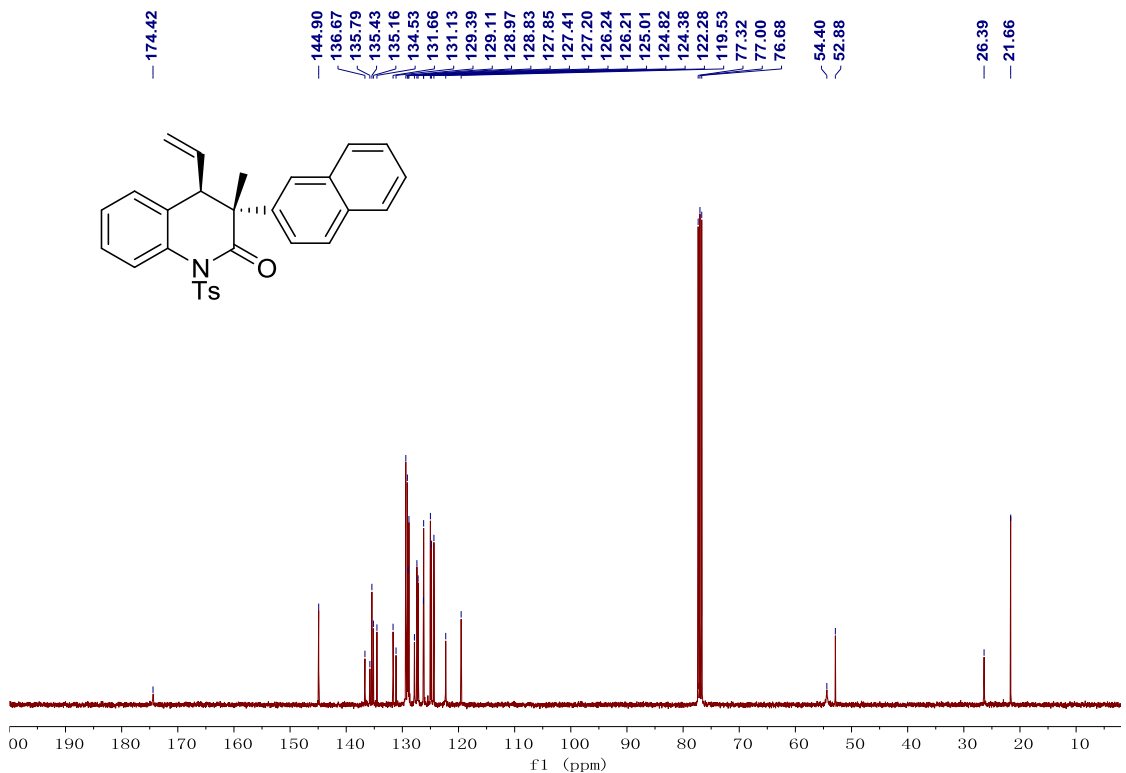

Supplementary Figure 26.  $^1\text{H}$  and  $^{13}\text{C}$  NMR of compound 3aj

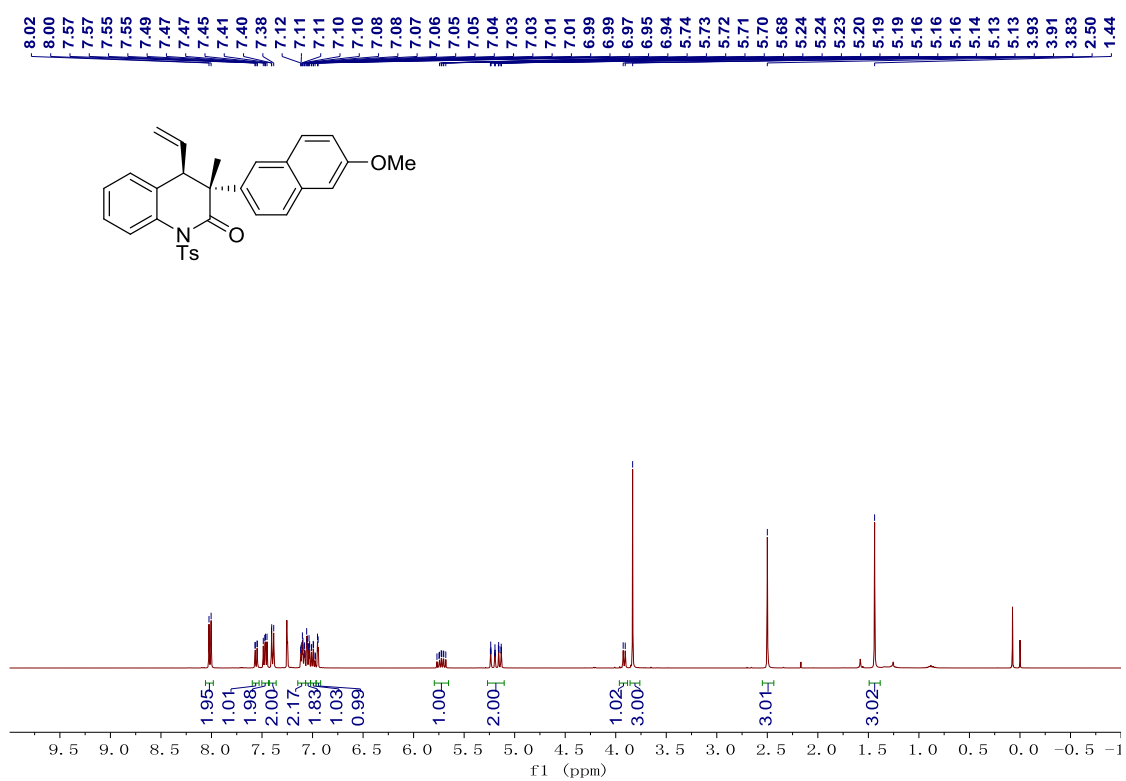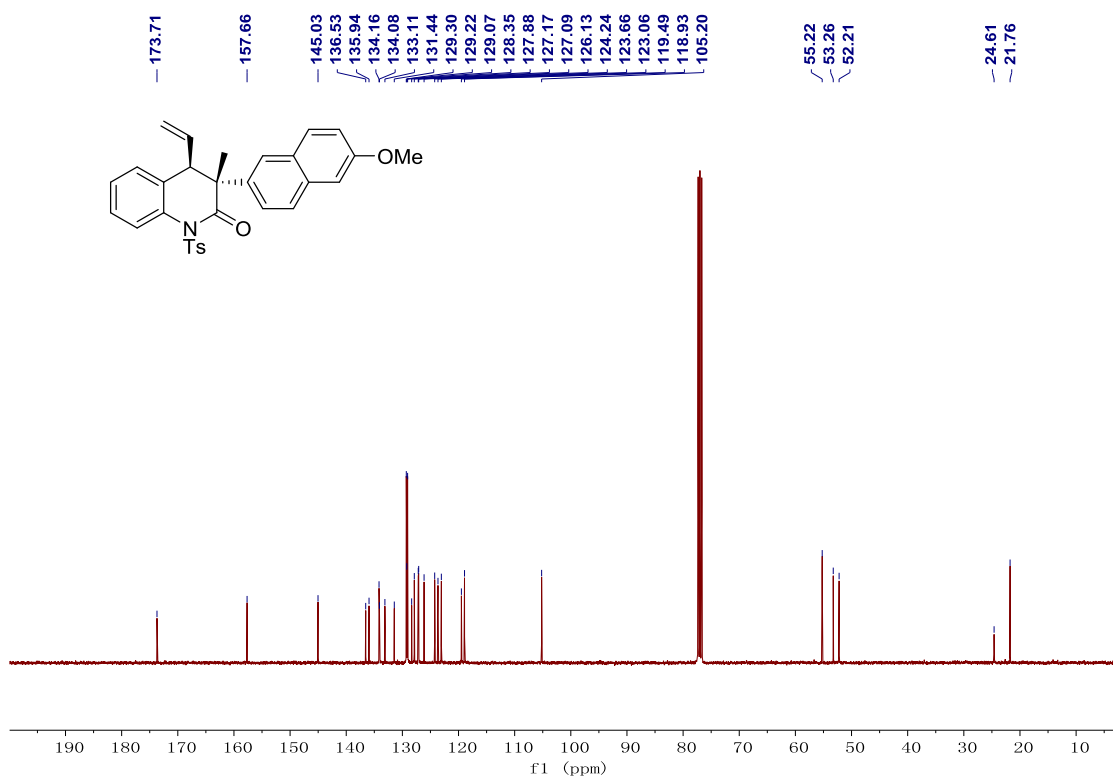

Supplementary Figure 27. <sup>1</sup>H and <sup>13</sup>C NMR of compound 3ak



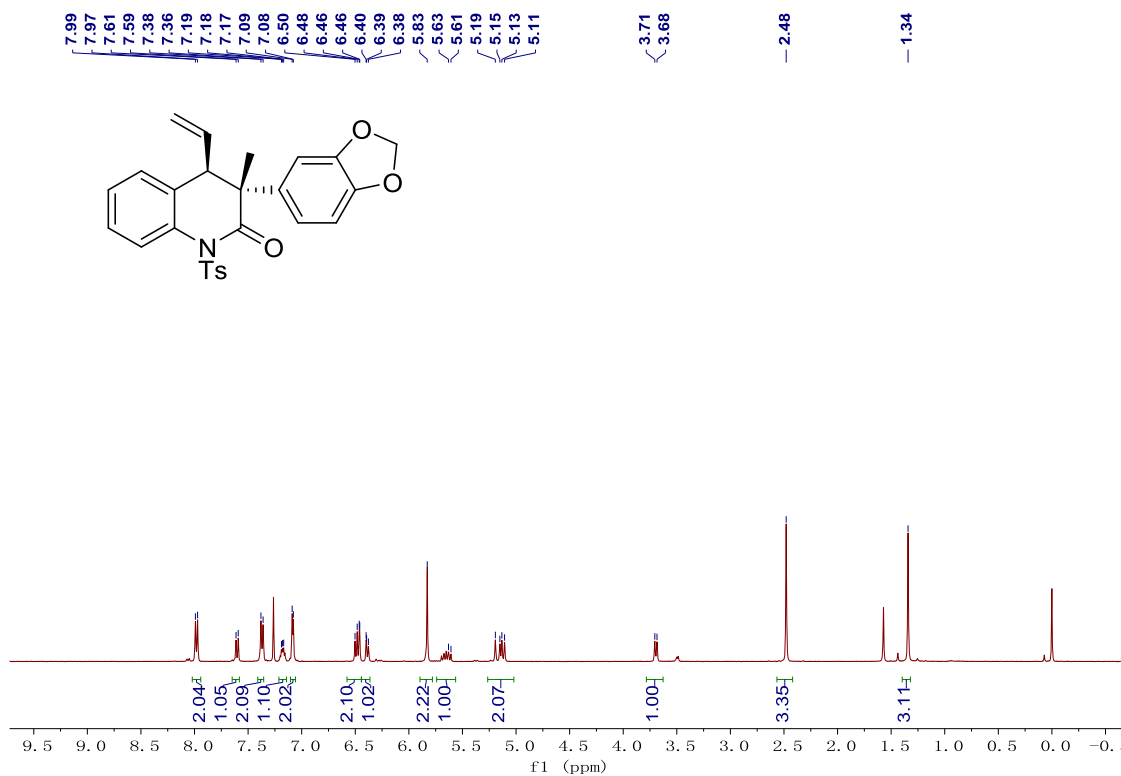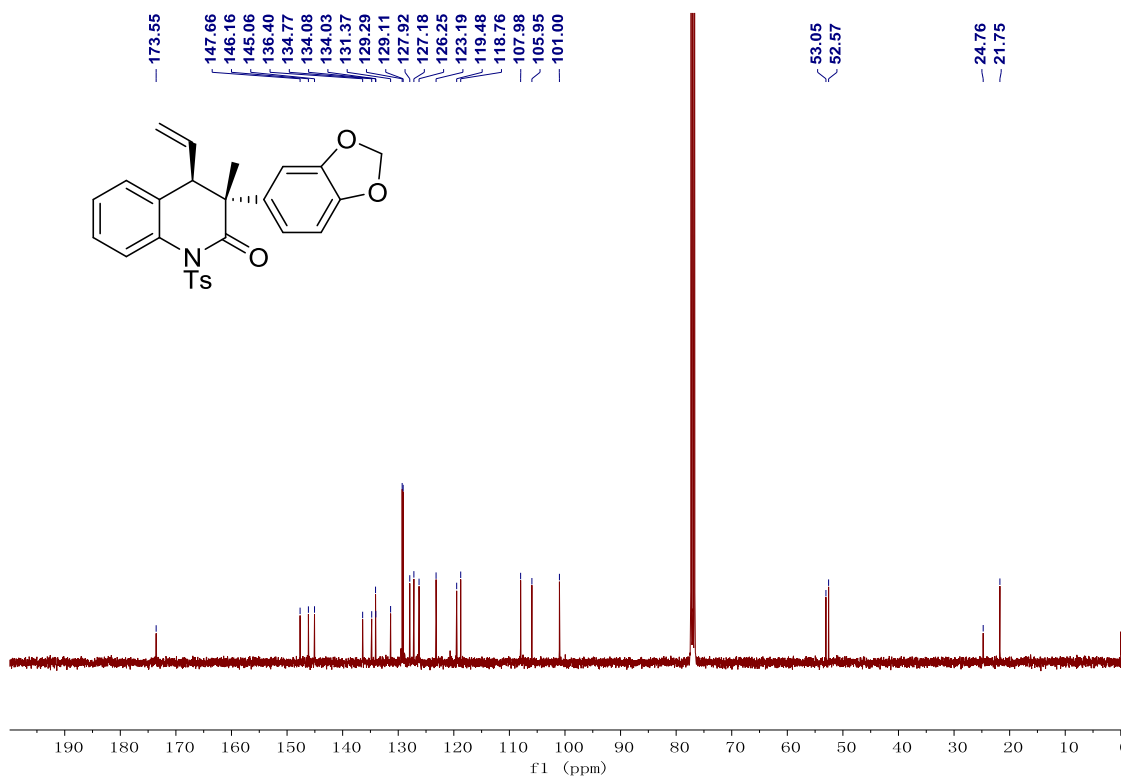

**Supplementary Figure 28.** <sup>1</sup>H and <sup>13</sup>C NMR of compound 3al

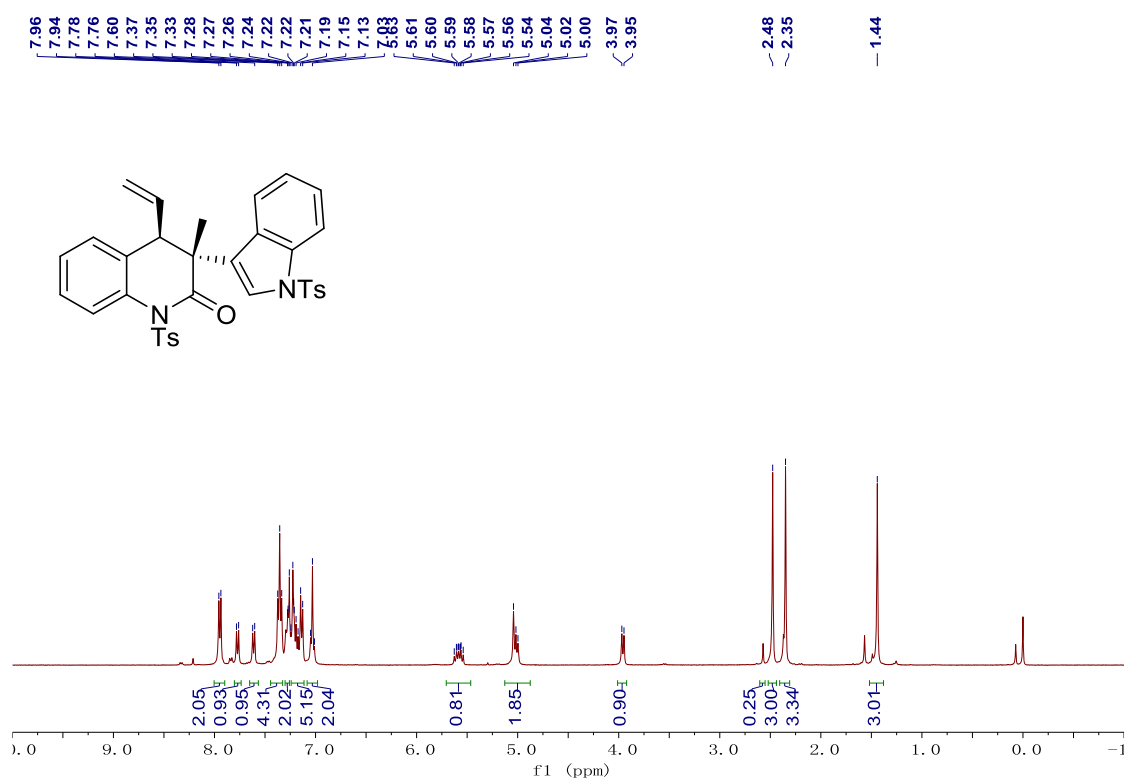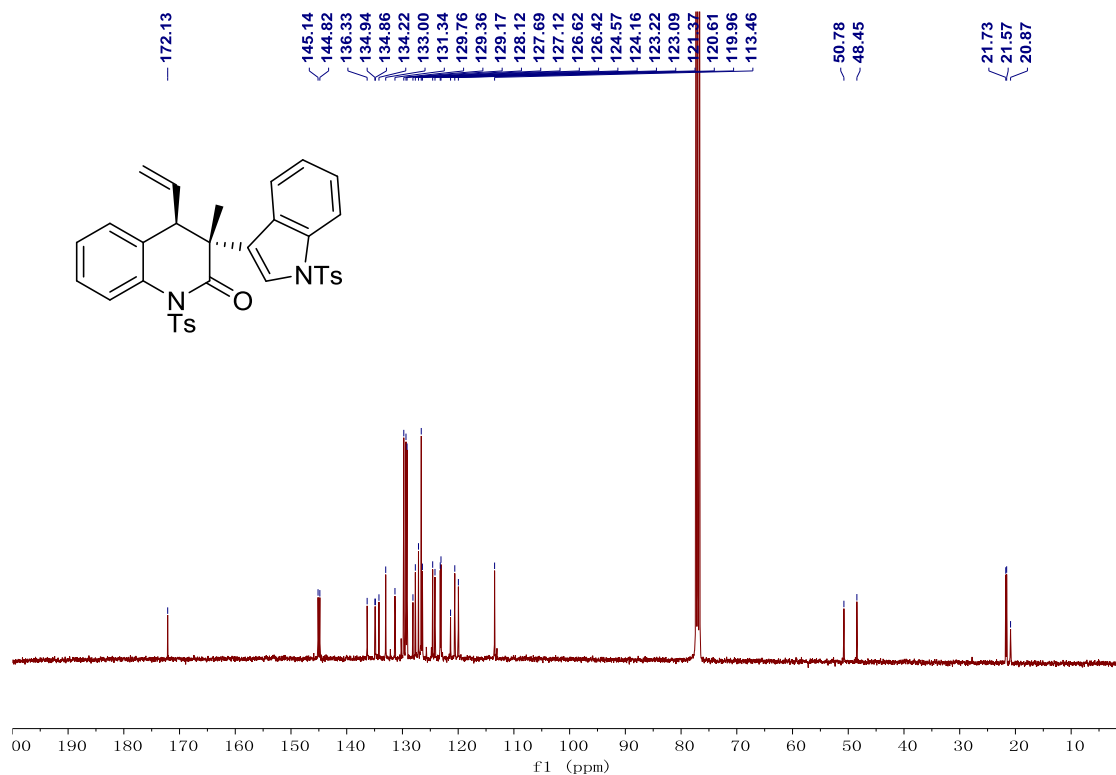

Supplementary Figure 29. <sup>1</sup>H and <sup>13</sup>C NMR of compound 3am

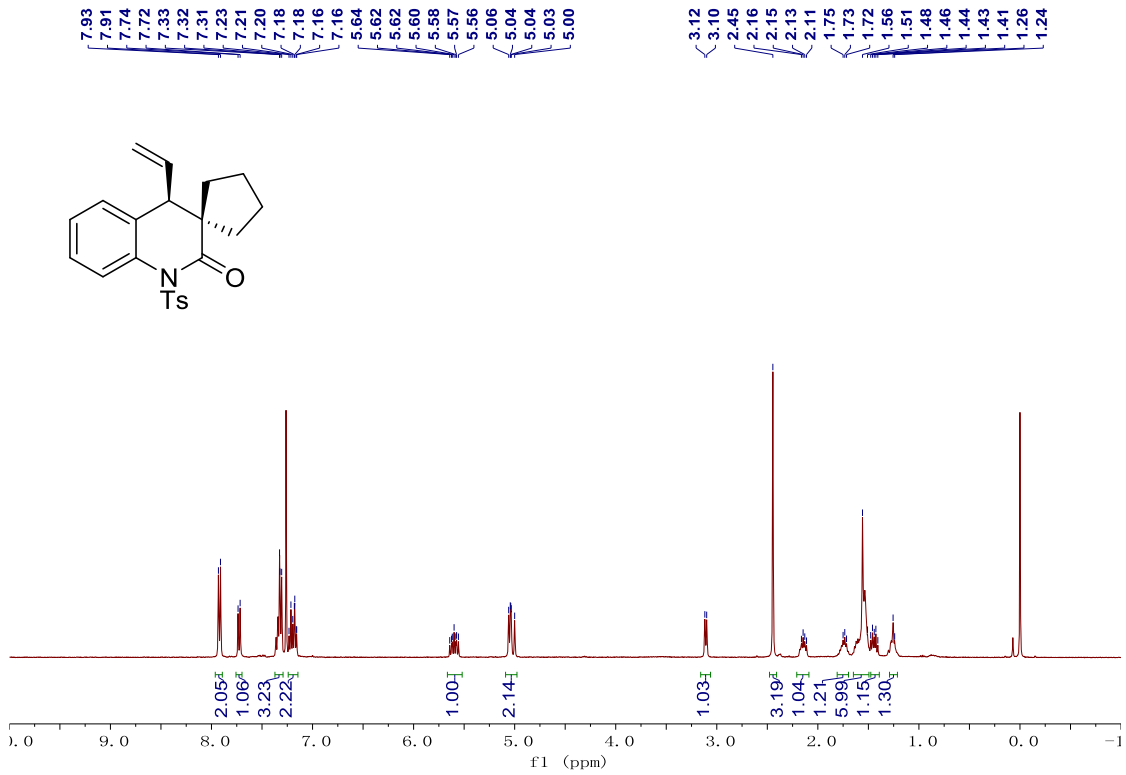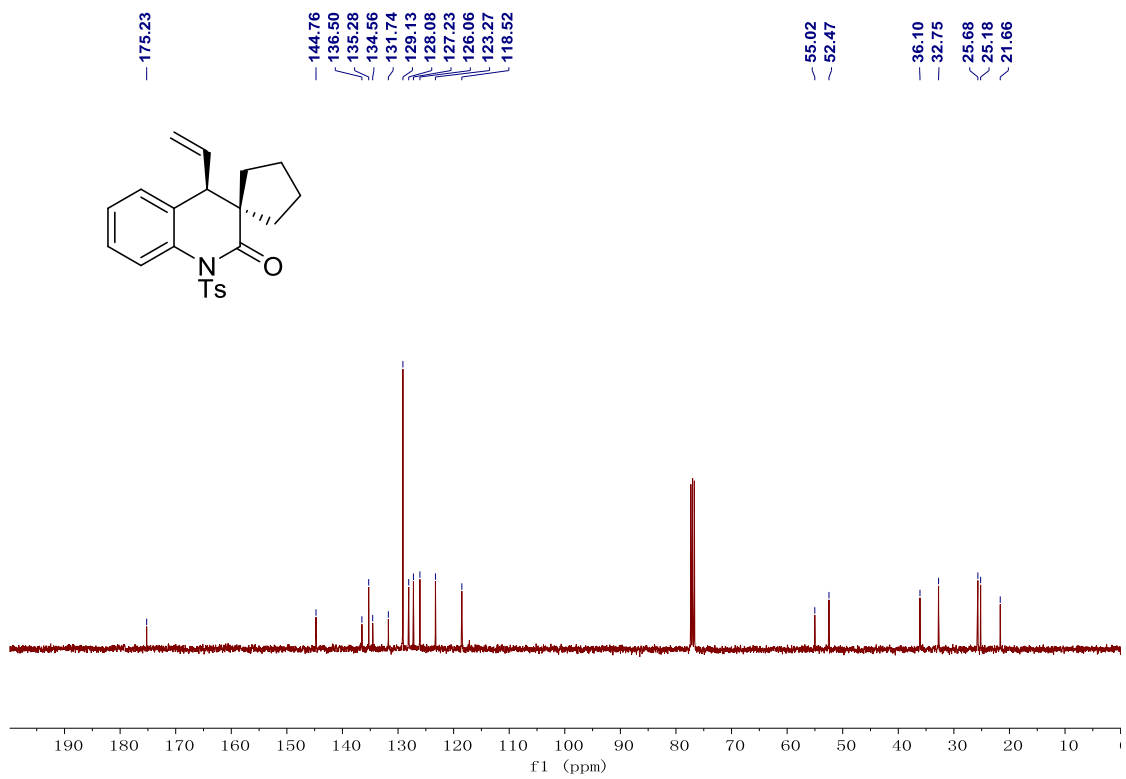

Supplementary Figure30. <sup>1</sup>H and <sup>13</sup>C NMR <sup>19</sup>F NMR of compound 3an

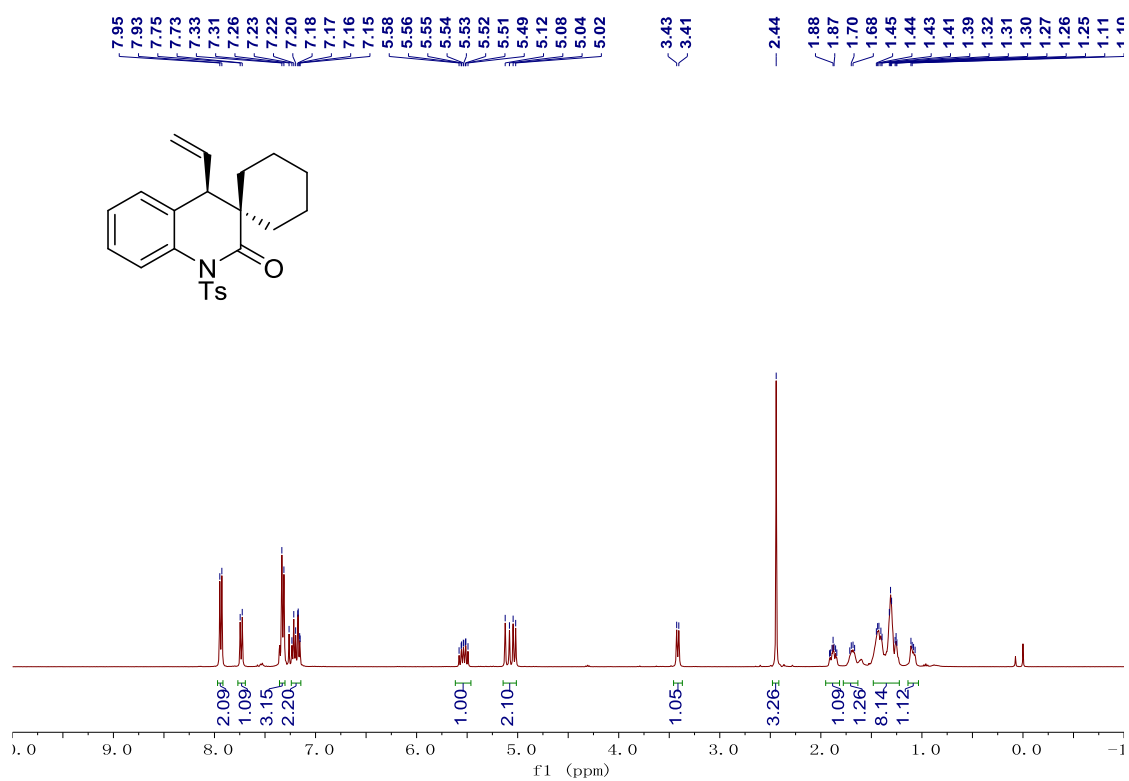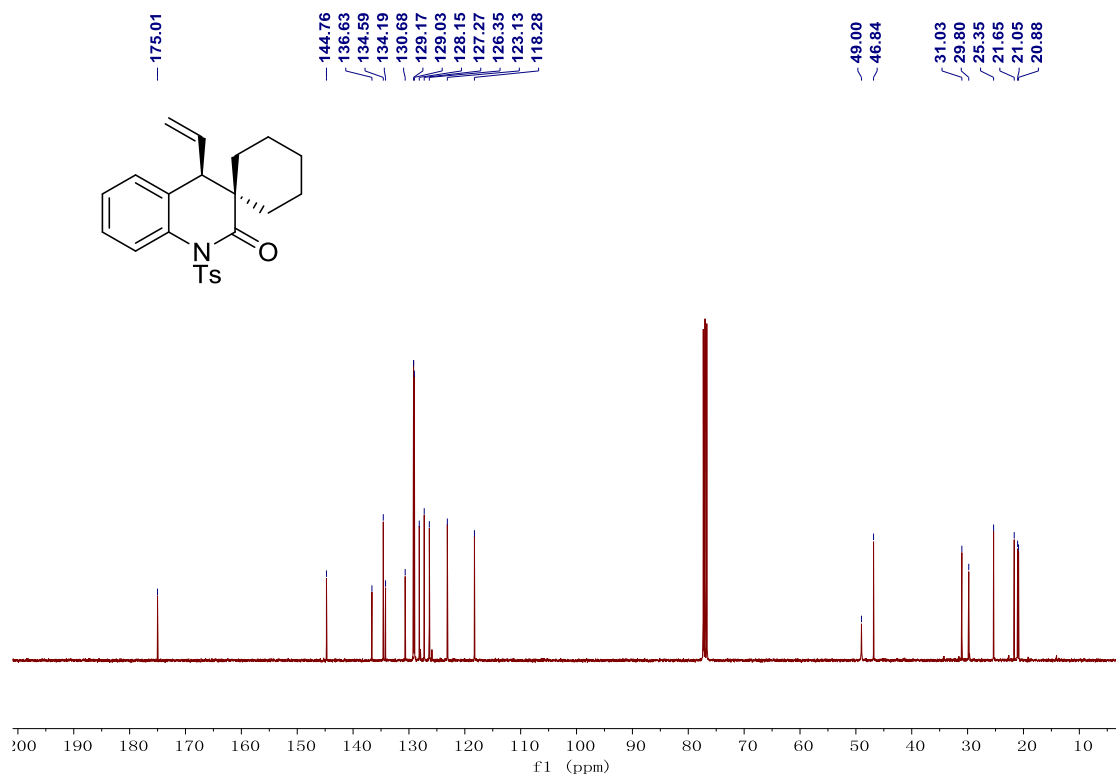

Supplementary Figure 31. <sup>1</sup>H and <sup>13</sup>C NMR of compound 3ao

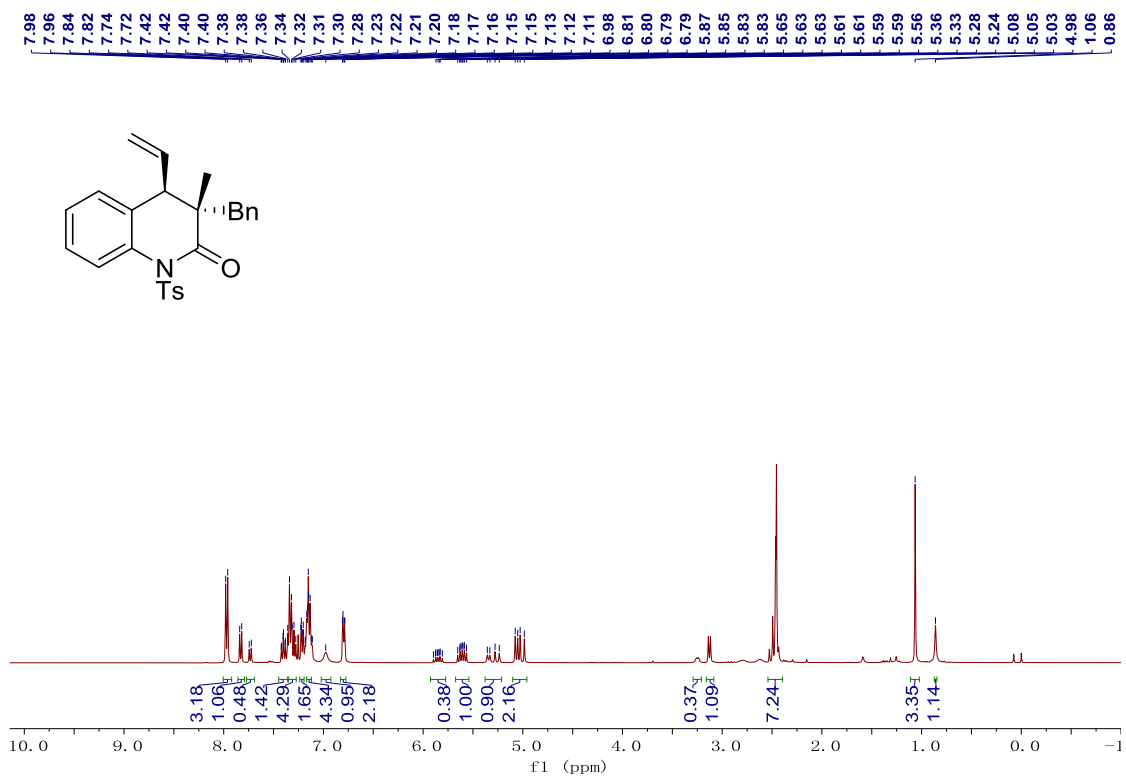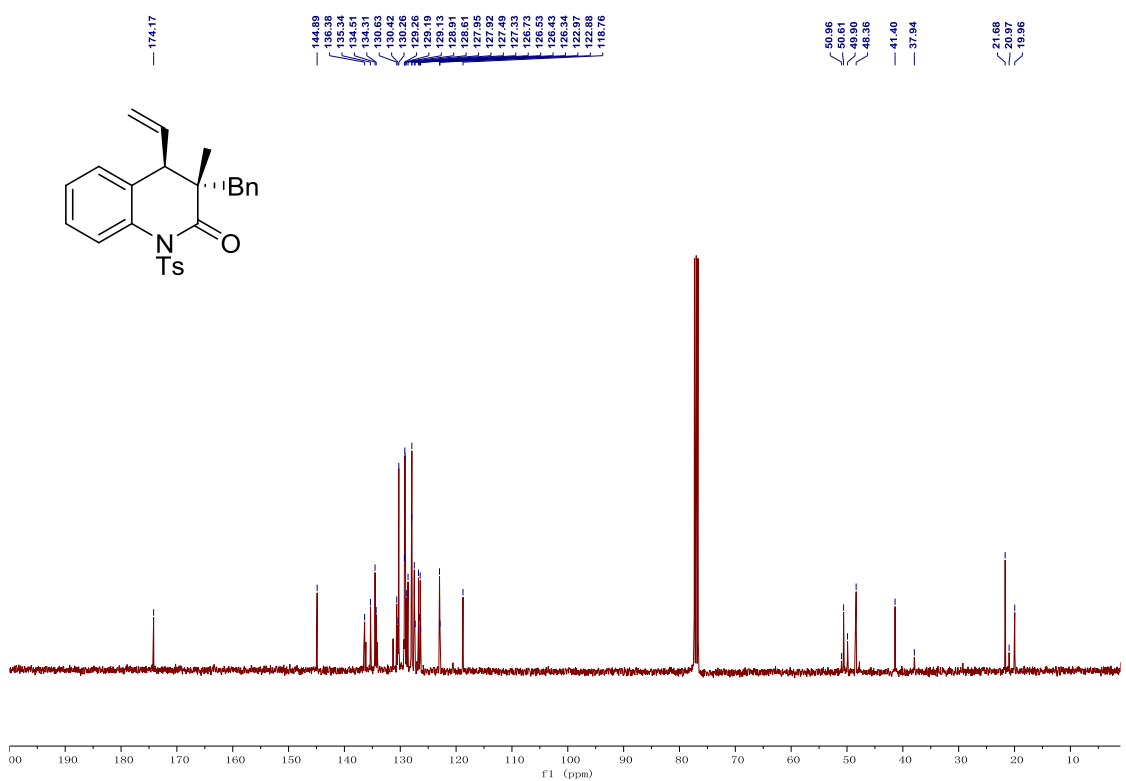

Supplementary Figure 32. <sup>1</sup>H and <sup>13</sup>C NMR of compound 3ap

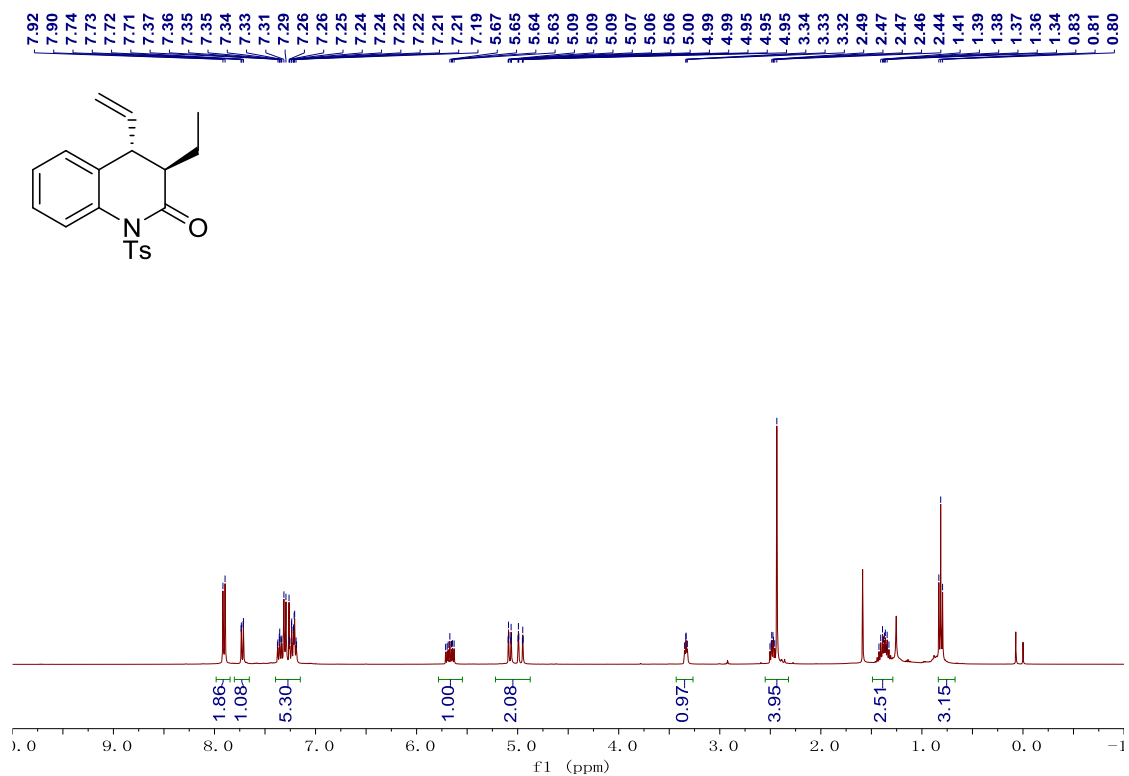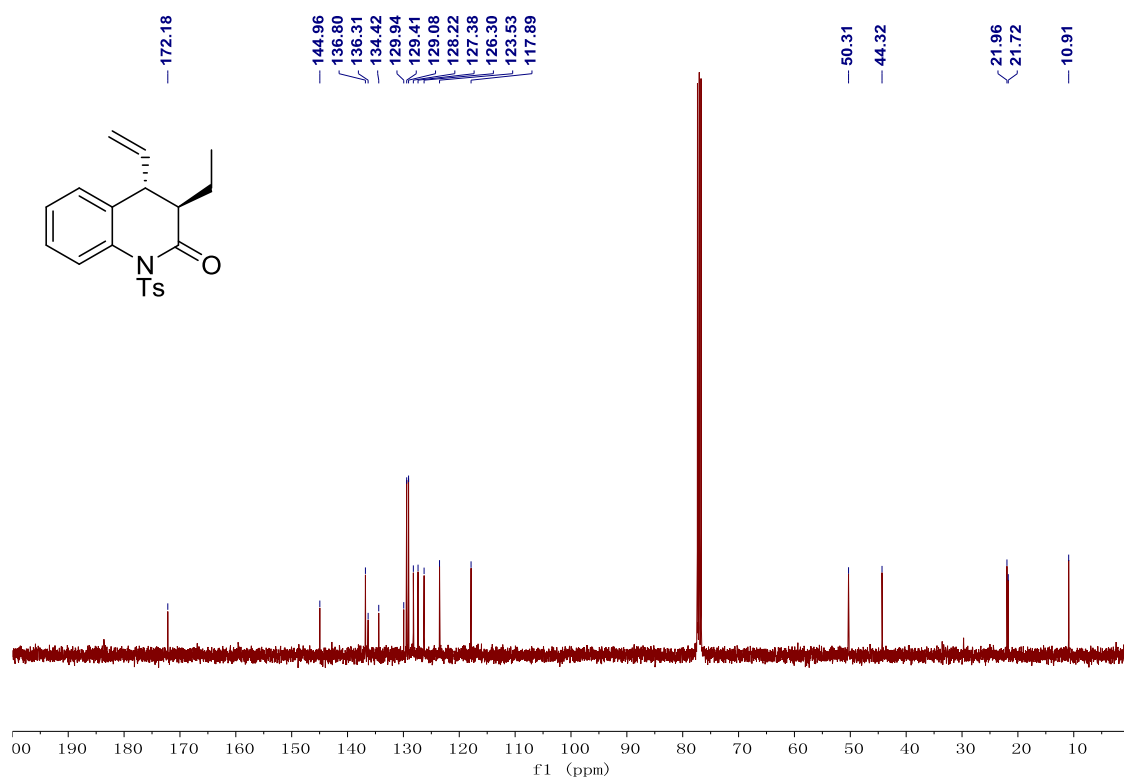

Supplementary Figure 33. <sup>1</sup>H and <sup>13</sup>C NMR of compound 3ar

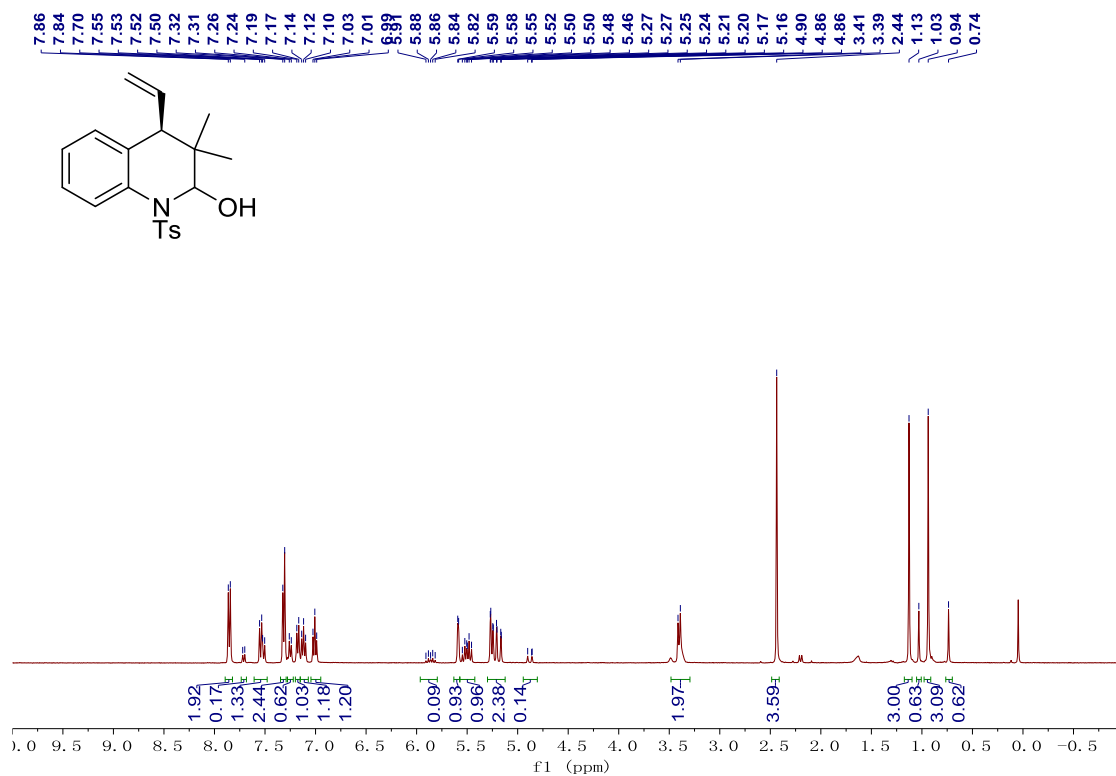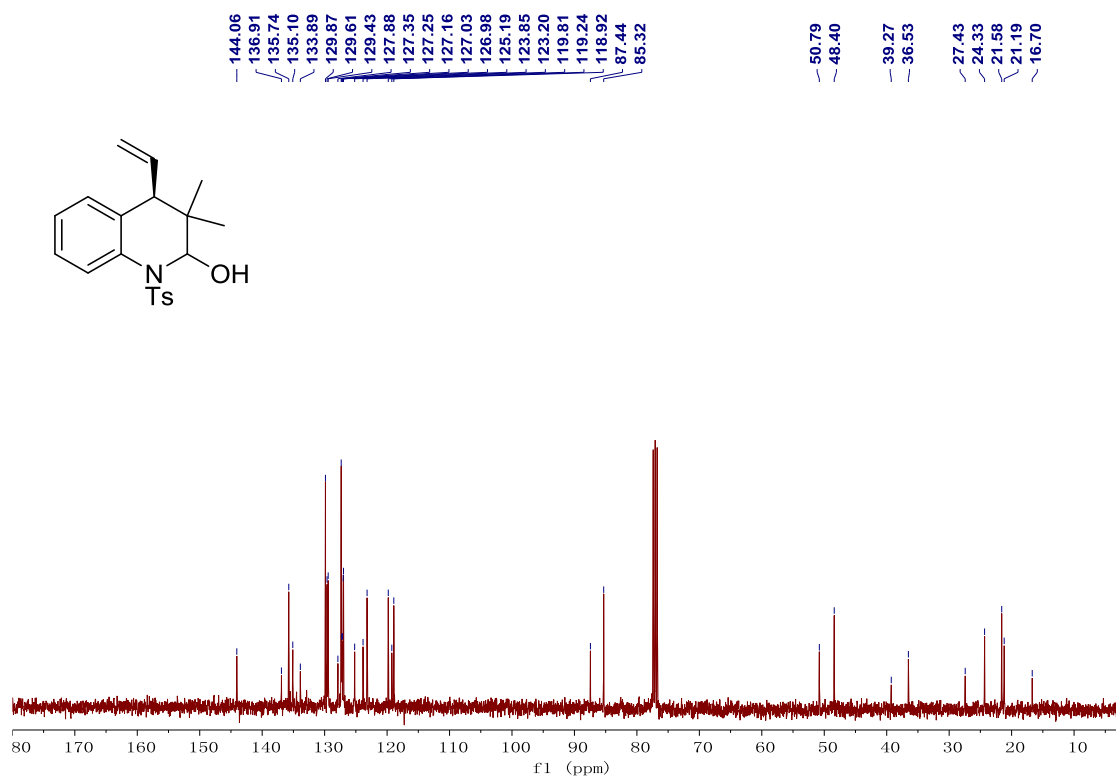

Supplementary Figure 34. <sup>1</sup>H and <sup>13</sup>C NMR of compound 4aq

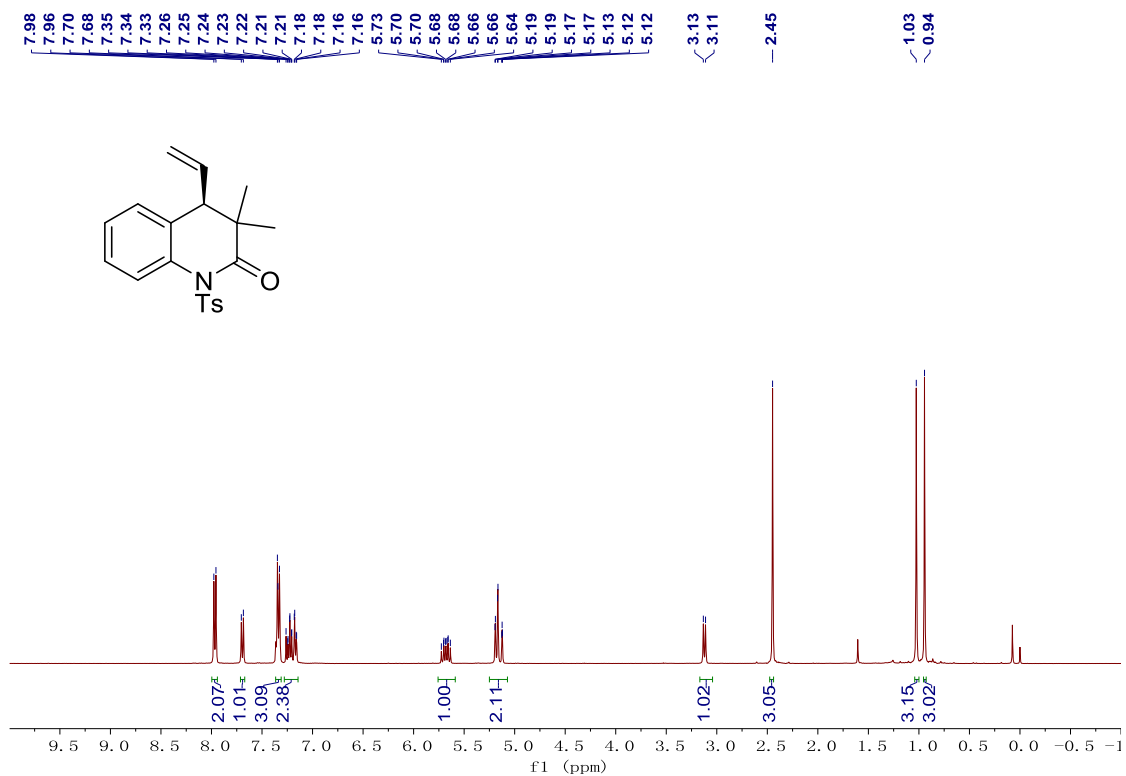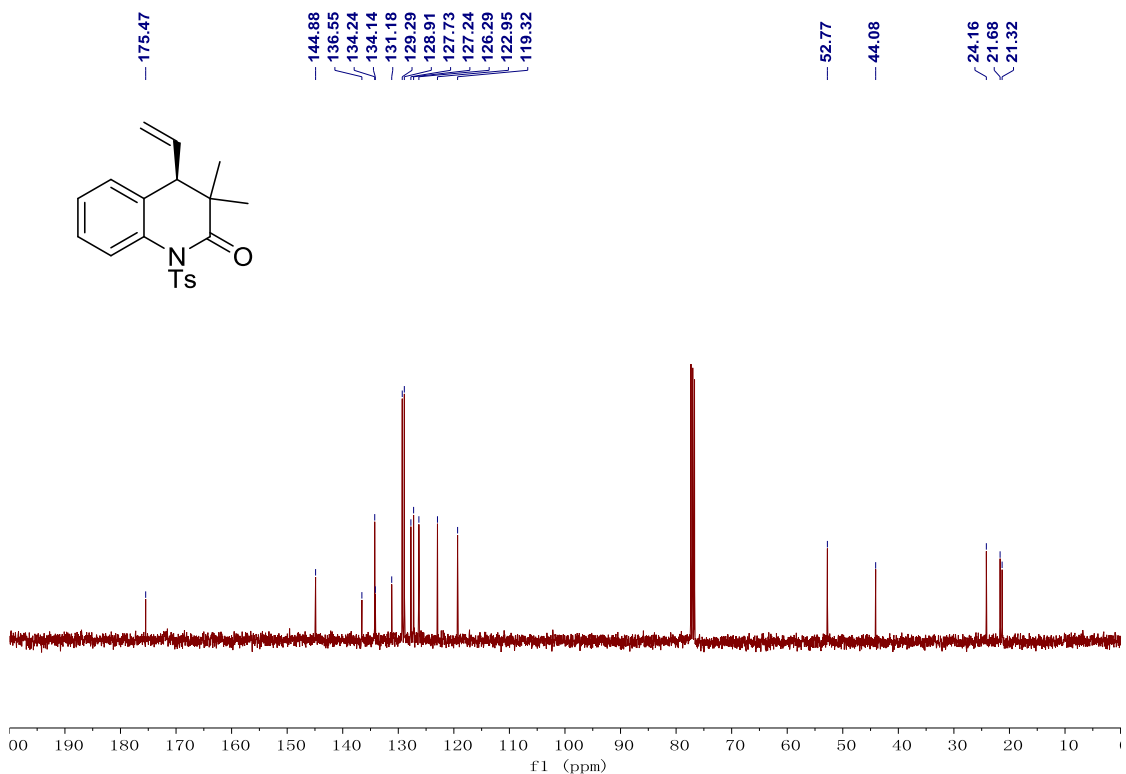

Supplementary Figure 35. <sup>1</sup>H and <sup>13</sup>C NMR of compound 5a



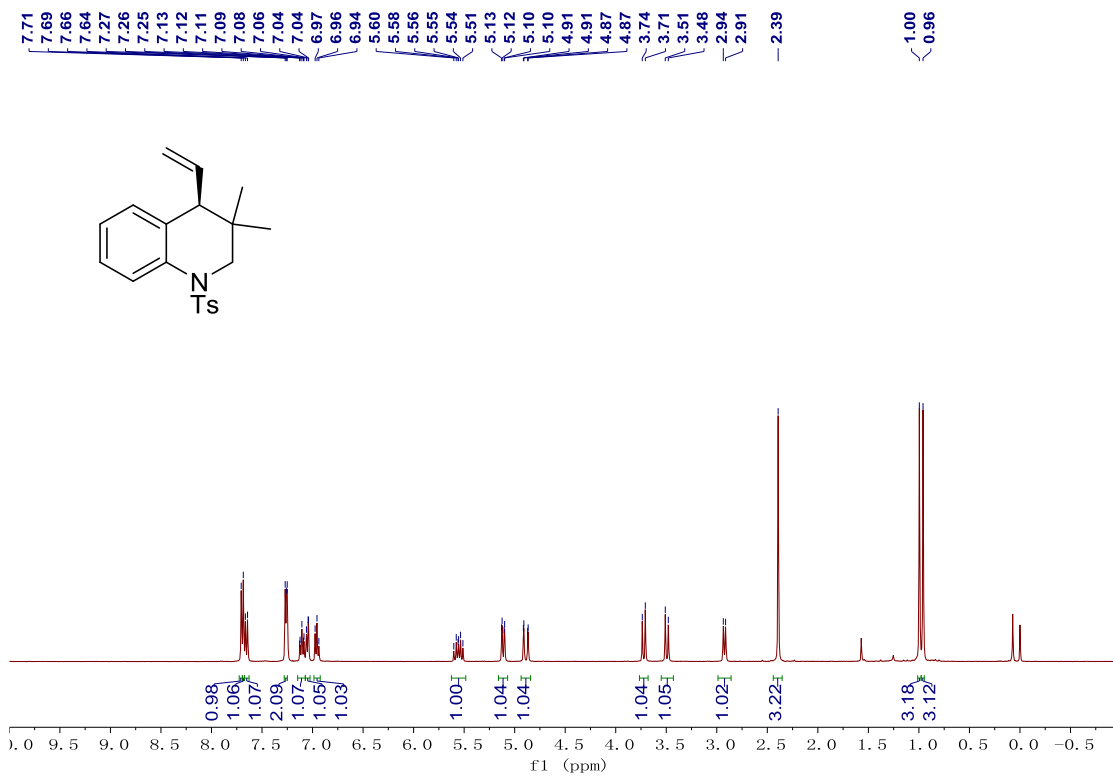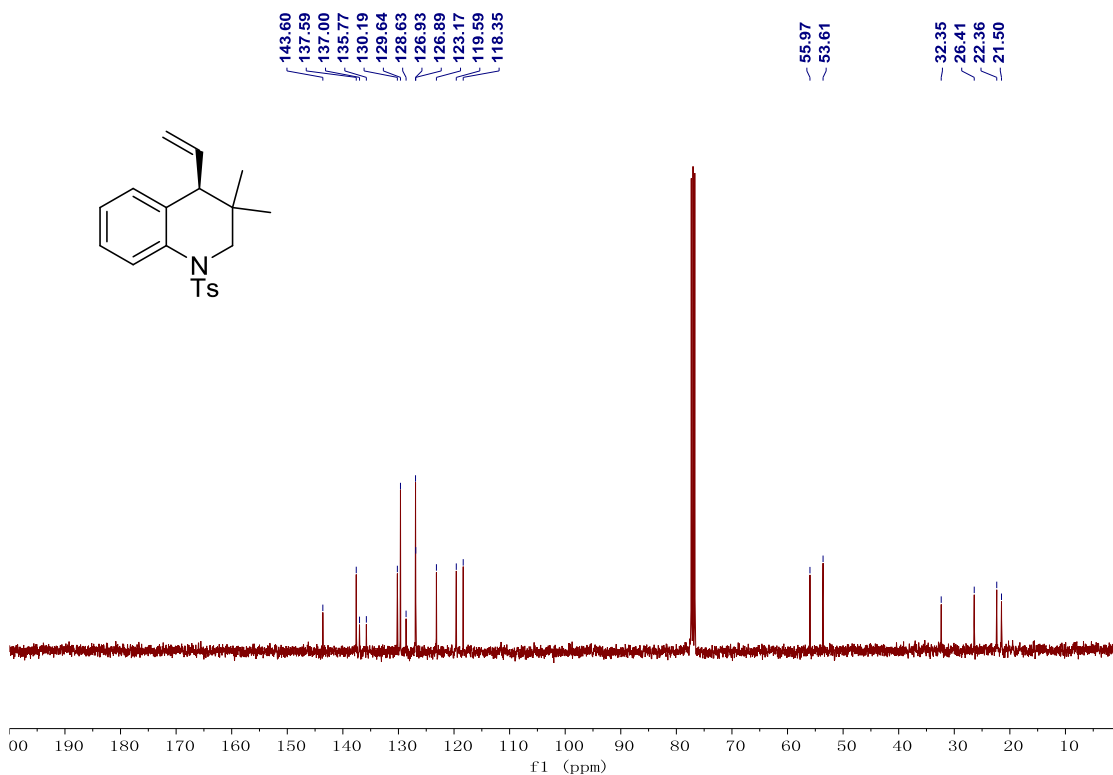

Supplementary Figure 36. <sup>1</sup>H and <sup>13</sup>C NMR of compound 5b

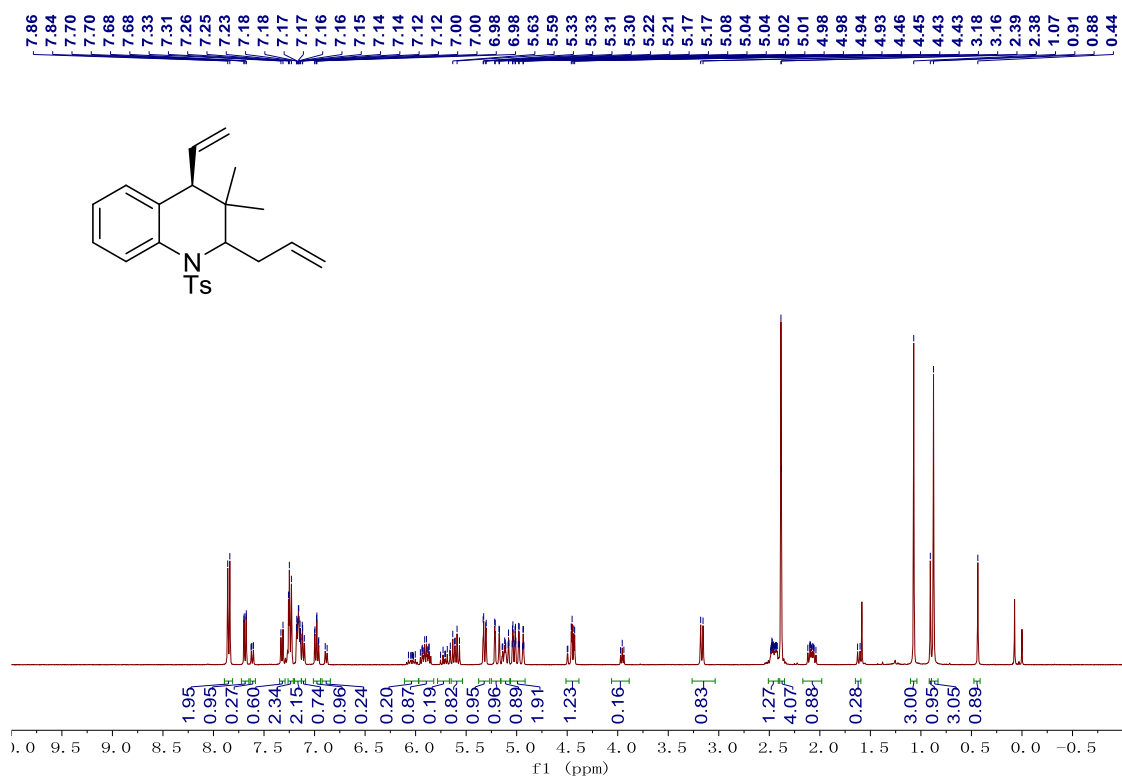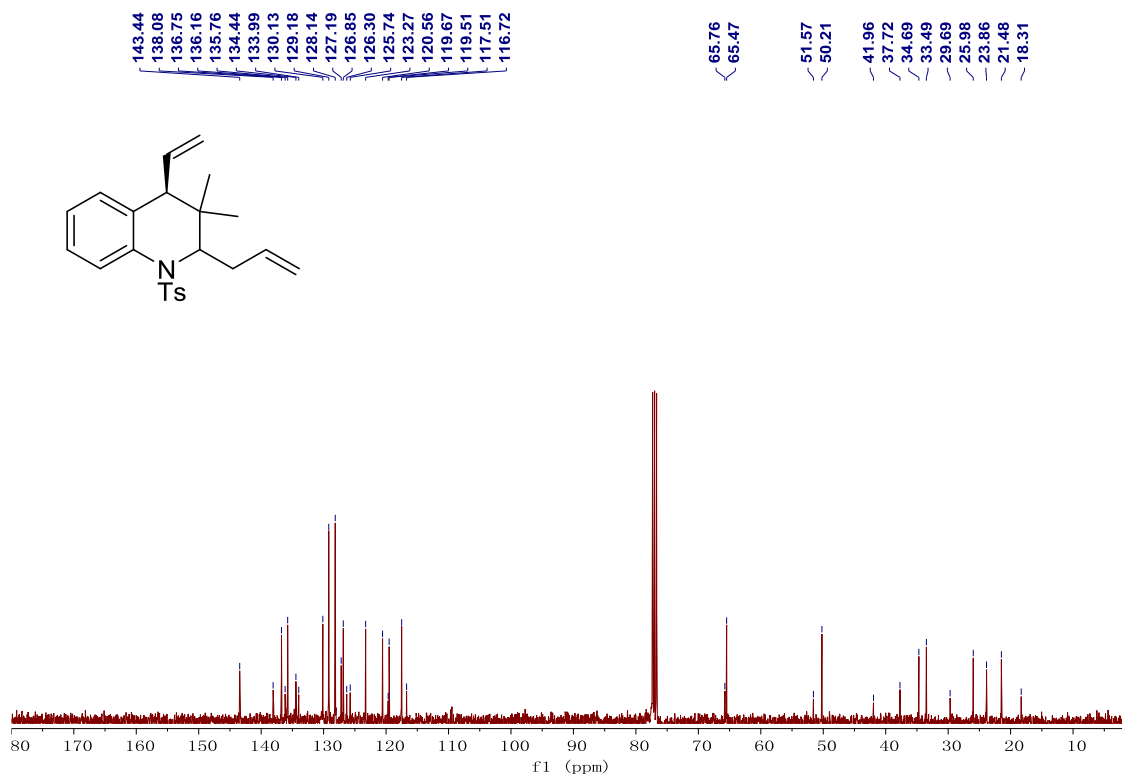

Supplementary Figure 37.  $^1\text{H}$  and  $^{13}\text{C}$  NMR of compound 5c

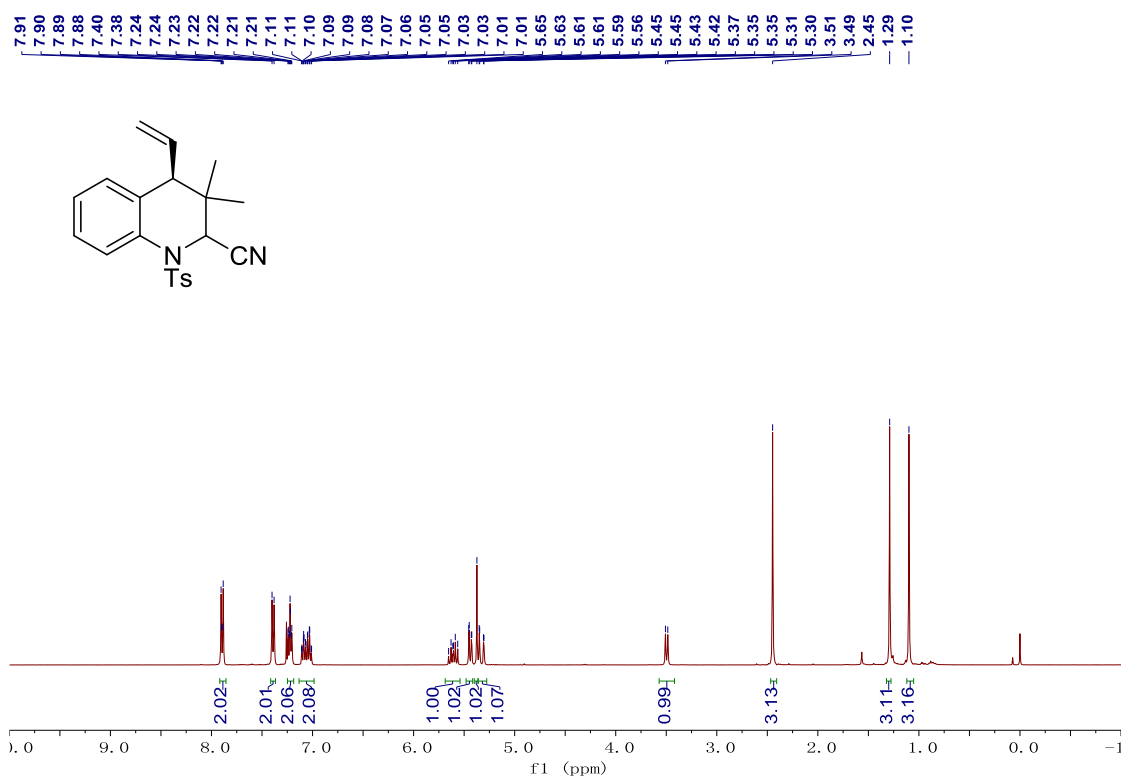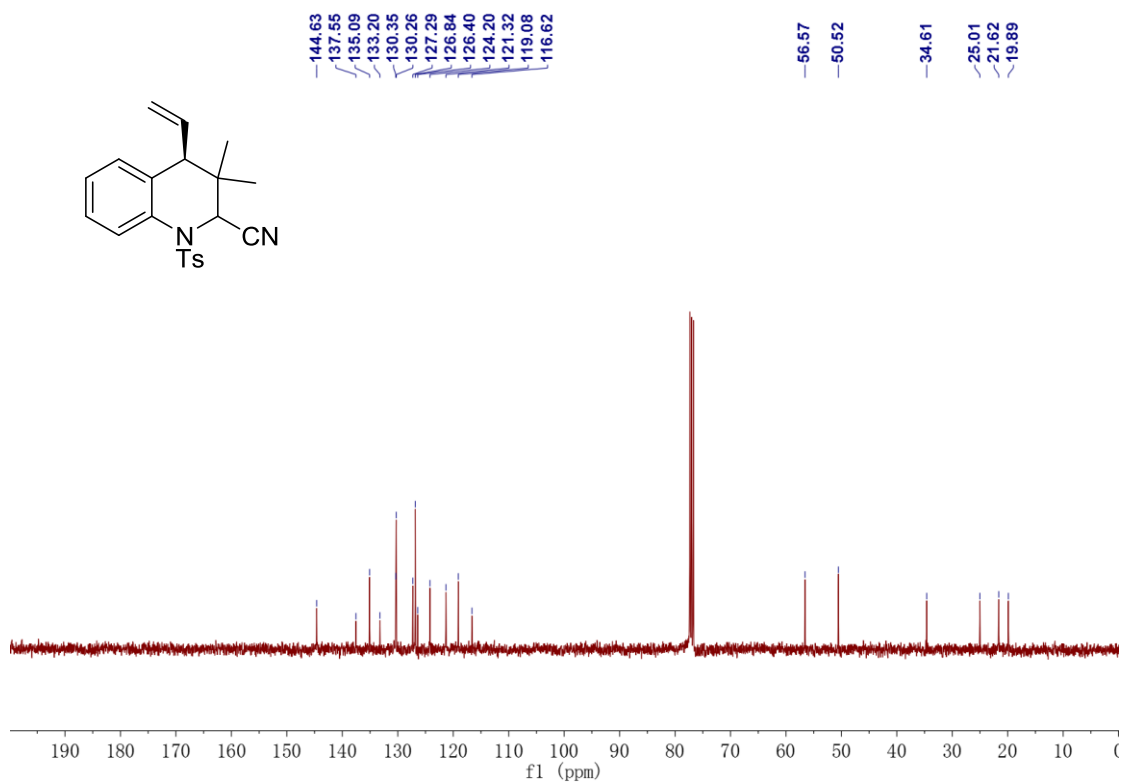

Supplementary Figure 38. <sup>1</sup>H and <sup>13</sup>C NMR of compound 5d

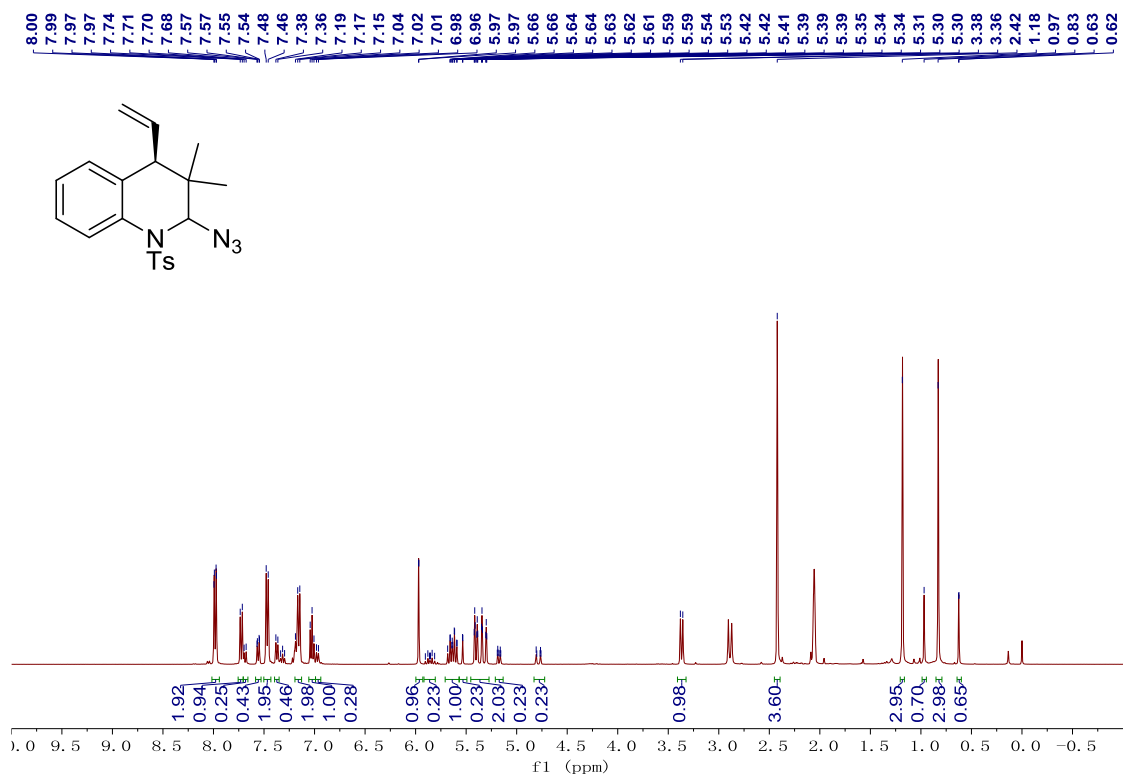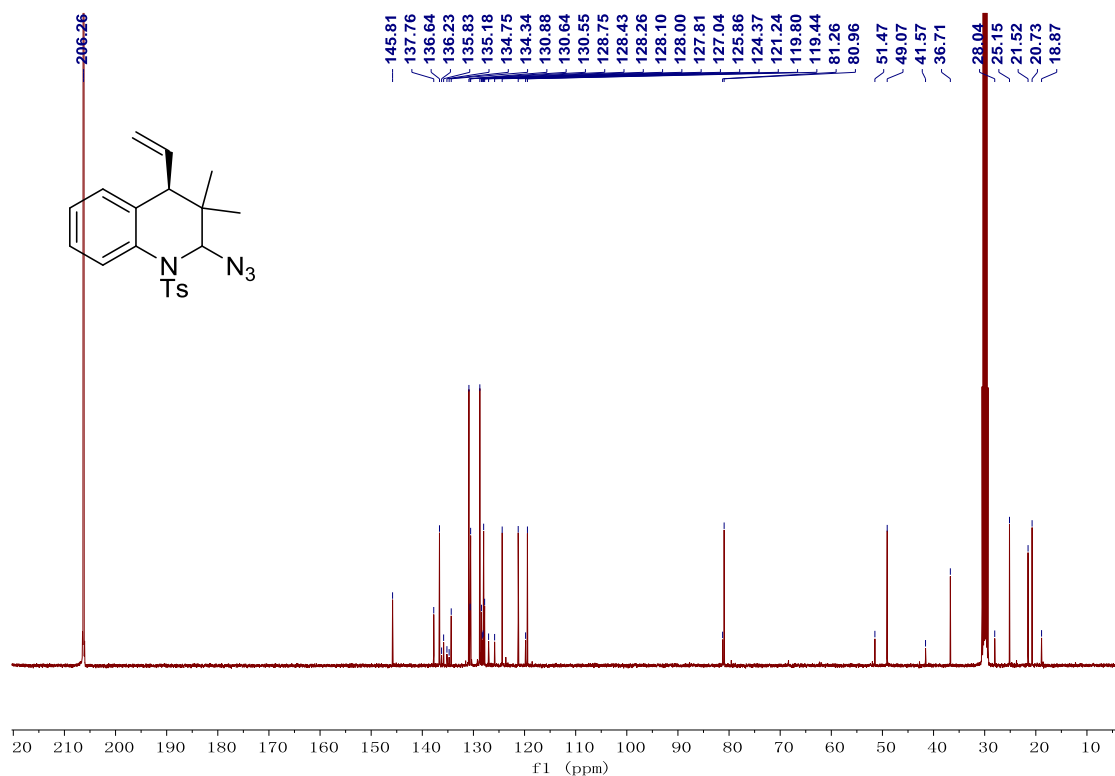

Supplementary Figure 39. <sup>1</sup>H and <sup>13</sup>C NMR of compound 5e (in Acetone-*d*<sub>6</sub>)

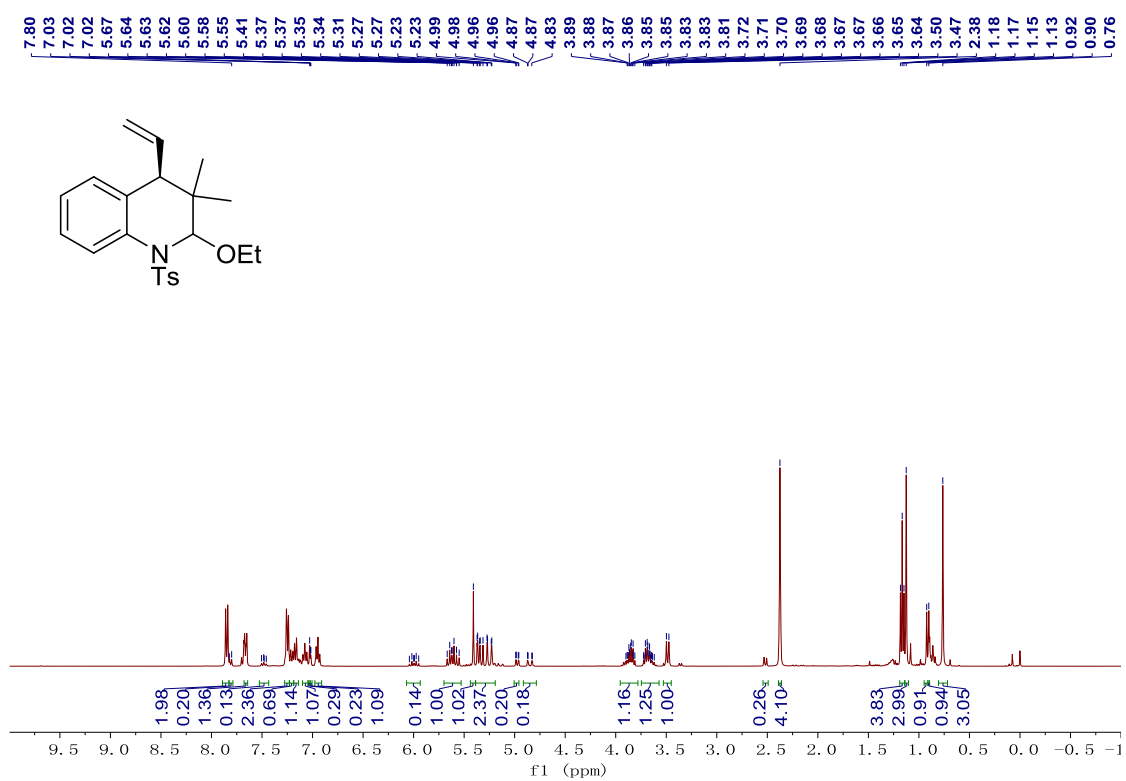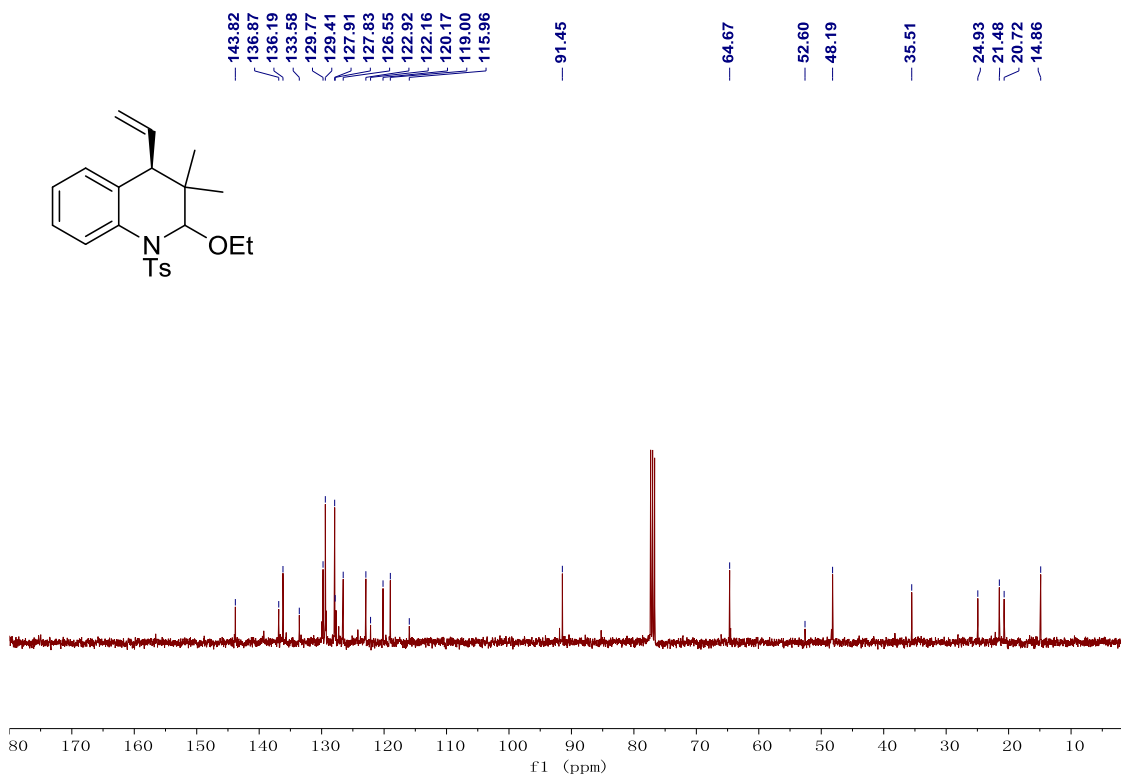

Supplementary Figure 40.  $^1\text{H}$  and  $^{13}\text{C}$  NMR of compound **5f**

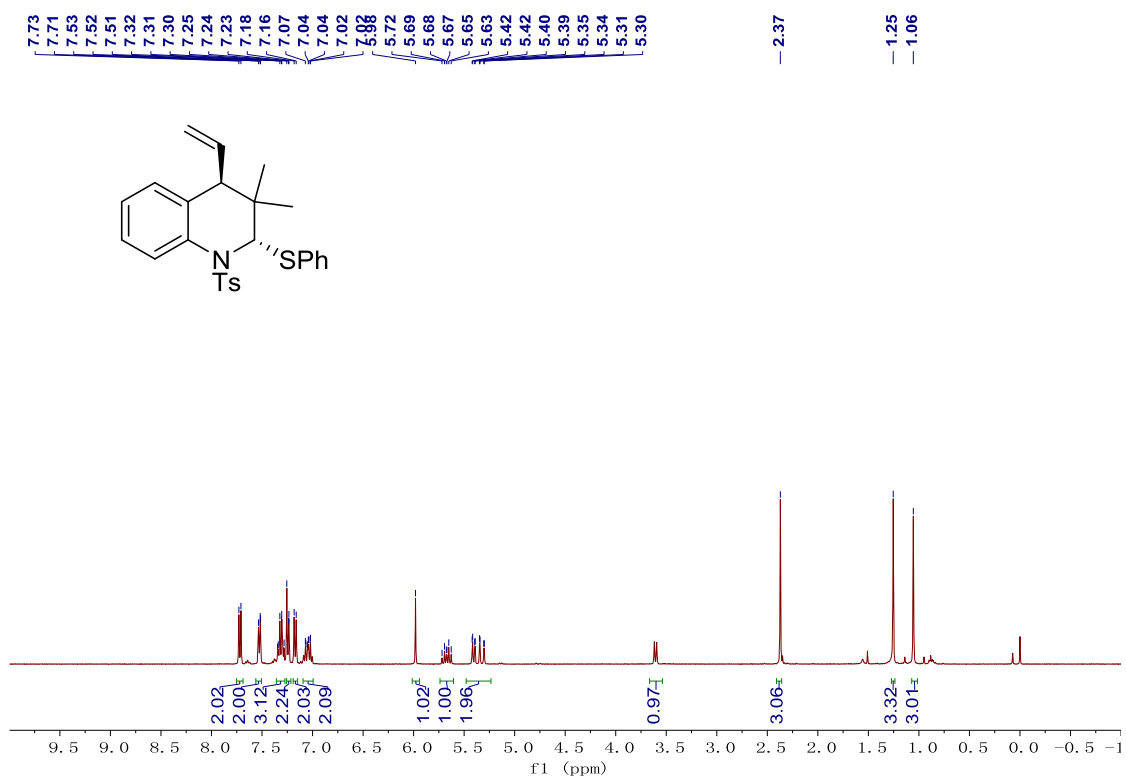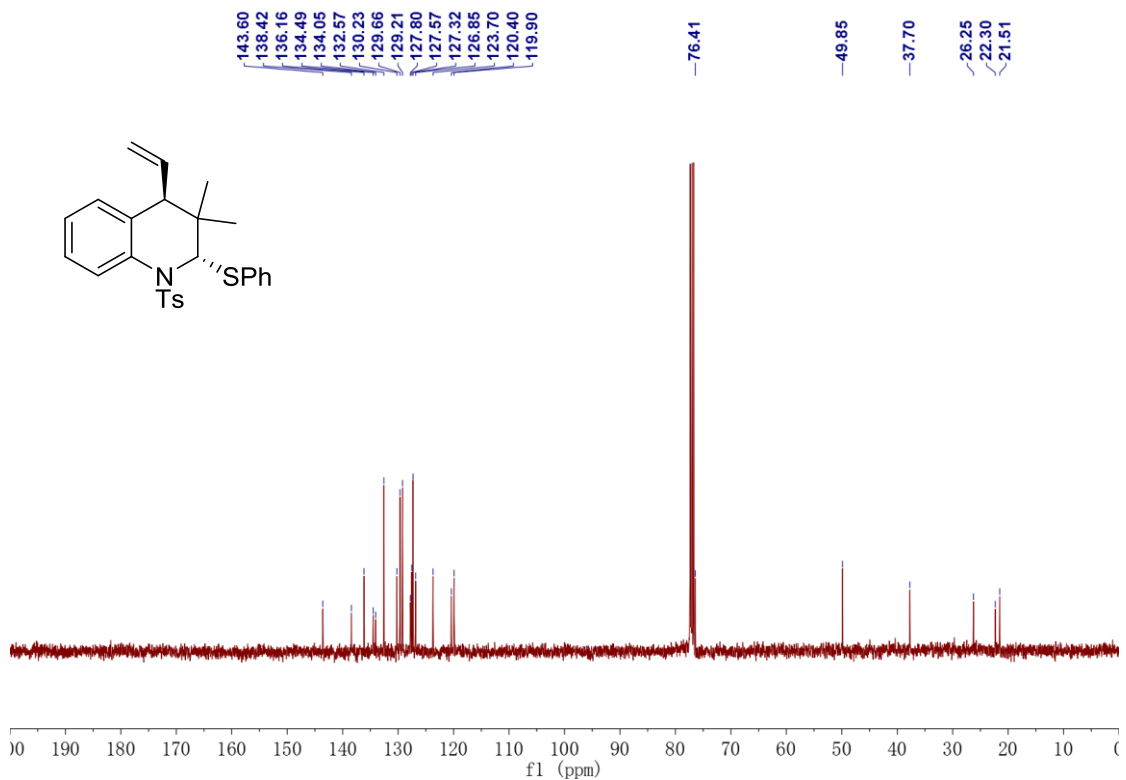

Supplementary Figure 41. <sup>1</sup>H and <sup>13</sup>C NMR of compound 5g

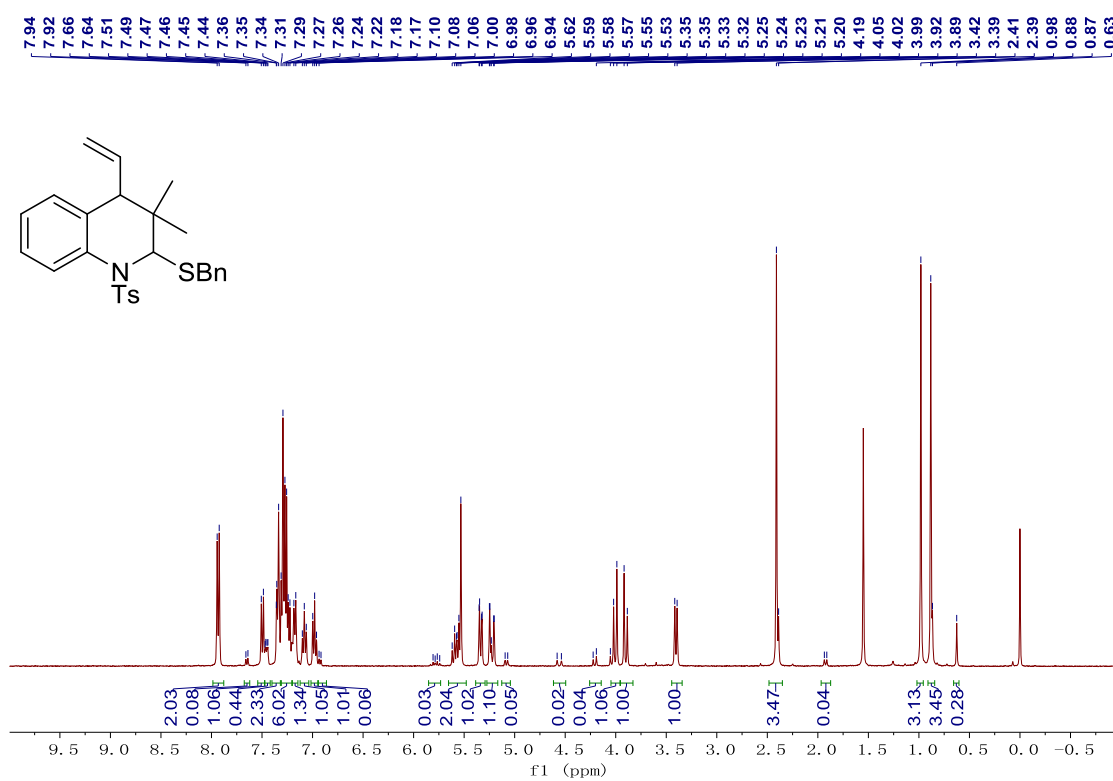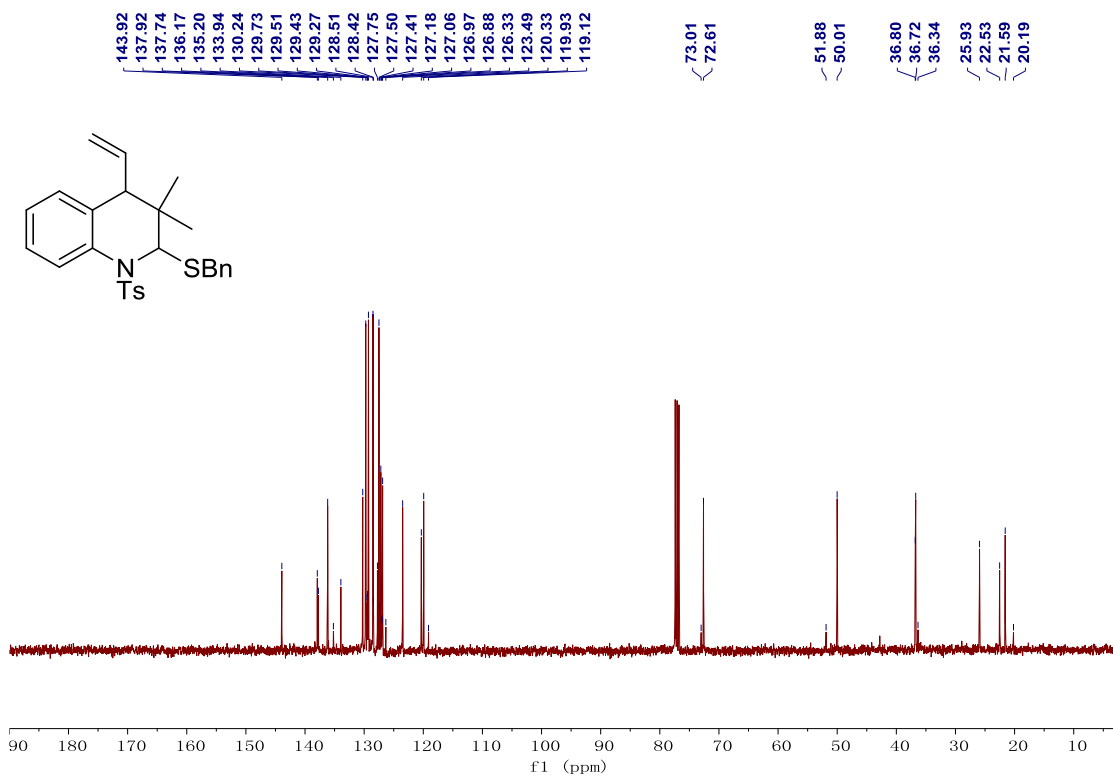

Supplementary Figure 42. <sup>1</sup>H and <sup>13</sup>C NMR of compound 5h

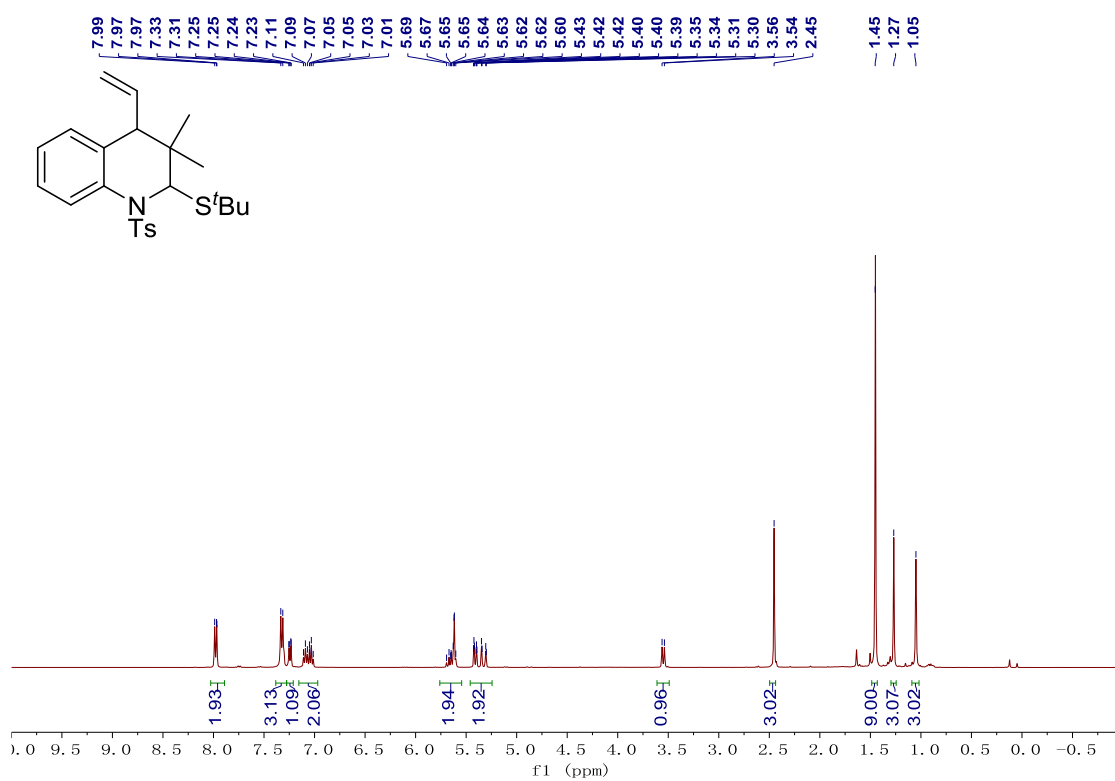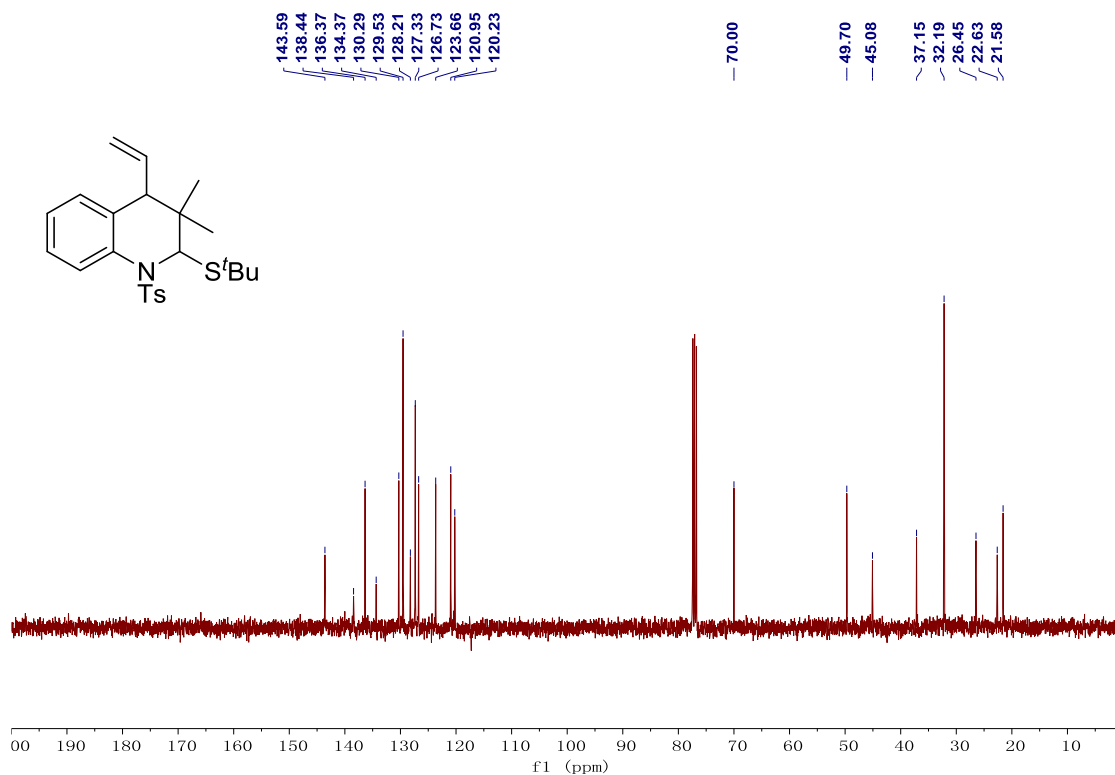

Supplementary Figure 43. <sup>1</sup>H and <sup>13</sup>C NMR of compound **5i**



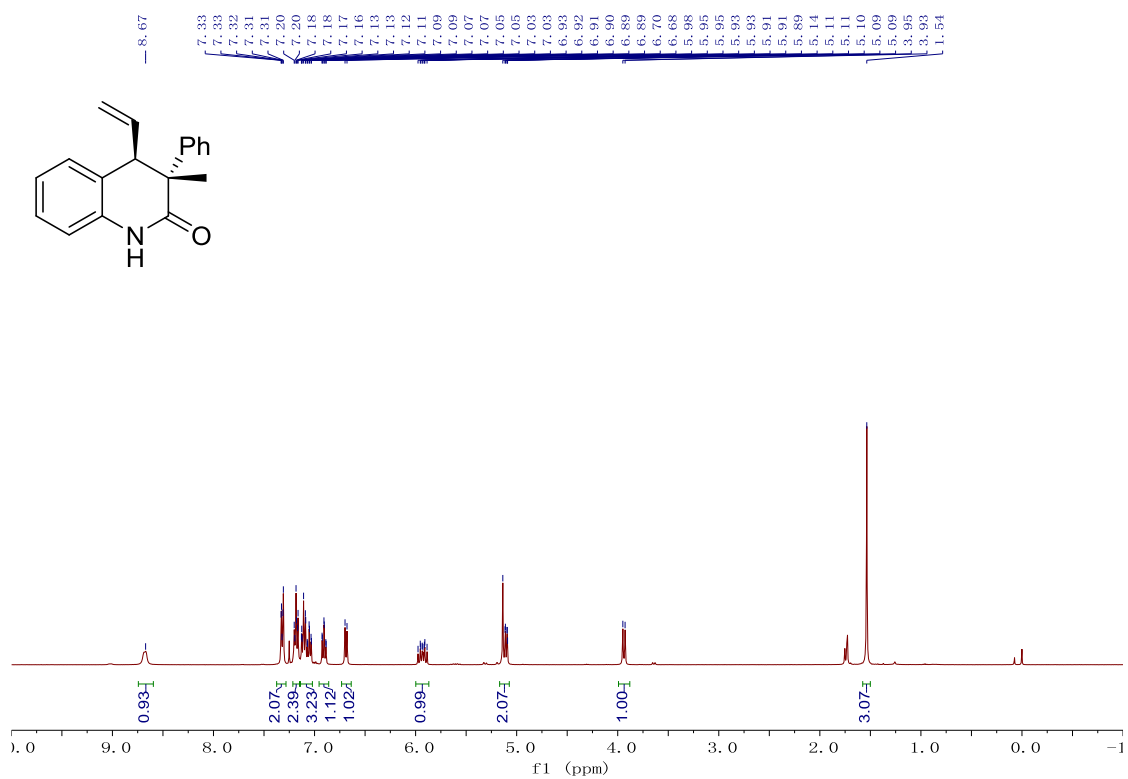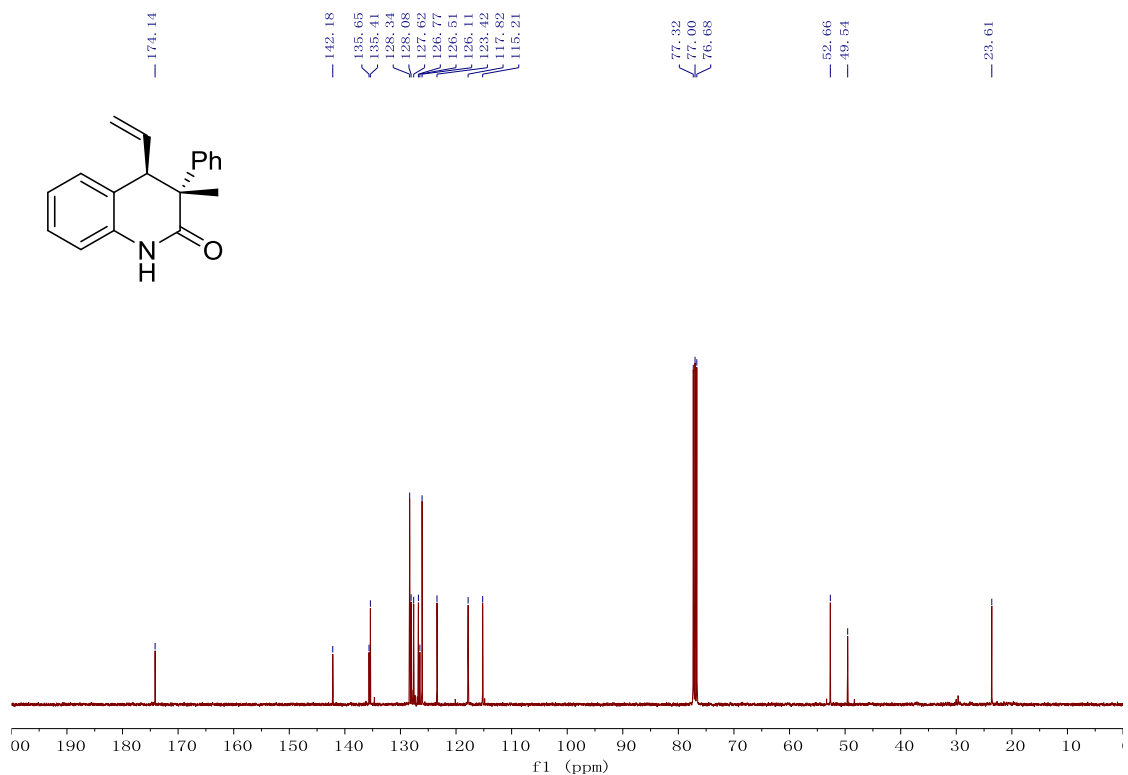

Supplementary Figure 43.  $^1\text{H}$  and  $^{13}\text{C}$  NMR of compound **8aa**

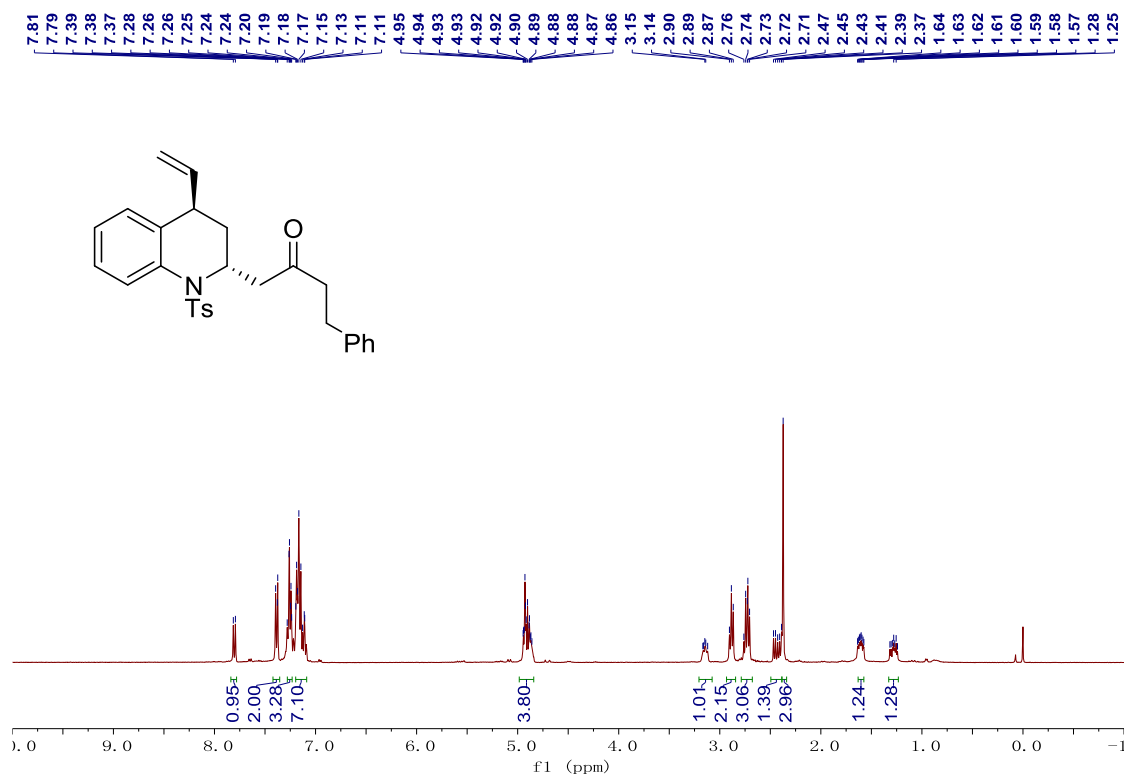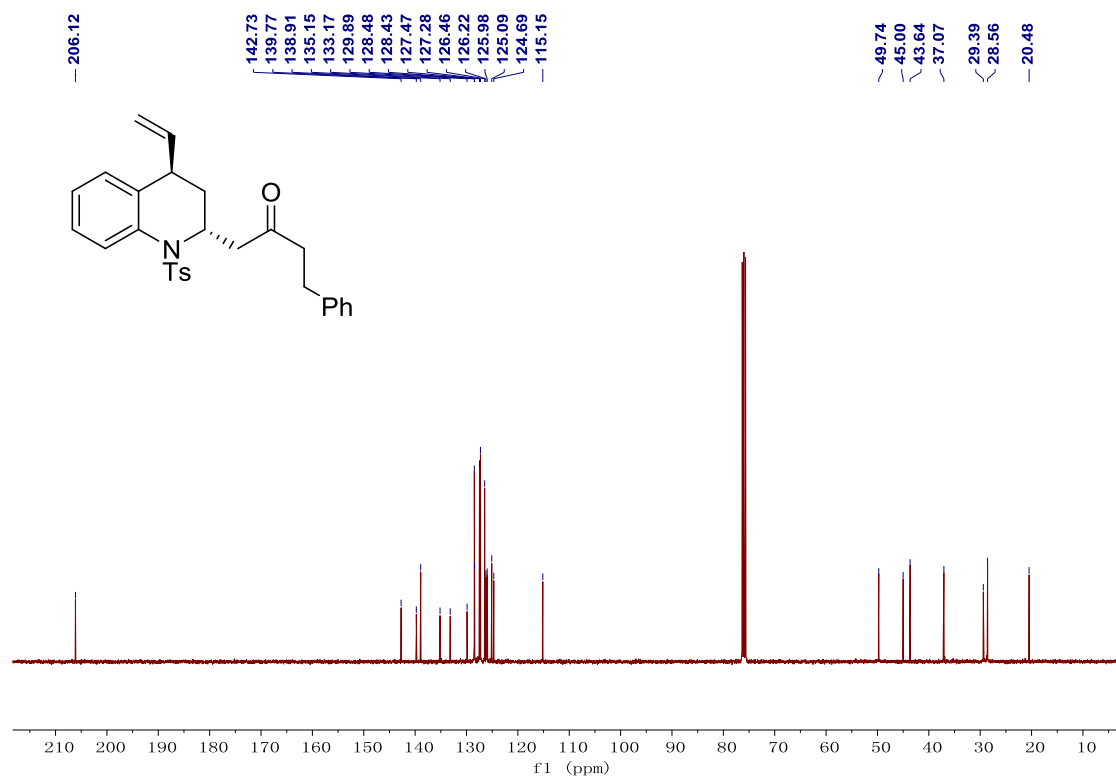

Supplementary Figure 44. <sup>1</sup>H and <sup>13</sup>C NMR of compound (*R,R*)-7a

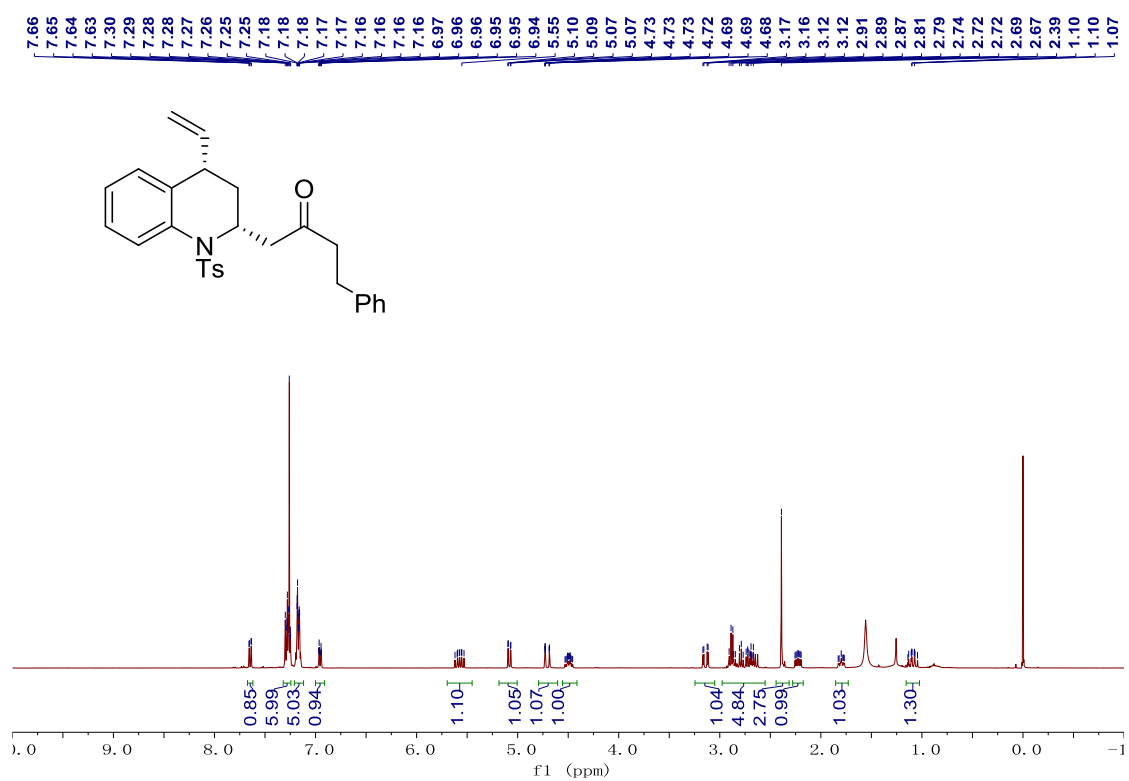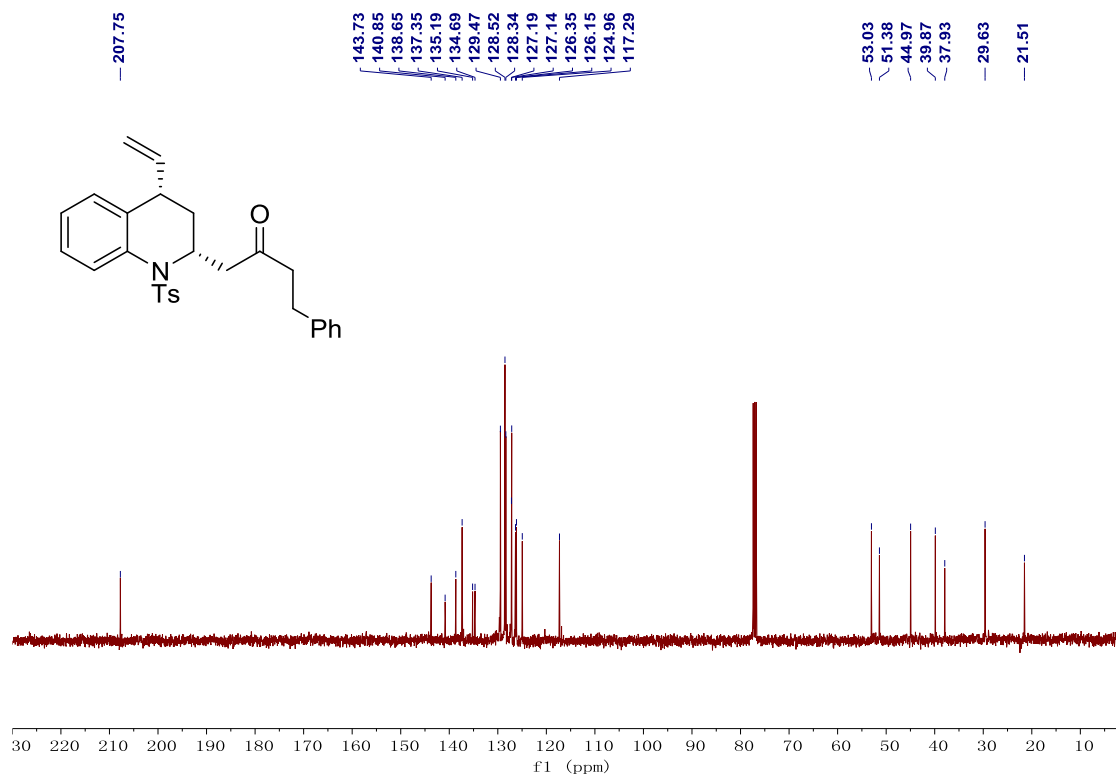

Supplementary Figure 45. <sup>1</sup>H and <sup>13</sup>C NMR of compound (R,S)-7a

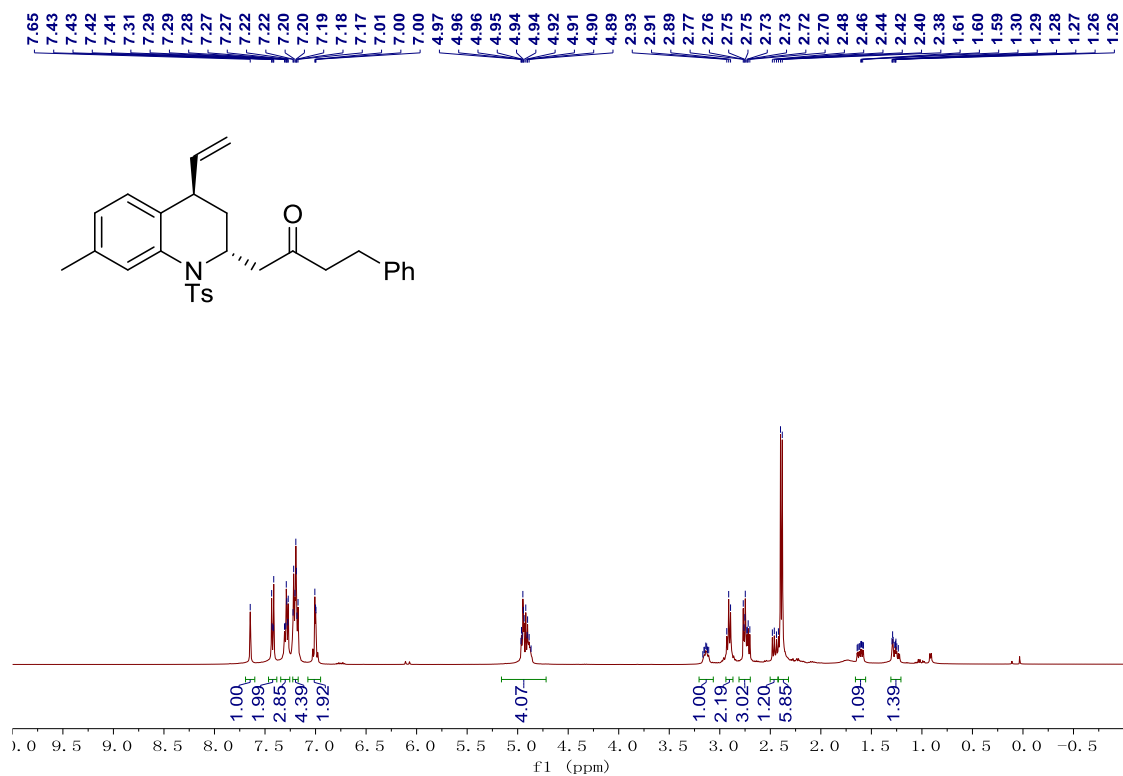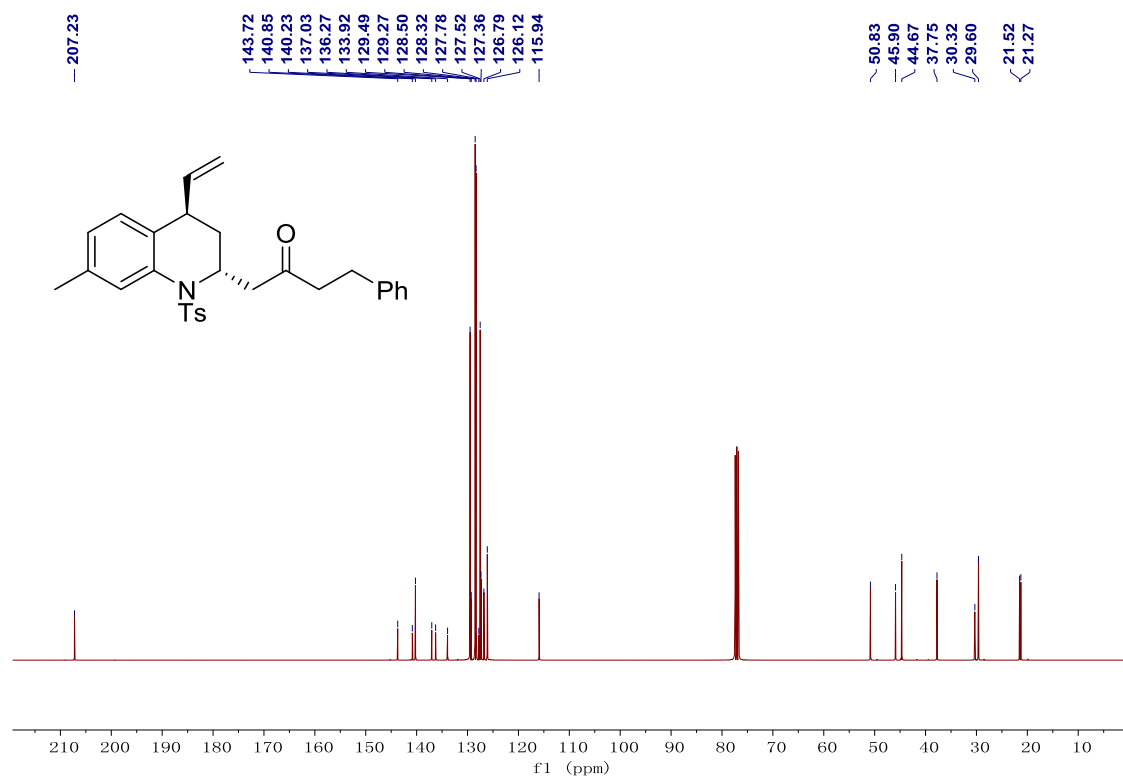

Supplementary Figure 46. <sup>1</sup>H and <sup>13</sup>C NMR of compound (*R,R*)-7b

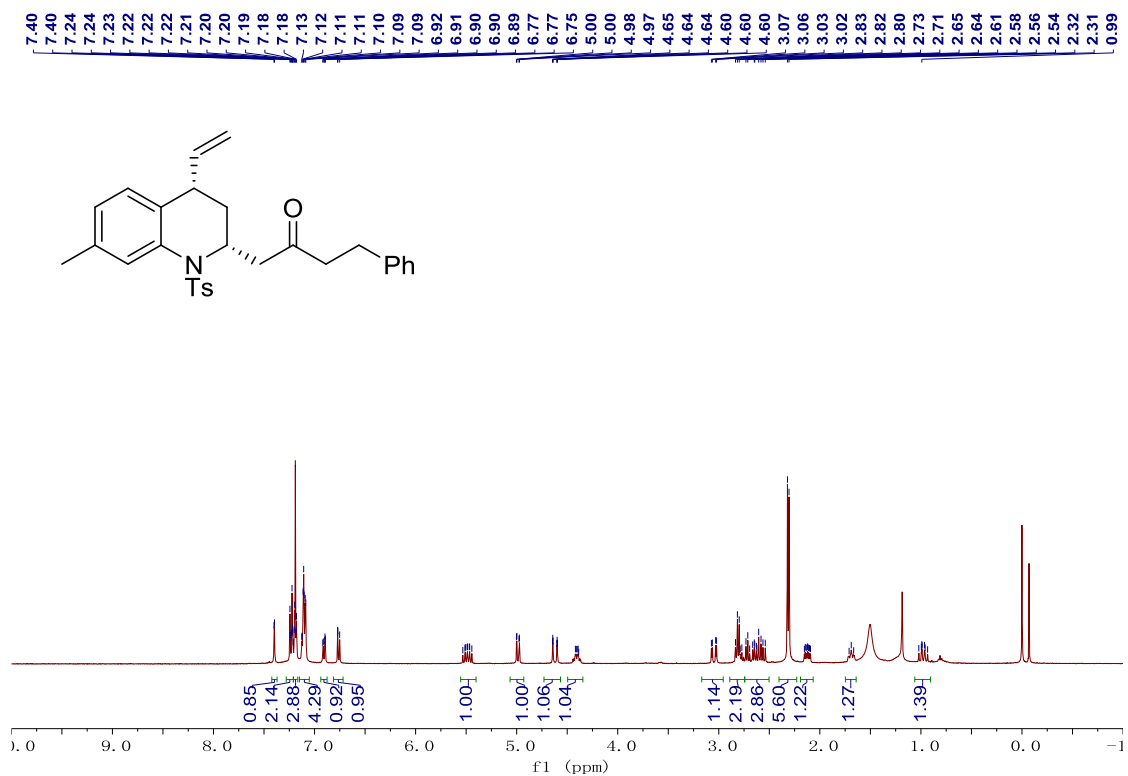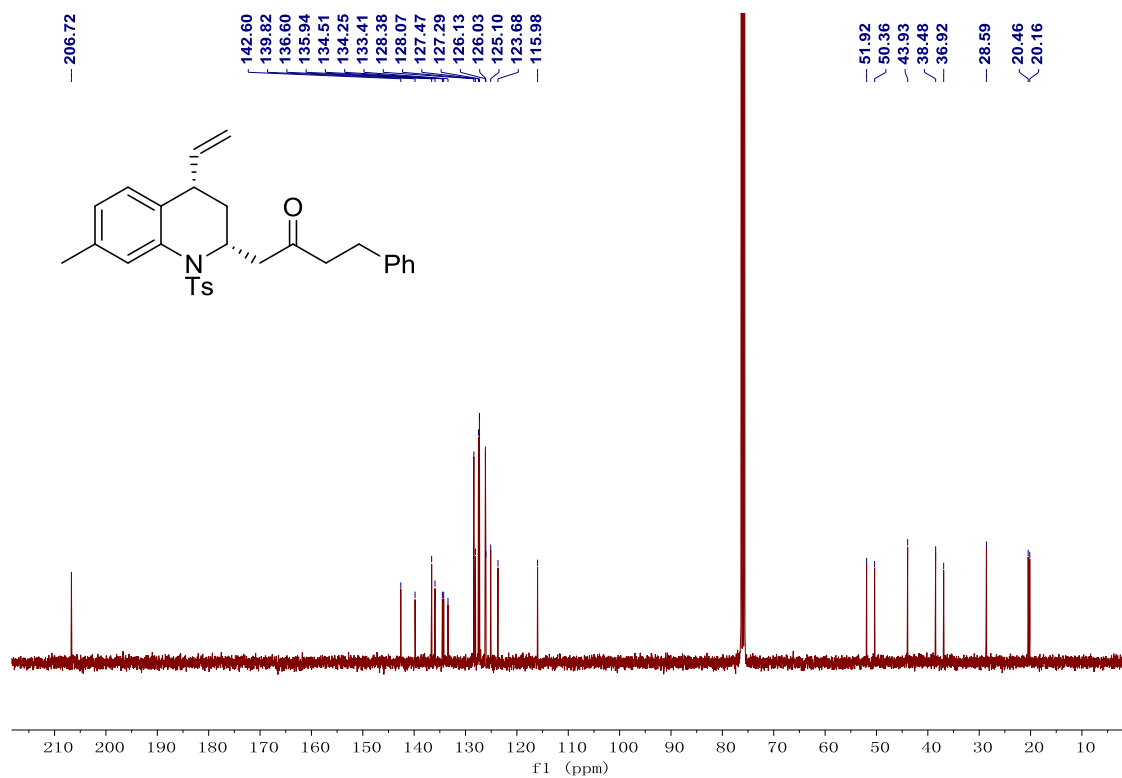

Supplementary Figure 47. <sup>1</sup>H and <sup>13</sup>C NMR of compound (*R,S*)-7b

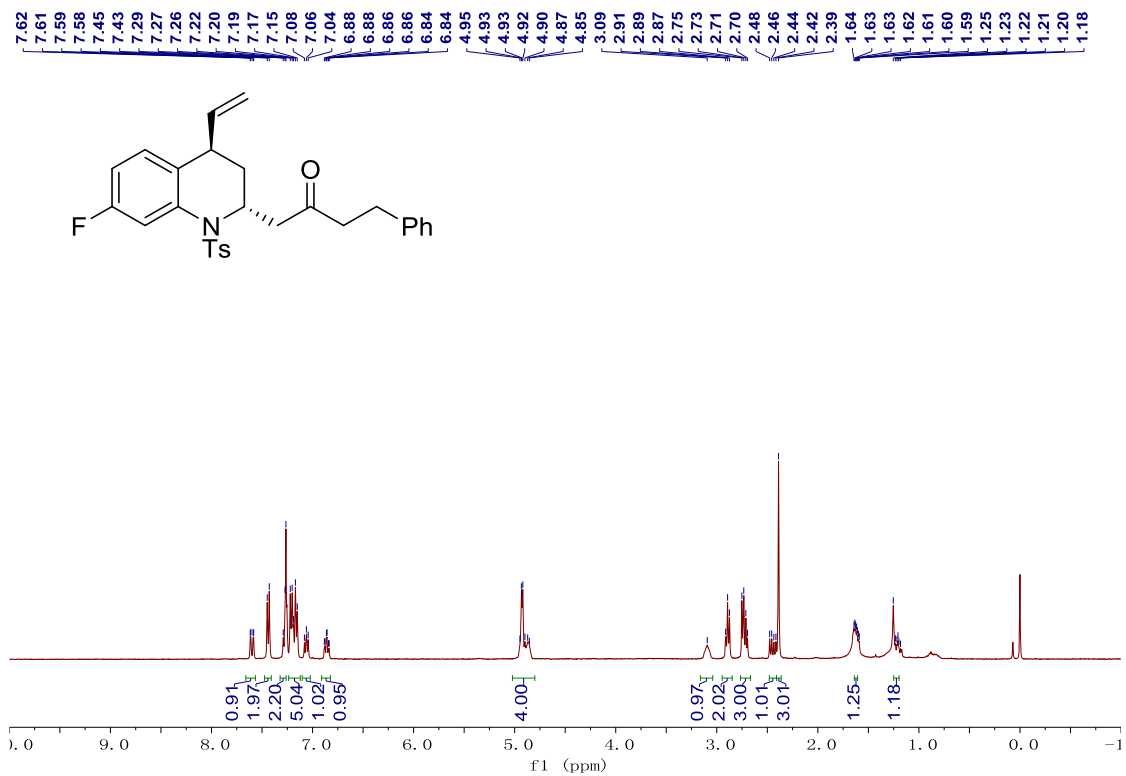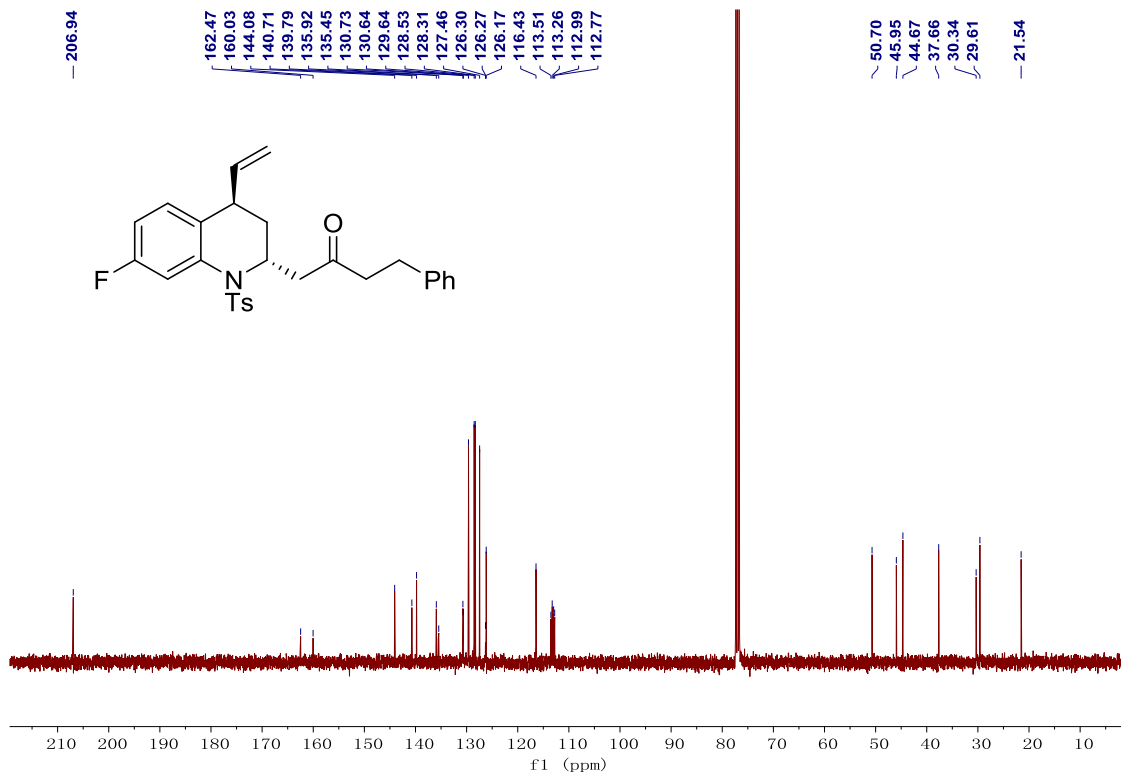

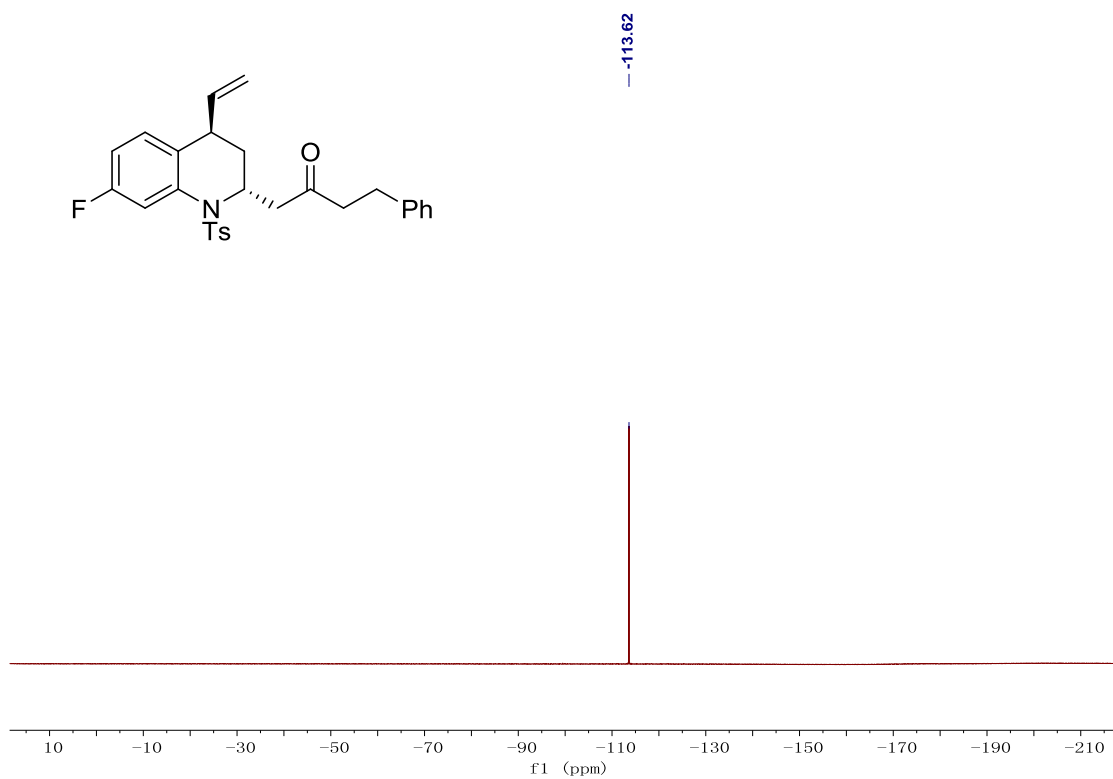

Supplementary Figure 48.  $^1\text{H}$  and  $^{13}\text{C}$  NMR  $^{19}\text{F}$  NMR of compound (R,R)-7c

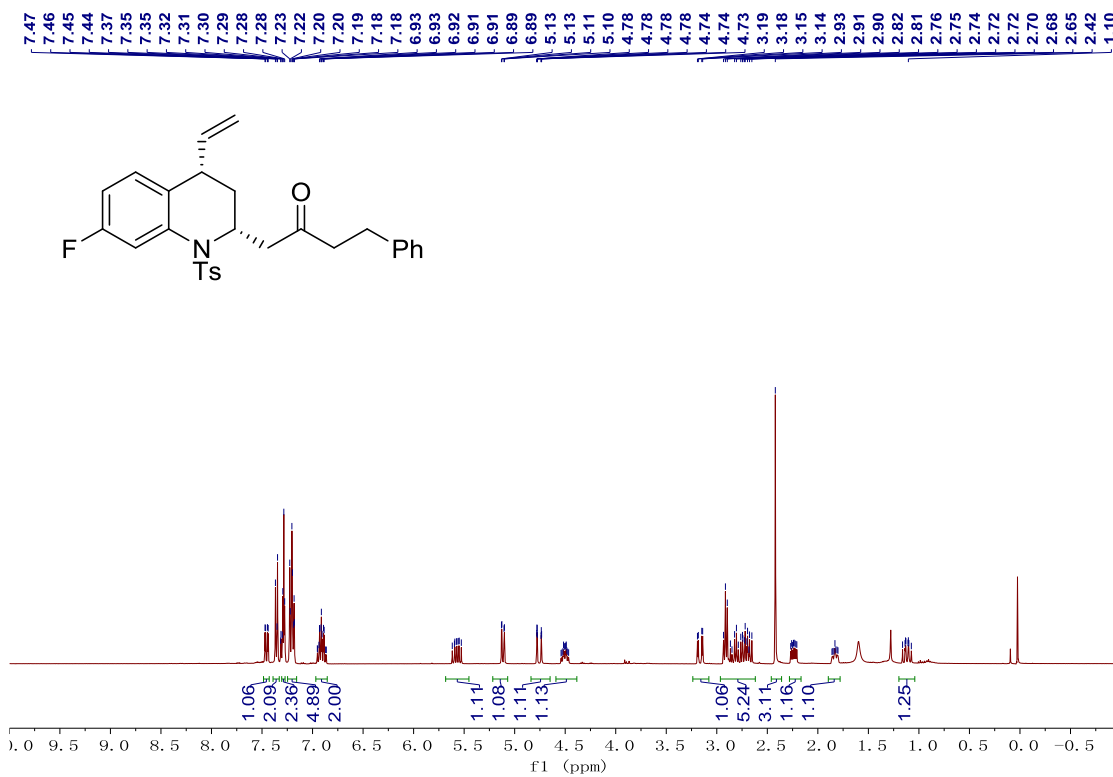

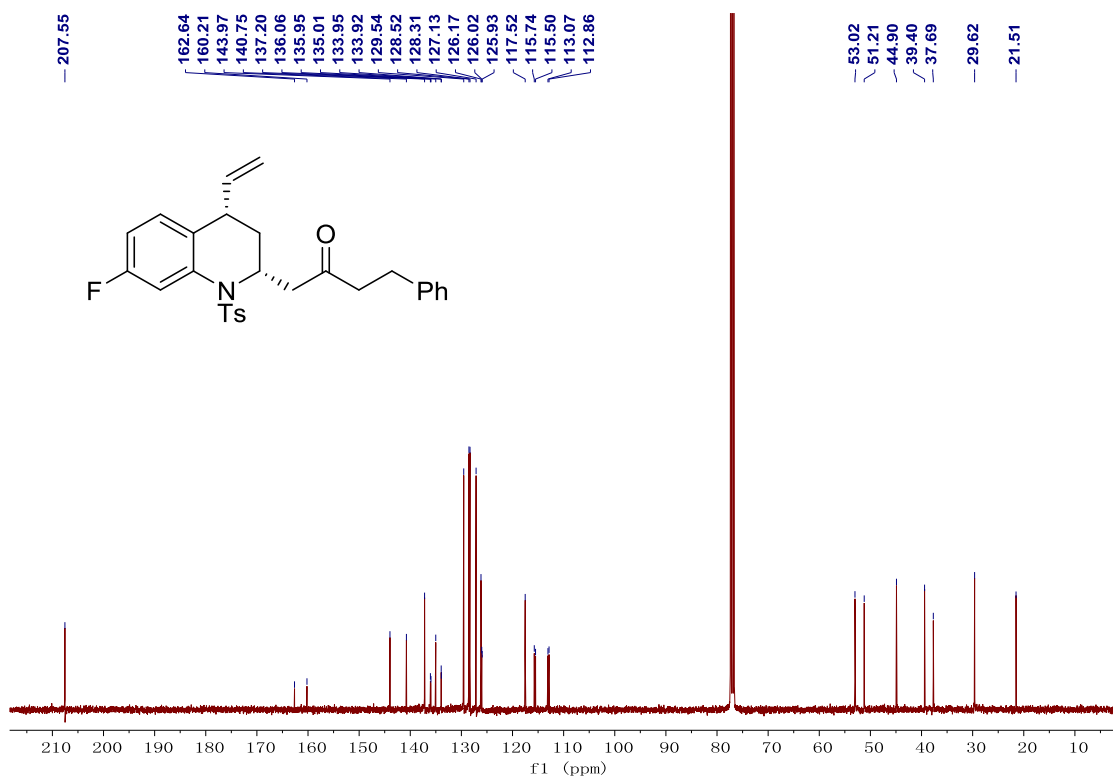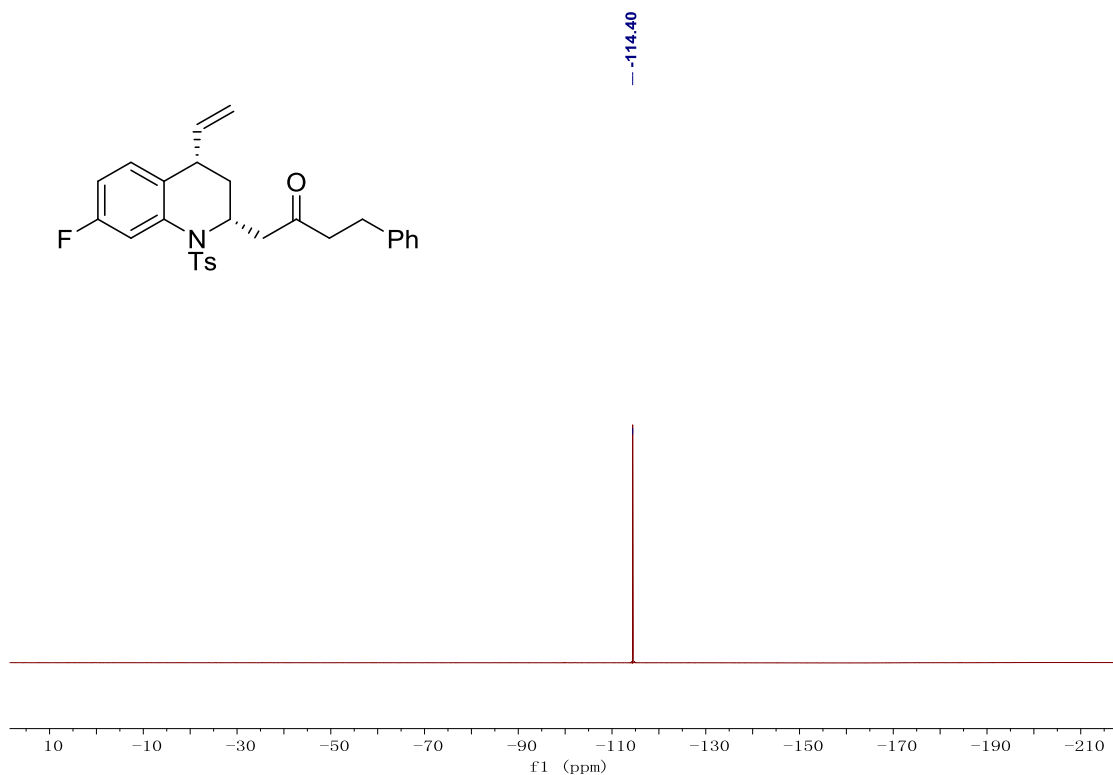

Supplementary Figure 49.  $^1\text{H}$  and  $^{13}\text{C}$  NMR  $^{19}\text{F}$  NMR of compound (R,S)-7c



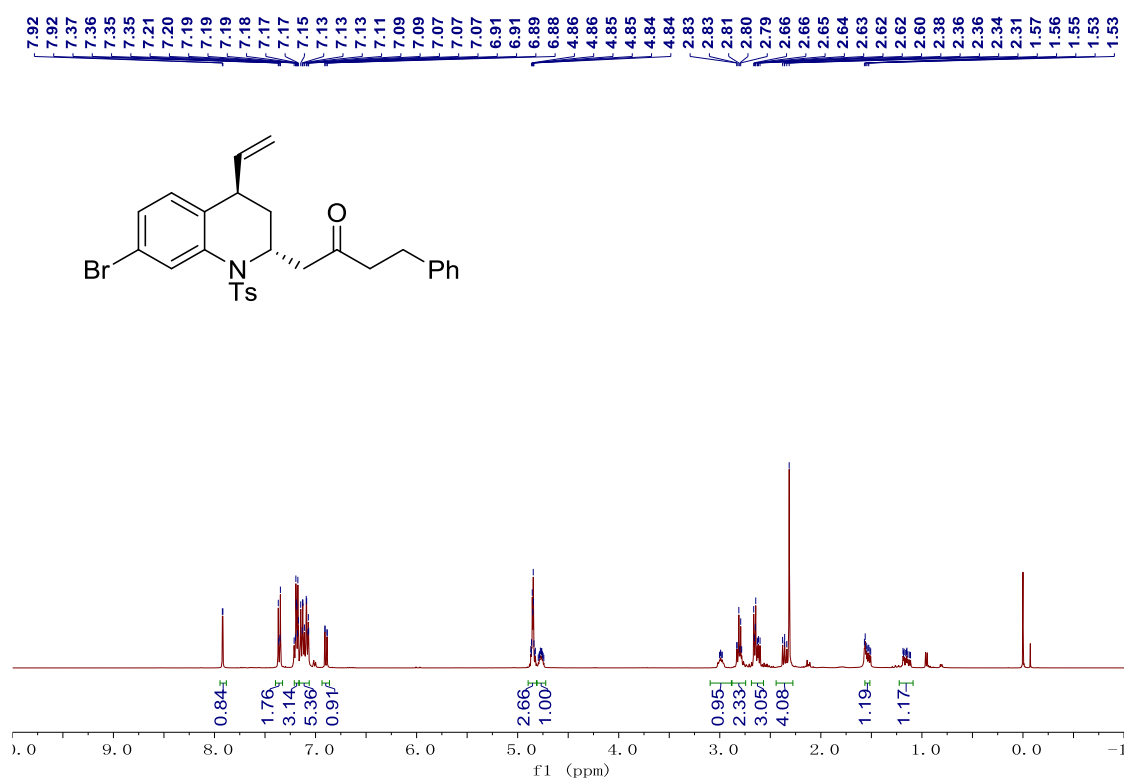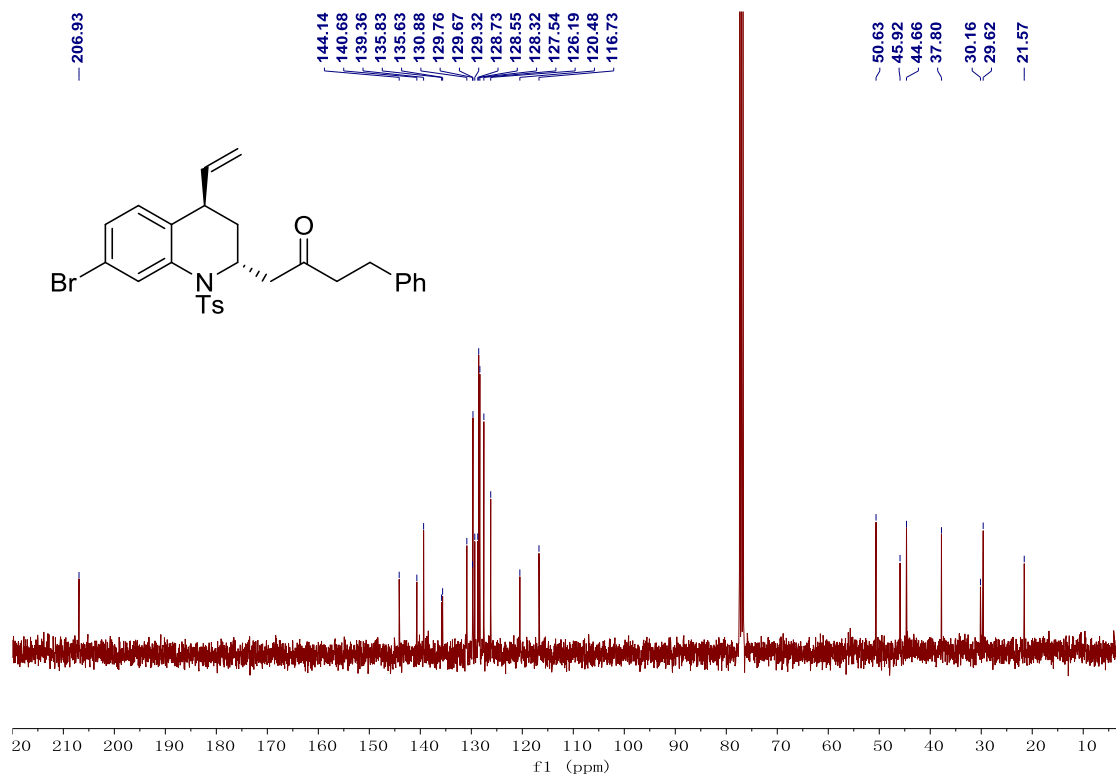

Supplementary Figure 50. <sup>1</sup>H and <sup>13</sup>C NMR of compound (R,R)-7d

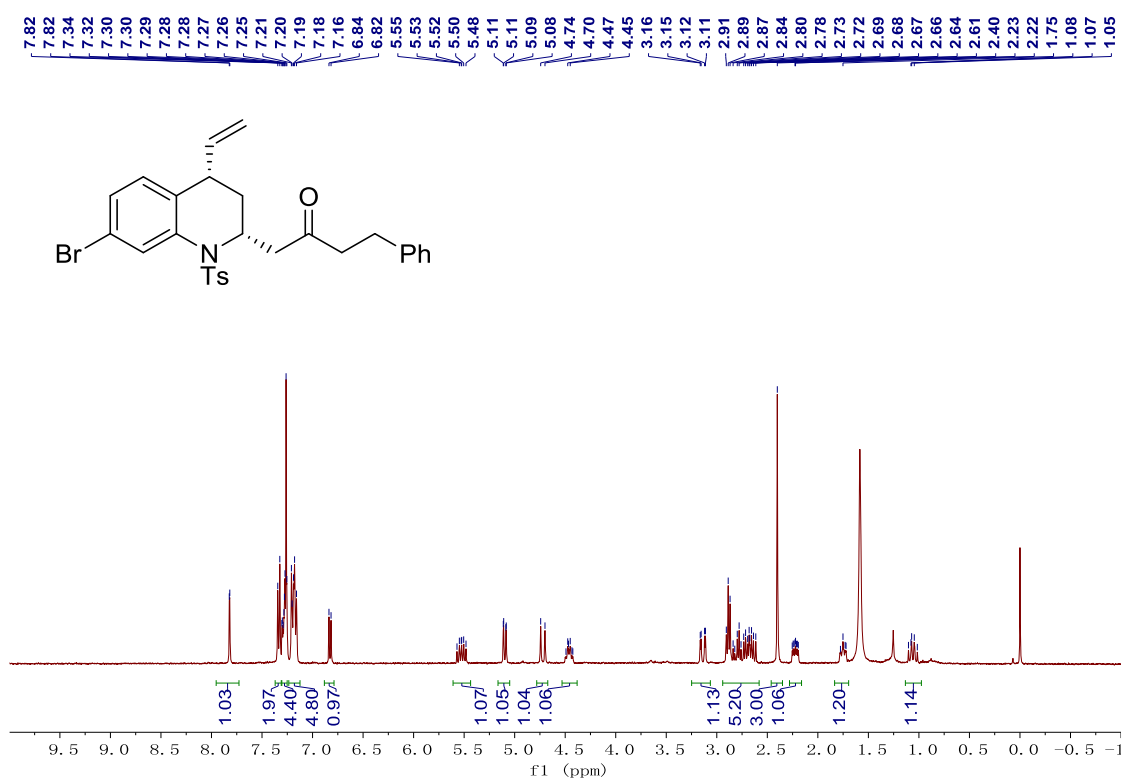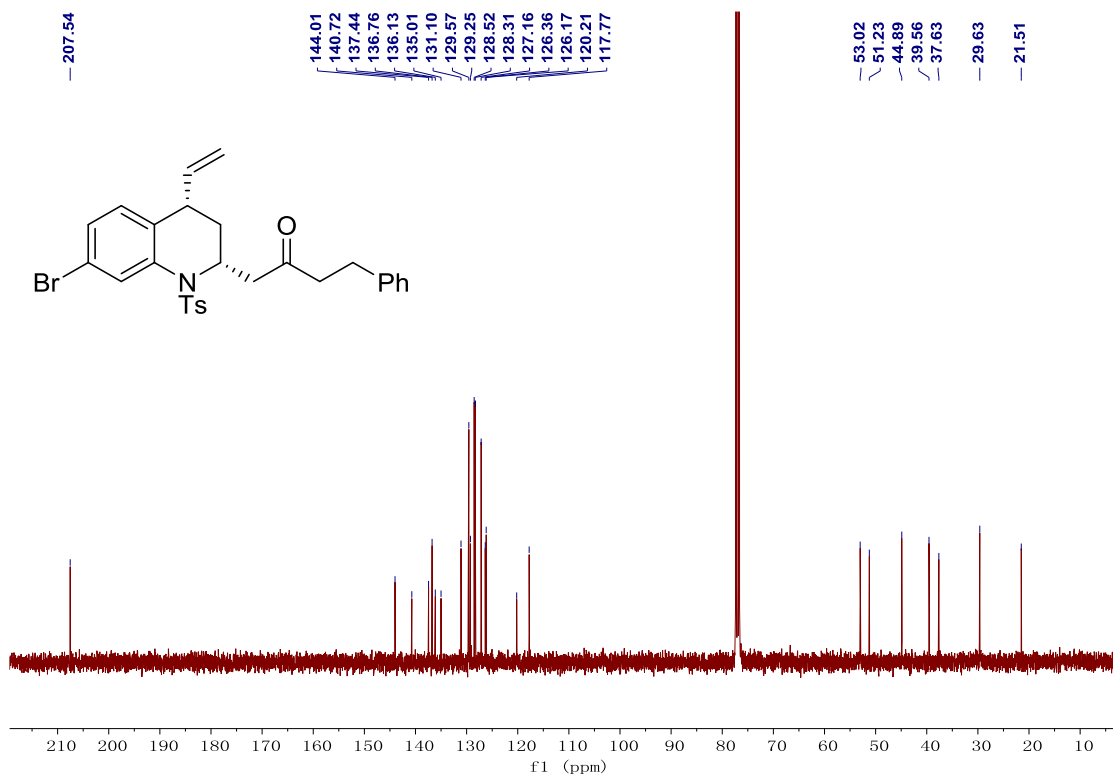

Supplementary Figure 51. <sup>1</sup>H and <sup>13</sup>C NMR of compound (R,S)-7d

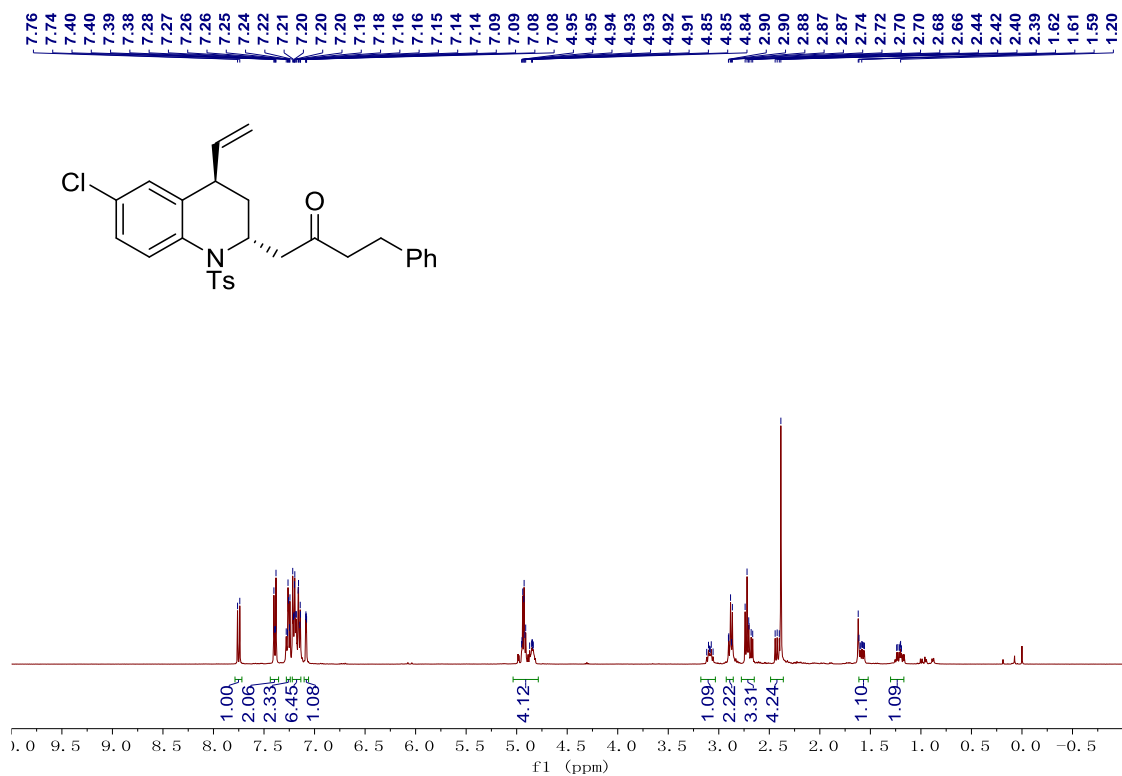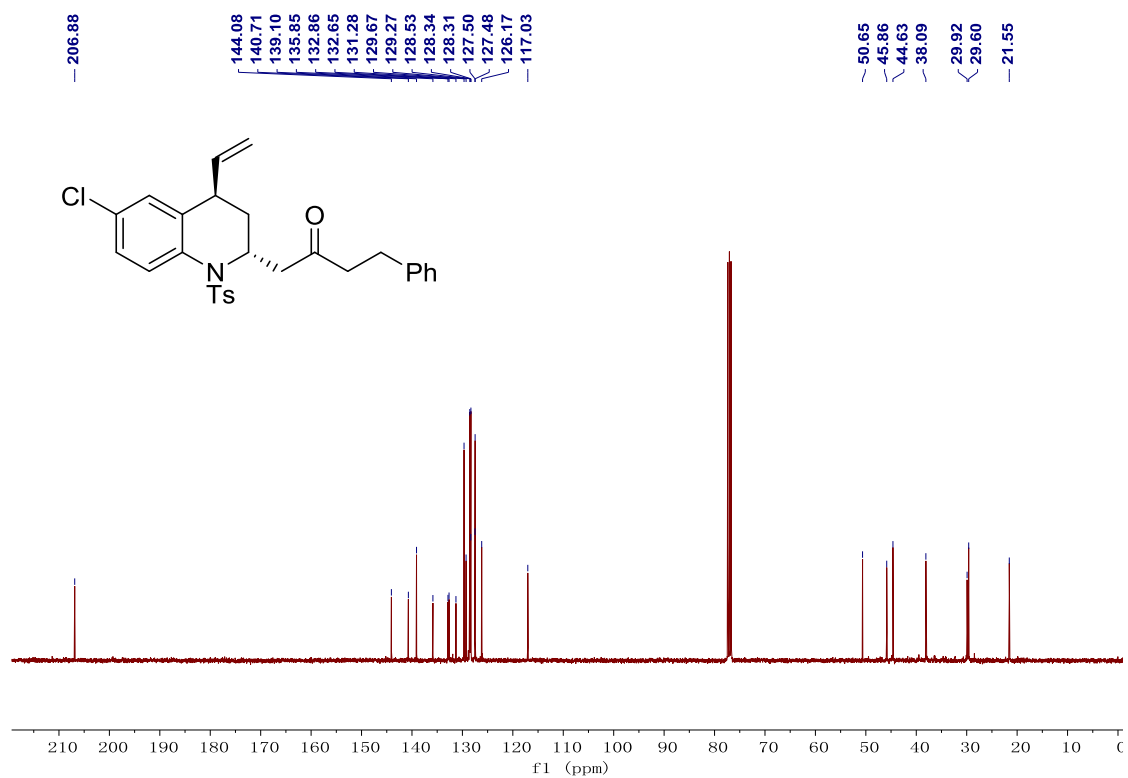

Supplementary Figure 52. <sup>1</sup>H and <sup>13</sup>C NMR of compound *(R,R)*-7e

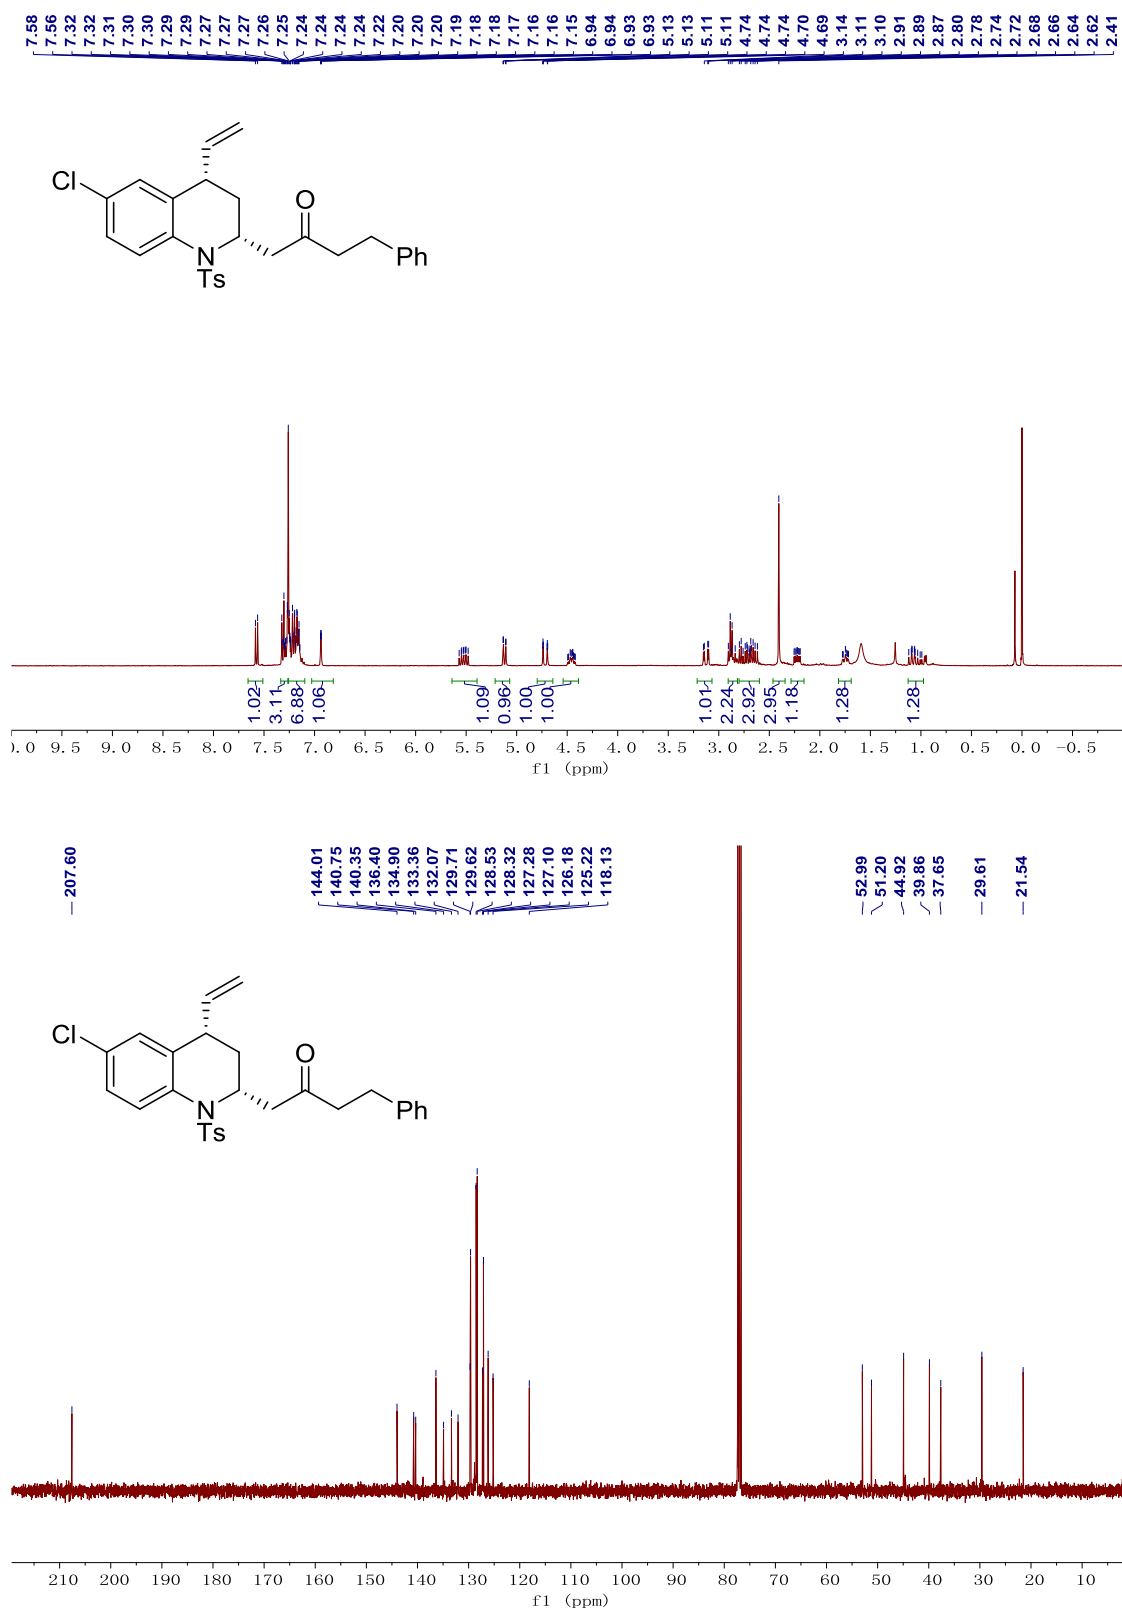

Supplementary Figure 53. <sup>1</sup>H and <sup>13</sup>C NMR of compound (R,S)-7e

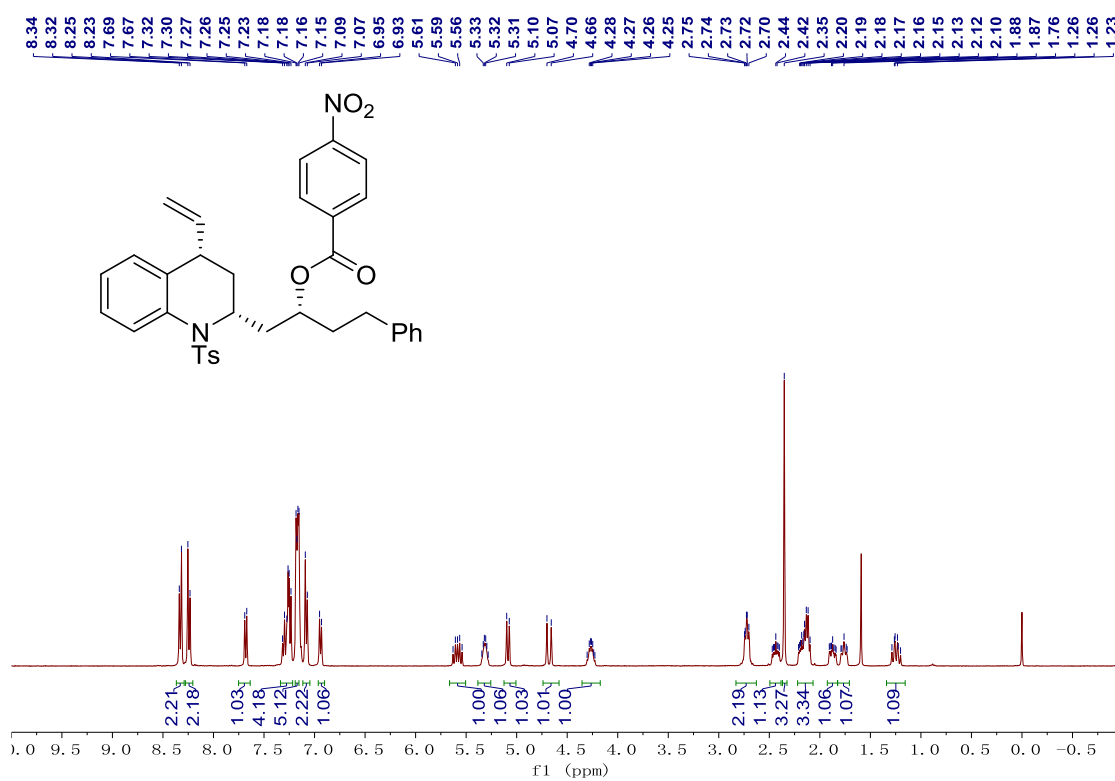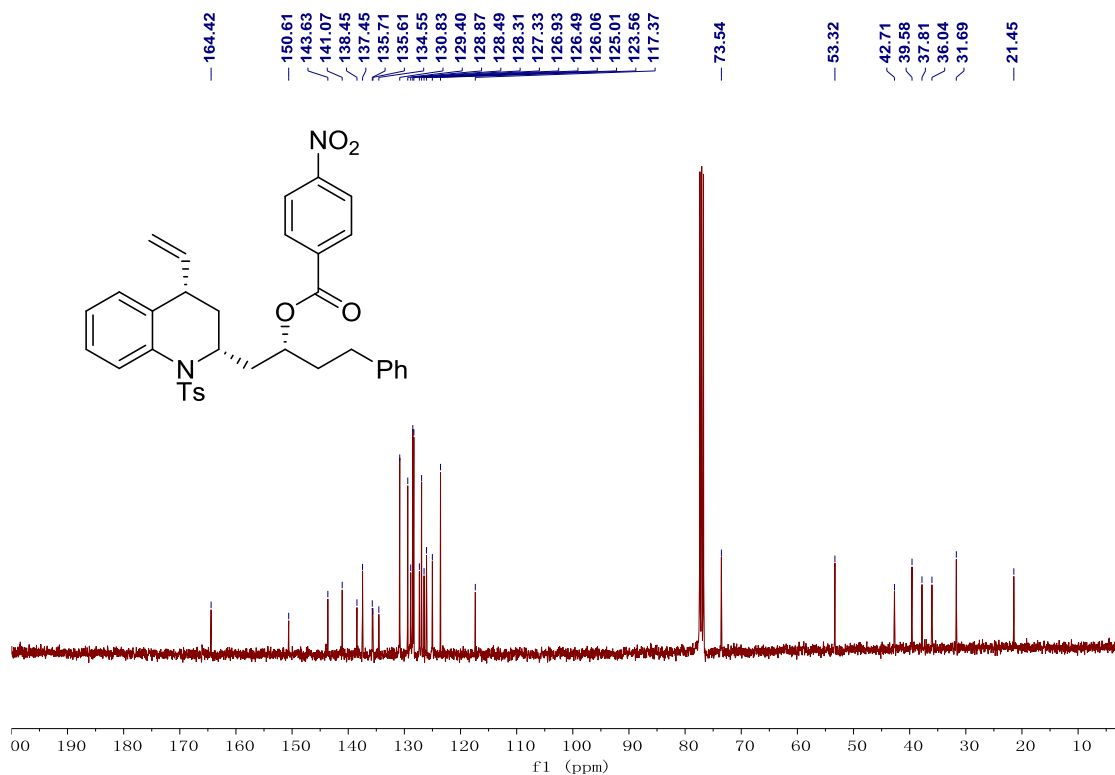

Supplementary Figure 53.  $^1\text{H}$  and  $^{13}\text{C}$  NMR of compound (R,S)-8a

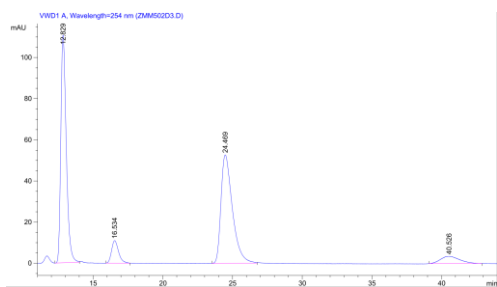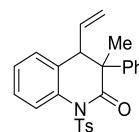

**rac-3aa**

| Peak # | RetTime [min] | Type | Width [min] | Area mAU *s | Height [mAU] | Area %  |
|--------|---------------|------|-------------|-------------|--------------|---------|
| 1      | 12.829        | VB   | 0.4170      | 3019.25000  | 110.76018    | 44.6792 |
| 2      | 16.534        | BB   | 0.5424      | 385.21014   | 11.00316     | 5.7004  |
| 3      | 24.469        | BB   | 0.8645      | 3000.66895  | 52.75665     | 44.4043 |
| 4      | 40.526        | BB   | 1.1861      | 352.48471   | 3.59979      | 5.2161  |

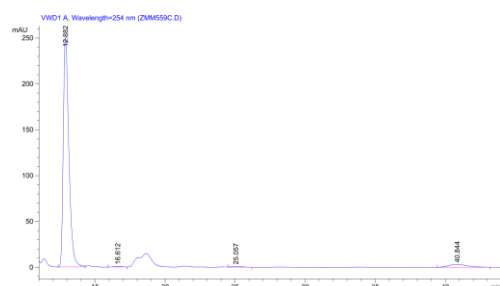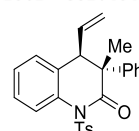

**3aa**

| Peak # | RetTime [min] | Type | Width [min] | Area mAU *s | Height [mAU] | Area %  |
|--------|---------------|------|-------------|-------------|--------------|---------|
| 1      | 12.882        | BB   | 0.4205      | 6897.28955  | 250.26718    | 94.5796 |
| 2      | 16.612        | PV   | 0.5324      | 30.51517    | 7.19916e-1   | 0.4184  |
| 3      | 25.057        | BP   | 0.6733      | 49.02715    | 9.12634e-1   | 0.6723  |
| 4      | 40.844        | BB   | 1.1960      | 315.74557   | 3.15694      | 4.3297  |

**Supplementary Figure 54. HPLC spectra for compound 3aa**

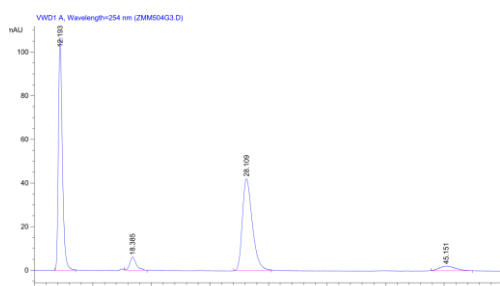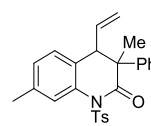

**rac-3ba**

| Peak # | RetTime [min] | Type | Width [min] | Area mAU *s | Height [mAU] | Area %  |
|--------|---------------|------|-------------|-------------|--------------|---------|
| 1      | 12.193        | BB   | 0.3600      | 2517.23364  | 106.56134    | 46.1001 |
| 2      | 18.385        | VB   | 0.5967      | 240.06221   | 6.12906      | 4.3965  |
| 3      | 28.109        | BB   | 0.9080      | 2491.75781  | 42.15371     | 45.6335 |
| 4      | 45.151        | BB   | 1.1722      | 211.31088   | 2.14570      | 3.8699  |

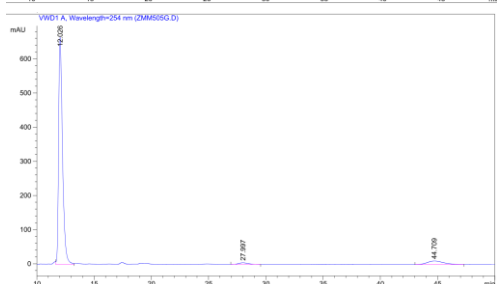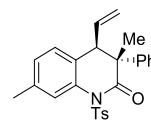

**3ba**

| Peak # | RetTime [min] | Type | Width [min] | Area mAU *s | Height [mAU] | Area %  |
|--------|---------------|------|-------------|-------------|--------------|---------|
| 1      | 12.026        | VV   | 0.3602      | 1.57094e4   | 664.75610    | 92.2014 |
| 2      | 27.997        | BB   | 0.8567      | 296.47211   | 4.88400      | 1.7401  |
| 3      | 44.709        | BB   | 1.4098      | 1032.25354  | 10.38739     | 6.0585  |

**Supplementary Figure 55. HPLC spectra for compound 3ba**

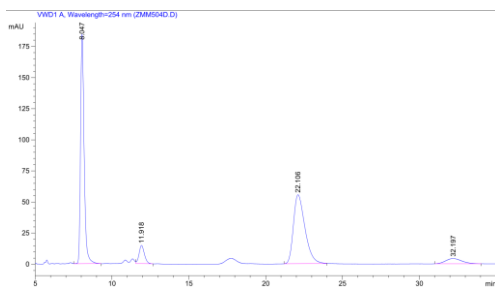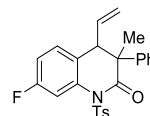

**rac-3ca**

| Peak # | RetTime [min] | Type | Width [min] | Area mAU *s | Height [mAU] | Area %  |
|--------|---------------|------|-------------|-------------|--------------|---------|
| 1      | 8.047         | VB   | 0.2489      | 3017.40430  | 184.59630    | 45.8119 |
| 2      | 11.918        | VP   | 0.3730      | 358.26083   | 14.78578     | 5.4393  |
| 3      | 22.106        | BB   | 0.8043      | 2897.93652  | 55.49719     | 43.9981 |
| 4      | 32.197        | BB   | 0.9575      | 312.90143   | 4.23806      | 4.7506  |

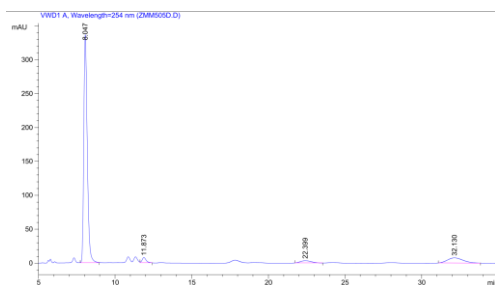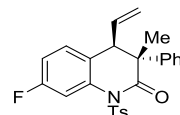

**3ca**

| Peak # | RetTime [min] | Type | Width [min] | Area mAU *s | Height [mAU] | Area %  |
|--------|---------------|------|-------------|-------------|--------------|---------|
| 1      | 8.047         | BB   | 0.2428      | 5318.38379  | 336.24030    | 85.8639 |
| 2      | 11.873        | VP   | 0.2786      | 144.97568   | 7.88538      | 2.3406  |
| 3      | 22.399        | BP   | 0.7065      | 174.13576   | 3.47730      | 2.8114  |
| 4      | 32.130        | BB   | 1.0614      | 556.47229   | 7.72771      | 8.9841  |

**Supplementary Figure S6. HPLC spectra for compound 3ca**

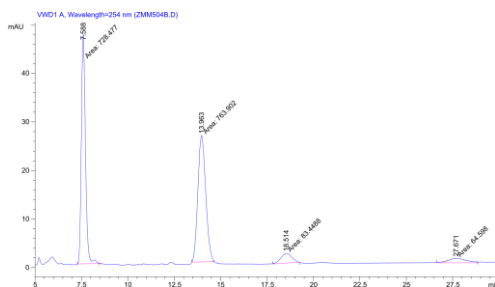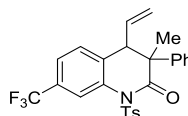

**rac-3da**

| Peak # | RetTime [min] | Type | Width [min] | Area mAU *s | Height [mAU] | Area %  |
|--------|---------------|------|-------------|-------------|--------------|---------|
| 1      | 7.588         | MM   | 0.2569      | 728.47650   | 47.26527     | 44.4078 |
| 2      | 13.963        | MM   | 0.4895      | 763.90155   | 26.01132     | 46.5673 |
| 3      | 18.514        | MM   | 0.6927      | 83.44875    | 2.00768      | 5.0870  |
| 4      | 27.671        | MM   | 1.1610      | 64.59799    | 9.27333e-1   | 3.9379  |

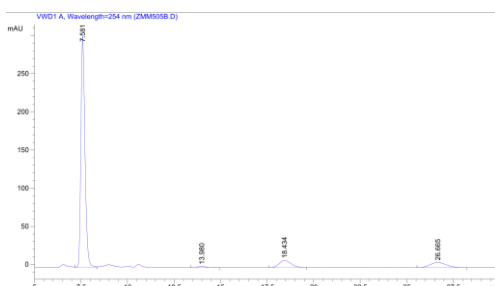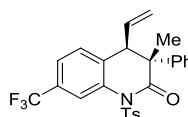

**3da**

| Peak # | RetTime [min] | Type | Width [min] | Area mAU *s | Height [mAU] | Area %  |
|--------|---------------|------|-------------|-------------|--------------|---------|
| 1      | 7.581         | VV   | 0.2348      | 4625.12305  | 303.18365    | 84.0022 |
| 2      | 13.980        | PP   | 0.4137      | 47.21975    | 1.52463      | 0.8576  |
| 3      | 18.434        | BB   | 0.6590      | 420.43088   | 9.50075      | 7.6359  |
| 4      | 26.665        | BB   | 0.7646      | 413.17889   | 6.79603      | 7.5042  |

**Supplementary Figure S7. HPLC spectra for compound 3da**

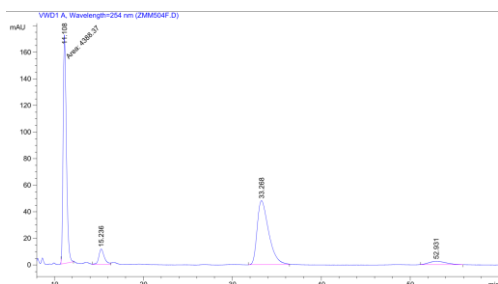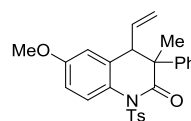

**rac-3ea**

| Peak # | RetTime [min] | Type | Width [min] | Area mAU *s | Height [mAU] | Area %  |
|--------|---------------|------|-------------|-------------|--------------|---------|
| 1      | 11.108        | MM   | 0.4250      | 4388.36719  | 172.08061    | 45.7480 |
| 2      | 15.236        | VB   | 0.6441      | 501.62622   | 11.60527     | 5.2294  |
| 3      | 33.268        | PB   | 1.3712      | 4338.40674  | 48.16424     | 45.2271 |
| 4      | 52.931        | BB   | 1.6282      | 364.08331   | 2.62756      | 3.7955  |

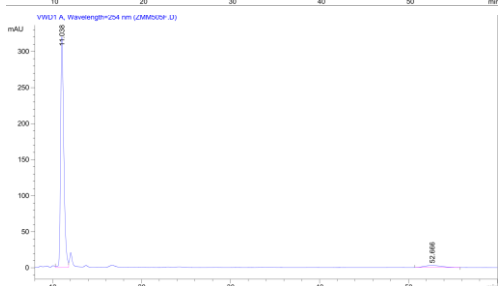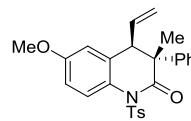

**3ea**

| Peak # | RetTime [min] | Type | Width [min] | Area mAU *s | Height [mAU] | Area %  |
|--------|---------------|------|-------------|-------------|--------------|---------|
| 1      | 11.038        | VV   | 0.3816      | 7995.24609  | 320.12686    | 95.1867 |
| 2      | 52.666        | BB   | 1.6289      | 404.29721   | 2.93770      | 4.8133  |

**Supplementary Figure 58. HPLC spectra for compound 3ea**

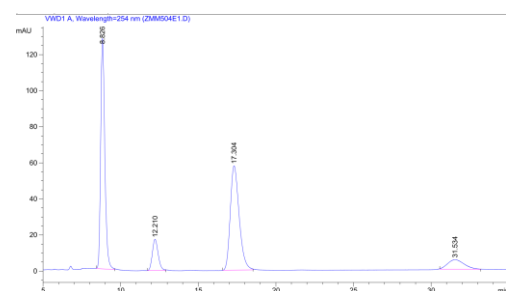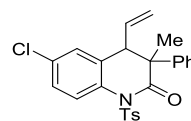

**rac-3fa**

| Peak # | RetTime [min] | Type | Width [min] | Area mAU *s | Height [mAU] | Area %  |
|--------|---------------|------|-------------|-------------|--------------|---------|
| 1      | 8.826         | BB   | 0.2825      | 2362.42651  | 127.85316    | 42.8047 |
| 2      | 12.210        | BB   | 0.4077      | 454.47931   | 17.34034     | 8.2347  |
| 3      | 17.304        | BB   | 0.6164      | 2308.03979  | 57.91314     | 41.8193 |
| 4      | 31.534        | BB   | 1.0408      | 394.13620   | 5.29144      | 7.1413  |

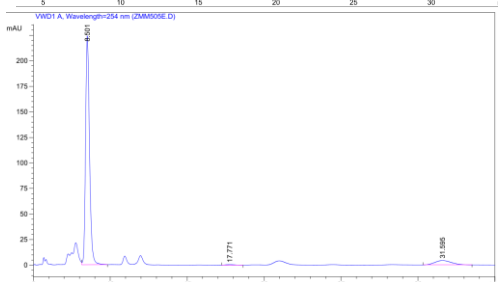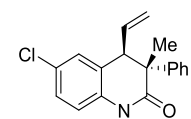

**3fa**

| Peak # | RetTime [min] | Type | Width [min] | Area mAU *s | Height [mAU] | Area %  |
|--------|---------------|------|-------------|-------------|--------------|---------|
| 1      | 8.501         | VP   | 0.2712      | 3978.37256  | 224.02928    | 91.7451 |
| 2      | 17.771        | BP   | 0.4568      | 24.65322    | 6.63431e-1   | 0.5685  |
| 3      | 31.595        | BB   | 1.0097      | 333.30667   | 4.35325      | 7.6864  |

**Supplementary Figure 59. HPLC spectra for compound 3ea**



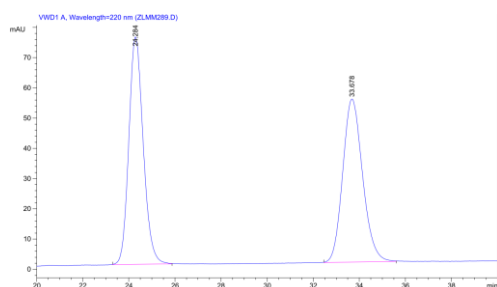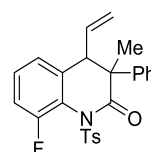

**rac-3ga**

| Peak # | RetTime [min] | Type | Width [min] | Area mAU *s | Height [mAU] | Area %  |
|--------|---------------|------|-------------|-------------|--------------|---------|
| 1      | 24.284        | BB   | 0.6669      | 3268.51733  | 75.25383     | 50.2925 |
| 2      | 33.678        | BB   | 0.9315      | 3230.49194  | 53.95710     | 49.7075 |

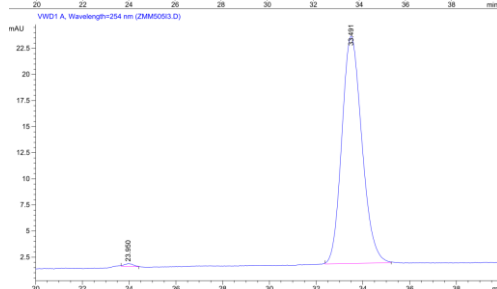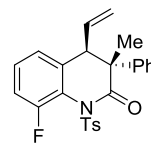

**3ga**

| Peak # | RetTime [min] | Type | Width [min] | Area mAU *s | Height [mAU] | Area %  |
|--------|---------------|------|-------------|-------------|--------------|---------|
| 1      | 23.950        | BB   | 0.3387      | 7.67444     | 2.76225e-1   | 0.5871  |
| 2      | 33.491        | BB   | 0.9231      | 1299.46375  | 21.78459     | 99.4129 |

**Supplementary Figure 60. HPLC spectra for compound 3ga**

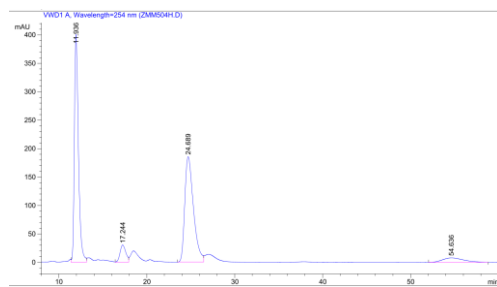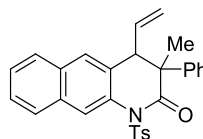

**rac-3ha**

| Peak # | RetTime [min] | Type | Width [min] | Area mAU *s | Height [mAU] | Area %  |
|--------|---------------|------|-------------|-------------|--------------|---------|
| 1      | 11.936        | VV   | 0.4843      | 1.28382e4   | 400.89816    | 45.3830 |
| 2      | 17.244        | VV   | 0.7007      | 1392.86072  | 30.22412     | 4.9237  |
| 3      | 24.689        | BV   | 1.0503      | 1.27226e4   | 185.57683    | 44.9741 |
| 4      | 54.636        | BB   | 1.9988      | 1335.00452  | 7.86087      | 4.7192  |

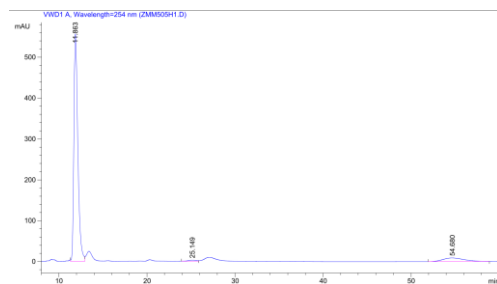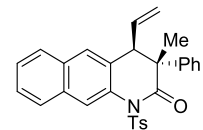

**3ha**

| Peak # | RetTime [min] | Type | Width [min] | Area mAU *s | Height [mAU] | Area %  |
|--------|---------------|------|-------------|-------------|--------------|---------|
| 1      | 11.863        | VV   | 0.4810      | 1.75333e4   | 556.66711    | 91.2276 |
| 2      | 25.149        | BV   | 0.8203      | 170.96066   | 2.53954      | 0.8895  |
| 3      | 54.680        | BB   | 2.0188      | 1515.02881  | 8.90974      | 7.8829  |

**Supplementary Figure 61. HPLC spectra for compound 3ha**

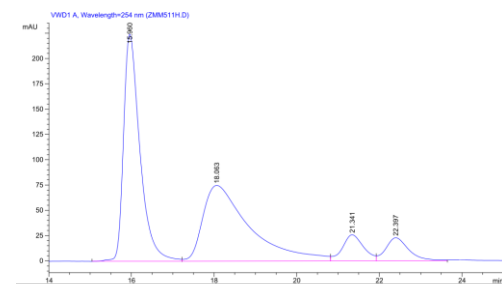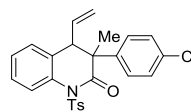

**rac-3ab**

| Peak # | RetTime [min] | Type | Width [min] | Area mAU *s | Height [mAU] | Area %  |
|--------|---------------|------|-------------|-------------|--------------|---------|
| 1      | 15.960        | VV   | 0.4204      | 6170.30908  | 224.01115    | 44.4307 |
| 2      | 18.063        | VV   | 1.1341      | 5896.81299  | 74.88830     | 42.4613 |
| 3      | 21.341        | VV   | 0.5362      | 920.61987   | 25.94805     | 6.6291  |
| 4      | 22.397        | VV   | 0.5847      | 899.74976   | 22.99176     | 6.4788  |

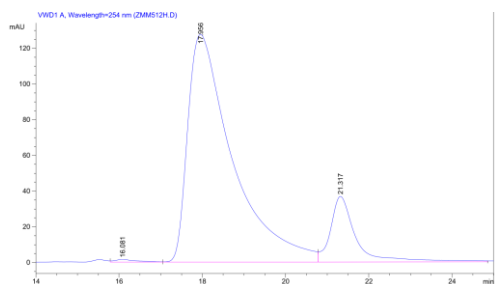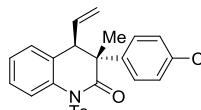

**3ab**

| Peak # | RetTime [min] | Type | Width [min] | Area mAU *s | Height [mAU] | Area %  |
|--------|---------------|------|-------------|-------------|--------------|---------|
| 1      | 16.881        | VV   | 0.5310      | 57.25276    | 1.50574      | 0.5076  |
| 2      | 17.956        | VV   | 1.0864      | 9525.02148  | 127.59405    | 84.4458 |
| 3      | 21.317        | VB   | 0.6240      | 1581.67493  | 36.77786     | 14.0226 |

**Supplementary Figure 62. HPLC spectra for compound 3ab**

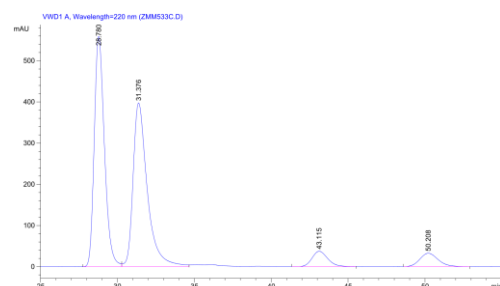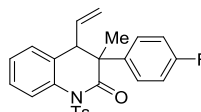

**rac-3ac**

| Peak # | RetTime [min] | Type | Width [min] | Area mAU *s | Height [mAU] | Area %  |
|--------|---------------|------|-------------|-------------|--------------|---------|
| 1      | 28.780        | BV   | 0.7105      | 2.56864e4   | 559.31635    | 45.4085 |
| 2      | 31.376        | VV   | 0.9598      | 2.55814e4   | 397.85489    | 45.2229 |
| 3      | 43.115        | VB   | 1.0932      | 2628.51367  | 37.15559     | 4.6467  |
| 4      | 50.208        | BB   | 1.2784      | 2671.03540  | 32.32900     | 4.7219  |

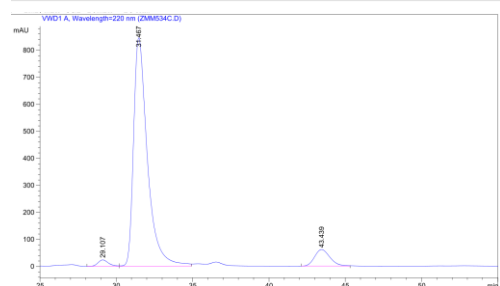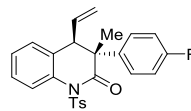

**3ac**

| Peak # | RetTime [min] | Type | Width [min] | Area mAU *s | Height [mAU] | Area %  |
|--------|---------------|------|-------------|-------------|--------------|---------|
| 1      | 29.107        | VV   | 0.7299      | 1146.68091  | 23.84840     | 1.9491  |
| 2      | 31.467        | VB   | 0.9457      | 5.33263e4   | 845.26385    | 90.6418 |
| 3      | 43.439        | BB   | 1.0931      | 4358.92920  | 61.62622     | 7.4091  |

**Supplementary Figure 63. HPLC spectra for compound 3ac**

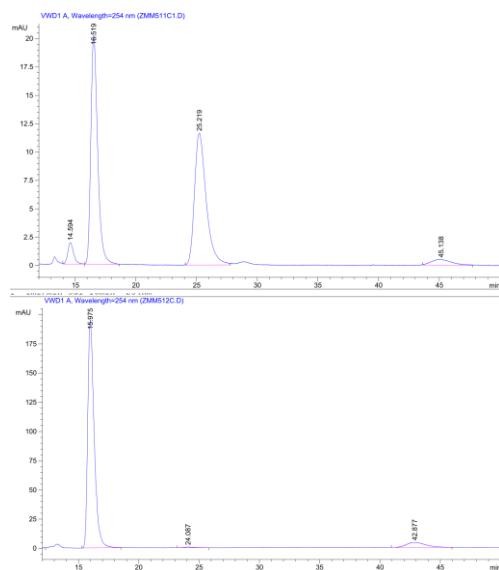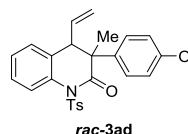

| Peak # | RetTime [min] | Type | Width [min] | Area mAU *s | Height [mAU] | Area %  |
|--------|---------------|------|-------------|-------------|--------------|---------|
| 1      | 14.594        | VV   | 0.5278      | 64.46522    | 1.90981      | 3.8055  |
| 2      | 16.519        | VB   | 0.5968      | 789.90771   | 20.16554     | 46.6292 |
| 3      | 25.219        | BB   | 1.0096      | 780.51923   | 11.63795     | 46.0750 |
| 4      | 45.138        | BB   | 1.4264      | 59.12638    | 4.99920e-1   | 3.4903  |

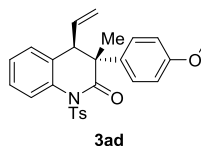

| Peak # | RetTime [min] | Type | Width [min] | Area mAU *s | Height [mAU] | Area %  |
|--------|---------------|------|-------------|-------------|--------------|---------|
| 1      | 15.975        | BB   | 0.5651      | 7207.80273  | 195.05762    | 93.0700 |
| 2      | 24.087        | BB   | 0.8826      | 42.23787    | 6.33608e-1   | 0.5454  |
| 3      | 42.877        | BB   | 1.6684      | 494.45731   | 4.37351      | 6.3846  |

Supplementary Figure 64. HPLC spectra for compound 3ad

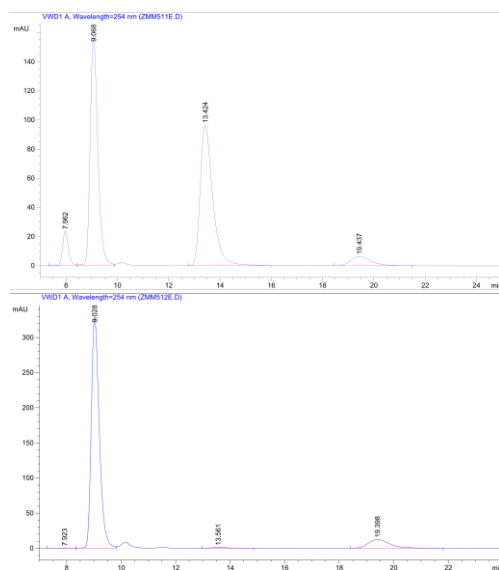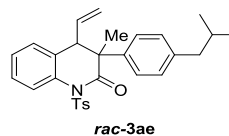

| Peak # | RetTime [min] | Type | Width [min] | Area mAU *s | Height [mAU] | Area %  |
|--------|---------------|------|-------------|-------------|--------------|---------|
| 1      | 7.962         | BV   | 0.2497      | 388.48419   | 23.67733     | 5.3152  |
| 2      | 9.068         | VV   | 0.3190      | 3281.20874  | 157.33272    | 44.8935 |
| 3      | 13.424        | BB   | 0.5192      | 3284.08789  | 96.53359     | 44.9329 |
| 4      | 19.437        | BB   | 0.8522      | 355.09689   | 6.33283      | 4.8584  |

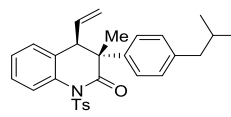

| Peak # | RetTime [min] | Type | Width [min] | Area mAU *s | Height [mAU] | Area %  |
|--------|---------------|------|-------------|-------------|--------------|---------|
| 1      | 7.923         | VV   | 0.5539      | 23.56730    | 5.75009e-1   | 0.3146  |
| 2      | 9.028         | VV   | 0.3146      | 6727.27734  | 328.61105    | 89.7891 |
| 3      | 13.561        | BB   | 0.5899      | 53.36420    | 1.31520      | 0.7123  |
| 4      | 19.398        | BB   | 0.8536      | 688.09668   | 12.35536     | 9.1840  |

Supplementary Figure 65. HPLC spectra for compound 3ae

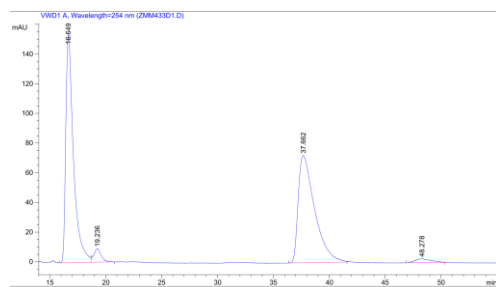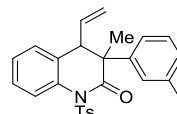

**rac-3af**

| Peak # | RetTime [min] | Type | Width [min] | Area mAU *s | Height [mAU] | Area %  |
|--------|---------------|------|-------------|-------------|--------------|---------|
| 1      | 16.649        | VV   | 0.7073      | 7350.55908  | 153.47284    | 47.7139 |
| 2      | 19.236        | VP   | 0.6775      | 419.48761   | 9.10114      | 2.7230  |
| 3      | 37.662        | PB   | 1.5143      | 7365.80029  | 72.32408     | 47.8128 |
| 4      | 48.278        | BB   | 1.2498      | 269.65363   | 2.61466      | 1.7504  |

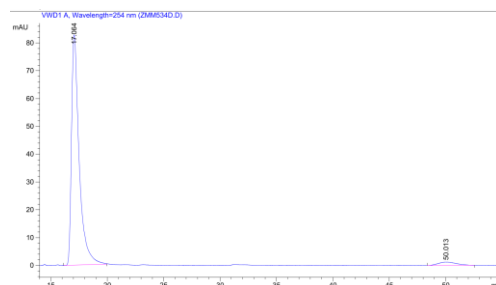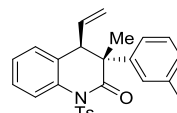

**3af**

| Peak # | RetTime [min] | Type | Width [min] | Area mAU *s | Height [mAU] | Area %  |
|--------|---------------|------|-------------|-------------|--------------|---------|
| 1      | 17.064        | VB   | 0.6948      | 3921.42432  | 82.85799     | 96.5794 |
| 2      | 50.013        | BB   | 1.3431      | 138.88678   | 1.22231      | 3.4206  |

**Supplementary Figure 66. HPLC spectra for compound 3af**

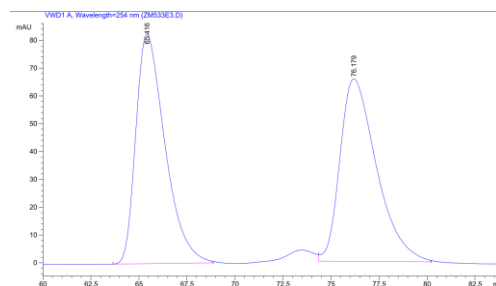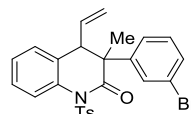

**rac-3ag**

| Peak # | RetTime [min] | Type | Width [min] | Area mAU *s | Height [mAU] | Area %  |
|--------|---------------|------|-------------|-------------|--------------|---------|
| 1      | 65.416        | PB   | 1.5823      | 8700.77539  | 82.33353     | 49.9939 |
| 2      | 76.179        | VB   | 2.0170      | 8702.91016  | 65.70599     | 50.0061 |

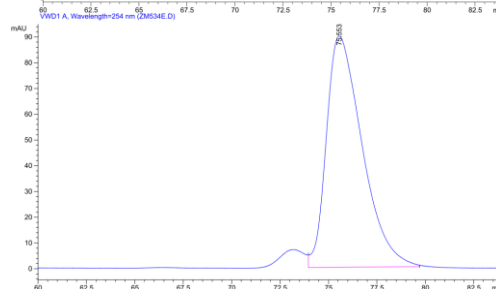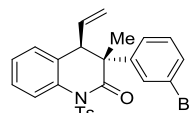

**3ag**

| Peak # | RetTime [min] | Type | Width [min] | Area mAU *s | Height [mAU] | Area %   |
|--------|---------------|------|-------------|-------------|--------------|----------|
| 1      | 75.553        | VB   | 1.8811      | 1.15236e4   | 89.82242     | 100.0000 |

**Supplementary Figure 67. HPLC spectra for compound 3ag**

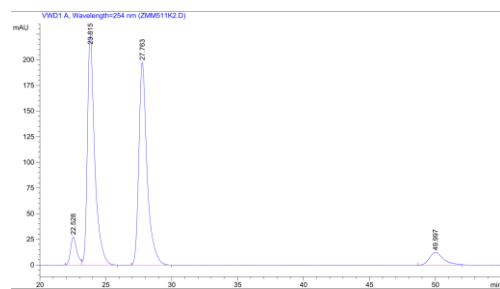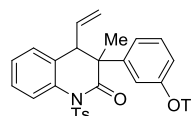

**rac-3ah**

| Peak # | RetTime [min] | Type | Width [min] | Area mAU *s | Height [mAU] | Area %  |
|--------|---------------|------|-------------|-------------|--------------|---------|
| 1      | 22.528        | BV   | 0.5059      | 916.57990   | 27.45938     | 4.8028  |
| 2      | 23.815        | VB   | 0.5718      | 8634.72949  | 224.13577    | 45.2451 |
| 3      | 27.763        | BP   | 0.6519      | 8580.56152  | 197.70473    | 44.9613 |
| 4      | 49.997        | BB   | 1.1577      | 952.45154   | 12.40644     | 4.9908  |

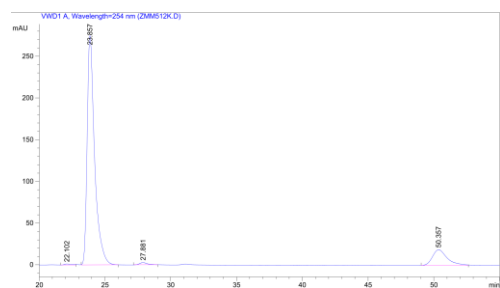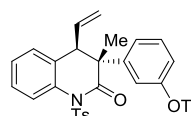

**3ah**

| Peak # | RetTime [min] | Type | Width [min] | Area mAU *s | Height [mAU] | Area %  |
|--------|---------------|------|-------------|-------------|--------------|---------|
| 1      | 22.101        | PB   | 0.5567      | 50.10389    | 1.23768      | 0.4043  |
| 2      | 23.856        | BB   | 0.5833      | 1.07893e4   | 274.77734    | 87.0694 |
| 3      | 27.882        | BB   | 0.6237      | 118.78265   | 2.76370      | 0.9586  |
| 4      | 50.357        | BB   | 1.1453      | 1433.43738  | 18.68890     | 11.5677 |

**Supplementary Figure 68. HPLC spectra for compound 3ah**

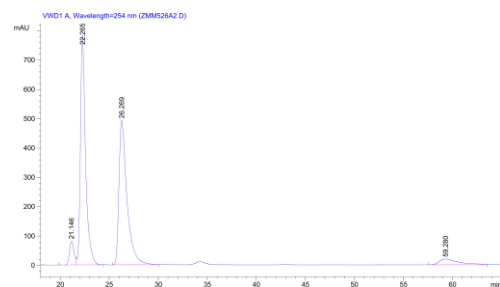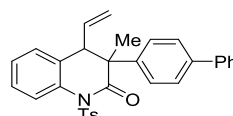

**rac-3ai**

| Peak # | RetTime [min] | Type | Width [min] | Area mAU *s | Height [mAU] | Area %  |
|--------|---------------|------|-------------|-------------|--------------|---------|
| 1      | 21.146        | BV   | 0.4940      | 2639.69263  | 81.58481     | 4.2555  |
| 2      | 22.265        | VB   | 0.5505      | 2.87464e4   | 783.20276    | 46.3429 |
| 3      | 26.269        | BB   | 0.8358      | 2.79239e4   | 492.81750    | 45.0169 |
| 4      | 59.280        | BB   | 1.9741      | 2719.84692  | 19.74302     | 4.3847  |

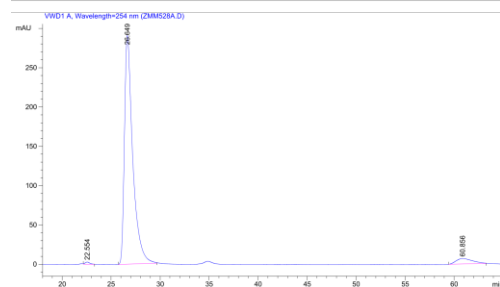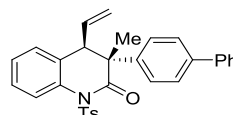

**3ai**

| Peak # | RetTime [min] | Type | Width [min] | Area mAU *s | Height [mAU] | Area %  |
|--------|---------------|------|-------------|-------------|--------------|---------|
| 1      | 22.554        | BB   | 0.4822      | 101.84451   | 2.94392      | 0.5656  |
| 2      | 26.649        | BB   | 0.8626      | 1.70745e4   | 290.83722    | 94.8246 |
| 3      | 60.856        | BB   | 1.4055      | 830.05676   | 6.99150      | 4.6098  |

**Supplementary Figure 69. HPLC spectra for compound 3ai**

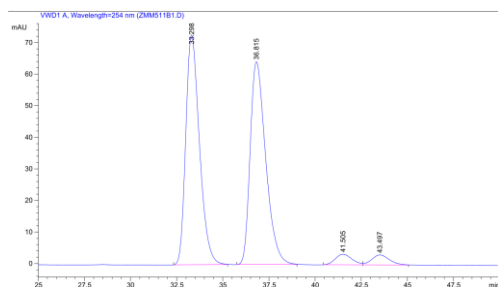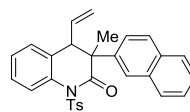

**rac-3aj**

| Peak # | RetTime [min] | Type | Width [min] | Area mAU *s | Height [mAU] | Area %  |
|--------|---------------|------|-------------|-------------|--------------|---------|
| 1      | 33.298        | BB   | 0.7909      | 3755.62793  | 72.82802     | 47.2929 |
| 2      | 36.815        | BB   | 0.8985      | 3759.90063  | 64.22576     | 47.3467 |
| 3      | 41.505        | BV   | 0.8768      | 212.68481   | 3.38016      | 2.6782  |
| 4      | 43.497        | VB   | 0.8835      | 213.00058   | 3.19116      | 2.6822  |

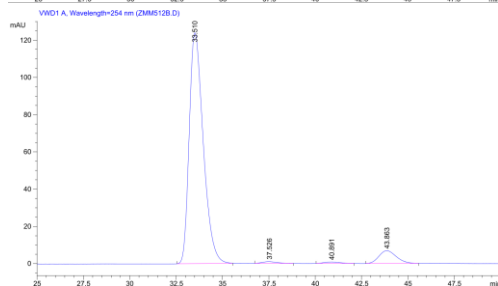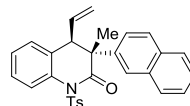

**3aj**

| Peak # | RetTime [min] | Type | Width [min] | Area mAU *s | Height [mAU] | Area %  |
|--------|---------------|------|-------------|-------------|--------------|---------|
| 1      | 33.510        | BB   | 0.8112      | 6519.43262  | 124.04102    | 92.0568 |
| 2      | 37.526        | BB   | 0.6939      | 56.23063    | 9.74065e-1   | 0.7940  |
| 3      | 40.891        | BB   | 0.7515      | 52.85619    | 8.46834e-1   | 0.7463  |
| 4      | 43.863        | BB   | 0.9609      | 453.44974   | 6.90821      | 6.4029  |

**Supplementary Figure 70. HPLC spectra for compound 3aj**

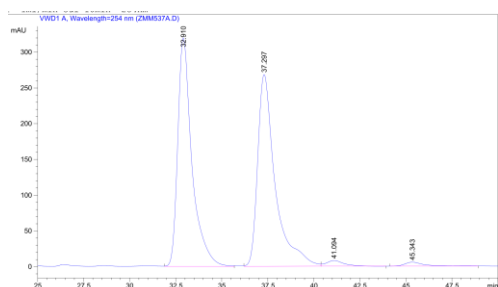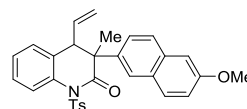

**rac-3ak**

| Peak # | RetTime [min] | Type | Width [min] | Area mAU *s | Height [mAU] | Area %  |
|--------|---------------|------|-------------|-------------|--------------|---------|
| 1      | 32.910        | BB   | 0.7867      | 1.70879e4   | 319.68967    | 47.7071 |
| 2      | 37.297        | BV   | 0.9699      | 1.77534e4   | 268.33832    | 49.5651 |
| 3      | 41.094        | VB   | 0.9798      | 543.79852   | 8.11517      | 1.5182  |
| 4      | 45.343        | BB   | 1.1004      | 433.26846   | 5.67482      | 1.2096  |

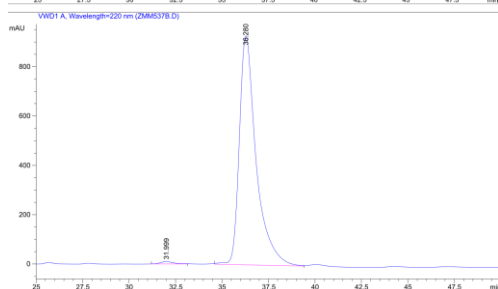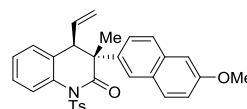

**3ak**

| Peak # | RetTime [min] | Type | Width [min] | Area mAU *s | Height [mAU] | Area %  |
|--------|---------------|------|-------------|-------------|--------------|---------|
| 1      | 31.999        | BB   | 0.7777      | 503.30444   | 9.73860      | 0.8552  |
| 2      | 36.280        | BB   | 0.9310      | 5.83500e4   | 928.74622    | 99.1448 |

**Supplementary Figure 71. HPLC spectra for compound 3ak**

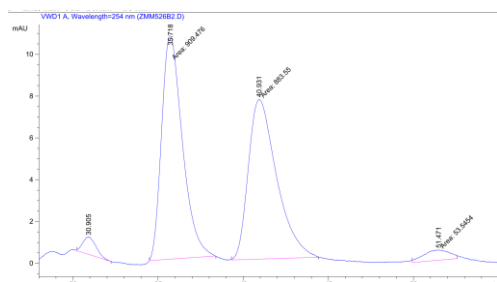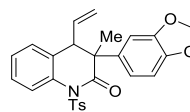

**rac-3al**

| Peak # | RetTime [min] | Type | Width [min] | Area mAU *s | Height [mAU] | Area %  |
|--------|---------------|------|-------------|-------------|--------------|---------|
| 1      | 30.905        | BP   | 0.6535      | 45.33552    | 8.27740e-1   | 2.3963  |
| 2      | 35.718        | MM   | 1.4193      | 909.47620   | 10.68007     | 48.0719 |
| 3      | 40.931        | MM   | 1.9251      | 883.55048   | 7.64957      | 46.7016 |
| 4      | 51.471        | MM   | 1.8150      | 53.54545    | 4.91694e-1   | 2.8302  |

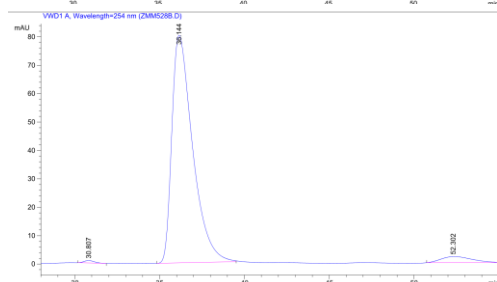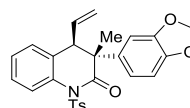

**3al**

| Peak # | RetTime [min] | Type | Width [min] | Area mAU *s | Height [mAU] | Area %  |
|--------|---------------|------|-------------|-------------|--------------|---------|
| 1      | 30.807        | BP   | 0.5399      | 37.76793    | 8.88021e-1   | 0.5275  |
| 2      | 36.144        | BB   | 1.2766      | 6833.99951  | 80.20164     | 95.4561 |
| 3      | 52.302        | BB   | 1.5275      | 287.54547   | 2.24755      | 4.0164  |

**Supplementary Figure 72. HPLC spectra for compound 3al**

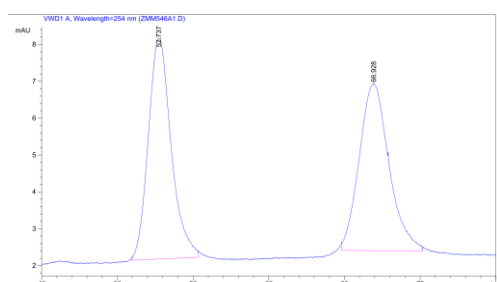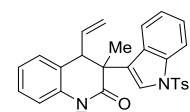

**rac-3am**

| Peak # | RetTime [min] | Type | Width [min] | Area mAU *s | Height [mAU] | Area %  |
|--------|---------------|------|-------------|-------------|--------------|---------|
| 1      | 52.737        | BB   | 1.5225      | 626.97443   | 5.99749      | 50.2350 |
| 2      | 66.928        | BB   | 1.8825      | 621.10834   | 4.52054      | 49.7650 |

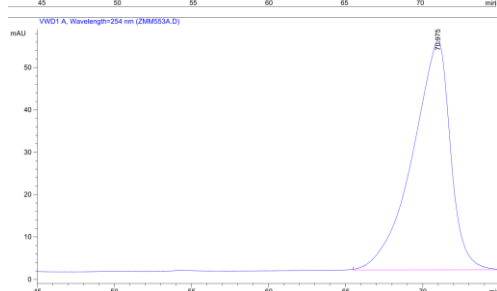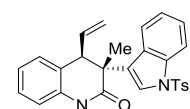

**3am**

| Peak # | RetTime [min] | Type | Width [min] | Area mAU *s | Height [mAU] | Area %   |
|--------|---------------|------|-------------|-------------|--------------|----------|
| 1      | 70.975        | BB   | 2.4170      | 9221.62891  | 54.01432     | 100.0000 |

**Supplementary Figure 73. HPLC spectra for compound 3am**

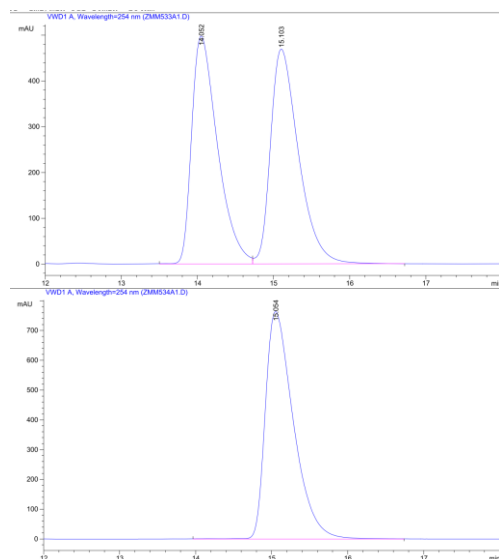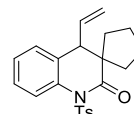

**rac-3an**

| Peak # | RetTime [min] | Type | Width [min] | Area mAU *s | Height [mAU] | Area %  |
|--------|---------------|------|-------------|-------------|--------------|---------|
| 1      | 14.052        | BV   | 0.3627      | 1.17563e4   | 498.10931    | 49.4351 |
| 2      | 15.103        | VB   | 0.3926      | 1.20249e4   | 468.49344    | 50.5649 |

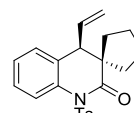

**3an**

| Peak # | RetTime [min] | Type | Width [min] | Area mAU *s | Height [mAU] | Area %   |
|--------|---------------|------|-------------|-------------|--------------|----------|
| 1      | 15.054        | BB   | 0.3923      | 1.95728e4   | 763.30823    | 100.0000 |

**Supplementary Figure 74. HPLC spectra for compound 3an**

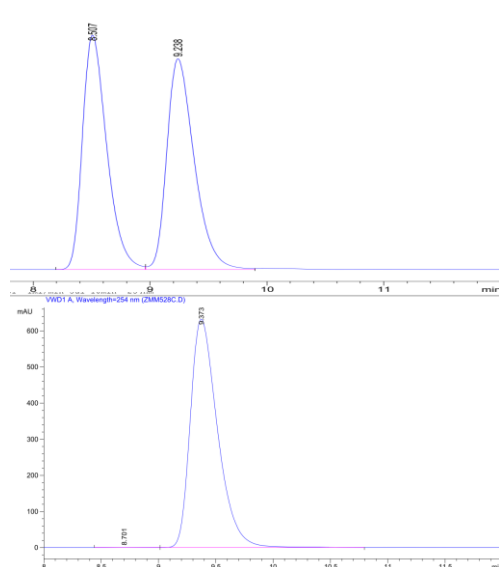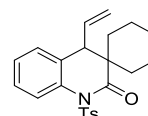

**rac-3ao**

| Peak # | RetTime [min] | Type | Width [min] | Area mAU *s | Height [mAU] | Area %  |
|--------|---------------|------|-------------|-------------|--------------|---------|
| 1      | 8.507         | BV   | 0.2247      | 9222.37891  | 635.17957    | 49.6429 |
| 2      | 9.238         | VV   | 0.2523      | 9355.06738  | 571.00031    | 50.3571 |

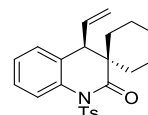

**3ao**

| Peak # | RetTime [min] | Type | Width [min] | Area mAU *s | Height [mAU] | Area %  |
|--------|---------------|------|-------------|-------------|--------------|---------|
| 1      | 8.701         | BV   | 0.2495      | 12.61167    | 7.14838e-1   | 0.1207  |
| 2      | 9.373         | VB   | 0.2536      | 1.04330e4   | 632.34930    | 99.8793 |

**Supplementary Figure 75. HPLC spectra for compound 3ao**



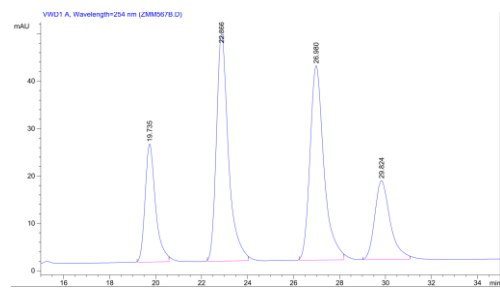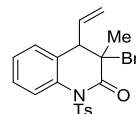

**rac-3ap**

| Peak # | RetTime [min] | Type | Width [min] | Area mAU *s | Height [mAU] | Area %  |
|--------|---------------|------|-------------|-------------|--------------|---------|
| 1      | 19.735        | BB   | 0.4786      | 786.55231   | 24.94046     | 15.6401 |
| 2      | 22.866        | BB   | 0.5443      | 1735.25818  | 47.97415     | 34.5046 |
| 3      | 26.980        | BB   | 0.6371      | 1728.73071  | 41.03865     | 34.3748 |
| 4      | 29.824        | BB   | 0.7077      | 778.52856   | 16.67560     | 15.4806 |

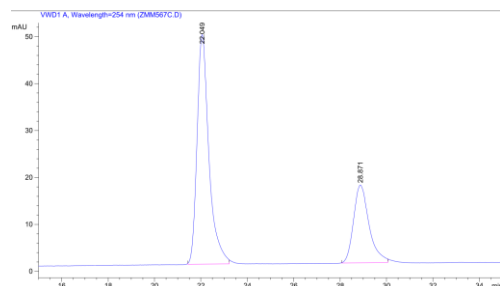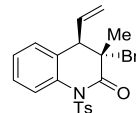

**3ap**

| Peak # | RetTime [min] | Type | Width [min] | Area mAU *s | Height [mAU] | Area %  |
|--------|---------------|------|-------------|-------------|--------------|---------|
| 1      | 22.049        | BB   | 0.5357      | 1733.95032  | 48.93972     | 69.2079 |
| 2      | 28.871        | BB   | 0.7050      | 771.47186   | 16.60938     | 30.7921 |

**Supplementary Figure 76. HPLC spectra for compound 3ap**

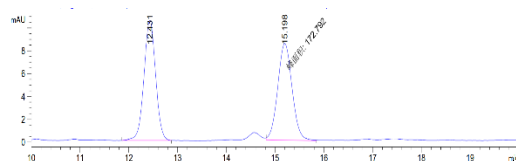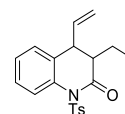

**rac-3ar**

| Peak # | RetTime [min] | Type | Width [min] | Area mAU *s | Height [mAU] | Area %  |
|--------|---------------|------|-------------|-------------|--------------|---------|
| 1      | 12.431        | BB   | 0.2585      | 175.11368   | 10.50439     | 50.3337 |
| 2      | 15.198        | MM   | 0.3405      | 172.79182   | 8.45742      | 49.6663 |

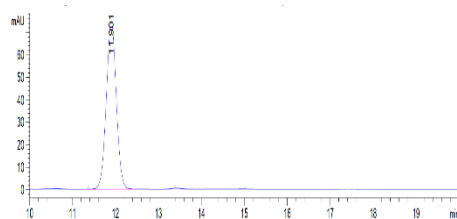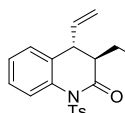

**3ar**

| Peak # | RetTime [min] | Type | Width [min] | Area mAU *s | Height [mAU] | Area %   |
|--------|---------------|------|-------------|-------------|--------------|----------|
| 1      | 11.901        | BB   | 0.2506      | 1204.91125  | 74.52222     | 100.0000 |

**Supplementary Figure 77. HPLC spectra for compound 3ar**

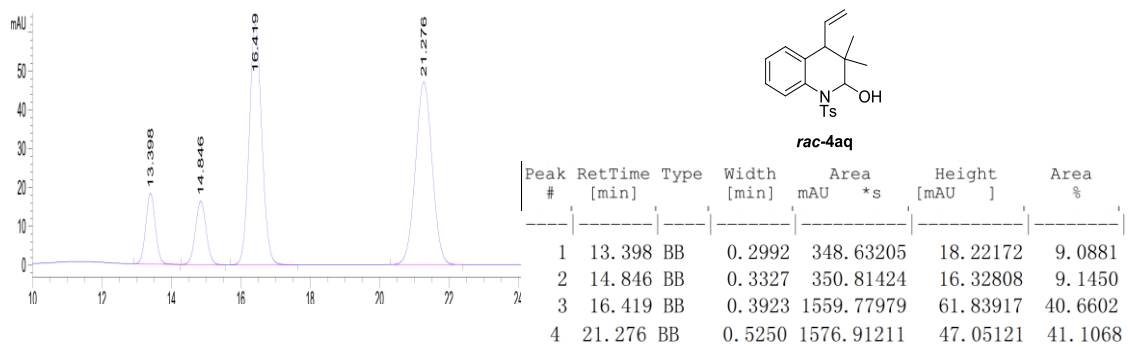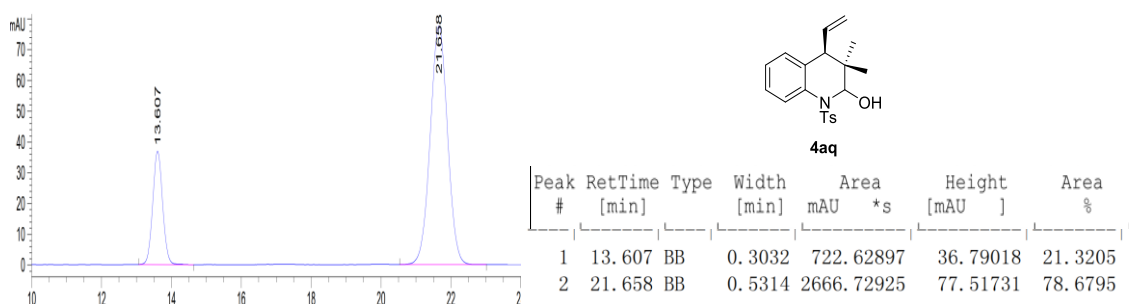

Supplementary Figure 78. HPLC spectra for compound 4aq

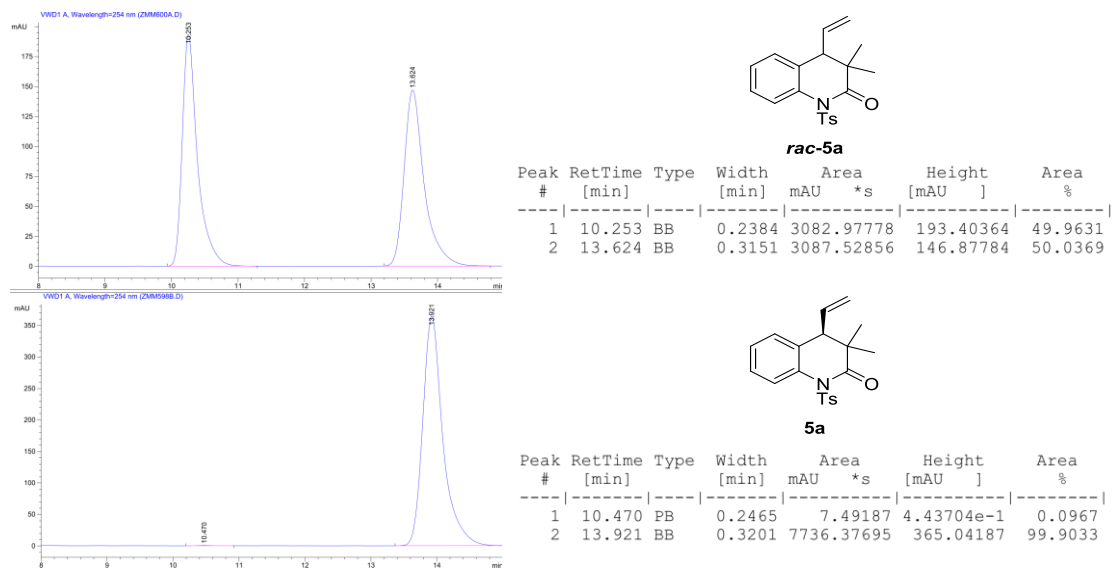

Supplementary Figure 79. HPLC spectra for compound 5a

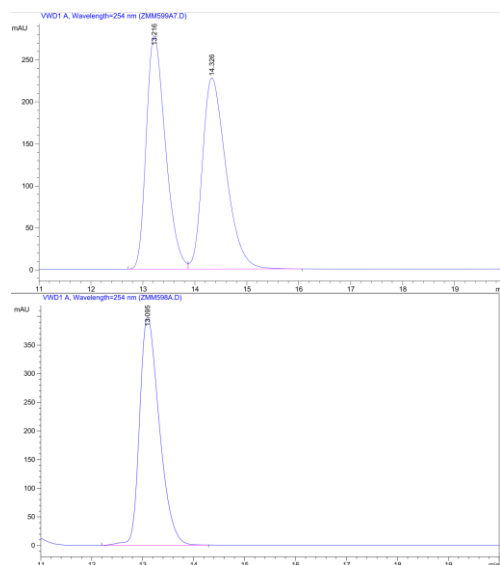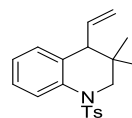

**rac-5b**

| Peak # | RetTime [min] | Type | Width [min] | Area mAU *s | Height [mAU] | Area %  |
|--------|---------------|------|-------------|-------------|--------------|---------|
| 1      | 13.215        | BV   | 0.3954      | 7129.92432  | 277.92987    | 49.8219 |
| 2      | 14.326        | VB   | 0.4845      | 7180.90479  | 227.64189    | 50.1781 |

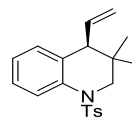

**5b**

| Peak # | RetTime [min] | Type | Width [min] | Area mAU *s | Height [mAU] | Area %   |
|--------|---------------|------|-------------|-------------|--------------|----------|
| 1      | 13.095        | BB   | 0.4132      | 1.07336e4   | 398.51672    | 100.0000 |

**Supplementary Figure 80. HPLC spectra for compound 5b**

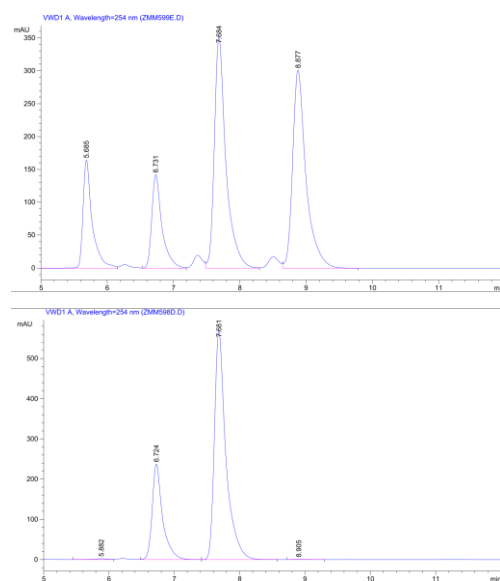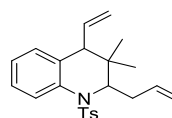

**rac-5c**

| Peak # | RetTime [min] | Type | Width [min] | Area mAU *s | Height [mAU] | Area %  |
|--------|---------------|------|-------------|-------------|--------------|---------|
| 1      | 5.685         | VV   | 0.1400      | 1606.25146  | 164.66388    | 13.7887 |
| 2      | 6.731         | VV   | 0.1569      | 1522.48975  | 142.25235    | 13.0696 |
| 3      | 7.684         | VV   | 0.1801      | 4280.40283  | 351.13730    | 36.7446 |
| 4      | 8.877         | VB   | 0.2078      | 4239.92383  | 301.47614    | 36.3971 |

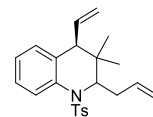

**5c**

| Peak # | RetTime [min] | Type | Width [min] | Area mAU *s | Height [mAU] | Area %  |
|--------|---------------|------|-------------|-------------|--------------|---------|
| 1      | 5.882         | BV   | 0.2276      | 40.01675    | 2.38781      | 0.4162  |
| 2      | 6.724         | VV   | 0.1605      | 2616.56714  | 237.53053    | 27.2147 |
| 3      | 7.681         | VB   | 0.1807      | 6941.95898  | 566.93958    | 72.2027 |
| 4      | 8.905         | BB   | 0.2478      | 16.00248    | 9.41506e-1   | 0.1664  |

**Supplementary Figure 81. HPLC spectra for compound 5c**

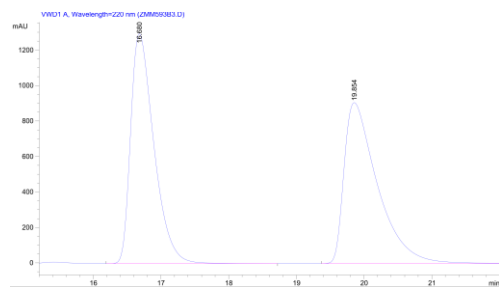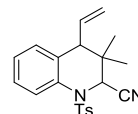

**rac-5d**

| Peak # | RetTime [min] | Type | Width [min] | Area mAU  | Area *s | Height [mAU] | Area %  |
|--------|---------------|------|-------------|-----------|---------|--------------|---------|
| 1      | 16.680        | VB   | 0.3666      | 3.09860e4 |         | 1294.52051   | 49.8183 |
| 2      | 19.854        | BB   | 0.5118      | 3.12121e4 |         | 907.65759    | 50.1817 |

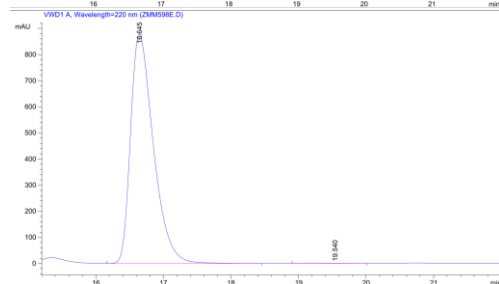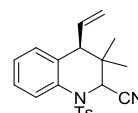

**5d**

| Peak # | RetTime [min] | Type | Width [min] | Area mAU  | Area *s | Height [mAU] | Area %  |
|--------|---------------|------|-------------|-----------|---------|--------------|---------|
| 1      | 16.645        | VB   | 0.3617      | 2.06365e4 |         | 877.47894    | 99.7497 |
| 2      | 19.540        | BV   | 0.5910      | 51.79107  |         | 1.17263      | 0.2503  |

**Supplementary Figure 82. HPLC spectra for compound 5d**

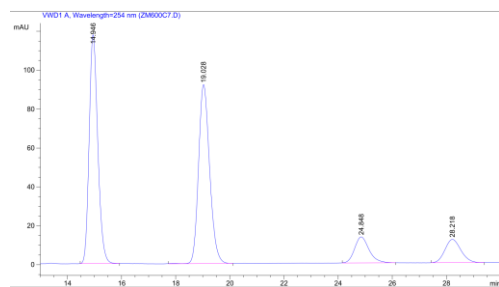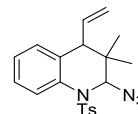

**rac-5e**

| Peak # | RetTime [min] | Type | Width [min] | Area mAU   | Area *s | Height [mAU] | Area %  |
|--------|---------------|------|-------------|------------|---------|--------------|---------|
| 1      | 14.946        | BB   | 0.3393      | 2601.82959 |         | 117.75124    | 41.8920 |
| 2      | 19.028        | BP   | 0.4387      | 2610.95508 |         | 92.03516     | 42.0390 |
| 3      | 24.848        | BB   | 0.5703      | 501.27478  |         | 13.40358     | 8.0710  |
| 4      | 28.218        | BB   | 0.6384      | 496.73978  |         | 12.04428     | 7.9980  |

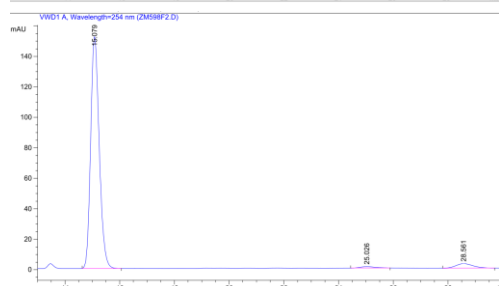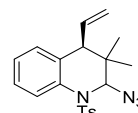

**5e**

| Peak # | RetTime [min] | Type | Width [min] | Area mAU   | Area *s | Height [mAU] | Area %  |
|--------|---------------|------|-------------|------------|---------|--------------|---------|
| 1      | 15.079        | BB   | 0.3350      | 3302.98511 |         | 152.01910    | 95.1703 |
| 2      | 25.026        | BB   | 0.5411      | 40.42824   |         | 1.00726      | 1.1649  |
| 3      | 28.561        | BP   | 0.6230      | 127.19212  |         | 2.92974      | 3.6648  |

**Supplementary Figure 83. HPLC spectra for compound 5e**

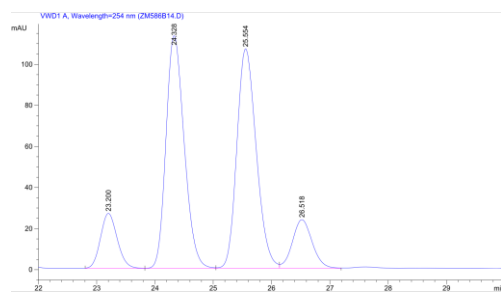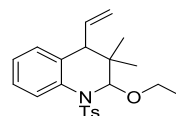

**rac-5f**

| Peak # | RetTime [min] | Type | Width [min] | Area mAU *s | Height [mAU] | Area %  |
|--------|---------------|------|-------------|-------------|--------------|---------|
| 1      | 23.200        | BV   | 0.3118      | 536.37640   | 26.83874     | 8.8993  |
| 2      | 24.328        | VV   | 0.3408      | 2459.36182  | 113.22040    | 40.8047 |
| 3      | 25.554        | VV   | 0.3572      | 2471.79688  | 106.86559    | 41.0110 |
| 4      | 26.518        | VV   | 0.3626      | 559.62347   | 23.71740     | 9.2850  |

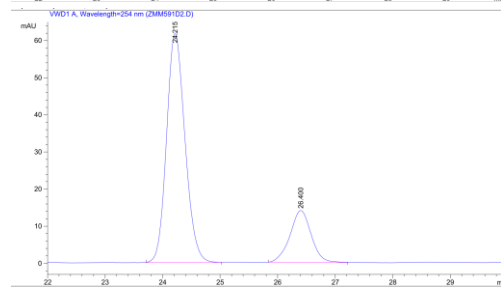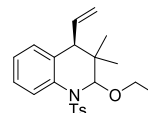

**5f**

| Peak # | RetTime [min] | Type | Width [min] | Area mAU *s | Height [mAU] | Area %  |
|--------|---------------|------|-------------|-------------|--------------|---------|
| 1      | 24.215        | BB   | 0.3470      | 1372.85242  | 61.68467     | 79.2318 |
| 2      | 26.400        | BB   | 0.3936      | 359.85178   | 13.97311     | 20.7682 |

**Supplementary Figure 84. HPLC spectra for compound 5f**

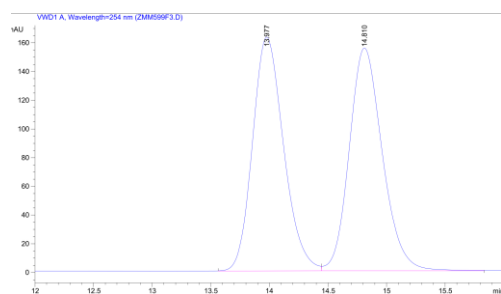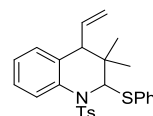

**rac-5g**

| Peak # | RetTime [min] | Type | Width [min] | Area mAU *s | Height [mAU] | Area %  |
|--------|---------------|------|-------------|-------------|--------------|---------|
| 1      | 13.977        | BV   | 0.2850      | 3003.45996  | 162.85712    | 49.5913 |
| 2      | 14.810        | VB   | 0.3052      | 3052.96704  | 155.23151    | 50.4087 |

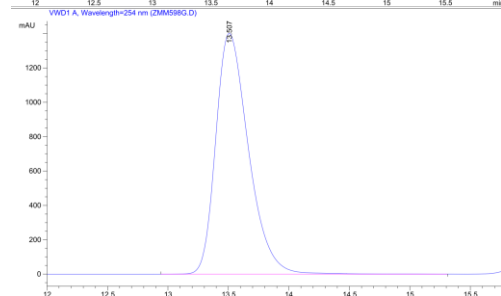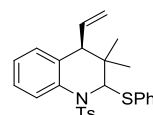

**5g**

| Peak # | RetTime [min] | Type | Width [min] | Area mAU *s | Height [mAU] | Area %   |
|--------|---------------|------|-------------|-------------|--------------|----------|
| 1      | 13.507        | BB   | 0.2897      | 2.64038e4   | 1401.69983   | 100.0000 |

**Supplementary Figure 85. HPLC spectra for compound 5g**

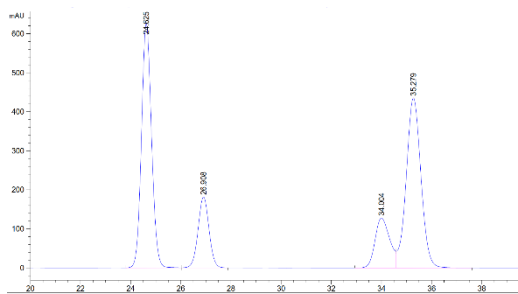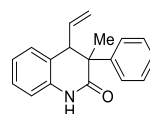

**rac-8aa**

| Peak # | RetTime [min] | Type | Width [min] | Area mAU *s | Height [mAU] | Area %  |
|--------|---------------|------|-------------|-------------|--------------|---------|
| 1      | 24.625        | BB   | 0.4298      | 1.73530e4   | 625.15576    | 37.9236 |
| 2      | 26.908        | BB   | 0.4668      | 5477.89014  | 181.15808    | 11.9715 |
| 3      | 34.004        | BV   | 0.6189      | 5181.75098  | 127.84082    | 11.3243 |
| 4      | 35.279        | VB   | 0.6279      | 1.77452e4   | 435.05685    | 38.7806 |

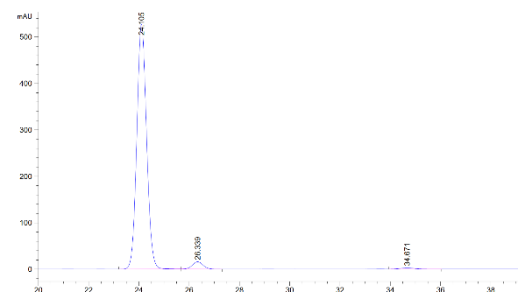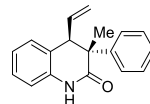

**8aa**

| Peak # | RetTime [min] | Type | Width [min] | Area mAU *s | Height [mAU] | Area %  |
|--------|---------------|------|-------------|-------------|--------------|---------|
| 1      | 24.105        | BB   | 0.4193      | 1.42373e4   | 526.86731    | 96.2075 |
| 2      | 26.339        | BB   | 0.4456      | 459.74808   | 15.61179     | 3.1067  |
| 3      | 34.671        | BB   | 0.5015      | 101.48010   | 2.47928      | 0.6857  |

**Supplementary Figure 86.** HPLC spectra for compound **8aa**

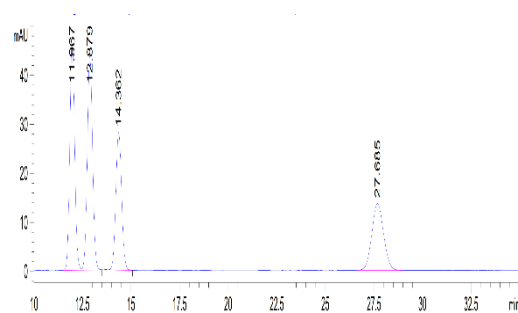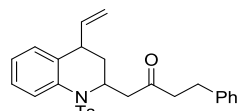

**rac-7a**

| Peak # | RetTime [min] | Type | Width [min] | Area mAU  | Area *s | Height [mAU] | Area %  |
|--------|---------------|------|-------------|-----------|---------|--------------|---------|
| 1      | 11.967        | BV   | 0.2699      | 831.89996 |         | 47.58797     | 29.4992 |
| 2      | 12.879        | VB   | 0.2955      | 828.43164 |         | 43.64028     | 29.3762 |
| 3      | 14.362        | BB   | 0.3229      | 584.14746 |         | 28.06067     | 20.7139 |
| 4      | 27.685        | BB   | 0.6373      | 575.60205 |         | 13.61421     | 20.4108 |

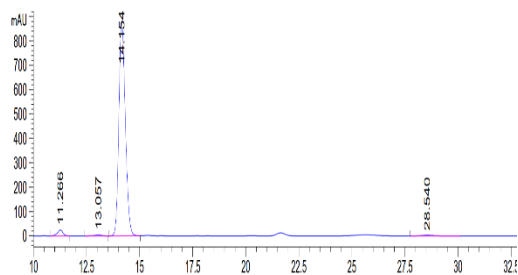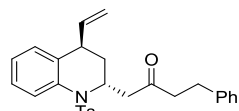

**(R,R)-7a**

| Peak # | RetTime [min] | Type | Width [min] | Area mAU  | Area *s | Height [mAU] | Area %  |
|--------|---------------|------|-------------|-----------|---------|--------------|---------|
| 1      | 11.266        | BB   | 0.2582      | 428.97964 |         | 24.75271     | 2.2224  |
| 2      | 13.057        | BB   | 0.3206      | 91.89863  |         | 4.11345      | 0.4761  |
| 3      | 14.154        | BB   | 0.3268      | 1.86606e4 |         | 881.98322    | 96.6726 |
| 4      | 28.540        | BB   | 0.5033      | 121.39806 |         | 2.90617      | 0.6289  |

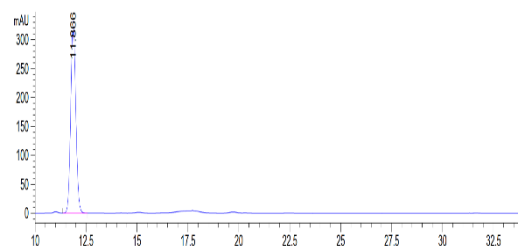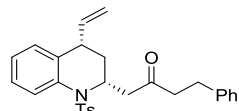

**(R,S)-7a**

| Peak # | RetTime [min] | Type | Width [min] | Area mAU   | Area *s | Height [mAU] | Area %   |
|--------|---------------|------|-------------|------------|---------|--------------|----------|
| 1      | 11.866        | BB   | 0.2699      | 5794.46191 |         | 331.54282    | 100.0000 |

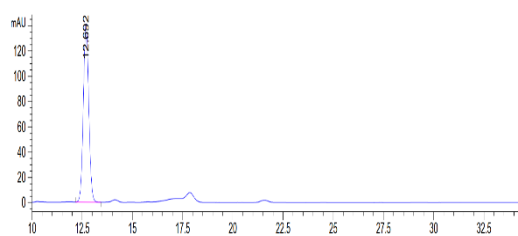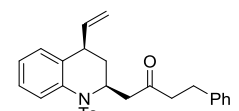

**(S,R)-7a**

| Peak # | RetTime [min] | Type | Width [min] | Area mAU   | Area *s | Height [mAU] | Area %   |
|--------|---------------|------|-------------|------------|---------|--------------|----------|
| 1      | 12.692        | BB   | 0.2920      | 2659.98413 |         | 141.03714    | 100.0000 |

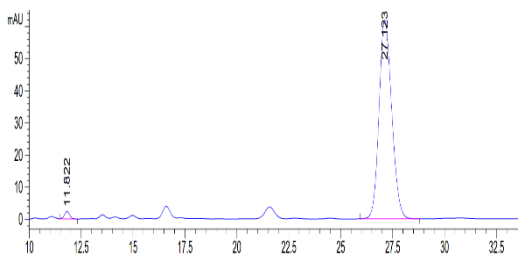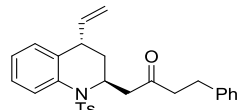

**(S,S)-7a**

| Peak # | RetTime [min] | Type | Width [min] | Area mAU   | Area *s | Height [mAU] | Area %  |
|--------|---------------|------|-------------|------------|---------|--------------|---------|
| 1      | 11.822        | BB   | 0.2591      | 38.63869   |         | 2.26405      | 1.4484  |
| 2      | 27.123        | BB   | 0.6502      | 2629.06348 |         | 61.81440     | 98.5516 |

**Supplementary Figure 87. HPLC spectra for compound 7a**

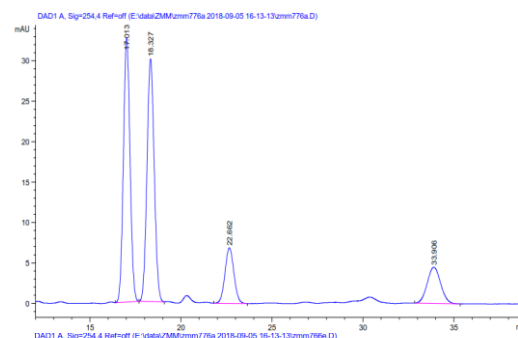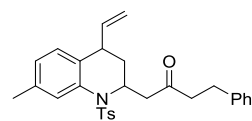

**rac-7b**

| Peak # | RetTime [min] | Type | Width [min] | Area mAU *s | Height [mAU] | Area %  |
|--------|---------------|------|-------------|-------------|--------------|---------|
| 1      | 17.013        | BB   | 0.3950      | 825.88342   | 32.65815     | 38.9832 |
| 2      | 18.327        | BB   | 0.4305      | 829.32721   | 30.00300     | 39.1458 |
| 3      | 22.662        | BB   | 0.5123      | 233.55504   | 6.87587      | 11.0242 |
| 4      | 33.906        | BB   | 0.7166      | 229.79640   | 4.47835      | 10.8468 |

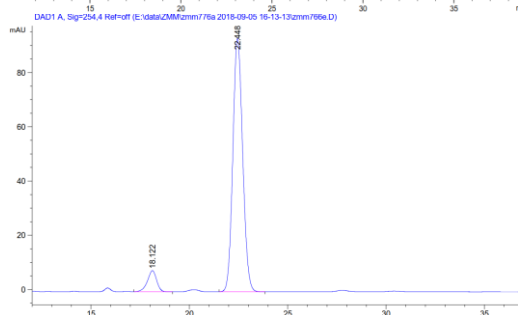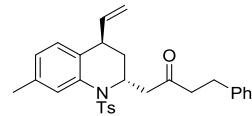

**(R,R)-7b**

| Peak # | RetTime [min] | Type | Width [min] | Area mAU *s | Height [mAU] | Area %  |
|--------|---------------|------|-------------|-------------|--------------|---------|
| 1      | 18.122        | BB   | 0.4813      | 253.00102   | 7.78280      | 7.2283  |
| 2      | 22.448        | BB   | 0.5414      | 3247.14404  | 93.44183     | 92.7717 |

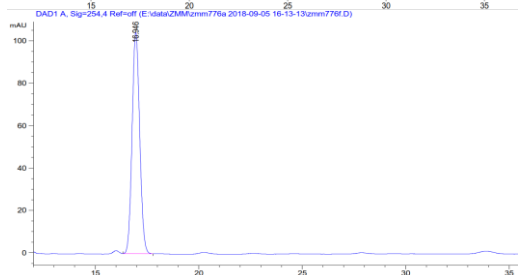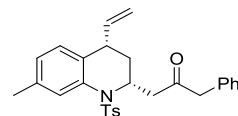

**(R,S)-7b**

| Peak # | RetTime [min] | Type | Width [min] | Area mAU *s | Height [mAU] | Area %   |
|--------|---------------|------|-------------|-------------|--------------|----------|
| 1      | 16.946        | BB   | 0.3982      | 2665.19897  | 104.28143    | 100.0000 |

**Supplementary Figure 88. HPLC spectra for compound 7b**



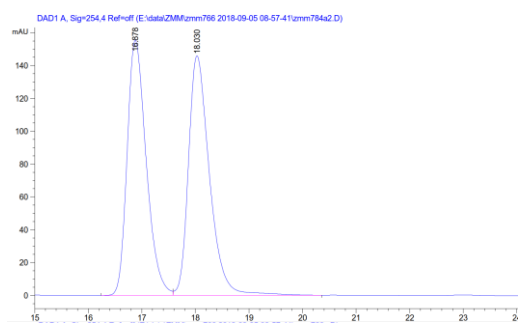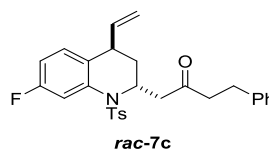

| Peak # | RetTime [min] | Type | Width [min] | Area mAU *s | Height [mAU] | Area %  |
|--------|---------------|------|-------------|-------------|--------------|---------|
| 1      | 16.878        | BV   | 0.3810      | 3851.10913  | 155.46748    | 49.2178 |
| 2      | 18.030        | VB   | 0.4139      | 3973.52075  | 145.83990    | 50.7822 |

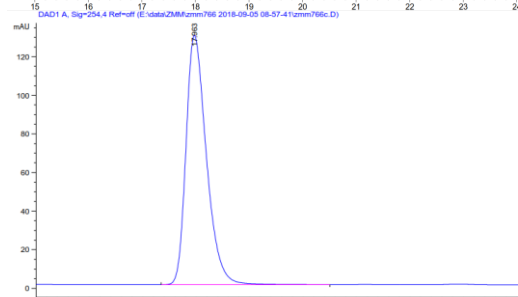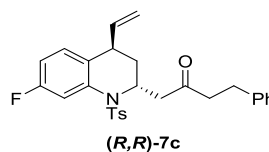

| Peak # | RetTime [min] | Type | Width [min] | Area mAU *s | Height [mAU] | Area %   |
|--------|---------------|------|-------------|-------------|--------------|----------|
| 1      | 17.963        | BB   | 0.4054      | 3425.39380  | 129.15962    | 100.0000 |

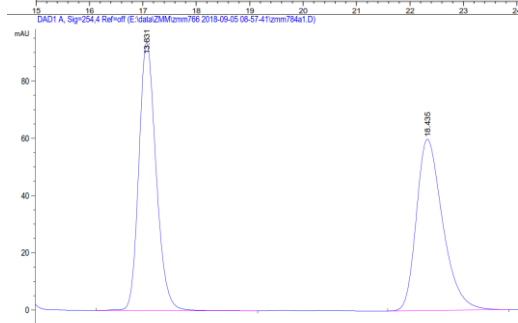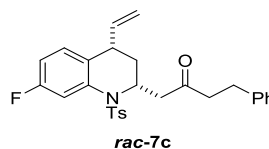

| Peak # | RetTime [min] | Type | Width [min] | Area mAU *s | Height [mAU] | Area %  |
|--------|---------------|------|-------------|-------------|--------------|---------|
| 1      | 13.831        | BB   | 0.3013      | 1842.63892  | 93.73814     | 50.6959 |
| 2      | 18.435        | BB   | 0.4573      | 1792.04944  | 59.85801     | 49.3041 |

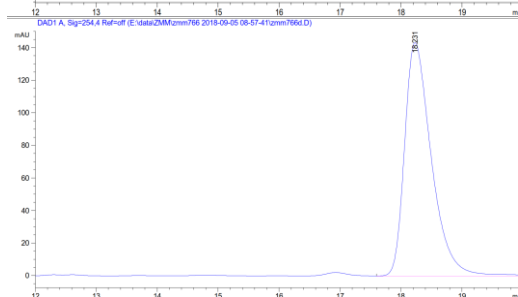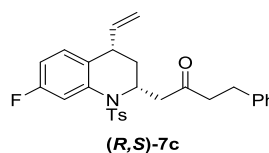

| Peak # | RetTime [min] | Type | Width [min] | Area mAU *s | Height [mAU] | Area %   |
|--------|---------------|------|-------------|-------------|--------------|----------|
| 1      | 18.231        | BB   | 0.4653      | 4387.04004  | 143.24936    | 100.0000 |

Supplementary Figure 89. HPLC spectra for compound 7c

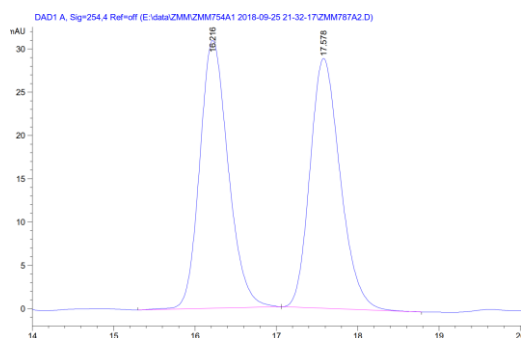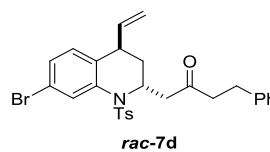

| Peak # | RetTime [min] | Type | Width [min] | Area mAU  | Area *s | Height [mAU] | Area %  |
|--------|---------------|------|-------------|-----------|---------|--------------|---------|
| 1      | 16.216        | BB   | 0.3721      | 753.71283 |         | 30.95550     | 50.2978 |
| 2      | 17.578        | BB   | 0.3970      | 744.78845 |         | 28.86328     | 49.7022 |

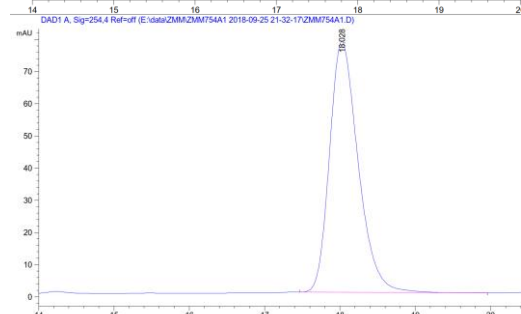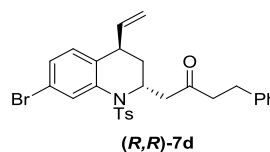

| Peak # | RetTime [min] | Type | Width [min] | Area mAU   | Area *s | Height [mAU] | Area %   |
|--------|---------------|------|-------------|------------|---------|--------------|----------|
| 1      | 18.028        | BB   | 0.4057      | 2056.46777 |         | 77.97136     | 100.0000 |

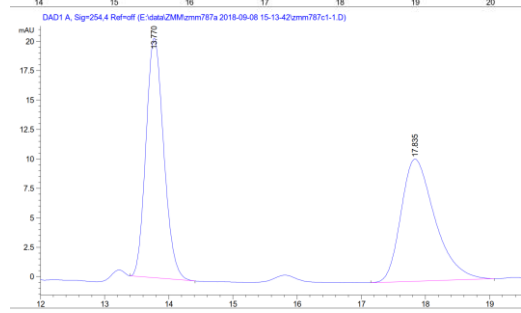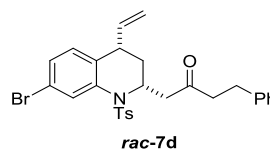

| Peak # | RetTime [min] | Type | Width [min] | Area mAU  | Area *s | Height [mAU] | Area %  |
|--------|---------------|------|-------------|-----------|---------|--------------|---------|
| 1      | 13.770        | BB   | 0.2994      | 393.40182 |         | 20.35808     | 50.8114 |
| 2      | 17.835        | BB   | 0.5560      | 380.83817 |         | 10.38135     | 49.1886 |

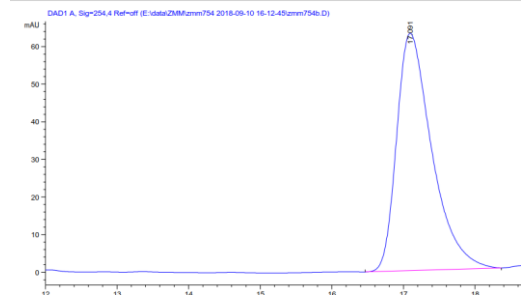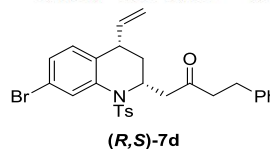

| Peak # | RetTime [min] | Type | Width [min] | Area mAU   | Area *s | Height [mAU] | Area %   |
|--------|---------------|------|-------------|------------|---------|--------------|----------|
| 1      | 17.091        | BB   | 0.5138      | 2152.51563 |         | 63.12106     | 100.0000 |

Supplementary Figure 90. HPLC spectra for compound 7d

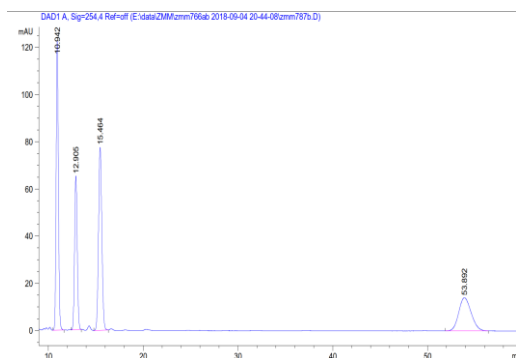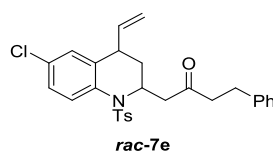

| Peak # | RetTime [min] | Type | Width [min] | Area mAU *s | Height [mAU] | Area %  |
|--------|---------------|------|-------------|-------------|--------------|---------|
| 1      | 10.942        | BB   | 0.2571      | 2025.96509  | 122.40081    | 31.3644 |
| 2      | 12.905        | BB   | 0.3037      | 1269.66418  | 65.05460     | 19.6559 |
| 3      | 15.464        | BB   | 0.3775      | 1883.42310  | 77.50758     | 29.1576 |
| 4      | 53.892        | BB   | 1.2968      | 1280.39685  | 14.05521     | 19.8221 |

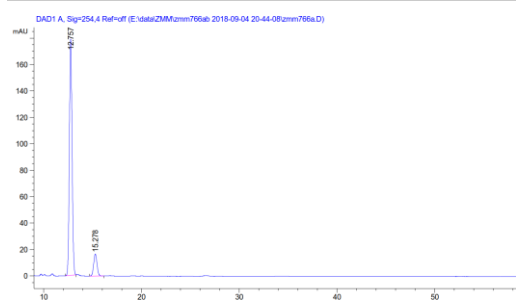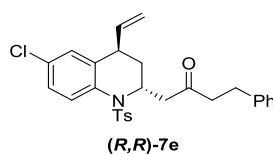

| Peak # | RetTime [min] | Type | Width [min] | Area mAU *s | Height [mAU] | Area %  |
|--------|---------------|------|-------------|-------------|--------------|---------|
| 1      | 12.757        | BB   | 0.2982      | 3435.60303  | 178.75697    | 89.6637 |
| 2      | 15.278        | BB   | 0.3719      | 396.05270   | 16.62525     | 10.3363 |

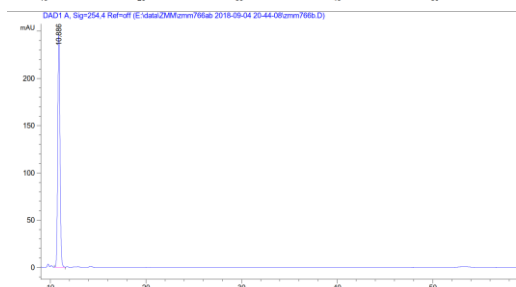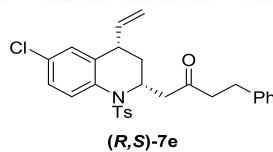

| Peak # | RetTime [min] | Type | Width [min] | Area mAU *s | Height [mAU] | Area %   |
|--------|---------------|------|-------------|-------------|--------------|----------|
| 1      | 10.886        | BB   | 0.2554      | 4027.69019  | 245.46875    | 100.0000 |

**Supplementary Figure 91. HPLC spectra for compound 7e**

**Supplementary Table 1.** The effect of acids for the cycloaddition of aldehyde **2a**<sup>a</sup>

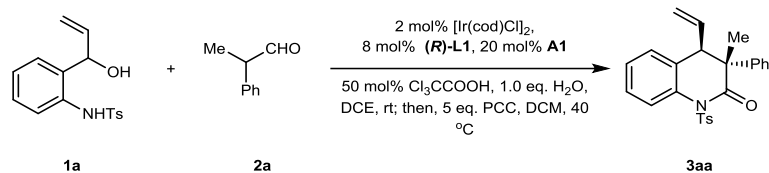

| Entry | Acid                                           | Yield(%) <sup>b</sup> | Dr <sup>c</sup> | Ee(%) <sup>c</sup> |
|-------|------------------------------------------------|-----------------------|-----------------|--------------------|
| 1     | CCl <sub>3</sub> CO <sub>2</sub> H             | 64                    | >19:1           | 99                 |
| 2     | CF <sub>3</sub> CO <sub>2</sub> H              | 63                    | >19:1           | 82                 |
| 3     | TsOH·H <sub>2</sub> O                          | trace                 | -               | -                  |
| 4     | (PhO) <sub>2</sub> PO <sub>2</sub> H           | 58                    | >19:1           | 98                 |
| 5     | PhCO <sub>2</sub> H                            | N.R.                  | -               | N.R.               |
| 6     | <i>p</i> -NO <sub>2</sub> -PhCO <sub>2</sub> H | N.R.                  | -               | -                  |
| 7     | CH <sub>3</sub> CO <sub>2</sub> H              | trace                 | -               | -                  |

<sup>a</sup>Standard conditions: **1a** (0.25 mmol), **2a** (0.5 mmol), [Ir(cod)Cl]<sub>2</sub> (2 mol%), chiral ligand (**R**)-**L1** (8 mol%), amine **A1** (20 mol%), acid (50 mol%) and H<sub>2</sub>O (1.0 eq). in 1,2-dichloroethane (0.5 mL) for 48 h at room temperature; then, PCC (5.0 eq), silica gel (100 mg) and CH<sub>2</sub>Cl<sub>2</sub> (5mL) were added and the mixture was stirred at 40 °C for 10 h. <sup>b</sup>Isolated yield. <sup>c</sup>Determined by chiral HPLC analysis.

**Supplementary Table 2.** The effect of amine catalysts for the cycloaddition of aldehyde **2a**<sup>a</sup>

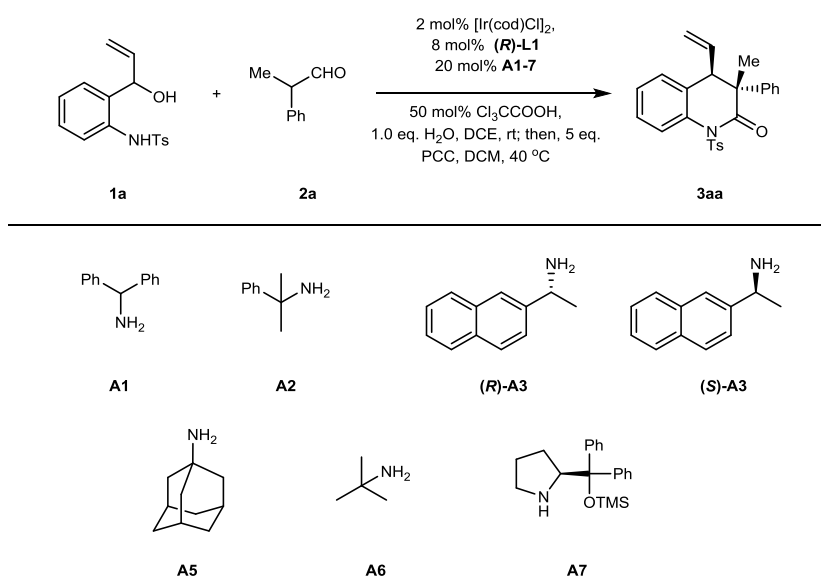

| Entry          | Amine         | Yield(%) <sup>b</sup> | Dr <sup>c</sup> | Ee(%) <sup>c</sup> |
|----------------|---------------|-----------------------|-----------------|--------------------|
| 1              | <b>A1</b>     | 64                    | >19:1           | 99                 |
| 2              | <b>A2</b>     | 22                    | >19:1           | 95                 |
| 3              | <b>(R)-A3</b> | 62                    | >19:1           | 93                 |
| 4              | <b>(S)-A3</b> | 26                    | >19:1           | 94                 |
| 5 <sup>d</sup> | <b>(R)-A3</b> | 28                    | >19:1           | -95                |
| 6 <sup>d</sup> | <b>(S)-A3</b> | 61                    | >19:1           | -94                |
| 7              | <b>A5</b>     | 27                    | >19:1           | 99                 |
| 8              | <b>A6</b>     | 22                    | >19:1           | 98                 |
| 9              | <b>A7</b>     | trace                 | -               | -                  |

<sup>a</sup>Standard conditions: **1a** (0.25 mmol), **2a** (0.5 mmol), [Ir(cod)Cl]<sub>2</sub> (2 mol%), chiral ligand (8 mol%), amine (20 mol%), trichloroacetic acid (50 mol%) and H<sub>2</sub>O (1.0 eq.) in 1,2-dichloroethane (0.5 mL) for 48 h at room temperature; then, PCC (5.0 eq), silica gel (100 mg) and CH<sub>2</sub>Cl<sub>2</sub> (5 mL) were added and the mixture was stirred at 40 °C for 10 h. <sup>b</sup>Isolated yield. <sup>c</sup>Determined by chiral HPLC analysis. <sup>d</sup>(**S**)-**L1** was used instead of (**R**)-**L1**.

**Supplementary Table 3.** The effect of amine catalysts and ligands for the cycloaddition of ketone **6a**<sup>a</sup>

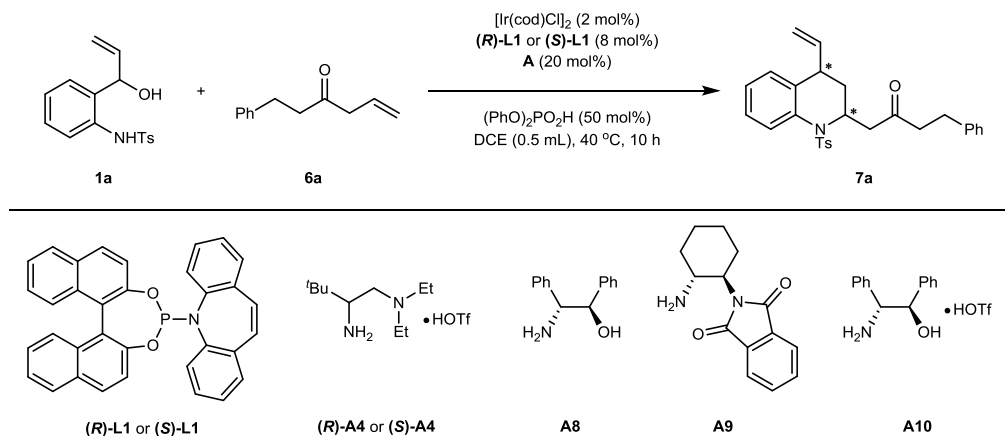

| Entry           | Ligand        | Amine         | Yield(%) <sup>b</sup> | Dr <sup>c</sup> | Ee(%) <sup>c</sup> |
|-----------------|---------------|---------------|-----------------------|-----------------|--------------------|
| 1               | <b>(R)-L1</b> | <b>(S)-A4</b> | 29                    | >20:1           | >99                |
| 2               | <b>(S)-L1</b> | <b>(S)-A4</b> | 34                    | >1:20           | >99                |
| 3               | <b>(R)-L1</b> | <b>A8</b>     | 64                    | 1.7:1           | 99                 |
| 4               | <b>(S)-L1</b> | <b>A8</b>     | 41                    | 4.6:1           | >99                |
| 5               | <b>(R)-L1</b> | <b>A9</b>     | N.R.                  | -               | -                  |
| 6               | <b>(S)-L1</b> | <b>A9</b>     | N.R.                  | -               | -                  |
| 7               | <b>(R)-L1</b> | <b>A10</b>    | 43                    | 4:1             | >99                |
| 8               | <b>(S)-L1</b> | <b>A10</b>    | 45                    | 3:1             | >99                |
| 9 <sup>d</sup>  | <b>(R)-L1</b> | <b>(S)-A4</b> | 84                    | >20:1           | >99                |
| 10 <sup>d</sup> | <b>(S)-L1</b> | <b>(S)-A4</b> | 81                    | >1:20           | >99                |
| 11 <sup>d</sup> | <b>(R)-L1</b> | <b>(R)-A4</b> | 80                    | >1:20           | >99                |
| 12 <sup>d</sup> | <b>(S)-L1</b> | <b>(R)A4</b>  | 86                    | >20:1           | >99                |

<sup>a</sup>Standard conditions: **1a** (0.25 mmol), **6a** (0.5 mmol),  $[\text{Ir}(\text{cod})\text{Cl}]_2$  (2 mol%), L (8 mol%), amine **A** (20 mol%),  $(\text{PhO})_2\text{PO}_2\text{H}$  (0.5 eq.) in 1,2-dichloroethane (0.5 mL) for 10 h at 40 °C. <sup>b</sup>Isolated yield. <sup>c</sup>Determined by chiral HPLC analysis. <sup>d</sup>Without  $(\text{PhO})_2\text{PO}_2\text{H}$ , **6a** (1.25 mmol), DCE (0.3 mL) at 50 °C for 48 h.

## Supplementary Methods

### General analytical information

$^1\text{H}$  NMR spectra were recorded on 400 or 600 MHz spectrophotometers. Chemical shifts ( $\delta$ ) are reported in ppm from the resonance of tetramethyl silane as the internal standard (TMS: 0.00 ppm). Data are reported as follows: chemical shift, multiplicity (s = singlet, d = doublet, t = triplet, q = quartet, m = multiplet), coupling constants (Hz) and integration. All NMR spectra were recorded on a Bruker spectrometer at 400 MHz ( $^1\text{H}$  NMR), 100 MHz ( $^{13}\text{C}$  NMR), 376 MHz ( $^{19}\text{F}$  NMR). HRMS was recorded on Waters GCT Premier ESI-TOF. Enantiomeric ratio (ee) values were determined by chiral HPLC with chiral OD-H, AD-H, AZ-H, IC-H, IE-H, OX-H, OJ-H, IF-H columns with hexane and *i*-PrOH as solvents. Optical rotations were measured with a polarimeter. All air- and moisture-sensitive reactions were performed under an atmosphere of Ar in fire dried glassware. The manipulations for iridium-catalyzed reactions were carried out with standard Schlenk techniques under argon. Flash column chromatography was performed using 200-300 mesh silica gel.

### Preparation of Substrates and Ligands

Substrates **1** were prepared through one step from known chemicals<sup>1</sup> as shown below:

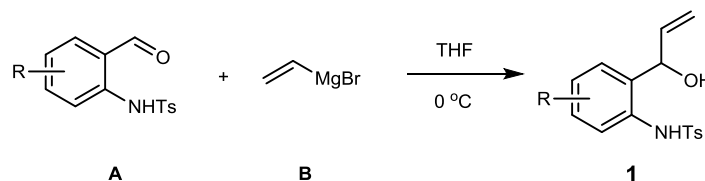

**Supplementary procedure A:** Vinylmagnesium bromide **B** (1.0 M THF solution, 12.5 mmol) was slowly added to the solution of aldehyde **A** (5 mmol) in dry THF (15 mL) at 0 °C under a nitrogen atmosphere. Then, the mixture was stirred at 0 °C for 30 minutes (monitored by TLC) and quenched with saturated *aq.*  $\text{NaHCO}_3$  (20 mL). The aqueous layer was extracted with EtOAc and the organic phase was dried over  $\text{Na}_2\text{SO}_4$ , filtered and concentrated *in vacuo*. The crude residue was purified by column chromatography on silica gel to give the title compound **1**.

### *N*-(2-(1-Hydroxyallyl)phenyl)-4-methylbenzenesulfonamide(**1a**)

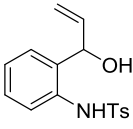

White solid, 91% yield, M.P: 63-65 °C.  $^1\text{H}$  NMR (400 MHz,  $\text{CDCl}_3$ )  $\delta$  (ppm) 8.14 (s, 1H), 7.67 (d,  $J = 8.2$  Hz, 2H), 7.46 (d,  $J = 8.1$  Hz, 1H), 7.22 (d,  $J = 8.2$  Hz, 3H), 7.10 – 7.03 (m, 2H), 5.90 – 5.82 (m, 1H), 5.23 – 5.03 (m, 3H), 2.50 (s, 1H), 2.38 (s, 3H).  $^{13}\text{C}$  NMR (100 MHz,  $\text{CDCl}_3$ )  $\delta$  (ppm) 143.7, 137.6, 136.5, 135.6, 131.8, 129.5, 128.7, 128.2, 127.2, 124.6, 121.8, 116.1, 74.1, 21.4. HRMS (ESI):  $m/z$   $[\text{M} + \text{Na}]^+$  calcd for  $\text{C}_{16}\text{H}_{17}\text{NO}_3\text{S}$ : 326.0821; found: 326.0823.

### ***N*-(2-(1-Hydroxyallyl)-5-methylphenyl)-4-methylbenzenesulfonamide(1b)**

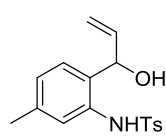

White solid, 72% yield, M.P: 105-107 °C. <sup>1</sup>H NMR (400 MHz, CDCl<sub>3</sub>) δ (ppm) 8.11 (s, 1H), 7.65 (d, *J* = 7.8 Hz, 2H), 7.27 (s, 1H), 7.21 (d, *J* = 7.9 Hz, 2H), 6.95 (d, *J* = 7.7 Hz, 1H), 6.84 (d, *J* = 7.8 Hz, 1H), 5.86-5.78 (m, 1H), 5.13 (dd, *J* = 27.7, 13.8 Hz, 2H), 5.02 (d, *J* = 5.4 Hz, 1H), 2.65 (s, 1H), 2.37 (s, 3H), 2.27 (s, 3H). <sup>13</sup>C NMR (100 MHz, CDCl<sub>3</sub>) δ (ppm) 143.7, 139.0, 137.9, 136.8, 135.7, 129.5, 128.9, 128.1, 127.3, 125.5, 122.7, 116.1, 74.0, 21.5, 21.2. HRMS (ESI): *m/z* [M + Na]<sup>+</sup> calcd for C<sub>17</sub>H<sub>19</sub>NO<sub>3</sub>S: 340.0978; found: 340.0977.

### ***N*-(5-Fluoro-2-(1-hydroxyallyl)phenyl)-4-methylbenzenesulfonamide(1c)**

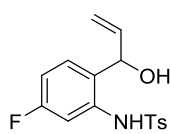

White solid, 89% yield, M.P: 78-79 °C. <sup>1</sup>H NMR (400 MHz, CDCl<sub>3</sub>) δ (ppm) 8.39 (s, 1H), 7.71 (d, *J* = 8.2 Hz, 2H), 7.30 – 7.24 (m, 3H), 7.02 (dd, *J* = 8.5, 6.2 Hz, 1H), 6.73 – 6.68 (m, 1H), 5.89-5.81 (m, 1H), 5.22 – 5.08 (m, 3H), 2.49 – 2.48 (m, 1H), 2.39 (s, 3H). <sup>13</sup>C NMR (100 MHz, CDCl<sub>3</sub>) δ (ppm) 162.6 (d, *J* = 246.5 Hz), 144.1, 137.6 (d, *J* = 10.8 Hz), 137.4, 136.4, 129.6, 129.6, 127.2, 126.3 (d, *J* = 3.3 Hz), 116.5, 110.7 (d, *J* = 21.5 Hz), 108.3 (d, *J* = 26.4 Hz). 74.2, 21.5. <sup>19</sup>F NMR (376 MHz, CDCl<sub>3</sub>) δ (ppm) -111.5. HRMS (ESI): *m/z* [M + Na]<sup>+</sup> calcd for C<sub>16</sub>H<sub>16</sub>NO<sub>3</sub>FS: 344.0727; found: 344.0723.

### ***N*-(2-(1-Hydroxyallyl)-5-(trifluoromethyl)phenyl)-4-methylbenzenesulfonamide(1d)**

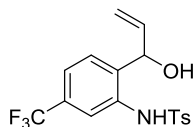

White solid, 65% yield, M.P: 66-68 °C. <sup>1</sup>H NMR (400 MHz, CDCl<sub>3</sub>) δ (ppm) 8.43 (s, 1H), 7.74 (s, 1H), 7.68 (d, *J* = 8.1 Hz, 2H), 7.28 – 7.23 (m, 3H), 7.19 (d, *J* = 8.0 Hz, 1H), 5.88-5.80 (m, 1H), 5.25 – 5.16 (m, 3H), 2.81 (d, *J* = 3.2 Hz, 1H), 2.38 (s, 3H). <sup>13</sup>C NMR (100 MHz, CDCl<sub>3</sub>) δ (ppm) 144.3, 136.8, 136.6, 136.1, 134.4, 129.7, 128.8, 127.3, 123.5 (q, *J* = 270.9 Hz), 120.9 (q, *J* = 120.9 Hz), 118.5, 118.0, 117.1, 74.4, 21.5. <sup>19</sup>F NMR (376 MHz, CDCl<sub>3</sub>) δ (ppm) -62.9. HRMS (ESI): *m/z* [M + Na]<sup>+</sup> calcd for C<sub>17</sub>H<sub>16</sub>NO<sub>3</sub>F<sub>3</sub>S: 394.0695; found: 394.0696.

### ***N*-(2-(1-Hydroxyallyl)-4-methoxyphenyl)-4-methylbenzenesulfonamide(1e)**

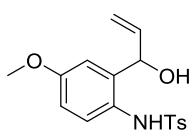

White solid, 75% yield, thick oil. <sup>1</sup>H NMR (400 MHz, CDCl<sub>3</sub>) δ (ppm) 7.61 – 7.58 (m, 2H), 7.34 (s, 1H), 7.23 (d, *J* = 7.9 Hz, 2H), 7.20 – 7.17 (m, 1H), 6.74 – 6.73 (m, 2H), 5.86 – 5.77 (m, 1H), 5.25 – 5.14 (m, 2H), 5.04 (s, 1H), 3.76 (s, 3H), 2.52 (d, *J* = 3.9 Hz, 1H), 2.40 (s, 3H). <sup>13</sup>C NMR (100 MHz, CDCl<sub>3</sub>) δ (ppm) 157.6, 143.7, 137.6, 136.6, 136.6, 129.5, 127.6, 127.3, 126.4, 116.3, 113.6, 113.6, 72.6, 55.4, 21.5. HRMS (ESI): *m/z* [M + Na]<sup>+</sup> calcd for C<sub>17</sub>H<sub>19</sub>NO<sub>4</sub>S: 356.0927; found: 356.0926.

### ***N*-(4-Chloro-2-(1-hydroxyallyl)phenyl)-4-methylbenzenesulfonamide(1f)**

White solid, 88% yield, M.P: 81-83 °C. <sup>1</sup>H NMR (400 MHz, CDCl<sub>3</sub>) δ (ppm) 8.19 (s, 1H), 7.64 – 7.61 (m, 2H), 7.38 – 7.35 (m, 1H), 7.23 (d, *J* = 7.9 Hz, 2H), 7.17 – 7.15 (m, 1H), 7.06 (s, 1H), 5.80 – 5.73 (m, 1H), 5.22 –



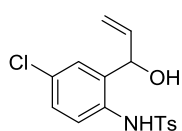

5.12 (m, 2H), 5.02 (d,  $J = 5.2$  Hz, 1H), 3.01 (s, 1H), 2.38 (s, 3H).  $^{13}\text{C}$  NMR (100 MHz,  $\text{CDCl}_3$ )  $\delta$  (ppm) 144.1, 136.8, 136.1, 134.2, 133.6, 130.1, 129.6, 128.7, 128.7, 128.2, 127.2, 123.4, 116.9, 73.6, 73.5, 21.5. HRMS (ESI):  $m/z$   $[\text{M} + \text{Na}]^+$  calcd for  $\text{C}_{16}\text{H}_{16}\text{NO}_3\text{SCl}$ : 360.0432;

found: 360.0427.

#### *N*-(2-Fluoro-6-(1-hydroxyallyl)phenyl)-4-methylbenzenesulfonamide(1g)

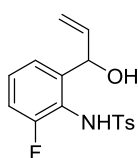

White solid, 82% yield, M.P: 112-114 °C.  $^1\text{H}$  NMR (400 MHz,  $\text{CDCl}_3$ )  $\delta$  (ppm) 7.58 (d,  $J = 8.0$  Hz, 2H), 7.30 – 7.24 (m, 4H), 6.88 – 6.83 (m, 1H), 6.51 (s, 1H), 6.09-6.01 (m, 1H), 5.79 (d,  $J = 4.5$  Hz, 1H), 5.49 (d,  $J = 17.1$  Hz, 1H), 5.29 (d,  $J = 10.5$  Hz, 1H), 3.21 (d,  $J = 3.7$  Hz, 1H), 2.43

(s, 3H).  $^{13}\text{C}$  NMR (100 MHz,  $\text{CDCl}_3$ )  $\delta$  (ppm) 157.8 (d,  $J = 249.3$  Hz), 143.8 (d,  $J = 70.7$  Hz), 138.2, 135.9, 129.5, 129.1 (d,  $J = 8.4$  Hz), 127.4, 124.5, 124.4, 121.6 (d,  $J = 13.6$  Hz), 115.5, 115.0 (d,  $J = 20.8$  Hz), 77.3, 77.0, 69.4, 69.4, 21.6.  $^{19}\text{F}$  NMR (376 MHz,  $\text{CDCl}_3$ )  $\delta$  (ppm) -121.0. HRMS (ESI):  $m/z$   $[\text{M} + \text{Na}]^+$  calcd for  $\text{C}_{16}\text{H}_{16}\text{NO}_3\text{FS}$ : 344.0727; found: 344.0719.

#### *N*-(3-(1-Hydroxyallyl)naphthalen-2-yl)-4-methylbenzenesulfonamide(1h)

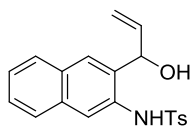

White solid, 72% yield, thick oil.  $^1\text{H}$  NMR (400 MHz,  $\text{CDCl}_3$ )  $\delta$  (ppm) 8.43 (s, 1H), 7.90 (s, 1H), 7.72 – 7.66 (m, 4H), 7.50 (s, 1H), 7.43 – 7.37 (m, 2H), 7.13 (d,  $J = 7.9$  Hz, 2H), 5.97-5.89 (m, 1H), 5.22 – 5.14 (m, 3H), 2.94 (s, 1H), 2.31 (s, 3H).  $^{13}\text{C}$  NMR (100 MHz,  $\text{CDCl}_3$ )  $\delta$

(ppm) 143.8, 137.6, 136.7, 133.7, 133.3, 130.8, 130.2, 129.5, 127.7, 127.6, 127.4, 127.3, 126.8, 125.6, 118.8, 116.7, 74.6, 21.5. HRMS (ESI):  $m/z$   $[\text{M} + \text{Na}]^+$  calcd for  $\text{C}_{20}\text{H}_{19}\text{NO}_3\text{S}$ : 376.0978; found: 376.0976.

Substrate **2a**, **2n**, **2o** were commercially available, **2b-2j**, **2l-2m**, **2p** were prepared according to the reported procedures.<sup>2-5</sup> Chiral ligands (*R*)-**L1** and (*S*)-**L1** were synthesised according to the literatures.<sup>6</sup> Substrate **6** was prepared according to the reported procedure.<sup>7</sup> Substrate **2k** was prepared through two steps as shown below.

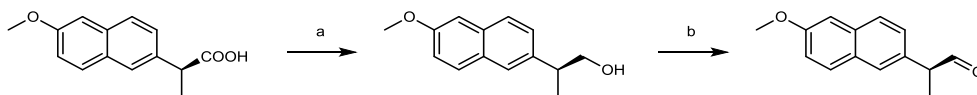

(a)  $\text{LiAlH}_4$  (2.0 eq.), THF, 0 °C; (b)  $\text{PhI}(\text{OAc})_2$  (1.1 eq.), TEMPO (0.1 eq.), DCM, RT.

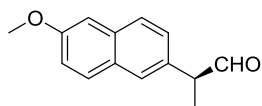

White solid, 65% yield, M.P: 70-71 °C.  $^1\text{H}$  NMR (400 MHz,  $\text{CDCl}_3$ )  $\delta$  (ppm) 9.74 (t,  $J = 1.0$  Hz, 1H), 7.73 (dd,  $J = 14.0, 8.7$  Hz, 2H), 7.60 (s, 1H), 7.29 – 7.26 (m, 1H), 7.18

– 7.13 (m, 2H), 3.92 (s, 3H), 3.79 – 7.74 (m, 1H), 1.52 (d,  $J = 7.1$  Hz, 3H).  $^{13}\text{C}$  NMR (100 MHz,  $\text{CDCl}_3$ )  $\delta$  (ppm) 201.2, 157.8, 133.8, 132.6, 129.2, 129.1, 127.6, 127.0, 126.7, 119.3, 105.5, 55.3, 52.9, 14.6. HRMS (ESI):  $m/z$   $[\text{M} + \text{Na}]^+$  calcd for  $\text{C}_{14}\text{H}_{14}\text{O}_2$ : 237.0886; found: 237.0897.

## General procedure for the one-pot cyclization/PCC oxidation reaction

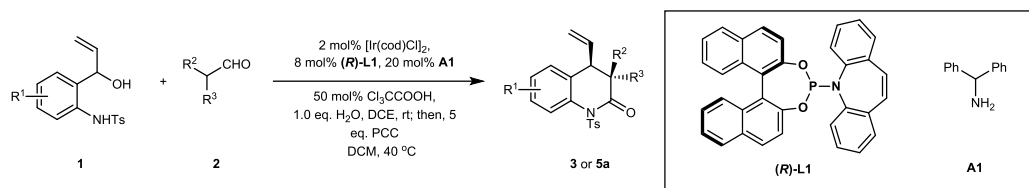

**Supplementary procedure B:** In a dried Schlenk tube under  $N_2$ ,  $[Ir(cod)Cl]_2$  (0.005 mmol, 3.35 mg) and chiral ligand **(R)-L1** (0.02 mmol, 10.15 mg) were mixed in 0.5 mL DCE and stirred at ambient temperature for 20 min under argon atmosphere. Then allylic alcohol **1** (0.25 mmol, 1.0 eq), aldehyde **2** (0.5 mmol, 2.0 eq),  $Cl_3CCOOH$  (0.125 mmol, 20.4 mg), amine **A1** (0.05 mmol, 9.2 mg, 8.7  $\mu$ L), 4.5  $\mu$ L  $H_2O$  (1.0 eq.) were added to the mixture successively. The reaction mixture was stirred at ambient temperature until substrate **1** disappeared on TLC. Then the mixture was diluted with 5 mL DCM, and PCC (275 mg, 5.0 eq.) and 100 mg silica gel were added to the mixture. The mixture was stirred at 40 °C for 10 h and the final product was achieved by flash column chromatography.

## General procedure for the one-pot cyclization/IBX oxidation reaction

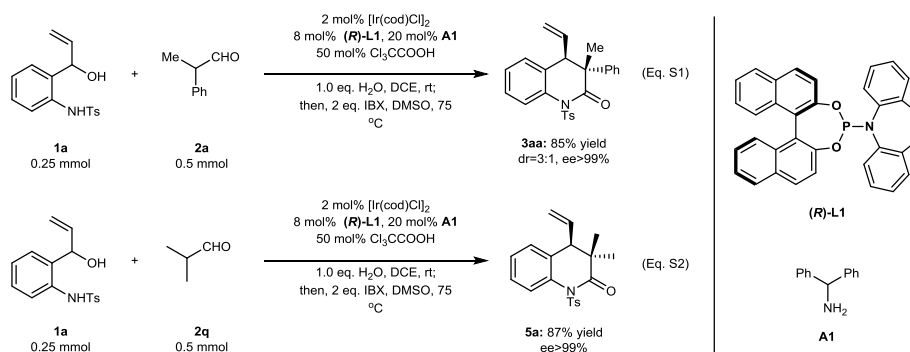

**Supplementary procedure C:** In a dried Schlenk tube under  $N_2$ ,  $[Ir(cod)Cl]_2$  (0.005 mmol, 3.35 mg) and chiral ligand **(R)-L1** (0.02 mmol, 10.15 mg) were mixed in 0.5 mL DCE and stirred at ambient temperature for 20 min under argon atmosphere. Then allylic alcohol **1** (0.25 mmol, 1.0 eq), aldehyde **2** (0.5 mmol, 2.0 eq),  $Cl_3CCOOH$  (0.125 mmol, 20.4 mg), amine **A1** (0.05 mmol, 9.2 mg, 8.7  $\mu$ L), 4.5  $\mu$ L  $H_2O$  (1.0 eq.) were added to the mixture successively. The reaction mixture was stirred at ambient temperature until substrate **1** disappeared on TLC. After removing the solvent under reduced pressure, 4 mL DMSO and 2.0 eq IBX were added and the mixture was stirred at 75 °C for 12 h. Then water (10 mL) was added and the aqueous phase was extracted with ethyl acetate (4 $\times$ 5 mL). The combined organic layers were dried over  $Na_2SO_4$ , filtered and concentrated in vacuo. Finally, the residue was purified by flash silica gel chromatography to get the title compound.

## Supplementary procedure for the synthesis of 5b

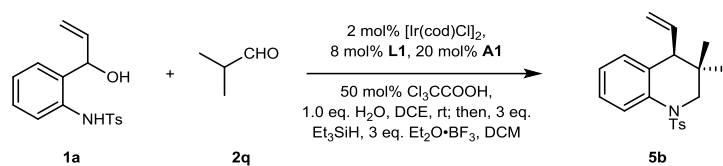

**Supplementary procedure D:** After the first step (as **Supplementary procedure B**), the mixture was diluted with 3 mL DCM under N<sub>2</sub>, cooled to 0 °C in ice bath; then Et<sub>3</sub>SiH (3.0 eq., 87.2 mg, 120 μL) and BF<sub>3</sub>·Et<sub>2</sub>O (3.0 eq., 106.4 mg, 93 μL) were added successively. The mixture was stirred at 0 °C until the hemiaminal was disappeared determined by TLC. The residue was directly purified by flash silica gel chromatography to afford the title compound as a white solid.

## Procedure for the synthesis of 5c

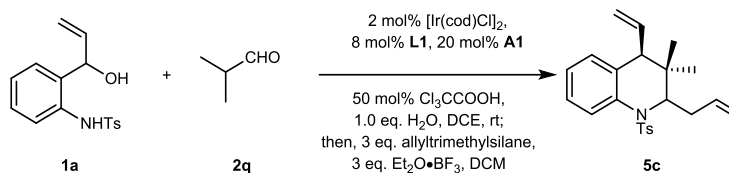

**Supplementary procedure E:** After the first step (as **Supplementary procedure B**), the mixture was diluted with 3 mL DCM under N<sub>2</sub>, cooled to 0 °C in ice bath; then allyltrimethylsilane (3.0 eq., 85.7 mg, 119 μL) and BF<sub>3</sub>·Et<sub>2</sub>O (3.0 eq., 106.4 mg, 93 μL) were added successively. The mixture was stirred at 0 °C until the hemiaminal was disappeared determined by TLC. The residue was directly purified by flash silica gel chromatography to afford the title compound as a white solid.

## Procedure for the synthesis of 5d

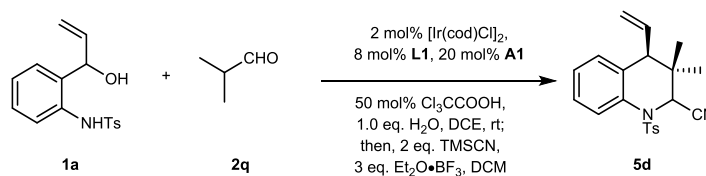

**Supplementary procedure F:** After the first step (as **Supplementary procedure B**), the mixture was diluted with 3 mL DCM under N<sub>2</sub>, cooled to 0 °C in ice bath; then nucleophiles (2.0 eq., 50 mg, 63 μL) and BF<sub>3</sub>·Et<sub>2</sub>O (3.0 eq., 106.4 mg, 93 μL) were added successively. The mixture was stirred at 0 °C until the hemiaminal was disappeared determined by TLC. The residue was directly purified by flash chromatography to afford the title compound as a white solid.

### Procedure for the synthesis of 5e

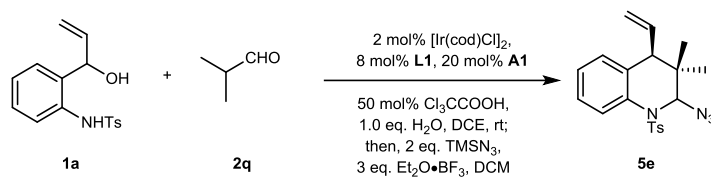

**Supplementary procedure G:** After the first step (as **Supplementary procedure B**), the mixture was diluted with 3 mL DCM under N<sub>2</sub>, cooled to 0 °C in ice bath; then TMSN<sub>3</sub> (2.0 eq., 58 mg, 68 μL) and BF<sub>3</sub>·Et<sub>2</sub>O (3.0 eq., 106.4 mg, 93 μL) were added successively. The mixture was stirred at 0 °C until the hemiaminal was disappeared determined by TLC. The residue was directly purified by flash silica gel chromatography to afford the title compound as a white solid.

### Procedure for the synthesis of 5f

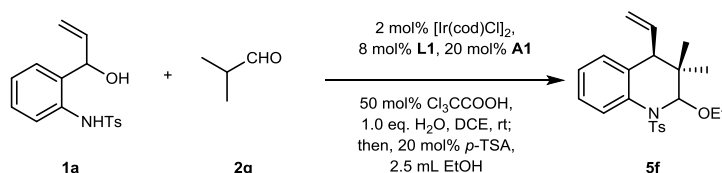

**Supplementary procedure H:** After the first step (as **Supplementary procedure B**), the solvent was removed *in vacuo* and *p*-TSA (20 mol%, 9.5 mg) and 2.5 mL EtOH was added under N<sub>2</sub>. The mixture was stirred at 30 °C until the hemiaminal was disappeared determined by TLC. The residue was concentrated and purified by flash silica gel chromatography to afford the title compound as a white solid.

### Procedure for the synthesis of 5g

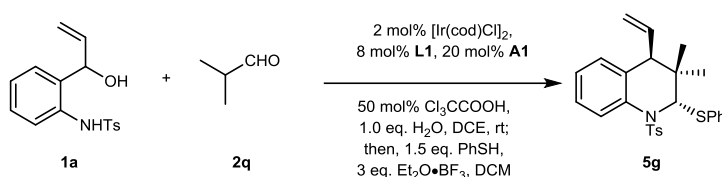

**Supplementary procedure I:** After the first step (as **Supplementary procedure B**), the mixture was diluted with 3 mL DCM under N<sub>2</sub>, cooled to 0 °C in ice bath; then PhSH (1.5 eq., 41 mg, 38 μL) and BF<sub>3</sub>·Et<sub>2</sub>O (3.0 eq., 106.4 mg, 93 μL) were added successively. The mixture was stirred at 0 °C until the hemiaminal was disappeared determined by TLC. The residue was directly purified by flash silica gel chromatography to afford the title compound as a white solid.

## Procedure for the synthesis of 5h and 5i

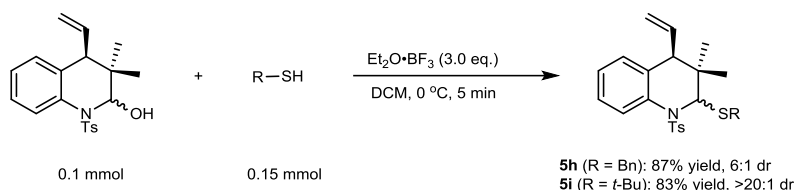

**Supplementary procedure J:** the mixture was diluted with 3 mL DCM under N<sub>2</sub>, cooled to 0 °C in ice bath; then BnSH or *t*BuSH (1.5 eq.) and BF<sub>3</sub>·Et<sub>2</sub>O (3.0 eq.) were added successively. The mixture was stirred at 0 °C until the hemiaminal was disappeared determined by TLC. The residue was directly purified by flash silica gel chromatography to afford the title compound as colorless oil.

## Procedure for the removal of N-Ts group

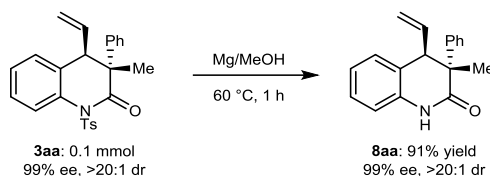

**Supplementary procedure K:** Under argon atmosphere, a flame-dried 10 ml Schlenk tube was charged with charged 4aa (41.7 mg, 0.1 mmol, 99% ee, >20:1 d.r.), Mg (240 mg, 10 mmol, 200-300 mesh), and anhydrous MeOH (5 mL). The resulting solution was heated at 60 °C for 1 h. Then saturated NH<sub>4</sub>Cl (3 mL) was added to the reaction mixture to quench excess magnesium powder. The aqueous phase was extracted with ethyl acetate (4×5 mL). The combined organic layers were dried over Na<sub>2</sub>SO<sub>4</sub>, filtered and concentrated in vacuo. Then the residue was purified by flash silica gel chromatography (Petrol ether/EtOAc = 5/1) to afford the product **8aa** in 91% yield (24 mg, 99% ee, >20:1 d.r.).

## Procedure for the synthesis of 7

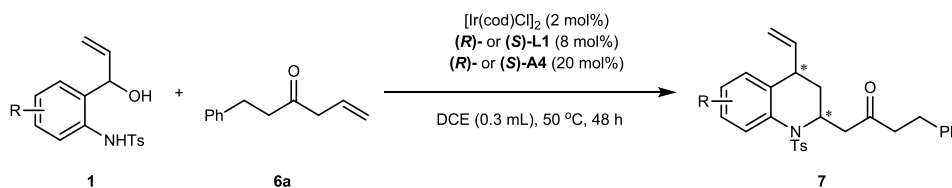

**Supplementary procedure L:** In a dried Schlenk tube under N<sub>2</sub>, [Ir(cod)Cl]<sub>2</sub> (0.005 mmol, 3.35 mg) and chiral ligand (**R**)-**L** or (**S**)-**L1** (0.02 mmol, 10.15 mg) were mixed in 0.3 mL DCE and stirred at ambient temperature for 20 min under argon atmosphere. Then allylic alcohol **1** (0.25 mmol, 1.0 eq), ketone **2** (0.5 mmol, 2.0 eq) and chiral amine catalyst (**S**)-**A4** or (**R**)-**A4** (0.05 mmol, 16.1 mg) were added to the mixture successively. After 8 h, the other 3.0 eq. ketone **2** was added in portions. Stirring at 50 °C for 48 h. The residue was directly purified by flash silica gel chromatography to afford the title compound.

## Procedure for the synthesis of **3ar**

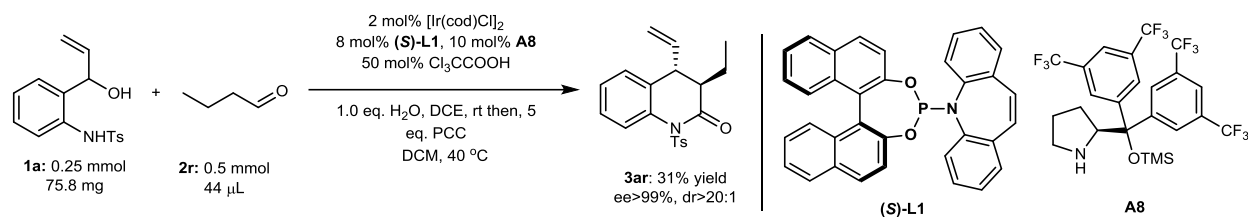

**Supplementary procedure M:** In a dried Schlenk tube under  $\text{N}_2$ ,  $[\text{Ir}(\text{cod})\text{Cl}]_2$  (0.005 mmol, 3.35 mg) and chiral ligand **(S)-L1** (0.02 mmol, 10.15 mg) were mixed in 0.5 mL DCE and stirred at ambient temperature for 20 min under argon atmosphere. Then allylic alcohol **1a** (0.25 mmol, 1.0 eq), aldehyde **2r** (0.5 mmol, 2.0 eq),  $\text{Cl}_3\text{CCOOH}$  (0.125 mmol, 20.4 mg), chiral amine catalyst **A8** (0.025 mmol, 14.9 mg), 4.5  $\mu\text{L}$   $\text{H}_2\text{O}$  (1.0 eq.) were added to the mixture successively. The reaction mixture was stirred at ambient temperature until substrate **1a** disappeared on TLC. Then the mixture was diluted with 5 mL DCM, and PCC (275 mg, 5.0 eq.) and 100 mg silica gel were added to the mixture. The mixture was stirred at 40 °C for 10 h and the final product **3ar** was achieved by flash column chromatography.

### **(3R,4R)-3-Methyl-3-phenyl-1-tosyl-4-vinyl-3,4-dihydroquinolin-2(1H)-one (3aa)**

White solid, 64% yield.  $[\alpha]_{\text{D}}^{25} = -21.7$  ( $c = 1.00$  in  $\text{CHCl}_3$ ); ee = 99%, dr > 95:5, determined by HPLC analysis (Chiralpak OD column, hexane/*i*-PrOH, 90:10 v/v, flow rate 1 mL/min,  $\lambda = 254$  nm, 25 °C),  $t_{\text{R}}$  (major) = 9.60 min,  $t_{\text{R}}$  (minor) = 19.22 min;  $^1\text{H NMR}$  (400 MHz,  $\text{CDCl}_3$ )  $\delta$  (ppm) 7.99 (d,  $J = 8.3$  Hz, 2H), 7.57 (d,  $J = 8.2$  Hz, 1H), 7.37 (d,  $J = 8.1$  Hz, 2H), 7.16 – 7.00 (m, 6H), 6.96 (m, 2H), 5.69 (m, 1H), 5.30 – 5.04 (m, 2H), 3.79 (d,  $J = 8.1$  Hz, 1H), 2.48 (s, 3H), 1.39 (s, 3H);  $^{13}\text{C NMR}$  (100 MHz,  $\text{CDCl}_3$ )  $\delta$  (ppm) 173.6, 145.0, 141.0, 136.5, 134.2, 134.1, 131.5, 129.3, 129.1, 128.4, 128.0, 127.1, 126.8, 126.1, 125.3, 123.2, 119.4, 53.4, 52.4, 24.7, 21.7; HRMS (ESI) for:  $\text{C}_{25}\text{H}_{23}\text{NO}_3\text{S}$   $[\text{M}+\text{H}]^+$ : calcd 418.1480, found 418.1471.

### **(3R,4R)-3,7-Dimethyl-3-phenyl-1-tosyl-4-vinyl-3,4-dihydroquinolin-2(1H)-one (3ba)**

White solid, 59% yield;  $[\alpha]_{\text{D}}^{25} = -33.6$  ( $c = 1.00$  in  $\text{CHCl}_3$ ); ee = 96%, d.r. = 94:6, determined by HPLC analysis (Chiralpak OD column, hexane/*i*-PrOH, 90:10 v/v, flow rate 1 mL/min,  $\lambda = 254$  nm, 25 °C),  $t_{\text{R}}$  (major) = 28.00 min,  $t_{\text{R}}$  (minor) = 12.03 min;  $^1\text{H NMR}$  (400 MHz,  $\text{CDCl}_3$ )  $\delta$  (ppm) 7.98 (d,  $J = 8.4$  Hz, 2H), 7.41 – 7.36 (m, 3H), 7.07 (m, 3H), 6.99 – 6.91 (m, 3H), 6.84 (d,  $J = 7.9$  Hz, 1H), 5.71 – 5.62 (m, 1H), 5.23 – 5.06 (m, 2H), 3.76 (d,  $J = 8.1$  Hz, 1H), 2.48 (s, 3H), 2.26 (s, 3H), 1.36 (s, 3H).  $^{13}\text{C NMR}$  (100 MHz,  $\text{CDCl}_3$ )  $\delta$  (ppm) 173.8, 145.0, 141.2, 137.0, 136.6, 134.5, 133.9, 129.3, 129.2,

128.5, 127.7, 127.0, 126.8, 125.4, 123.8, 119.2, 117.2, 53.4, 52.0, 24.8, 21.8, 21.4. HRMS (ESI) for:  $C_{26}H_{25}NO_3S$   $[M+H]^+$ : calcd 432.1628, found 432.1636.

**(3R,4R)-7-Fluoro-3-methyl-3-phenyl-1-tosyl-4-vinyl-3,4-dihydroquinolin-2(1H)-one (3ca)**

White solid, 59% yield;  $[\alpha]_D^{25} = -4.0$  ( $c = 1.00$  in  $CHCl_3$ ); ee = 94%, d.r. = 89:11, determined by HPLC analysis (Chiralpak OD column, hexane/*i*-PrOH, 90:10 v/v, flow rate 1 mL/min,  $\lambda = 254$  nm, 25 °C),  $t_R$  (major) = 8.05 min,  $t_R$  (minor) = 22.40 min;  $^1H$  NMR (400 MHz,  $CDCl_3$ )  $\delta$  (ppm) 7.98 (d,  $J = 8.4$  Hz, 2H), 7.38 (m, 3H), 7.12 – 7.05 (m, 3H), 7.01 (dd,  $J = 8.4, 6.1$  Hz, 1H), 6.98 – 6.91 (m, 2H), 6.75 (m, 1H), 5.70-5.62 (m, 1H), 5.21 – 5.09 (m, 2H), 3.79 (d,  $J = 7.9$  Hz, 1H), 2.49 (s, 3H), 1.38 (s, 3H);  $^{13}C$  NMR (100 MHz,  $CDCl_3$ )  $\delta$  (ppm) 173.2, 161.0 (d,  $J = 245.1$  Hz), 145.3, 140.7, 136.2, 135.0 (d,  $J = 10.8$  Hz), 133.9, 129.4, 129.1, 128.9 (d,  $J = 9.6$  Hz), 128.6, 127.2, 127.0, 125.2, 119.6, 113.0 (d,  $J = 21.6$  Hz), 111.0 (d,  $J = 27.1$  Hz), 53.3, 51.7, 24.7, 21.8.  $^{19}F$  NMR (376 MHz,  $CDCl_3$ )  $\delta$  (ppm) -112.9. HRMS (ESI) for:  $C_{25}H_{22}FNO_3S$   $[M+H]^+$ : calcd 436.1377, found 436.1382.

**(3R,4R)-3-Methyl-3-phenyl-1-tosyl-7-(trifluoromethyl)-4-vinyl-3,4-dihydroquinolin-2(1H)-one (3da)**

White solid, 66% yield;  $[\alpha]_D^{25} = -24.8$  ( $c = 1.00$  in  $CHCl_3$ ); ee = 98%, d.r. = 85:15, determined by HPLC analysis (Chiralpak OD column, hexane/*i*-PrOH, 90:10 v/v, flow rate 1 mL/min,  $\lambda = 254$  nm, 25 °C),  $t_R$  (major) = 7.58 min,  $t_R$  (minor) = 13.98 min;  $^1H$  NMR (400 MHz,  $CDCl_3$ )  $\delta$  (ppm) 7.99 (d,  $J = 8.1$  Hz, 2H), 7.86 (s, 1H), 7.39 (d,  $J = 8.1$  Hz, 2H), 7.29 (m, 1H), 7.18 (d,  $J = 7.9$  Hz, 1H), 7.12 – 7.01 (m, 3H), 6.97 – 6.92 (m, 2H), 5.66 (m, 1H), 5.32 – 5.05 (m, 2H), 3.86 (d,  $J = 8.0$  Hz, 1H), 2.49 (s, 3H), 1.40 (s, 3H);  $^{13}C$  NMR (100 MHz,  $CDCl_3$ )  $\delta$  (ppm) 172.9, 145.4, 140.3, 136.1, 135.3, 134.6, 133.3, 129.7, 129.4, 129.2, 128.7, 128.4, 127.2, 125.1, 124.9, 122.8 (q,  $J = 3.7$  Hz), 122.2, 120.2 (d,  $J = 4.4$  Hz), 53.2, 52.3, 24.6, 21.7;  $^{19}F$  NMR (377 MHz,  $CDCl_3$ )  $\delta$  (ppm) -62.9; HRMS (ESI) for:  $C_{26}H_{22}NO_3F_3S$   $[M+H]^+$ : calcd 486.1350, found 486.1345.

**(3R,4R)-6-Methoxy-3-methyl-3-phenyl-1-tosyl-4-vinyl-3,4-dihydroquinolin-2(1H)-one (3ea)**

White solid, 61% yield;  $[\alpha]_D^{25} = -37.0$  ( $c = 1.00$  in  $CHCl_3$ ); ee = 99%, >95:5 d.r., determined by HPLC analysis (Chiralpak OD column, hexane/*i*-PrOH, 90:10 v/v, flow rate 1 mL/min,  $\lambda = 254$  nm, 25 °C),  $t_R$  (major) = 11.04 min;  $^1H$  NMR (400 MHz,  $CDCl_3$ )  $\delta$  (ppm) 7.98 – 7.96 (m, 2H), 7.48 (d,  $J = 9.0$  Hz, 1H), 7.36 (d,  $J = 8.0$  Hz, 2H), 7.11 – 6.97 (m, 5H), 6.66 – 6.59 (m, 2H), 5.64 – 5.55 (m, 1H), 5.26 – 5.09 (m, 2H), 3.75 – 3.72 (m, 4H), 2.47 (s, 3H), 1.36 (s, 3H);  $^{13}C$  NMR (100 MHz,  $CDCl_3$ )  $\delta$  (ppm) 173.5, 157.5, 144.9, 141.0, 136.5, 134.1, 133.1, 129.2, 129.1, 128.4, 127.3, 126.8,

125.3, 124.5, 119.4, 113.6, 111.8, 55.4, 53.4, 52.7, 24.7, 21.7; HRMS (ESI) for: C<sub>26</sub>H<sub>25</sub>NO<sub>4</sub>S [M+H]<sup>+</sup>: calcd 448.1586, found 448.1577.

**(3R,4R)-6-Chloro-3-methyl-3-phenyl-1-tosyl-4-vinyl-3,4-dihydroquinolin-2(1H)-one (3fa)**

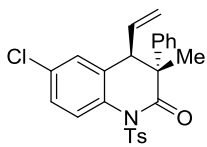

White solid, 60% yield;  $[\alpha]_{\text{D}}^{25} = -32.3$  ( $c = 1.00$  in CHCl<sub>3</sub>); ee = 99%, d.r. = 92:8, determined by HPLC analysis (Chiralpak OD column, hexane/*i*-PrOH, 90:10 v/v, flow rate 1 mL/min,  $\lambda = 254$  nm, 25 °C),  $t_{\text{R}}$  (major) = 8.50 min,  $t_{\text{R}}$  (minor) = 17.78 min; <sup>1</sup>H NMR (400 MHz, CDCl<sub>3</sub>)  $\delta$  (ppm) 7.96 (d,  $J = 7.9$  Hz, 2H), 7.52 (d,  $J = 8.7$  Hz, 1H), 7.38 (d,  $J = 8.0$  Hz, 2H), 7.17 – 7.01 (m, 5H), 6.96 (d,  $J = 7.5$  Hz, 2H), 5.72 – 5.48 (m, 1H), 5.16 (m, 2H), 3.76 (d,  $J = 8.1$  Hz, 1H), 2.48 (s, 3H), 1.37 (s, 3H); <sup>13</sup>C NMR (100 MHz, CDCl<sub>3</sub>)  $\delta$  (ppm) 173.1, 145.3, 140.5, 136.1, 133.4, 133.3, 132.7, 131.6, 129.3, 129.2, 128.6, 127.7, 127.2, 127.1, 125.2, 124.5, 120.0, 53.2, 52.1, 24.6, 21.8; HRMS (ESI) for: C<sub>25</sub>H<sub>22</sub>NO<sub>3</sub>SCl [M+H]<sup>+</sup>: calcd 452.1088, found 452.1082.

**(3R,4R)-8-Fluoro-3-methyl-3-phenyl-1-tosyl-4-vinyl-3,4-dihydroquinolin-2(1H)-one (3ga)**

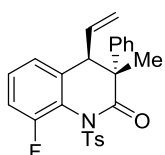

White solid, 73% yield;  $[\alpha]_{\text{D}}^{25} = 16.1$  ( $c = 1.00$  in CHCl<sub>3</sub>); ee = 99%, >95:5 d.r., determined by HPLC analysis (Chiralpak IC column, hexane/*i*-PrOH, 90:10 v/v, flow rate 1 mL/min,  $\lambda = 254$  nm, 25 °C),  $t_{\text{R}}$  (major) = 33.49 min,  $t_{\text{R}}$  (minor) = 23.95 min; <sup>1</sup>H NMR (400 MHz, CDCl<sub>3</sub>)  $\delta$  (ppm) 8.23 (d,  $J = 8.1$  Hz, 2H), 7.40 (d,  $J = 8.1$  Hz, 2H), 7.04 (m, 4H), 6.95 – 6.90 (m, 2H), 6.87 (d,  $J = 7.8$  Hz, 2H), 6.07 (m, 1H), 5.49 – 5.15 (m, 2H), 3.87 (d,  $J = 8.2$  Hz, 1H), 2.49 (s, 3H), 1.50 (s, 3H); <sup>13</sup>C NMR (100 MHz, CDCl<sub>3</sub>)  $\delta$  (ppm) 174.4, 156.3, 153.8, 145.1, 140.9, 136.5, 135.9, 129.6 (d,  $J = 3.7$  Hz), 129.2, 128.5, 127.9 (d,  $J = 8.3$  Hz), 126.9, 125.0, 123.3, 122.4 (d,  $J = 11.6$  Hz), 120.2, 115.1 (d,  $J = 21.2$  Hz), 54.8, 53.3, 25.3, 21.7; <sup>19</sup>F NMR (377 MHz, CDCl<sub>3</sub>)  $\delta$  (ppm) -112.9; HRMS (ESI) for: C<sub>25</sub>H<sub>22</sub>NO<sub>3</sub>FS [M+H]<sup>+</sup>: calcd 436.1386, found 436.1377.

**(3R,4R)-3-Methyl-3-phenyl-1-tosyl-4-vinyl-3,4-dihydrobenzo[*g*]quinolin-2(1H)-one (3ha)**

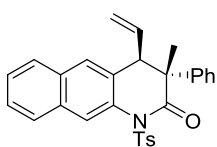

White solid, 63% yield;  $[\alpha]_{\text{D}}^{25} = -106.8$  ( $c = 1.00$  in CHCl<sub>3</sub>); ee = 98%, d.r. = 92:8, determined by HPLC analysis (Chiralpak OD column, hexane/*i*-PrOH, 90:10 v/v, flow rate 1 mL/min,  $\lambda = 254$  nm, 25 °C),  $t_{\text{R}}$  (major) = 11.86 min,  $t_{\text{R}}$  (minor) = 25.15 min; <sup>1</sup>H NMR (400 MHz, CDCl<sub>3</sub>)  $\delta$  (ppm) 8.05 – 7.99 (m, 3H), 7.79 – 7.67 (m, 2H), 7.53 (s, 1H), 7.41 – 7.36 (m, 4H), 7.03 – 7.01 (m, 4H), 6.97 – 6.95 (m, 1H), 5.76–5.66 (m, 1H), 5.31 – 5.09 (m, 2H), 4.01 (d,  $J = 7.9$  Hz, 1H), 2.48 (s, 3H), 1.42 (s, 3H). <sup>13</sup>C NMR (100 MHz, CDCl<sub>3</sub>)  $\delta$  (ppm) 173.5, 145.1, 140.8, 136.4, 134.4, 132.1, 131.6,



131.2, 130.5, 129.3, 128.5, 128.3, 126.9, 126.6, 126.2, 126.2, 125.4, 121.3, 119.6, 53.4, 52.5, 29.7, 21.8. HRMS (ESI) for: C<sub>29</sub>H<sub>25</sub>NO<sub>3</sub>SBr [M+H]<sup>+</sup>: calcd 468.1628, found 468.1622.

**(3R,4R)-3-(4-Chlorophenyl)-3-methyl-1-tosyl-4-vinyl-3,4-dihydroquinolin-2(1H)-one (3ab)**

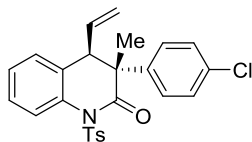

White solid, 61% yield;  $[\alpha]_{\text{D}}^{25} = -8.9$  ( $c = 1.00$  in CHCl<sub>3</sub>); ee > 99%, d.r. = 88:12, determined by HPLC analysis (Chiralpak IF column, hexane/*i*-PrOH, 90:10 v/v, flow rate 1 mL/min,  $\lambda = 254$  nm, 25 °C),  $t_{\text{R}}$  (major) = 17.96 min,  $t_{\text{R}}$  (minor) = 16.08 min; <sup>1</sup>H

**NMR** (400 MHz, CDCl<sub>3</sub>)  $\delta$  (ppm) 7.98 (d,  $J = 8.4$  Hz, 2H), 7.58 (d,  $J = 8.2$  Hz, 1H), 7.37 (d,  $J = 8.1$  Hz, 2H), 7.19 – 7.14 (m, 1H), 7.08 – 7.02 (m, 4H), 6.89 (d,  $J = 8.7$  Hz, 2H), 6.70 – 5.61 (m, 1H), 5.21 – 5.12 (m, 2H), 3.75 (d,  $J = 8.1$  Hz, 1H), 2.48 (s, 3H), 1.35 (s, 3H); <sup>13</sup>C **NMR** (100 MHz, CDCl<sub>3</sub>)  $\delta$  (ppm) 173.1, 145.2, 139.6, 136.3, 134.0, 133.8, 132.6, 131.2, 129.3, 129.1, 128.6, 127.9, 127.4, 126.8, 126.3, 123.2, 119.7, 53.0, 52.2, 24.6, 21.7; HRMS (ESI) for: C<sub>25</sub>H<sub>22</sub>NO<sub>3</sub>SCl [M+H]<sup>+</sup>: calcd 452.1081, found 452.1082.

**(3R,4R)-3-(4-Fluorophenyl)-3-methyl-1-tosyl-4-vinyl-3,4-dihydroquinolin-2(1H)-one (3ac)**

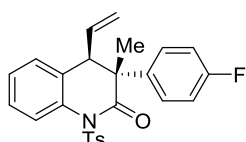

White solid, 55% yield;  $[\alpha]_{\text{D}}^{25} = -14.3$  ( $c = 1.00$  in CHCl<sub>3</sub>); ee = 96%, d.r. = 92:8, determined by HPLC analysis (Chiralpak AZ column, hexane/*i*-PrOH, 90:10 v/v, flow rate 1 mL/min,  $\lambda = 254$  nm, 25 °C),  $t_{\text{R}}$  (major) = 31.47 min,  $t_{\text{R}}$  (minor) = 29.11 min; <sup>1</sup>H

**NMR** (400 MHz, CDCl<sub>3</sub>)  $\delta$  (ppm) 7.98 (d,  $J = 8.5$  Hz, 2H), 7.58 (d,  $J = 8.1$  Hz, 1H), 7.37 (d,  $J = 8.1$  Hz, 2H), 7.16 (m, 1H), 7.10 – 7.03 (m, 2H), 6.98 – 6.88 (m, 2H), 6.80 – 6.72 (m, 2H), 5.65 (m, 1H), 5.25 – 5.05 (m, 2H), 3.74 (d,  $J = 8.1$  Hz, 1H), 2.48 (s, 3H), 1.36 (s, 3H); <sup>13</sup>C **NMR** (100 MHz, CDCl<sub>3</sub>)  $\delta$  (ppm) 173.4, 162.5, 160.1, 145.1, 136.8 (d,  $J = 3.5$  Hz), 136.4, 134.1, 133.9, 131.3, 129.2 (d,  $J = 13.2$  Hz), 127.9, 127.3, 127.0 (d,  $J = 8.1$  Hz), 126.3, 123.2, 119.6, 115.3 (d,  $J = 21.3$  Hz), 52.9, 52.5, 24.6, 21.7; <sup>19</sup>F **NMR** (377 MHz, CDCl<sub>3</sub>)  $\delta$  (ppm) -115.6; HRMS (ESI) for: C<sub>25</sub>H<sub>22</sub>NO<sub>3</sub>FS [M+Na]<sup>+</sup>: calcd 458.1204, found 458.1197.

**(3R,4R)-3-(4-Methoxyphenyl)-3-methyl-1-tosyl-4-vinyl-3,4-dihydroquinolin-2(1H)-one (3ad)**

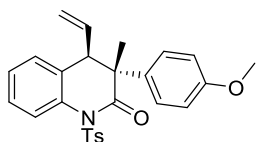

White solid, 71% yield;  $[\alpha]_{\text{D}}^{25} = -15.2$  ( $c = 1.00$  in CHCl<sub>3</sub>); ee = 99%, d.r. = 94:6, determined by HPLC analysis (Chiralpak OD column, hexane/*i*-PrOH, 90:10 v/v, flow rate 1 mL/min,  $\lambda = 254$  nm, 25 °C),  $t_{\text{R}}$  (major) = 15.98 min,  $t_{\text{R}}$  (minor) = 24.09 min; <sup>1</sup>H

**NMR** (400 MHz, CDCl<sub>3</sub>)  $\delta$  (ppm) 7.98 (d,  $J = 8.3$  Hz, 2H), 7.58 (d,  $J = 8.2$  Hz, 1H), 7.37 (d,  $J = 8.1$  Hz, 2H), 7.18 – 7.10 (m, 1H), 7.10 – 7.01 (m, 2H), 6.87 (d,  $J = 8.9$  Hz, 2H), 6.60 (d,  $J = 8.9$  Hz, 2H), 5.71-5.62 (m, 1H), 5.22 – 5.07 (m, 2H), 3.75 (d,  $J = 8.1$  Hz, 1H), 3.66 (s, 3H), 2.48 (s, 3H), 1.35 (s, 3H). <sup>13</sup>C **NMR** (100 MHz, CDCl<sub>3</sub>)  $\delta$  (ppm) 173.8, 158.1, 145.0, 136.6, 134.4, 134.1, 132.9, 131.6, 129.3, 129.2, 128.0, 127.2, 126.5, 126.2,

123.2, 119.4, 113.8, 55.1, 52.7, 52.5, 24.9, 21.8. HRMS (ESI) for: C<sub>26</sub>H<sub>25</sub>NO<sub>4</sub>S [M+H]<sup>+</sup>: calcd 448.1577, found 448.1574.

**(3R,4R)-3-(4-Isobutylphenyl)-3-methyl-1-tosyl-4-vinyl-3,4-dihydroquinolin-2(1H)-one (3ae)**

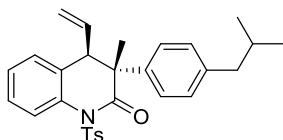

White solid, 62% yield;  $[\alpha]_D^{25} = -7.5$  ( $c = 1.00$  in CHCl<sub>3</sub>); ee = 99%, d.r. = 91:9, determined by HPLC analysis (Chiralpak OD column, hexane/*i*-PrOH, 90:10 v/v, flow rate 1 mL/min,  $\lambda = 254$  nm, 25 °C),  $t_R$  (major) = 9.03 min,  $t_R$  (minor) = 13.56

min; <sup>1</sup>H NMR (400 MHz, CDCl<sub>3</sub>)  $\delta$  (ppm) 7.99 (d,  $J = 8.0$  Hz, 2H), 7.56 (d,  $J = 8.2$  Hz, 1H), 7.37 (d,  $J = 8.0$  Hz, 2H), 7.15 – 7.08 (m, 1H), 7.07 – 6.99 (m, 2H), 6.83 (s, 4H), 5.68 (dt,  $J = 17.4, 9.1$  Hz, 1H), 5.30 – 5.09 (m, 2H), 3.76 (d,  $J = 8.2$  Hz, 1H), 2.48 (s, 3H), 2.27 (d,  $J = 7.2$  Hz, 2H), 1.76 – 1.62 (m, 1H), 1.38 (s, 3H), 0.75 (dd,  $J = 6.8, 2.5$  Hz, 6H). <sup>13</sup>C NMR (100 MHz, CDCl<sub>3</sub>)  $\delta$  (ppm) 137.8, 145.0, 140.2, 138.1, 136.5, 134.3, 134.1, 131.6, 129.3, 129.1, 129.0, 128.0, 127.0, 126.0, 125.0, 123.2, 119.3, 53.1, 52.6, 44.7, 30.0, 24.6, 22.2, 22.1, 21.7. HRMS (ESI) for: C<sub>29</sub>H<sub>31</sub>NO<sub>3</sub>S [M+H]<sup>+</sup>: calcd 474.2097, found 474.2095.

**(3R,4R)-3-Methyl-3-(*m*-tolyl)-1-tosyl-4-vinyl-3,4-dihydroquinolin-2(1H)-one (3af)**

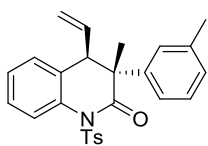

White solid, 73% yield;  $[\alpha]_D^{25} = -20.6$  ( $c = 1.00$  in CHCl<sub>3</sub>); ee = 99%, d.r. >95:5, determined by HPLC analysis (Chiralpak OD column, hexane/*i*-PrOH, 95:5 v/v, flow rate 1 mL/min,  $\lambda = 254$  nm, 25 °C),  $t_R$  (major) = 17.06 min; <sup>1</sup>H NMR (400 MHz, CDCl<sub>3</sub>)  $\delta$  (ppm) 7.99 (d,  $J = 8.0$  Hz, 2H), 7.59 (d,  $J = 8.1$  Hz, 1H), 7.37 (d,  $J = 8.1$  Hz, 2H), 7.15 – 7.11 (m, 1H), 7.07 – 7.04 (m, 2H), 6.97 – 6.93 (m, 1H), 6.83 (d,  $J = 8.1$  Hz, 1H), 6.74 (d,  $J = 10.2$  Hz, 2H), 5.73 – 5.64 (m, 1H), 5.21 – 5.11 (m, 2H), 3.79 (d,  $J = 8.1$  Hz, 1H), 2.48 (s, 3H), 2.14 (s, 3H), 1.37 (s, 3H). <sup>13</sup>C NMR (100 MHz, CDCl<sub>3</sub>)  $\delta$  (ppm) 173.7,

145.0, 140.8, 137.9, 136.5, 134.2, 134.1, 131.5, 129.3, 129.0, 128.2, 128.0, 127.6, 127.1, 126.1, 126.0, 123.1, 122.4, 119.4, 53.2, 52.3, 24.7, 21.7, 21.4. HRMS (ESI) for: C<sub>26</sub>H<sub>25</sub>NO<sub>3</sub>S [M+Na]<sup>+</sup>: calcd 454.1447, found 454.1445.

**(3R,4R)-3-(3-Bromophenyl)-3-methyl-1-tosyl-4-vinyl-3,4-dihydroquinolin-2(1H)-one (3ag)**

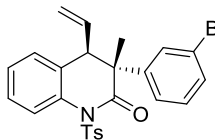

White solid, 63% yield;  $[\alpha]_D^{25} = -7.6$  ( $c = 1.00$  in CHCl<sub>3</sub>); ee = 99%, d.r. >95:5, determined by HPLC analysis (Chiralpak OZ column, hexane/*i*-PrOH, 95:5 v/v, flow rate 1 mL/min,  $\lambda = 254$  nm, 25 °C),  $t_R$  (major) = 33.42 min; <sup>1</sup>H NMR (400 MHz, CDCl<sub>3</sub>)  $\delta$  (ppm) 7.98

(d,  $J = 8.1$  Hz, 2H), 7.61 (d,  $J = 8.2$  Hz, 1H), 7.39 (d,  $J = 8.1$  Hz, 2H), 7.21 – 7.13 (m, 2H), 7.09 (d,  $J = 3.1$  Hz, 2H), 7.04 (d,  $J = 1.8$  Hz, 1H), 6.94 (d,  $J = 7.7$  Hz, 1H), 6.91 – 6.85 (m, 1H), 5.82 – 5.59 (m, 1H), 5.26 – 5.12 (m, 2H), 3.74 (d,  $J = 8.2$  Hz, 1H), 2.48 (s, 3H), 1.37 (s, 3H). <sup>13</sup>C NMR (100 MHz, CDCl<sub>3</sub>)  $\delta$  (ppm) 172.9, 145.2,

143.3, 136.3, 133.9, 133.5, 131.0, 130.1, 130.0, 129.4, 129.0, 128.6, 127.9, 127.4, 126.4, 124.1, 123.2, 122.5, 119.9, 53.2, 52.2, 24.3, 21.8. HRMS (ESI) for: C<sub>25</sub>H<sub>22</sub>BrNO<sub>3</sub>S [M+Na]<sup>+</sup>: calcd 518.0396, found 518.0403.

### 3-((3*R*,4*R*)-3-Methyl-2-oxo-1-tosyl-4-vinyl-1,2,3,4-tetrahydroquinolin-3-yl)phenyl

#### trifluoromethanesulfonate (3ah)

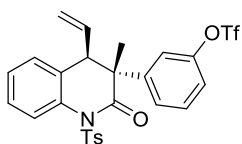

White solid, 68% yield;  $[\alpha]_D^{25} = -3.0$  ( $c = 1.00$  in CHCl<sub>3</sub>); ee = 98%, d.r. = 88:12, determined by HPLC analysis (Chiralpak OD column, hexane/*i*-PrOH, 95:5 v/v, flow rate 1 mL/min,  $\lambda = 254$  nm, 25 °C),  $t_R$  (major) = 23.88 min,  $t_R$  (minor) = 27.88 min; <sup>1</sup>H

NMR (400 MHz, CDCl<sub>3</sub>)  $\delta$  (ppm) 8.05 (d,  $J = 8.1$  Hz, 2H), 7.62 (d,  $J = 8.2$  Hz, 1H), 7.43 (d,  $J = 8.1$  Hz, 2H), 7.25 – 7.17 (m, 2H), 7.12 (s, 2H), 7.06 (d,  $J = 8.1$  Hz, 1H), 7.00 (dd,  $J = 8.2, 2.3$  Hz, 1H), 6.84 (s, 1H), 5.80 – 5.71 (m, 1H), 5.31 – 5.16 (m, 2H), 3.79 (d,  $J = 8.1$  Hz, 1H), 2.53 (s, 3H), 1.44 (s, 3H). <sup>13</sup>C NMR (100 MHz, CDCl<sub>3</sub>)  $\delta$  (ppm) 172.6, 149.4, 145.3, 144.3, 136.2, 133.8, 133.2, 130.8, 130.3, 129.4, 129.0, 127.9, 127.5, 126.5, 125.5, 123.3, 120.3, 119.7, 118.7, 53.5, 52.3, 24.0, 21.7. <sup>19</sup>F NMR (376 MHz, CDCl<sub>3</sub>)  $\delta$  -72.7. HRMS (ESI) for: C<sub>26</sub>H<sub>22</sub>F<sub>3</sub>NO<sub>6</sub>S<sub>2</sub> [M+H]<sup>+</sup>: calcd 566.0913, found 566.0915.

#### (3*R*,4*R*)-3-([1,1'-Biphenyl]-4-yl)-3-methyl-1-tosyl-4-vinyl-3,4-dihydroquinolin-2(1*H*)-one (3ai)

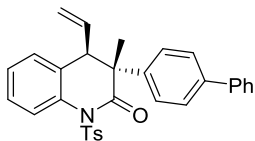

White solid, 75% yield;  $[\alpha]_D^{25} = 23.1$  ( $c = 1.00$  in CHCl<sub>3</sub>); ee = 99%, d.r. = 94:6, determined by HPLC analysis (Chiralpak OD column, hexane/*i*-PrOH, 90:10 v/v, flow rate 1 mL/min,  $\lambda = 254$  nm, 25 °C),  $t_R$  (major) = 26.65 min,  $t_R$  (minor) = 27.88 min; <sup>1</sup>H

NMR (400 MHz, CDCl<sub>3</sub>)  $\delta$  (ppm) 8.00 (d,  $J = 8.1$  Hz, 2H), 7.60 (d,  $J = 8.1$  Hz, 1H), 7.44 (d,  $J = 7.5$  Hz, 2H), 7.39 – 7.34 (m, 4H), 7.31 (d,  $J = 8.3$  Hz, 3H), 7.16 – 7.09 (m, 2H), 7.04 (t,  $J = 8.5$  Hz, 3H), 5.74 – 5.66 (m, 1H), 5.27 – 5.10 (m, 2H), 3.83 (d,  $J = 8.1$  Hz, 1H), 2.47 (s, 3H), 1.42 (s, 3H). <sup>13</sup>C NMR (100 MHz, CDCl<sub>3</sub>)  $\delta$  (ppm) 173.5, 145.0, 140.0, 140.0, 139.4, 136.4, 134.1, 134.0, 131.4, 129.3, 129.1, 128.6, 128.0, 127.3, 127.2, 127.0, 126.8, 126.2, 125.7, 123.2, 119.5, 53.1, 52.3, 24.7, 21.7. HRMS (ESI) for: C<sub>31</sub>H<sub>27</sub>NO<sub>3</sub>S [M+H]<sup>+</sup>: calcd 494.1784, found 494.1776.

#### (3*R*,4*R*)-3-Methyl-3-(naphthalen-2-yl)-1-tosyl-4-vinyl-3,4-dihydroquinolin-2(1*H*)-one (3aj)

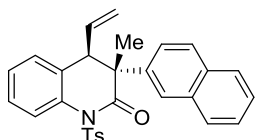

White solid, 75% yield;  $[\alpha]_D^{25} = 25.3$  ( $c = 1.00$  in CHCl<sub>3</sub>); ee = 98%, d.r. = 94:6, determined by HPLC analysis (Chiralpak IE column, hexane/*i*-PrOH, 90:10 v/v, flow rate 1 mL/min,  $\lambda = 254$  nm, 25 °C),  $t_R$  (major) = 33.51 min,  $t_R$  (minor) = 37.53 min; <sup>1</sup>H

NMR (400 MHz, CDCl<sub>3</sub>)  $\delta$  (ppm) 8.00 (d,  $J = 8.0$  Hz, 2H), 7.87 – 7.65 (m, 4H), 7.51 – 7.10 (m, 9H), 5.80 (s, 1H), 5.08 – 4.93 (m, 2H), 3.65 (s, 1H), 2.45 (s, 3H), 1.63 (s, 3H); <sup>13</sup>C NMR (100 MHz, CDCl<sub>3</sub>)  $\delta$  (ppm) 174.4, 144.9, 136.7, 135.8, 135.4, 135.2, 134.5, 131.7, 131.1, 129.4, 129.1, 129.0, 128.8, 127.9, 127.4, 127.2, 126.2,

126.2, 125.0, 124.8, 124.4, 122.3, 119.5, 54.4, 52.9, 26.4, 21.7; HRMS (ESI) for: C<sub>29</sub>H<sub>25</sub>NO<sub>3</sub>S [M+Na]<sup>+</sup>: calcd 490.1450, found 490.1447.

**(3R,4R)-3-(6-Methoxynaphthalen-2-yl)-3-methyl-1-tosyl-4-vinyl-3,4-dihydroquinolin-2(1H)-one (3ak)**

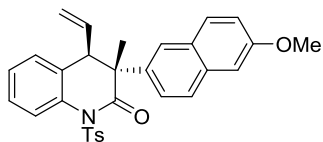

White solid, 71% yield;  $[\alpha]_D^{25} = 50.0$  ( $c = 1.00$  in CHCl<sub>3</sub>); ee = 98%, d.r.>95:5, determined by HPLC analysis (Chiralpak OD column, hexane/*i*-PrOH, 90:10 v/v, flow rate 1 mL/min,  $\lambda = 254$  nm, 25 °C),  $t_R$  (major) = 36.28 min,  $t_R$  (minor) = 32.00

min; <sup>1</sup>H NMR (400 MHz, CDCl<sub>3</sub>)  $\delta$  (ppm) 8.01 (d,  $J = 8.4$  Hz, 2H), 7.56 (dd,  $J = 8.1, 1.2$  Hz, 1H), 7.47 (dd,  $J = 8.8, 5.9$  Hz, 2H), 7.43 – 7.36 (m, 2H), 7.15 – 7.07 (m, 2H), 7.07 – 7.02 (m, 2H), 7.01–6.97 (m, 1H), 6.95 (d,  $J = 2.5$  Hz, 1H), 5.77 – 5.68 (m, 1H), 5.24 – 5.13 (m, 2H), 3.92 (d,  $J = 8.2$  Hz, 1H), 3.83 (s, 3H), 2.50 (s, 3H), 1.44 (s, 3H). <sup>13</sup>C NMR  $\delta$  (ppm) 173.7, 157.7, 145.0, 136.5, 135.9, 134.2, 134.1, 133.1, 131.4, 129.3, 129.2, 129.1, 128.4, 127.9, 127.2, 127.1, 126.1, 124.2, 123.7, 123.1, 119.5, 118.9, 105.2, 55.2, 53.3, 52.2, 24.6, 21.8. HRMS (ESI) for: C<sub>30</sub>H<sub>27</sub>NO<sub>4</sub>S [M+Na]<sup>+</sup>: calcd 520.1553, found 520.1561.

**(3R,4R)-3-(Benzo[d][1,3]dioxol-5-yl)-3-methyl-1-tosyl-4-vinyl-3,4-dihydroquinolin-2(1H)-one (3al)**

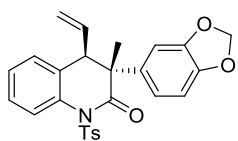

White solid, 57% yield;  $[\alpha]_D^{25} = 1.7$  ( $c = 1.00$  in CHCl<sub>3</sub>); ee>99%, d.r. = 95:5, determined by HPLC analysis (Chiralpak OD column, hexane/*i*-PrOH, 95:5 v/v, flow rate 1 mL/min,  $\lambda = 254$  nm, 25 °C),  $t_R$  (major) = 36.14 min; <sup>1</sup>H NMR (400 MHz, CDCl<sub>3</sub>)  $\delta$  (ppm) 7.98

(d,  $J = 8.0$  Hz, 2H), 7.60 (d,  $J = 8.2$  Hz, 1H), 7.37 (d,  $J = 8.0$  Hz, 2H), 7.21 – 7.14 (m, 1H), 7.08 (d,  $J = 4.5$  Hz, 2H), 6.58 – 6.44 (m, 2H), 6.44 – 6.36 (m, 1H), 5.83 (s, 2H), 5.62 (m, 1H), 5.26 – 5.02 (m, 2H), 3.70 (d,  $J = 8.2$  Hz, 1H), 2.48 (s, 3H), 1.34 (s, 3H). <sup>13</sup>C NMR (100 MHz, CDCl<sub>3</sub>)  $\delta$  (ppm)  $\delta$  173.5, 147.7, 146.2, 145.1, 136.4, 134.8, 134.1, 134.0, 131.4, 129.3, 129.1, 127.9, 127.2, 126.2, 123.2, 119.5, 118.8, 108.0, 105.9, 101.0, 53.0, 52.6, 24.8, 21.7. HRMS (ESI) for: C<sub>26</sub>H<sub>23</sub>NO<sub>5</sub>S [M+H]<sup>+</sup>: calcd 462.1370, found 462.1359.

**(3R,4R)-3-Methyl-1-tosyl-3-(1-tosyl-1H-indol-3-yl)-4-vinyl-3,4-dihydroquinolin-2(1H)-one (3am)**

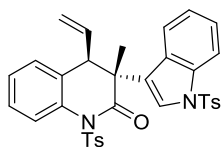

White solid, 56% yield;  $[\alpha]_D^{25} = 40.7$  ( $c = 1.00$  in CHCl<sub>3</sub>); ee>99%, d.r.>95:5, determined by HPLC analysis (Chiralpak OD column, hexane/*i*-PrOH, 95:5 v/v, flow rate 1 mL/min,  $\lambda = 254$  nm, 25 °C),  $t_R$  (major) = 70.98 min; <sup>1</sup>H NMR (400 MHz, CDCl<sub>3</sub>)  $\delta$  (ppm) 7.95 (d,

$J = 8.0$  Hz, 2H), 7.77 (d,  $J = 8.3$  Hz, 1H), 7.61 (d,  $J = 7.9$  Hz, 1H), 7.35 (t,  $J = 7.9$  Hz, 4H), 7.28 – 7.26 (m, 2H), 7.24 – 7.11 (m, 5H), 7.05 – 7.01 (m, 2H), 5.63 – 5.54 (m, 1H), 5.04 – 5.00 (m, 2H), 3.96 (d,  $J = 8.5$  Hz, 1H), 2.48 (s, 3H), 2.35 (s, 3H), 1.44 (s, 3H). <sup>13</sup>C NMR (100 MHz, CDCl<sub>3</sub>)  $\delta$  (ppm) 172.1, 145.1, 144.8, 136.3, 135.0, 134.9, 134.2, 133.0, 131.3, 129.8, 129.4, 129.2, 128.1, 127.7, 127.1, 126.6, 126.4, 124.6, 124.2, 123.2, 123.1,

121.4, 120.6, 120.0, 113.5, 50.8, 48.4, 21.7, 21.6, 20.9. HRMS (ESI) for: C<sub>34</sub>H<sub>30</sub>N<sub>2</sub>O<sub>5</sub>S<sub>2</sub> [M+Na]<sup>+</sup>: calcd 633.1488, found 633.1495.

**(R)-1'-Tosyl-4'-vinyl-1',4'-dihydro-2'H-spiro[cyclopentane-1,3'-quinolin]-2'-one (3an)**

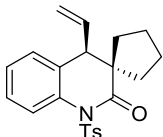

White solid, 64% yield;  $[\alpha]_D^{25} = -169.1$  ( $c = 1.00$  in CHCl<sub>3</sub>); ee>99%, determined by HPLC analysis (Chiralpak OD column, hexane/*i*-PrOH, 90:10 v/v, flow rate 1 mL/min,  $\lambda = 254$  nm, 25 °C),  $t_R$  (major) = 15.05 min; <sup>1</sup>H NMR (400 MHz, CDCl<sub>3</sub>)  $\delta$  (ppm) 7.92 (d,  $J = 8.1$  Hz, 2H), 7.73 (d,  $J = 8.2$  Hz, 1H), 7.37 – 7.29 (m, 3H), 7.24 – 7.14 (m, 2H), 5.64-5.56 (m, 1H), 5.09 – 4.98 (m, 2H), 3.11 (d,  $J = 7.3$  Hz, 1H), 2.45 (s, 3H), 2.14 (dd,  $J = 13.4, 6.7$  Hz, 1H), 1.81 – 1.70 (m, 1H), 1.56 (s, 6H), 1.43 (dd,  $J = 13.7, 7.4$  Hz, 1H), 1.25 (d,  $J = 6.3$  Hz, 1H). <sup>13</sup>C NMR (100 MHz, CDCl<sub>3</sub>)  $\delta$  (ppm) 175.2, 144.8, 136.5, 135.3, 134.6, 131.7, 129.1, 128.1, 127.2, 126.1, 123.3, 118.5, 55.0, 52.5, 36.1, 32.7, 25.7, 25.2, 21.7. HRMS (ESI) for: C<sub>22</sub>H<sub>23</sub>NO<sub>3</sub>S [M+Na]<sup>+</sup>: calcd 404.1291, found 404.1284.

**(R)-1'-Tosyl-4'-vinyl-1',4'-dihydro-2'H-spiro[cyclohexane-1,3'-quinolin]-2'-one (3ao)**

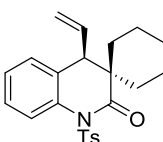

White solid, 74% yield;  $[\alpha]_D^{25} = -167.6$  ( $c = 1.00$  in CHCl<sub>3</sub>); ee>99%, determined by HPLC analysis (Chiralpak OD column, hexane/*i*-PrOH, 90:10 v/v, flow rate 1 mL/min,  $\lambda = 254$  nm, 25 °C),  $t_R$  (major) = 9.37 min,  $t_R$  (minor) = 8.70 min; <sup>1</sup>H NMR (400 MHz, CDCl<sub>3</sub>)  $\delta$  (ppm) 7.94 (d,  $J = 8.1$  Hz, 2H), 7.74 (d,  $J = 8.2$  Hz, 1H), 7.32 (d,  $J = 8.2$  Hz, 3H), 7.24 – 7.15 (m, 2H), 5.58-5.49 (m, 1H), 5.14 – 5.01 (m, 2H), 3.42 (d,  $J = 8.4$  Hz, 1H), 2.44 (s, 3H), 1.91-1.84 (m, 1H), 1.78 – 1.63 (m, 1H), 1.48 – 1.22 (m, 8H), 1.14 – 1.03 (m, 1H). <sup>13</sup>C NMR (100 MHz, CDCl<sub>3</sub>)  $\delta$  (ppm) 175.0, 144.8, 136.6, 134.6, 134.2, 130.7, 129.2, 129.0, 128.2, 127.3, 126.4, 123.1, 118.3, 49.0, 46.8, 31.0, 29.8, 25.4, 21.6, 21.0, 20.9. HRMS (ESI) for: C<sub>23</sub>H<sub>25</sub>NO<sub>3</sub>S [M+H]<sup>+</sup>: calcd 396.1628, found 396.1623.

**(3S,4R)-3-Benzyl-3-methyl-1-tosyl-4-vinyl-3,4-dihydroquinolin-2(1H)-one(3ap)**

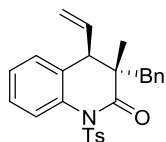

White solid, 77% yield;  $[\alpha]_D^{25} = -70.3$  ( $c = 0.40$  in CHCl<sub>3</sub>); ee>99%/>99%, d.r. = 69:31, determined by HPLC analysis (Chiralpak AD column, hexane/*i*-PrOH, 95:5 v/v, flow rate 1 mL/min,  $\lambda = 254$  nm, 25 °C), diastereomer A:  $t_R$  (major) = 22.05 min, diastereomer B:  $t_R$  (major) = 28.87 min; <sup>1</sup>H NMR (400 MHz, CDCl<sub>3</sub>)  $\delta$  (ppm) 1H NMR (400 MHz, CDCl<sub>3</sub>)  $\delta$  (ppm) 7.98 (d,  $J = 8.1$  Hz, 3H, major+minor), 7.83 (d,  $J = 8.2$  Hz, 1H, major), 7.73 (d,  $J = 8.2$  Hz, 1H, minor), 7.42-7.38 (m, 4H, minor), 7.34-7.28 (m, 4H, major), 7.21 (dd,  $J = 7.6, 1.7$  Hz, 4H, minor), 7.17 – 7.12 (m, 4H, major), 6.98 (s, 2H, major), 6.83 – 6.77 (m, 2H, minor), 5.90-5.81 (m, 1H, minor), 5.65-5.56 (m, 1H, major), 5.38 – 5.21 (m, 2H, minor), 5.10 – 4.96 (m, 2H, major), 3.25 (d,  $J = 8.5$  Hz, 1H, minor), 3.13 (d,  $J = 8.3$  Hz, 1H, major), 2.54 – 2.40 (m, 5H, major+minor), 1.06 (s, 3H, major), 0.86 (s, 1H, minor). <sup>13</sup>C NMR (100 MHz, CDCl<sub>3</sub>)  $\delta$  (ppm) 174.2,

144.9, 136.4, 135.3, 134.5, 134.3, 130.6, 130.3, 129.2, 129.1, 128.6, 127.9, 127.5, 126.7, 126.4, 123.0, 118.8, 50.6, 48.4, 41.4, 21.7, 20.0. HRMS (ESI) for: C<sub>26</sub>H<sub>25</sub>NO<sub>3</sub>S [M+H]<sup>+</sup>: calcd 432.1628, found 432.1640.

**(3R,4R)-3-ethyl-1-tosyl-4-vinyl-3,4-dihydroquinolin-2(1H)-one (3ar)**

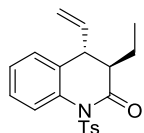

Colorless oil, 31% yield;  $[\alpha]_{\text{D}}^{25} = 121.40$  ( $c = 0.50$  in CHCl<sub>3</sub>); ee>99%, d.r. >20:1, determined by HPLC analysis (Chiralpak AD column, hexane/*i*-PrOH, 90:10 v/v, flow rate 1 mL/min,  $\lambda = 254$  nm, 25 °C), diastereomer A:  $t_{\text{R}}$  (major) = 19.90 min; <sup>1</sup>H NMR (400 MHz, CDCl<sub>3</sub>)  $\delta$  7.91 (d,  $J = 8.4$  Hz, 2H), 7.73 (dd,  $J = 8.2, 1.1$  Hz, 1H), 7.41 – 7.14 (m, 5H), 5.67 (ddd,  $J = 16.8, 10.3, 6.2$  Hz, 1H), 5.16 – 4.91 (m, 2H), 3.41 – 3.27 (m, 1H), 2.62 – 2.37 (m, 4H), 1.42–1.33 (m, 1H), 0.81 (t,  $J = 7.4$  Hz, 3H). <sup>13</sup>C NMR (100 MHz, CDCl<sub>3</sub>)  $\delta$  172.2, 145.0, 136.8, 136.3, 134.4, 129.9, 129.4, 129.1, 128.2, 127.4, 126.3, 123.5, 117.9, 50.3, 44.3, 22.0, 21.7, 10.9. HRMS (ESI) for: C<sub>20</sub>H<sub>21</sub>NO<sub>3</sub>S [M+Na]<sup>+</sup>: calcd 378.1134, found 378.1134.

**(4R)-3,3-dimethyl-1-tosyl-4-vinyl-1,2,3,4-tetrahydroquinolin-2-ol (4aq)**

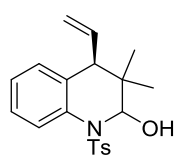

White solid, 91% yield,  $[\alpha]_{\text{D}}^{25} = -78.77$  ( $c = 1.0$  in CHCl<sub>3</sub>); ee>99%, d.r. =5:1, determined by HPLC analysis (Chiralpak AD column, hexane/*i*-PrOH, 90:10 v/v, flow rate 1 mL/min,  $\lambda = 254$  nm, 25 °C), diastereomer A:  $t_{\text{R}}$  (major) = 21.66 min,  $t_{\text{R}}$  (minor) = 13.61 min; <sup>1</sup>H NMR (400 MHz, Chloroform-*d*)  $\delta$  7.85 (d,  $J = 8.0$  Hz, 2H, major), 7.71 (d,  $J = 8.2$  Hz, 2H, minor), 7.53 (dd,  $J = 11.9, 8.3$  Hz, 1H, major+minor), 7.31 (d,  $J = 7.5$  Hz, 2H, major), 7.25 (d,  $J = 7.9$  Hz, 2H, minor), 7.18 (d,  $J = 7.7$  Hz, 1H), 7.13 (d,  $J = 7.6$  Hz, 1H), 7.01 (t,  $J = 7.4$  Hz, 1H), 5.98 – 5.78 (m, 1H, minor), 5.59 (s, 1H, major+minor), 5.55–5.46 (m, 1H, major), 5.30 – 5.13 (m, 2H, major+minor), 4.98 – 4.81 (m, 1H, minor), 3.40 (d,  $J = 9.3$  Hz, 1H), 2.44 (s, 3H, major+minor), 1.13 (s, 3H, major), 1.03 (s, 3H, minor), 0.94 (s, 3H, major), 0.74 (s, 3H, minor). <sup>13</sup>C NMR (101 MHz, CDCl<sub>3</sub>)  $\delta$  144.1, 135.7, 135.1, 129.9, 129.6, 129.4, 127.4, 127.0, 127.0, 123.2, 119.8, 118.9, 85.3, 48.40, 36.5, 24.3, 21.6, 21.2. HRMS (ESI) for: C<sub>20</sub>H<sub>23</sub>NO<sub>3</sub>S [M+Na]<sup>+</sup>: calcd 380.1291, found 380.1294.

**(R)-3,3-Dimethyl-1-tosyl-4-vinyl-3,4-dihydroquinolin-2(1H)-one (5a)**

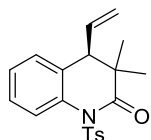

White solid, 88% yield;  $[\alpha]_{\text{D}}^{25} = -119.9$  ( $c = 1.00$  in CHCl<sub>3</sub>); ee>99%, determined by HPLC analysis (Chiralpak OD column, hexane/ *i*-PrOH, 90:10 v/v, flow rate 1 mL/min,  $\lambda = 254$  nm, 25 °C),  $t_{\text{R}}$  (major) = 13.92 min,  $t_{\text{R}}$  (minor) = 10.47 min; <sup>1</sup>H NMR (400 MHz, CDCl<sub>3</sub>)  $\delta$  (ppm) 7.97 (d,  $J = 8.4$  Hz, 2H), 7.69 (d,  $J = 8.2$  Hz, 1H), 7.36 – 7.31 (m, 3H), 7.28 – 7.14 (m, 2H), 5.73–5.64 (m, 1H), 5.25 – 5.07 (m, 2H), 3.12 (d,  $J = 8.6$  Hz, 1H), 2.45 (s, 3H), 1.03 (s, 3H), 0.94 (s, 3H); <sup>13</sup>C NMR (100 MHz, CDCl<sub>3</sub>)  $\delta$  (ppm) 175.5, 144.9, 136.6, 134.2, 134.1, 131.2, 129.3, 128.9, 127.7, 127.2, 126.3, 122.9, 119.3, 52.8, 44.1, 24.2, 21.7, 21.3. HRMS (ESI) for: C<sub>20</sub>H<sub>21</sub>NO<sub>3</sub>S [M+Na]<sup>+</sup>: calcd 378.1134, found 378.1134.

**(S)-1'-Tosyl-4'-vinyl-1',4'-dihydro-2'H-spiro[cyclohexane-1,3'-quinoline (5b)**

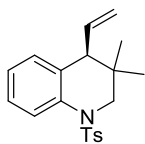

White solid, 87% yield;  $[\alpha]_{\text{D}}^{25} = -78.2$  ( $c = 1.00$  in  $\text{CHCl}_3$ );  $ee > 99\%$ , determined by HPLC analysis (Chiralpak AS column, hexane/*i*-PrOH, 90:10 v/v, flow rate 1 mL/min,  $\lambda = 254$  nm, 25 °C),  $t_{\text{R}}$  (major) = 13.10 min;  $^1\text{H NMR}$  (400 MHz,  $\text{CDCl}_3$ )  $\delta$  (ppm) 7.71 (s, 1H), 7.69 (s, 1H), 7.65 (d,  $J = 8.5$  Hz, 1H), 7.28 – 7.24 (m, 2H), 7.10 (t,  $J = 7.8$  Hz, 1H), 7.07 – 7.03 (m, 1H), 6.96 (t,  $J = 7.4$  Hz, 1H), 5.56 (dt,  $J = 17.1$  Hz, 9.5 Hz, 1H), 5.11 (dd,  $J = 10.0$  Hz, 1.9 Hz, 1H), 4.89 (dd,  $J = 17.0$  Hz, 1.9 Hz, 1H), 3.72 (d,  $J = 12.1$  Hz, 1H), 3.49 (d,  $J = 12.0$  Hz, 1H), 2.92 (d,  $J = 9.0$  Hz, 1H), 2.39 (s, 3H), 1.00 (s, 3H), 0.96 (s, 3H);  $^{13}\text{C NMR}$  (100 MHz,  $\text{CDCl}_3$ )  $\delta$  (ppm) 143.6, 137.6, 137.0, 135.8, 130.2, 129.6, 128.6, 126.9, 126.9, 123.2, 119.6, 118.3, 56.0, 53.6, 32.3, 26.4, 22.4, 21.5. HRMS (ESI) for:  $\text{C}_{20}\text{H}_{23}\text{NO}_2\text{S}$   $[\text{M}+\text{Na}]^+$ : calcd 364.1342, found 364.1342.

**(4S)-2-Allyl-3,3-dimethyl-1-tosyl-4-vinyl-1,2,3,4-tetrahydroquinoline (5c)**

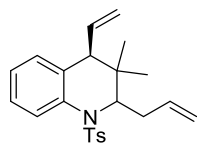

White solid, 91% yield;  $[\alpha]_{\text{D}}^{25} = -55.1$  ( $c = 1.00$  in  $\text{CHCl}_3$ ); d.r. = 72:27,  $ee > 99\%$ , determined by HPLC analysis (Chiralpak OD column, hexane/*i*-PrOH, 90:10 v/v, flow rate 1 mL/min,  $\lambda = 254$  nm, 25 °C), diastereomer A:  $t_{\text{R}}$  (major) = 7.68 min,  $t_{\text{R}}$  (minor) = 8.91 min; diastereomer B:  $t_{\text{R}}$  (major) = 6.72 min,  $t_{\text{R}}$  (minor) = 5.88 min;  $^1\text{H NMR}$  (400 MHz,  $\text{CDCl}_3$ )  $\delta$  (ppm) 7.85 (d,  $J = 8.4$  Hz, 2H, major+minor), 7.69 (dd,  $J = 8.3, 1.2$  Hz, 1H, major), 7.62 (dd,  $J = 8.0, 1.3$  Hz, 1H, minor), 7.32 (d,  $J = 8.1$  Hz, 2H, minor), 7.26 – 7.21 (m, 2H, major), 7.18-7.14 (m, 2H, major), 7.13 – 7.09 (m, 2H, minor), 7.00-6.96 (m, 1H, major), 6.88 (d,  $J = 7.6$  Hz, 1H, minor), 6.11 – 5.97 (m, 1H, minor), 5.97 – 5.82 (m, 1H, major), 5.78 – 5.67 (m, 1H, minor), 5.65 – 5.54 (m, 1H, major), 5.36 – 5.16 (m, 2H, major), 5.15 – 5.12 (m, 2H, minor), 5.11 – 5.06 (m, 2H, minor), 5.05 – 4.92 (m, 2H, minor), 4.51 – 4.38 (m, 1H, major), 3.96 (t,  $J = 6.6$  Hz, 1H, minor), 3.17 (d,  $J = 9.3$  Hz, 1H, major), 2.48-2.42 (m, 1H, major+minor), 2.38 (s, 4H, major+minor), 2.17 – 1.98 (m, 1H, major), 1.61 (d,  $J = 9.9$  Hz, 1H, minor), 1.07 (s, 3H, major), 0.91 (s, 3H, minor), 0.88 (s, 3H, major), 0.44 (s, 3H, minor).  $^{13}\text{C NMR}$  (100 MHz,  $\text{CDCl}_3$ )  $\delta$  (ppm) 143.4, 136.8, 135.8, 134.4, 130.1, 129.2, 128.1, 127.2, 126.8, 123.3, 120.6, 119.5, 117.5, 65.5, 50.2, 34.7, 33.5, 26.0, 23.9, 21.5. HRMS (ESI) for:  $\text{C}_{23}\text{H}_{27}\text{NO}_2\text{S}$   $[\text{M}+\text{Na}]^+$ : calcd 404.1655, found 404.1654.

**(4S)-3,3-Dimethyl-1-tosyl-4-vinyl-1,2,3,4-tetrahydroquinoline-2-carbonitrile (5d)**

White solid, 90% yield,  $[\alpha]_{\text{D}}^{25} = -62.6$  ( $c = 1.00$  in  $\text{CHCl}_3$ );  $ee > 99\%$ , determined by HPLC analysis (Chiralpak IF column, hexane/*i*-PrOH, 95:5 v/v, flow rate 1 mL/min,  $\lambda = 254$  nm, 25 °C),  $t_{\text{R}}$  (major) = 14.64 min;  $^1\text{H NMR}$

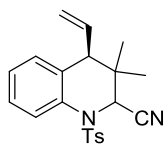

(400 MHz, CDCl<sub>3</sub>)  $\delta$  (ppm) 7.93 – 7.84 (m, 21H), 7.39 (d,  $J$  = 8.1 Hz, 2H), 7.28 – 7.17 (m, 2H), 7.06 (m, 2H), 5.68 – 5.54 (m, 1H), 5.44 (dd,  $J$  = 10.0 Hz, 1.9 Hz, 1H), 5.37 (s, 1H), 5.33 (dd,  $J$  = 16.9 Hz, 1.9 Hz, 1H), 3.50 (d,  $J$  = 9.2 Hz, 1H), 2.45 (s, 3H), 1.29 (s, 3H), 1.10 (s, 3H);

<sup>13</sup>C NMR (100 MHz, CDCl<sub>3</sub>)  $\delta$  (ppm) 144.6, 137.6, 135.1, 133.2, 130.4, 130.3, 127.3, 126.8, 126.4, 124.2, 121.3, 119.1, 116.6, 56.6, 50.5, 34.6, 25.0, 21.6, 19.9; HRMS (ESI) for: C<sub>21</sub>H<sub>22</sub>N<sub>2</sub>O<sub>2</sub>S [M+Na]<sup>+</sup>: calcd 389.1294, found 389.1294.

#### (4R)-2-Azido-3,3-dimethyl-1-tosyl-4-vinyl-1,2,3,4-tetrahydroquinoline (5e)

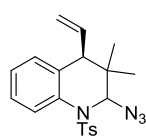

White solid, 84% yield, [ $\alpha$ ]<sub>D</sub><sup>25</sup> = -252.2 (c = 1.00 in CHCl<sub>3</sub>); ee>99%, determined by HPLC analysis (Chiralpak IC column, hexane/*i*-PrOH, 95:5 v/v, flow rate 1 mL/min,  $\lambda$  = 254 nm, 25 °C), t<sub>R</sub> (major) = 14.95 min; <sup>1</sup>H NMR (400 MHz, Acetone-*d*<sub>6</sub>)  $\delta$  (ppm) 7.98 (dd,  $J$  = 8.3, 1.6

Hz, 2H), 7.73 (d,  $J$  = 8.3 Hz, 1H, major), 7.69 (d,  $J$  = 8.1 Hz, 1H, minor), 7.56 (d,  $J$  = 8.3, 2H, minor), 7.47 (d,  $J$  = 8.0 Hz, 2H, major), 7.37 (d,  $J$  = 7.9 Hz, 2H, minor), 7.32 (t,  $J$  = 7.8 Hz, 2H, minor) 7.17 (t,  $J$  = 8.6 Hz, 2H, major), 7.02 (t,  $J$  = 7.5 Hz, 1H, major), 6.97 (d,  $J$  = 7.8 Hz, 1H, minor), 5.97 (s, 1H, major), 5.53 (s, 1H, minor), 5.86 (m, 1H, minor), 5.71 – 5.57 (m, 1H, major), 5.45 – 5.27 (m, 2H, major), 5.21 – 5.13 (m, 2H, minor), 4.83 – 4.72 (m, 2H, minor), 3.37 (d,  $J$  = 9.5 Hz, 1H), 2.42 (s, 3H), 1.18 (s, 3H, major), 0.97 (s, 3H, minor), 0.83 (s, 3H, major), 0.63 (s, 3H, minor). <sup>13</sup>C NMR (100 MHz, Acetone-*d*<sub>6</sub>)  $\delta$  (ppm) 144.9, 136.8, 135.7, 133.4, 129.9, 129.6, 127.8, 127.1, 126.9, 123.4, 120.3, 118.5, 80.0, 48.1, 35.8, 24.2, 20.6, 19.8. HRMS (ESI) for: C<sub>21</sub>H<sub>22</sub>N<sub>2</sub>O<sub>2</sub>S [M+Na]<sup>+</sup>: calcd 405.1356, found 405.1363.

#### (4R)-2-Ethoxy-3,3-dimethyl-1-tosyl-4-vinyl-1,2,3,4-tetrahydroquinoline(5f)

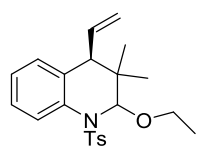

White solid, 77% yield, [ $\alpha$ ]<sub>D</sub><sup>25</sup> = -111.2 (c = 1.00 in CHCl<sub>3</sub>); ee>99%, d.r. = 80:20, determined by HPLC analysis (Chiralpak IE column\*2, hexane/*i*-PrOH, 95:5 v/v, flow rate 1 mL/min,  $\lambda$  = 254 nm, 25 °C), diastereomer A: t<sub>R</sub> (major) = 24.22 min; diastereomer B: t<sub>R</sub>

(major) = 26.40 min; <sup>1</sup>H NMR (400 MHz, CDCl<sub>3</sub>)  $\delta$  (ppm) 7.85 (d,  $J$  = 8.2 Hz, 2H, major), 7.81 (d,  $J$  = 8.3 Hz, 2H, minor), 7.68 – 7.64 (m, 1H, major), 7.50-7.46 (m, 1H, minor), 7.28 – 7.23 (m, 2H, major), 7.21 (d,  $J$  = 8.1 Hz, 2H, minor), 7.17 (dt,  $J$  = 7.7, 1.4 Hz, 1H, major+minor), 7.10-7.05 (m, 1H, major), 7.03 (s, 1H, minor), 6.97-6.93 (m, 1H, major), 6.04-6.95 (m, 1H, minor), 5.70 – 5.53 (m, 1H, major), 5.41 (s, 1H, major), 5.36 (dd,  $J$  = 10.1, 2.2 Hz, 1H, major), 5.31 (s, 1H, minor), 5.25 (dd,  $J$  = 17.0, 2.2 Hz, 1H, major), 4.97 (dd,  $J$  = 9.9, 2.2 Hz, 1H, minor), 4.85 (dd,  $J$  = 17.0, 2.2 Hz, 1H, minor), 3.96 – 3.78 (m, 1H, major+minor), 3.75 – 3.57 (m, 1H, major+minor), 3.49 (d,  $J$  = 9.8 Hz, 1H, major), 2.52 (d,  $J$  = 10.0 Hz, 1H, minor), 2.38 (s, 4H, major+minor), 1.17 (t,  $J$  = 7.0 Hz, 4H, major+minor), 1.13 (s, 3H, major), 0.92 (s, 1H, minor), 0.90 (s, 1H, minor), 0.76 (s, 3H,



major);  $^{13}\text{C}$  NMR (100 MHz,  $\text{CDCl}_3$ )  $\delta$  (ppm) 143.8, 136.9, 136.2, 133.6, 129.8, 129.4, 127.9, 127.8, 126.5, 122.9, 120.2, 119.0, 91.5, 64.7, 48.2, 35.5, 24.9, 21.5, 20.7, 14.9; HRMS (ESI) for:  $\text{C}_{22}\text{H}_{27}\text{NO}_3\text{S}$   $[\text{M}+\text{Na}]^+$ : calcd 408.1604, found 408.1604.

**(4R)-3,3-Dimethyl-2-(phenylthio)-1-tosyl-4-vinyl-1,2,3,4-tetrahydroquinoline (5g)**

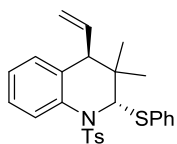

White solid, 77% yield,  $[\alpha]_{\text{D}}^{25} = -370.6$  ( $c = 1.00$  in  $\text{CHCl}_3$ );  $ee > 99\%$ ,  $d.r. > 95:5$ , determined by HPLC analysis (Chiralpak OD column, hexane/*i*-PrOH, 90:10 v/v, flow rate 1 mL/min,  $\lambda = 254$  nm,  $25^\circ\text{C}$ ),  $t_{\text{R}}$  (major) = 13.51 min;  $^1\text{H}$  NMR (400 MHz,  $\text{CDCl}_3$ )  $\delta$  (ppm) 7.72 (d,  $J = 8.1$ , 2H), 7.56 – 7.49 (m, 2H), 7.36 – 7.27 (m, 3H), 7.24 (d,  $J = 8.3$ , 2H), 7.17 (d,  $J = 8.1$ , 2H), 7.07-7.02 (m, 2H), 5.98 (s, 1H), 5.74 – 5.60 (m, 1H), 5.46 – 5.22 (m, 2H), 3.61 (d,  $J = 9.4$ , 1H), 2.37 (s, 3H), 1.25 (s, 3H), 1.06 (s, 3H);  $^{13}\text{C}$  NMR (100 MHz,  $\text{CDCl}_3$ )  $\delta$  (ppm) 143.6, 138.4, 136.2, 134.5, 134.0, 132.6, 130.2, 129.7, 129.2, 127.8, 127.6, 127.3, 126.9, 123.7, 120.4, 119.9, 76.4, 49.8, 37.7, 26.2, 22.3, 21.5; HRMS (ESI) for:  $\text{C}_{26}\text{H}_{27}\text{NO}_2\text{S}_2$   $[\text{M}+\text{Na}]^+$ : calcd 472.1375, found 472.1375.

**(4R)-2-(benzylthio)-3,3-dimethyl-1-tosyl-4-vinyl-1,2,3,4-tetrahydroquinoline (5h)**

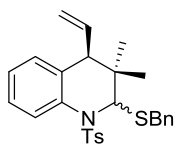

Colorless oil, 87% yield,  $d.r. = 6:1$ .  $^1\text{H}$  NMR (400 MHz,  $\text{CDCl}_3$ )  $\delta$  7.93 (d,  $J = 8.1$  Hz, 2H, major), 7.65 (d,  $J = 8.0$  Hz, 2H, minor), 7.55 – 7.39 (m, 1H), 7.34 (d,  $J = 7.3$  Hz, 2H), 7.31-7.22 (m, 6H, major+minor), 7.18 (d,  $J = 7.6$  Hz, 1H), 7.08 (t,  $J = 7.8$  Hz, 1H, major), 6.98 (t,  $J = 7.4$  Hz, 1H, minor). 5.81-5.74 (m, 1H, minor), 5.71 – 5.55 (m, 2H, major), 5.34 (dd,  $J = 10.0, 2.0$  Hz, 1H), 5.29 – 5.19 (m, 1H), 5.08 (d,  $J = 10.2$  Hz, 1H, minor), 4.56 (d,  $J = 16.9$  Hz, 1H, minor), 4.21 (d,  $J = 12.7$  Hz, 1H, minor), 4.00 (d,  $J = 12.8$  Hz, 1H, major), 3.90 (d,  $J = 12.8$  Hz, 1H, major), 3.40 (d,  $J = 9.3$  Hz, 1H), 2.41 (s, 3H), 1.92 (d,  $J = 9.7$  Hz, 1H, minor), 0.98 (s, 3H, major), 0.88 (s, 3H, major+minor), 0.63 (s, 3H, minor).  $^{13}\text{C}$  NMR (100 MHz,  $\text{CDCl}_3$ )  $\delta$  143.9, 137.9, 137.7, 136.2, 133.9, 130.2, 129.7, 129.3, 128.5, 127.5, 127.2, 126.9, 123.5, 120.3, 119.9, 119.1, 72.6, 50.0, 36.8, 36.7, 25.9, 22.5, 21.6. ATR-IR: 3147, 2359, 1651, 1400  $\text{cm}^{-1}$ .  $^1\text{H}$  HRMS (ESI) for:  $\text{C}_{27}\text{H}_{29}\text{NO}_2\text{S}_2$   $[\text{M}+\text{Na}]^+$ : calcd 486.1532, found 486.1534.

**(2S,4R)-2-(tert-butylthio)-3,3-dimethyl-1-tosyl-4-vinyl-1,2,3,4-tetrahydroquinoline (5i)**

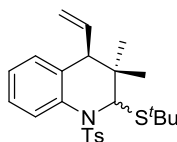

Colorless oil, 83% yield,  $d.r. > 19:1$ .  $^1\text{H}$  NMR (400 MHz,  $\text{CDCl}_3$ )  $\delta$  8.03 – 7.93 (m, 2H), 7.32 (d,  $J = 7.9$  Hz, 3H), 7.26 – 7.21 (m, 1H), 7.11-7.01 (m, 2H), 5.76 – 5.54 (m, 2H), 5.48 – 5.25 (m, 2H), 3.55 (d,  $J = 9.4$  Hz, 1H), 2.45 (s, 3H), 1.45 (s, 9H), 1.27 (s, 3H), 1.05 (s, 3H).  $^{13}\text{C}$  NMR (100 MHz,  $\text{CDCl}_3$ )  $\delta$  143.6, 138.4, 136.4, 134.4, 130.3, 129.5, 128.2, 127.3, 126.7, 123.7, 121.0, 120.2, 70.0, 49.7, 45.1, 37.2, 32.2, 26.4, 22.6, 21.6. ATR-IR: 3420, 3148, 1614, 1400  $\text{cm}^{-1}$ . HRMS (ESI) for:  $\text{C}_{24}\text{H}_{31}\text{NO}_2\text{S}_2$   $[\text{M}+\text{Na}]^+$ : calcd 452.1688, found 452.1682.

**(3R,4R)-3-methyl-3-phenyl-4-vinyl-3,4-dihydroquinolin-2(1H)-one (8aa)**

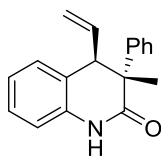

Colorless oil, 91% yield,  $[\alpha]_D^{25} = -71.43$  ( $c = 1.00$  in  $\text{CHCl}_3$ ); ee > 99%, d.r. > 95:5, determined by HPLC analysis (Chiralpak AD column, hexane/*i*-PrOH, 90:10 v/v, flow rate 0.4 mL/min,  $\lambda = 254$  nm, 25 °C).  $t_R$  (major) = 24.11 min.  $^1\text{H NMR}$  (400 MHz,  $\text{CDCl}_3$ )  $\delta$  (ppm) 8.67 (s, 1H), 7.35 – 7.29 (m, 2H), 7.18 (t,  $J = 7.6$  Hz, 2H), 7.14 – 7.03 (m, 3H), 6.91 (m, 1H), 6.69 (d,  $J = 7.8$  Hz, 1H), 5.93 (m, 1H), 5.21 – 4.99 (m, 2H), 3.94 (d,  $J = 8.8$  Hz, 1H), 1.54 (s, 3H);  $^{13}\text{C NMR}$  (100 MHz,  $\text{CDCl}_3$ )  $\delta$  (ppm) 174.1, 142.2, 135.7, 135.4, 128.3, 128.1, 127.6, 126.8, 126.5, 126.1, 123.4, 117.8, 115.2, 52.7, 49.5, 23.6; HRMS (ESI) for:  $\text{C}_{18}\text{H}_{17}\text{NO}$   $[\text{M}+\text{H}]^+$ : calcd 264.1378, found 264.1383.

**4-Phenyl-1-((2R,4R)-1-tosyl-4-vinyl-1,2,3,4-tetrahydroquinolin-2-yl)butan-2-one ((R,R)-7a)**

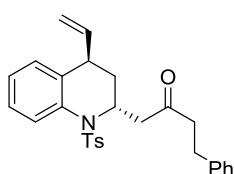

Colorless oil, 84% yield,  $[\alpha]_D^{25} = -58.10$  ( $c = 1.00$  in  $\text{CHCl}_3$ ); ee > 99%, d.r. > 95:5, determined by HPLC analysis (Chiralpak AD column, hexane/*i*-PrOH, 90:10 v/v, flow rate 1 mL/min,  $\lambda = 254$  nm, 25 °C),  $t_R$  (major) = 14.25 min;  $^1\text{H NMR}$  (400 MHz,  $\text{CDCl}_3$ )  $\delta$  7.80 (d,  $J = 8.2$  Hz, 1H), 7.41 – 7.36 (m, 2H), 7.30 – 7.23 (m, 3H), 7.21 – 7.07 (m, 7H), 4.99 – 4.79 (m, 4H), 3.22 – 3.09 (m, 1H), 2.89 (t,  $J = 7.6$  Hz, 2H), 2.76-2.71 (m, 3H), 2.47-2.39 (m, 1H), 2.37 (s, 3H), 1.64-1.57 (m, 1H), 1.32-1.24 (m, 1H).  $^{13}\text{C NMR}$  (100 MHz,  $\text{CDCl}_3$ )  $\delta$  206.1, 142.7, 139.8, 138.9, 135.2, 133.2, 129.9, 128.5, 128.4, 127.5, 127.3, 126.5, 126.2, 126.0, 125.1, 124.7, 115.2, 49.7, 45.0, 43.6, 37.1, 29.4, 28.6, 20.5; HRMS (ESI) for:  $\text{C}_{28}\text{H}_{29}\text{NO}_3\text{S}$   $[\text{M}+\text{H}]^+$ : calcd 460.1941, found 460.1937.

**4-Phenyl-1-((2R,4S)-1-tosyl-4-vinyl-1,2,3,4-tetrahydroquinolin-2-yl)butan-2-one ((R,S)-7a)**

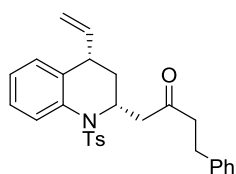

Colorless oil, 81% yield,  $[\alpha]_D^{25} = 43.93$  ( $c = 1.00$  in  $\text{CHCl}_3$ ); ee > 99%, d.r. > 95:5, determined by HPLC analysis (Chiralpak AD column, hexane/*i*-PrOH, 90:10 v/v, flow rate 1 mL/min,  $\lambda = 254$  nm, 25 °C),  $t_R$  (major) = 12.01 min;  $^1\text{H NMR}$  (400 MHz,  $\text{CDCl}_3$ )  $\delta$  7.65 (dd,  $J = 8.0, 1.3$  Hz, 1H), 7.32 – 7.24 (m, 6H), 7.18-7.16 (m, 5H), 6.97-6.94 (m, 1H), 5.62-5.53 (m, 1H), 5.08 (dd,  $J = 10.1, 1.7$  Hz, 1H), 4.77 – 4.67 (m, 1H), 4.53-4.46 (m, 1H), 3.14 (dd,  $J = 16.9, 3.7$  Hz, 1H), 2.96 – 2.60 (m, 5H), 2.39 (s, 3H), 2.26-2.20 (m, 1H), 1.85 – 1.75 (m, 1H), 1.14-1.04 (m, 1H).  $^{13}\text{C NMR}$  (100 MHz,  $\text{CDCl}_3$ )  $\delta$  207.8, 143.7, 140.8, 138.6, 137.4, 135.2, 134.7, 129.5, 128.5, 128.3, 127.2, 127.1, 126.4, 126.2, 125.0, 117.3, 53.0, 51.4, 45.0, 39.9, 37.9, 29.6, 21.5; HRMS (ESI) for:  $\text{C}_{28}\text{H}_{29}\text{NO}_3\text{S}$   $[\text{M}+\text{H}]^+$ : calcd 460.1941, found 472.1942.

#### 4-Phenyl-1-((2*S*,4*R*)-1-tosyl-4-vinyl-1,2,3,4-tetrahydroquinolin-2-yl)butan-2-one ((*S*,*R*)-7a)

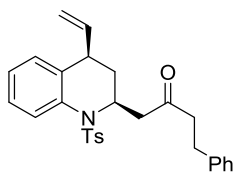

Colorless oil, 80% yield,  $[\alpha]_{\text{D}}^{25} = -42.20$  ( $c = 1.00$  in  $\text{CHCl}_3$ ); ee > 99%, d.r. > 95:5, determined by HPLC analysis (Chiralpak AD column, hexane/*i*-PrOH, 90:10 v/v, flow rate 1 mL/min,  $\lambda = 254$  nm, 25 °C),  $t_{\text{R}}$  (major) = 14.25 min; HRMS (ESI) for:  $\text{C}_{28}\text{H}_{29}\text{NO}_3\text{S}$   $[\text{M}+\text{H}]^+$ : calcd 460.1941, found 460.1939.

#### 4-Phenyl-1-((2*S*,4*S*)-1-tosyl-4-vinyl-1,2,3,4-tetrahydroquinolin-2-yl)butan-2-one ((*S*,*S*)-7a)

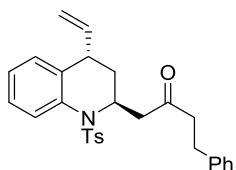

Colorless oil, 86% yield,  $[\alpha]_{\text{D}}^{25} = 56.32$  ( $c = 1.00$  in  $\text{CHCl}_3$ ); ee > 99%, d.r. > 95:5, determined by HPLC analysis (Chiralpak AD column, hexane/*i*-PrOH, 90:10 v/v, flow rate 1 mL/min,  $\lambda = 254$  nm, 25 °C),  $t_{\text{R}}$  (major) = 14.25 min; HRMS (ESI) for:  $\text{C}_{28}\text{H}_{29}\text{NO}_3\text{S}$   $[\text{M}+\text{H}]^+$ : calcd 460.1941, found 460.1943.

#### 1-((2*R*,4*R*)-7-Methyl-1-tosyl-4-vinyl-1,2,3,4-tetrahydroquinolin-2-yl)-4-phenylbutan-2-one ((*R*,*R*)-7b)

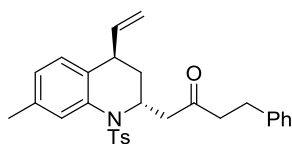

Colorless oil, 57% yield,  $[\alpha]_{\text{D}}^{25} = -120.80$  ( $c = 1.00$  in  $\text{CHCl}_3$ ); ee > 99%, d.r. = 13:1, determined by HPLC analysis (Chiralpak AD column, hexane/*i*-PrOH, 95:5 v/v, flow rate 1 mL/min,  $\lambda = 254$  nm, 25 °C),  $t_{\text{R}}$  (major) = 22.45 min;  $^1\text{H NMR}$  (400 MHz,  $\text{CDCl}_3$ )  $\delta$  7.65 (s, 1H), 7.42 (d,  $J = 8.3$  Hz, 2H), 7.29 (dd,  $J = 8.3, 6.4$  Hz, 3H), 7.23 – 7.16 (m, 4H), 7.03 – 6.97 (m, 2H), 5.00 – 4.81 (m, 4H), 3.17–3.11 (m, 1H), 2.93–2.89 (m, 2H), 2.79 – 2.67 (m, 3H), 2.48–2.42 (m, 1H), 2.40 (s, 3H), 2.38 (s, 3H), 1.64–1.58 (m, 1H), 1.30 – 1.23 (m, 1H).  $^{13}\text{C NMR}$  (100 MHz,  $\text{CDCl}_3$ )  $\delta$  207.2, 143.7, 140.8, 140.2, 137.0, 136.3, 133.9, 129.5, 129.27, 128.5, 128.3, 127.8, 127.5, 127.4, 126.8, 126.1, 115.9, 50.8, 45.9, 44.7, 37.8, 30.3, 29.6, 21.5, 21.3; HRMS (ESI) for:  $\text{C}_{29}\text{H}_{31}\text{NO}_3\text{S}$   $[\text{M}+\text{Na}]^+$ : calcd 516.1371, found 516.1369.

#### 1-((2*R*,4*S*)-7-Methyl-1-tosyl-4-vinyl-1,2,3,4-tetrahydroquinolin-2-yl)-4-phenylbutan-2-one ((*R*,*S*)-7b)

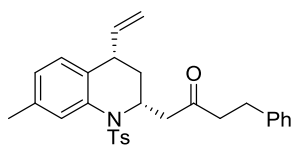

Colorless oil, 53% yield,  $[\alpha]_{\text{D}}^{25} = -16.13$  ( $c = 1.00$  in  $\text{CHCl}_3$ ); ee > 99%, d.r. > 95:5, determined by HPLC analysis (Chiralpak AD column, hexane/*i*-PrOH, 95:15 v/v, flow rate 1 mL/min,  $\lambda = 254$  nm, 25 °C),  $t_{\text{R}}$  (major) = 16.95 min;  $^1\text{H NMR}$  (400 MHz,  $\text{CDCl}_3$ )  $\delta$  7.40 (d,  $J = 1.8$  Hz, 1H), 7.25 – 7.21 (m, 2H), 7.20 – 7.17 (m, 3H), 7.13–7.09 (m, 4H), 6.93 – 6.88 (m, 1H), 6.78 – 6.74 (m, 1H), 5.53–5.44 (m, 1H), 4.99 (dd,  $J = 10.1, 1.8$  Hz, 1H), 4.65–4.60 (m, 1H), 4.42–4.39 (m, 1H), 3.05 (dd,  $J = 16.8, 3.7$  Hz, 1H), 2.86 – 2.75 (m, 2H), 2.72 – 2.50 (m, 3H), 2.32 (s, 3H), 2.31 (s, 3H), 2.15–2.09 (m, 1H), 1.71–1.67 (m, 1H), 1.04 – 0.91 (m, 1H).  $^{13}\text{C NMR}$  (100 MHz,  $\text{CDCl}_3$ )  $\delta$  206.7, 142.6, 139.8, 136.6, 135.9, 134.5, 134.2, 133.4, 128.4, 128.1, 127.5, 127.3, 126.1, 126.0, 125.1, 123.7, 116.0, 51.9,

50.4, 43.9, 38.5, 36.9, 28.6, 20.5, 20.2; HRMS (ESI) for: C<sub>29</sub>H<sub>31</sub>NO<sub>3</sub>S [M+Na]<sup>+</sup>: calcd 516.1371, found 516.1371..

**1-((2*R*,4*R*)-7-Fluoro-1-tosyl-4-vinyl-1,2,3,4-tetrahydroquinolin-2-yl)-4-phenylbutan-2-one ((*R,R*)-7c)**

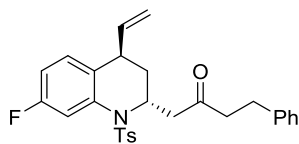

Colorless oil, 63% yield,  $[\alpha]_D^{25} = -53.93$  ( $c = 1.00$  in CHCl<sub>3</sub>); ee>99%, d.r.>95:5, determined by HPLC analysis (Chiralpak IF column, hexane/*i*-PrOH, 90:10 v/v, flow rate 1 mL/min,  $\lambda = 254$  nm, 25 °C),  $t_R$  (major) = 17.96 min; <sup>1</sup>H NMR (400 MHz, CDCl<sub>3</sub>)  $\delta$  7.60 (dd,  $J = 10.9, 2.6$  Hz, 1H), 7.44 (d,  $J = 8.1$  Hz, 2H), 7.27 (d,  $J = 3.5$  Hz, 2H), 7.19 (dd,  $J = 20.3, 7.6$  Hz, 5H), 7.09 – 7.03 (m, 1H), 6.86 (td,  $J = 8.2, 2.6$  Hz, 1H), 4.99 – 4.82 (m, 4H), 3.09 (s, 1H), 2.89 (t,  $J = 7.6$  Hz, 2H), 2.72 (dd,  $J = 15.3, 7.0$  Hz, 3H), 2.45 (dd,  $J = 16.6, 8.1$  Hz, 1H), 2.39 (s, 3H), 1.71 – 1.56 (m, 3H), 1.28 – 1.11 (m, 2H). <sup>13</sup>C NMR (100 MHz, CDCl<sub>3</sub>)  $\delta$  206.9, 161.2 (d,  $J = 244$  Hz), 160.0, 144.1, 140.7, 139.8, 135.9, 135.4, 130.7, 130.7 (d,  $J = 9$  Hz), 129.6, 128.5, 128.3, 127.5, 126.3 (d,  $J = 3$  Hz), 126.2, 116.4, 113.3 (d,  $J = 25$  Hz), 112.9 (d,  $J = 22$  Hz), 50.7, 46.0, 44.7, 37.7, 30.3, 29.6, 21.5. <sup>19</sup>F NMR (377 MHz, CDCl<sub>3</sub>)  $\delta$  (ppm) -113.6; HRMS (ESI) for: C<sub>28</sub>H<sub>28</sub>FNO<sub>3</sub>S [M+Na]<sup>+</sup>: calcd 500.1666, found 500.1666.

**1-((2*R*,4*S*)-7-Fluoro-1-tosyl-4-vinyl-1,2,3,4-tetrahydroquinolin-2-yl)-4-phenylbutan-2-one ((*R,S*)-7c)**

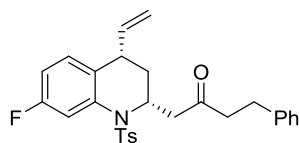

Colorless oil, 45% yield,  $[\alpha]_D^{25} = 6.77$  ( $c = 1.00$  in CHCl<sub>3</sub>); ee>99%, d.r.>95:5, determined by HPLC analysis (Chiralpak IF column, hexane/*i*-PrOH, 90:10 v/v, flow rate 1 mL/min,  $\lambda = 254$  nm, 25 °C),  $t_R$  (major) = 18.23 min; <sup>1</sup>H NMR (400 MHz, CDCl<sub>3</sub>)  $\delta$  7.45 (dd,  $J = 10.0, 2.5$  Hz, 1H), 7.36 (d,  $J = 8.3$  Hz, 2H), 7.32 – 7.27 (m, 2H), 7.23-7.18 (m, 5H), 6.98 – 6.85 (m, 2H), 5.62-5.53 (m, 1H), 5.12 (dd,  $J = 10.2, 1.6$  Hz, 1H), 4.80 – 4.73 (m, 1H), 4.58 – 4.43 (m, 1H), 3.17 (dd,  $J = 17.1, 3.5$  Hz, 1H), 2.99 – 2.62 (m, 5H), 2.42 (s, 3H), 2.27-2.21 (m, 1H), 1.86-1.80 (m, 1H), 1.16-1.07 (m, 1H). <sup>13</sup>C NMR (100 MHz, CDCl<sub>3</sub>)  $\delta$  207.6, 161.4 (d,  $J = 243$  Hz), 144.0, 140.8, 137.2, 136.0 (d,  $J = 11$  Hz), 135.01, 133.9 (d,  $J = 3$  Hz), 129.5, 128.5, 128.3, 127.1, 126.2, 126.0 (d,  $J = 7$  Hz), 117.5, 115.6 (d,  $J = 24$  Hz), 113.0 (d,  $J = 21$  Hz), 53.0, 51.2, 44.9, 39.4, 37.7, 29.6, 21.5. <sup>19</sup>F NMR (377 MHz, CDCl<sub>3</sub>)  $\delta$  (ppm) -114.4; HRMS (ESI) for: C<sub>28</sub>H<sub>28</sub>FNO<sub>3</sub>S [M+Na]<sup>+</sup>: calcd 500.1666, found 500.1666.

**1-((2*R*,4*R*)-7-Bromo-1-tosyl-4-vinyl-1,2,3,4-tetrahydroquinolin-2-yl)-4-phenylbutan-2-one ((*R,R*)-7d)**

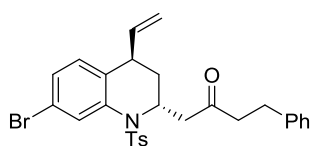

Colorless oil, 81% yield,  $[\alpha]_D^{25} = -84.93$  ( $c = 1.00$  in CHCl<sub>3</sub>); ee>99%, d.r.>95:5, determined by HPLC analysis (Chiralpak IF column, hexane/*i*-PrOH, 90:10 v/v, flow rate 1 mL/min,  $\lambda = 254$  nm, 25 °C),  $t_R$  (major) = 18.03 min; <sup>1</sup>H NMR (400

MHz, CDCl<sub>3</sub>)  $\delta$  7.92 (d,  $J = 2.0$  Hz, 1H), 7.36 (d,  $J = 8.4$  Hz, 2H), 7.21-7.17 (m, 3H), 7.15 – 7.07 (m, 5H), 6.90 (dd,  $J = 8.4, 0.9$  Hz, 1H), 4.88 – 4.82 (m, 3H), 4.80-4.74 (m, 1H), 2.99 (dd,  $J = 6.8, 4.0$  Hz, 1H), 2.88 – 2.76 (m,

2H), 2.66 – 2.60 (m, 3H), 2.36 (dd,  $J = 8.9, 7.7$  Hz, 1H), 2.31 (s, 3H), 1.57-1.51 (m, 1H), 1.21 – 1.08 (m, 1H).  $^{13}\text{C}$  NMR (100 MHz,  $\text{CDCl}_3$ )  $\delta$  206.9, 144.1, 140.7, 139.4, 135.8, 135.6, 130.9, 129.8, 129.7, 129.3, 128.7, 128.6, 128.3, 127.5, 126.2, 120.5, 116.7, 50.6, 45.9, 44.7, 37.8, 30.2, 29.6, 21.6; HRMS (ESI) for:  $\text{C}_{28}\text{H}_{28}\text{BrNO}_3\text{S}$   $[\text{M}+\text{Na}]^+$ : calcd 560.0865, found 560.0857.

**1-((2*R*,4*S*)-7-Bromo-1-tosyl-4-vinyl-1,2,3,4-tetrahydroquinolin-2-yl)-4-phenylbutan-2-one ((*R,S*)-7d)**

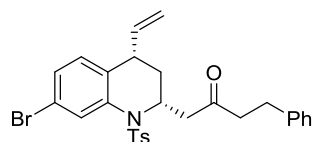

Colorless oil, 74% yield,  $[\alpha]_{\text{D}}^{25} = -34.60$  ( $c = 1.00$  in  $\text{CHCl}_3$ ); ee > 99%, d.r. > 95:5, determined by HPLC analysis (Chiralpak IF column, hexane/*i*-PrOH, 90:10 v/v, flow rate 1 mL/min,  $\lambda = 254$  nm, 25 °C),  $t_{\text{R}}$  (major) = 17.09 min;  $^1\text{H}$  NMR (400 MHz,  $\text{CDCl}_3$ )  $\delta$  7.82 (d,  $J = 2.1$  Hz, 1H), 7.33 (d, 2H), 7.31 – 7.24 (m, 4H), 7.23 – 7.12 (m, 5H), 6.83 (d,  $J = 8.2$  Hz, 1H), 5.57-5.48 (m, 1H), 5.10 (dd,  $J = 10.1, 1.6$  Hz, 1H), 4.72 (d,  $J = 17.1$  Hz, 1H), 4.45 (dd,  $J = 13.5, 6.7$  Hz, 1H), 3.14 (dd,  $J = 17.1, 3.5$  Hz, 1H), 2.99 – 2.57 (m, 5H), 2.40 (s, 3H), 2.25-2.19 (m, 1H), 1.83 – 1.69 (m, 1H), 1.21 – 0.94 (m, 1H).  $^{13}\text{C}$  NMR (100 MHz,  $\text{CDCl}_3$ )  $\delta$  207.5, 144.0, 140.7, 137.4, 136.8, 136.1, 135.0, 131.1, 129.6, 129.3, 128.5, 128.3, 127.2, 126.4, 126.2, 120.2, 117.8, 53.02, 51.2, 44.9, 39.6, 37.6, 29.6, 21.5; HRMS (ESI) for:  $\text{C}_{28}\text{H}_{28}\text{BrNO}_3\text{S}$   $[\text{M}+\text{Na}]^+$ : calcd 560.0865, found 560.0860.

**1-((2*R*,4*R*)-6-Chloro-1-tosyl-4-vinyl-1,2,3,4-tetrahydroquinolin-2-yl)-4-phenylbutan-2-one ((*R,R*)-7e)**

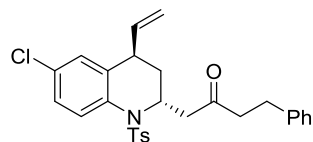

Colorless oil, 66% yield,  $[\alpha]_{\text{D}}^{25} = -81.87$  ( $c = 1.00$  in  $\text{CHCl}_3$ ); ee > 99%, d.r. = 9:1, determined by HPLC analysis (Chiralpak AD column, hexane/*i*-PrOH, 90:10 v/v, flow rate 1 mL/min,  $\lambda = 254$  nm, 25 °C),  $t_{\text{R}}$  (major) = 12.76 min;  $^1\text{H}$  NMR (400 MHz,  $\text{CDCl}_3$ )  $\delta$  7.75 (d,  $J = 8.8$  Hz, 1H), 7.39 (d,  $J = 8.3$  Hz, 2H), 7.30 – 7.23 (m, 2H), 7.23 – 7.13 (m, 6H), 7.08 (dd,  $J = 2.5, 0.9$  Hz, 1H), 5.01 – 4.88 (m, 3H), 4.88 – 4.79 (m, 1H), 3.09 (dt,  $J = 11.0, 7.1$  Hz, 1H), 2.88 (t,  $J = 7.2$  Hz, 2H), 2.80 – 2.64 (m, 3H), 2.45 – 2.40 (m, 1H), 2.39 (s, 3H), 1.62 – 1.53 (m, 1H), 1.26 – 1.15 (m, 1H).  $^{13}\text{C}$  NMR (100 MHz,  $\text{CDCl}_3$ )  $\delta$  206.9, 144.1, 140.7, 139.1, 135.8, 132.9, 132.6, 131.3, 129.7, 129.3, 128.5, 128.3, 128.3, 127.5, 127.5, 126.2, 117.0, 50.6, 45.9, 44.6, 38.1, 29.9, 29.6, 21.6; HRMS (ESI) for:  $\text{C}_{28}\text{H}_{28}\text{ClNO}_3\text{S}$   $[\text{M}+\text{Na}]^+$ : calcd 516.1371, found 516.1369.

**1-((2*R*,4*S*)-6-Chloro-1-tosyl-4-vinyl-1,2,3,4-tetrahydroquinolin-2-yl)-4-phenylbutan-2-one ((*R,S*)-7e)**

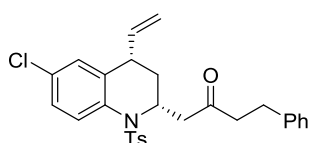

Colorless oil, 59% yield,  $[\alpha]_{\text{D}}^{25} = -4.93$  ( $c = 1.00$  in  $\text{CHCl}_3$ ); ee > 99%, d.r. > 95:5, determined by HPLC analysis (Chiralpak AD column, hexane/*i*-PrOH, 90:10 v/v, flow rate 1 mL/min,  $\lambda = 254$  nm, 25 °C),  $t_{\text{R}}$  (major) = 10.89 min;  $^1\text{H}$  NMR (400 MHz,  $\text{CDCl}_3$ )  $\delta$  7.57 (d,  $J = 8.5$  Hz, 1H), 7.35 – 7.28 (m, 3H), 7.27 – 7.10 (m, 7H), 6.94 (dd,  $J = 2.5, 1.1$  Hz, 1H), 5.57-5.48 (m, 1H), 5.12 (dd,  $J = 10.1, 1.6$  Hz, 1H), 4.72 (dt,  $J = 17.0, 1.2$  Hz, 1H), 4.52 – 4.38 (m, 1H),

3.13 (dd,  $J = 17.0, 3.5$  Hz, 1H), 2.96 – 2.81 (m, 2H), 2.80 – 2.61 (m, 3H), 2.41 (s, 3H), 2.25-2.19 (m, 1H), 1.78-1.72 (m, 1H), 1.17 – 0.98 (m, 1H).  $^{13}\text{C}$  NMR (100 MHz,  $\text{CDCl}_3$ )  $\delta$  207.6, 144.0, 140.8, 140.4, 136.4, 134.9, 133.4, 132.1, 129.7, 129.6, 128.5, 128.3, 127.3, 127.1, 126.2, 125.2, 118.1, 53.0, 51.2, 44.9, 39.9, 37.6, 29.6, 21.5; HRMS (ESI) for:  $\text{C}_{28}\text{H}_{28}\text{ClNO}_3\text{S}$   $[\text{M}+\text{Na}]^+$ : calcd 516.1371, found 516.1371.

**(*R*)-4-Phenyl-1-((2*R*,4*S*)-1-tosyl-4-vinyl-1,2,3,4-tetrahydroquinolin-2-yl)butan-2-yl 4-nitrobenzoate**  
**(*R,S*)-8a**

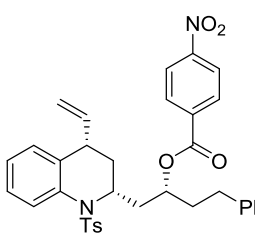 White solid, 73% yield,  $[\alpha]_{\text{D}}^{25} = 46.17$  ( $c = 1.00$  in  $\text{CHCl}_3$ ).  $^1\text{H}$  NMR (400 MHz,  $\text{CDCl}_3$ )  $\delta$  8.33 (d,  $J = 8.5$  Hz, 2H), 8.24 (d,  $J = 8.5$  Hz, 2H), 7.68 (d,  $J = 8.0$  Hz, 1H), 7.34 – 7.22 (m, 4H), 7.19 – 7.11 (m, 5H), 7.08 (d,  $J = 8.0$  Hz, 2H), 6.94 (d,  $J = 7.6$  Hz, 1H), 5.59 (dt,  $J = 18.0, 9.4$  Hz, 1H), 5.34-5.28 (m, 1H), 5.09 (d,  $J = 10.2$  Hz, 1H), 4.68 (d,  $J = 17.0$  Hz, 1H), 4.34 – 4.20 (m, 1H), 2.73 (dt,  $J = 9.6, 4.5$  Hz, 2H), 2.47-2.40 (m, 1H), 2.35 (s, 3H), 2.22 – 2.04 (m, 3H), 1.91-1.84 (m, 1H), 1.81 – 1.68 (m, 1H), 1.24 (td,  $J = 12.4, 9.5$  Hz, 1H).  $^{13}\text{C}$  NMR (100 MHz,  $\text{CDCl}_3$ )  $\delta$  164.4, 150.6, 143.6, 141.1, 138.4, 137.4, 135.7, 135.6, 134.6, 130.8, 129.4, 128.9, 128.5, 128.3, 127.3, 126.9, 126.5, 126.1, 125.0, 123.6, 117.4, 73.5, 53.3, 42.7, 39.6, 37.8, 36.0, 31.7, 21.4. HRMS (ESI) for:  $\text{C}_{28}\text{H}_{28}\text{ClNO}_3\text{S}$   $[\text{M}+\text{K}]^+$ : calcd 649.1769, found 649.1764.

## Supplementary Note 1

### Determination of the Absolute Configurations of Products

The absolute configuration of products **3** were determined to be (*3R,4R*) by comparing with the chiral HPLC spectra of our previous work (*J. Am. Chem. Soc.* **2017**, *139*, 14707–14713). The absolute configuration of chiral product **5g** was determined to be (*2S,4R*) through the X-ray single crystal diffraction analysis (**CCDC 1821791**).

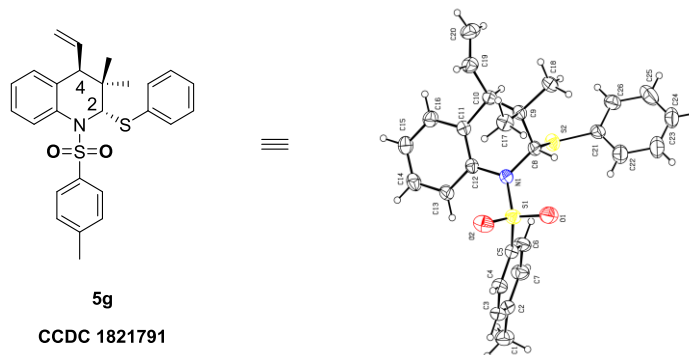

Given the fact that product **7a** is an oil at room temperature, it was converted to a solid product **8a** through a two-step operation. The absolute configuration of **8a** was established through the X-ray single crystal diffraction analysis (**CCDC 1869868**) and thus the structure of compound **7a** was

determined to be (2*R*,4*S*). The configurations of other stereoisomers were proposed based on this result together with the chiral HPLC and previous literatures (Carreira, E. M. *Science* **2013**, *340*, 1065-1068; *J. Am. Chem. Soc.* **2014**, *136*, 3020-3023).

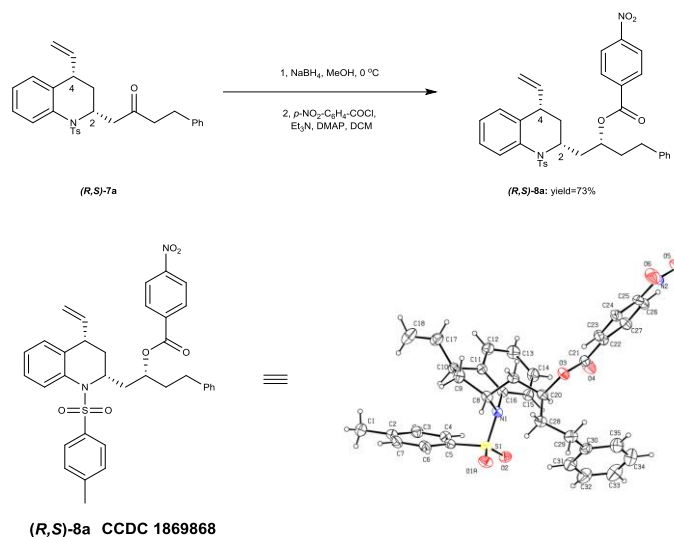

**Supplementary procedure N for the synthesis of 8a:** To a suspension of NaBH<sub>4</sub> (82 mg, 0.18 mmol) in methanol (10 mL) was added (R,S)-7a (82 mg, 0.18 mmol) at 0 °C, the mixture was stirred for 20 min. Then the reaction mixture was quenched with saturated aq. NH<sub>4</sub>Cl (10 mL). The aqueous layer was extracted with DCM and the organic phase was dried over Na<sub>2</sub>SO<sub>4</sub>, filtered and concentrated *in vacuo*. The crude residue was used directly for the next step. The crude alcohol was dissolved in 4 mL DCM, Et<sub>3</sub>N (3.0 eq., 0.54 mmol, 55 mg), DMAP (0.1 eq., 0.018 mmol, 2 mg) were added to the mixture at 0 °C. Then 4-nitrobenzoyl chloride (3.0 eq., 0.54 mmol, 100 mg) was added, and the mixture was stirred at 0 °C for 0.5 h. Then the reaction mixture was quenched with saturated aq. NH<sub>4</sub>Cl (10 mL). The aqueous layer was extracted with DCM and the organic phase was dried over Na<sub>2</sub>SO<sub>4</sub>, filtered and concentrated *in vacuo*. The final product was achieved by flash column chromatography as white solid in 73% yield.

## Supplementary Discussion 1

### Preliminary Mechanism Study with HRMS

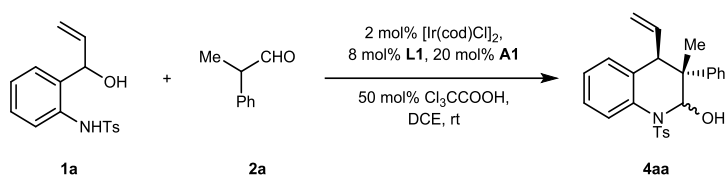

Under standard reaction conditions, the key intermediates **V** and **VI** (**4aa**) were detected by HRMS after 12 h, which was in correspondence with the proposed mechanism to generate hemiaminal **4aa** in

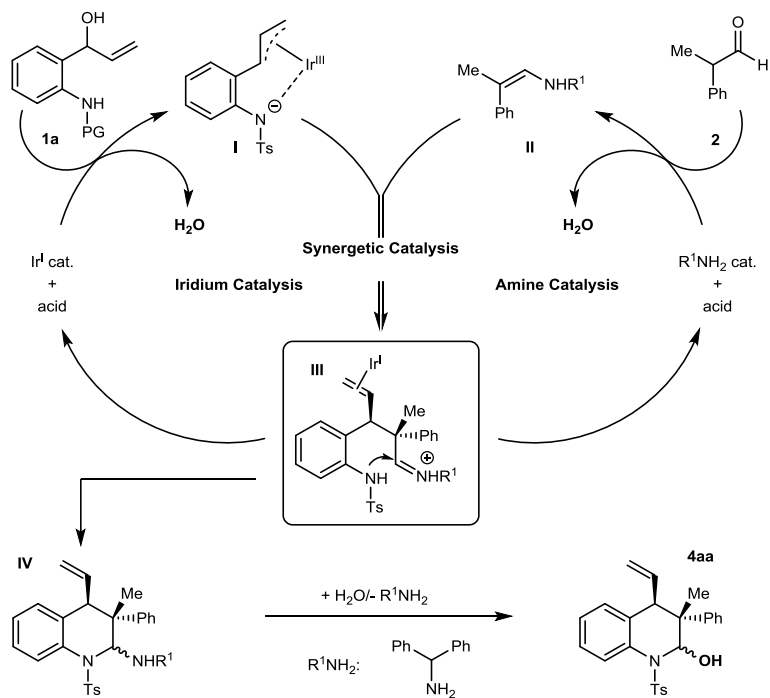

**Supplementary Figure 92.** The proposed mechanism



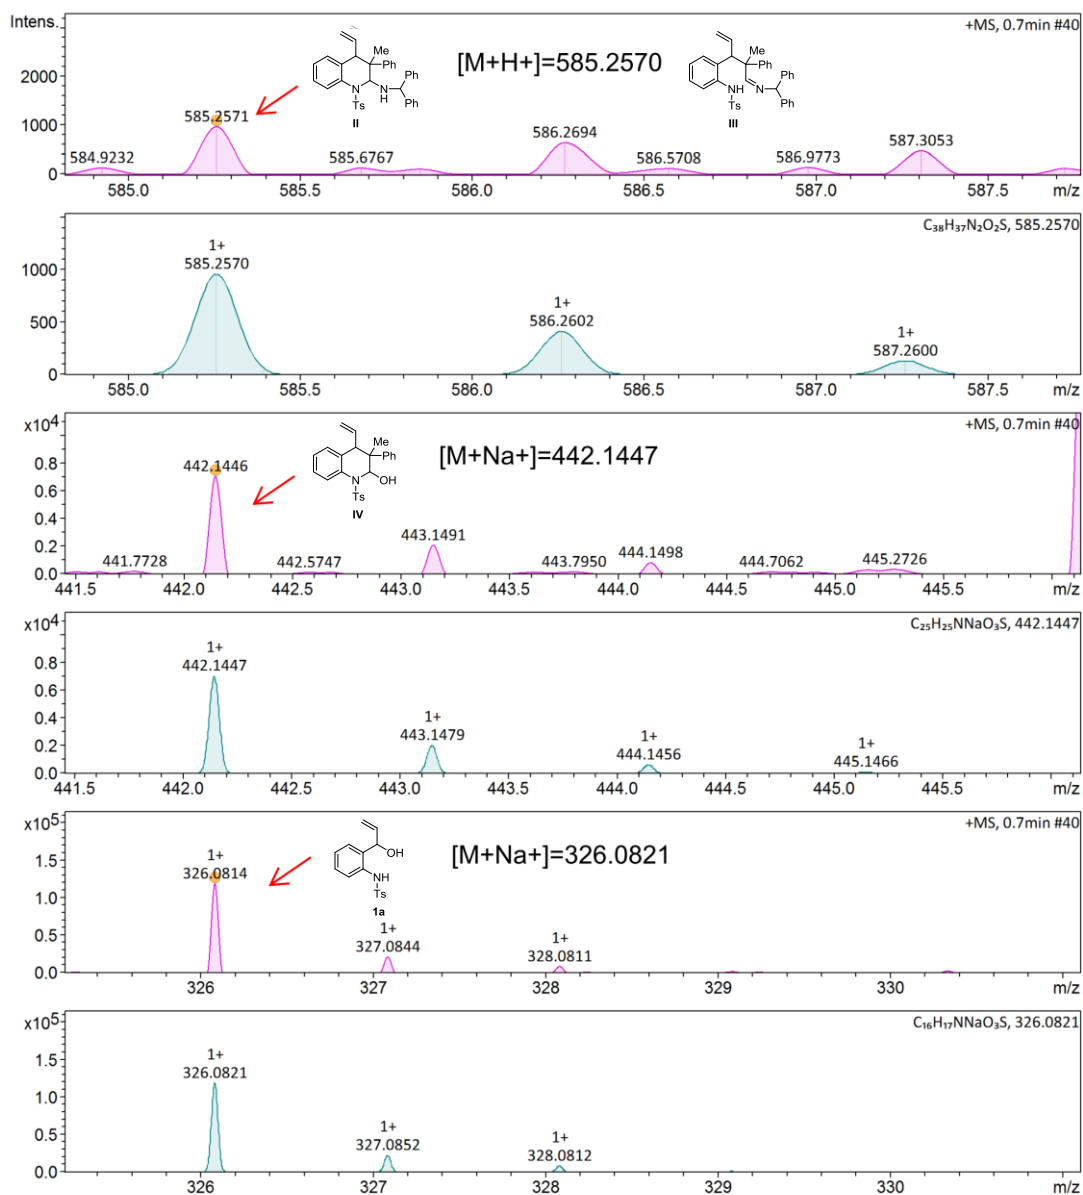

**Supplementary Figure 93.** The copies of HRMS of reaction mixture (12 h)

## Supplementary Discussion 2

### Proposed Stereo-Control Models for Asymmetric Cycloadditions

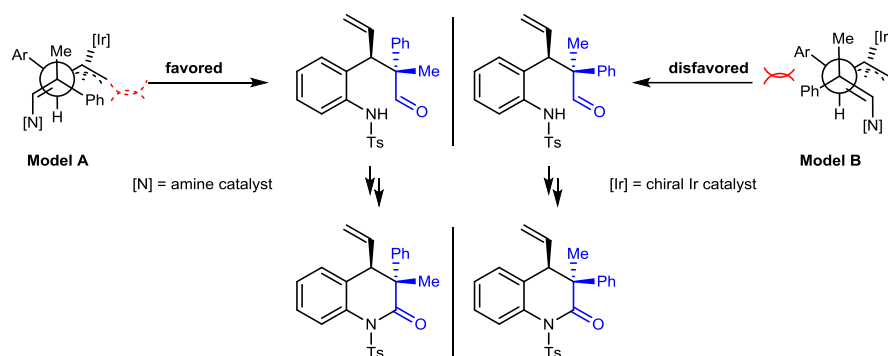

**Supplementary Figure 94.** Proposed stereochemical models for aldehyde cycloadditions

According to Sunoj's detailed computational study<sup>8</sup> and Carreira's experimental mechanistic study<sup>9,10</sup> on the Ir-catalyzed allylic alkylation of carbonyls, the chiral  $\pi$ -allyl-Ir complex controls the enantioselectivity of the stereocenter on the allyl part (as shown in **Supplementary Figure 94**, Model A). The *Si*- or *Re*-face attack of enamine nucleophile onto the  $\pi$ -allyl-Ir complex leads to two different diastereoisomers. Based on these information, Model A and B was depicted with the formulas Newman projection. It was proposed that the different steric repulsion between enamine and  $\pi$ -allyl-Ir complex resulted in diastereoselectivity.

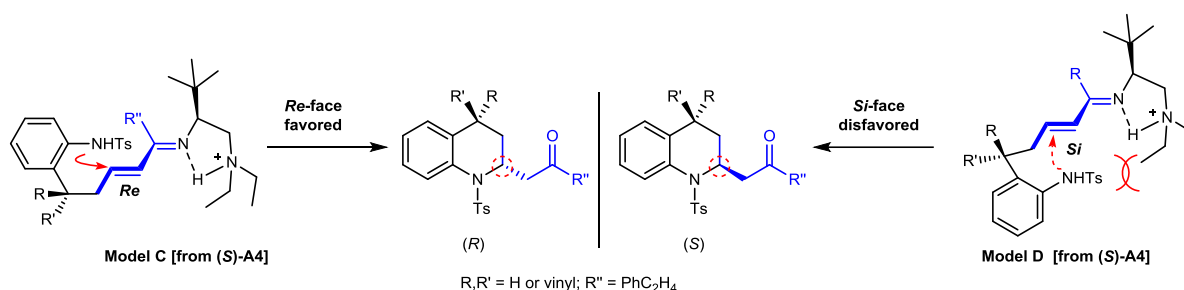

**Supplementary Figure 95.** Proposed stereochemical model for the cycloadditions of  $\beta,\gamma$ -unsaturated ketones

For the formal cycloaddition with  $\beta,\gamma$ -unsaturated ketone, there are two sequential processes including an Ir-catalyzed asymmetric intermolecular allylation of dienamine intermediate and a primary amine-catalyzed asymmetric intramolecular aza-Michael addition. The enantioselectivity of allylation steps was determined by the chiral Ir catalyst according to the work of Sunoj<sup>8</sup> and Carreira.<sup>9,10</sup> The stereo-control of the second step was proposed according to Luo's mode<sup>11</sup> which was used to rationally illustrate the enantio-induction of asymmetric Michael additions using the same

chiral primary amine catalyst. It was believed that, the allylic stereocenter was far from the  $\beta$ -position of conjugated iminium, thus not affecting the intramolecular asymmetric Michael addition step.

### Supplementary References

- (1) Wang, Q., Li, T.-R., Lu, L.-Q., Li, M.-M., Zhang, K. & Xiao, W.-J. Catalytic asymmetric [4+1] annulation of sulfur ylides with copper-allenylidene intermediates. *J. Am. Chem. Soc.* **138**, 8360-8363 (2016).
- (2) Witten, M. R. & Jacobsen, E. N. A Simple primary amine catalyst for enantioselective  $\alpha$ -hydroxylations and  $\alpha$ -fluorinations of branched aldehydes. *Org. Lett.* **17**, 2772-2775 (2015).
- (3) Hoffmann, S., Nicoletti, M. & List, B. Catalytic asymmetric reductive amination of aldehydes via dynamic kinetic resolution. *J. Am. Chem. Soc.* **128**, 13074-13075 (2006).
- (4) Cruz, F. A. & Dong, V. M. Stereodivergent coupling of aldehydes and alkynes via synergistic catalysis using Rh and Jacobsen's amine. *J. Am. Chem. Soc.* **139**, 1029-1032 (2017).
- (5) Franzoni, I., Guénéeb, L. & Mazet, C. Access to congested quaternary centers by Pd-catalyzed intermolecular  $\gamma$ -arylation of unactivated  $\alpha,\beta$ -unsaturated aldehydes *Chem. Sci.* **4**, 2619-2624 (2013).
- (6) Hamilton, J. Y., Sarlah, D. & Carreira, E. M. Iridium-catalyzed enantioselective allylic vinylation with potassium alkenyltrifluoroborates. *Org. Synth.* **92**, 1-12 (2015).
- (7) Zhan, G., He, Q., Yuan, X. & Chen, Y.-C. Asymmetric direct vinylogous Michael additions of allyl alkyl ketones to maleimides through dienamine catalysis. *Org. Lett.* **16**, 6000-6003 (2014).
- (8) Bhaskararao, B. & Sunoj, R. B. Origin of stereodivergence in cooperative asymmetric catalysis with simultaneous involvement of two chiral catalysts. *J. Am. Chem. Soc.* **137**, 15712-15722 (2015).
- (9) Rössler, S. L., Krautwald, S. & Carreira, E. M. Study of intermediates in iridium-(phosphoramidite,olefin)-catalyzed enantioselective allylic substitution. *J. Am. Chem. Soc.* **139**, 3603-3606 (2017).
- (10) Schafroth, M. A., Rummelt, S. M., Sarlah, D. & Carreira, E. M. Enantioselective iridium-catalyzed allylic cyclizations. *Org. Lett.* **19**, 3235-3238 (2017).
- (11) Zhu, L., Zhang, L. & Luo, S. Catalytic asymmetric  $\beta$ -c-h functionalizations of ketones via enamine oxidation. *Org. Lett.* **20**, 1672-1675 (2018).
